# Supplementary material for: Subfunctionalized expression drives evolutionary retention of ribosomal protein paralogs Rps27 and Rps27l in vertebrates
Source: eLife. 2023 Jun 12;12:e78695. doi: 10.7554/eLife.78695 (PMC10313321; doi:10.7554/eLife.78695)
Supplement: Figure 3—source data 4. [file elife-78695-fig3-data4.xlsx]

## Sheet: Figure 3G
Gene ontology term	# of genes	p-value
Cytoskeleton organization	15	9.2e-09
Cell cycle process	14	9.2e-09
Mitotic cell cycle	12	1.9e-08
Nuclear chromosome segregation	7	4.8e-07
DNA repair	8	2.4e-06
Regulation of cell cycle	10	7.6e-06
