# Supplementary material for: Subfunctionalized expression drives evolutionary retention of ribosomal protein paralogs Rps27 and Rps27l in vertebrates
Source: eLife. 2023 Jun 12;12:e78695. doi: 10.7554/eLife.78695 (PMC10313321; doi:10.7554/eLife.78695)
Supplement: Figure 4—source data 15. [file elife-78695-fig4-data15.xlsx]

## Sheet: Figure 4B left
Genotype	Ct.	%
Rps27 +/+	11	39
Rps27 exon2del / +	17	61
Rps27 exon2del / exon2del	0	0
Total	28

## Sheet: Figure 4B right
Genotype	Ct.	%
Rps27l +/+	13	27
Rps27l exon2del / +	34	69
Rps27l exon2del / exon2del	2*	4
Total	49

## Sheet: Figure 4C
Genotype	Ct.	%
Rps27 +/+	10	29
Rps27 exon2del / +	24	69
Rps27 exon2del / exon2del	1*	3
Total	35

## Sheet: Figure 4G top
Rps27 genotype	Trp53 genotype	Ct.	%
Rps27 +/+	Trp53 +/+	10	71
Rps27 exon2del / +		4	29
Rps27 exon2del / exon2del		0	0
	Total	14
Rps27 +/+	Trp53 null /+	8	26
Rps27 exon2del / +		23	74
Rps27 exon2del / exon2del		0	0
	Total	31
Rps27 +/+	Trp53 null / null	4	60
Rps27 exon2del / +		3	40
Rps27 exon2del / exon2del		0	0
	Total	7
	Grand total	52

## Sheet: Figure 4G bottom
Rps27l genotype	Trp53 genotype	Ct.	%
Rps27l +/+	Trp53 +/+	3	60
Rps27l exon2del / +		2	40
Rps27l exon2del / exon2del		0	0
	Total	5
Rps27l +/+	Trp53 null /+	2	18
Rps27l exon2del / +		6	55
Rps27l exon2del / exon2del		3	27
	Total	11
Rps27l +/+	Trp53 null / null	1	60
Rps27l exon2del / +		2	40
Rps27l exon2del / exon2del		0	0
	Total	3
	Grand total	19
