# Supplementary material for: Subfunctionalized expression drives evolutionary retention of ribosomal protein paralogs Rps27 and Rps27l in vertebrates
Source: eLife. 2023 Jun 12;12:e78695. doi: 10.7554/eLife.78695 (PMC10313321; doi:10.7554/eLife.78695)
Supplement: Figure 5—source data 7. [file elife-78695-fig5-data7.xlsx]

## Sheet: Figure 5C left
Genotype	Ct.	%
Rps27 +/+	65	24
Rps27 Rps27l / +	131	49
Rps27 Rps27l / Rps27l	70	26
Total	266

## Sheet: Figure 5C right
Genotype	Ct.	%
Rps27l +/+	96	24
Rps27l Rps27 / +	205	52
Rps27l Rps27 / Rps27	93	24
Total	394
