# Supplementary material for: Subfunctionalized expression drives evolutionary retention of ribosomal protein paralogs Rps27 and Rps27l in vertebrates
Source: eLife. 2023 Jun 12;12:e78695. doi: 10.7554/eLife.78695 (PMC10313321; doi:10.7554/eLife.78695)
Supplement: Supplementary file 1. [file elife-78695-supp1.xlsx]

## Sheet: eS27 and eS27L orthologs
common name	species	# paralogs found	genome assembly	RPS27 % identity	eS27 cvg	annotated gene model	species shorthand	gene shorthand	paralog shorthand	mRNA ID	protein ID	CDS sequence	protein sequence	notes
sponge	Amphimedon queenslandica	1	Aqu1	91.7	1 to 84	y	sponge	1	sponge_1	Aqu2.1.40224_001	Aqu2.1.40224_001	ATGCCGTTGGCCAAGGACCTGCTTCATCCTTCTCCTGAAGAGGAAAAAAGAAAACACAAA CTGAAGCGTCTTGTGCAAAGCCCTAATAGTTTTTTTATGGATGTAAAGTGTCCAGGGTGT TACAAGATTACAACTGTGTTCAGTCATGCACAGACTGTTGTACTTTGTGCAAATTGTAGA AATGTCCTCTGCCAACCTACTGGAGGAAAGGCAAGACTAACAGAAGGATGTTCCTTTAGA AGAAAACCTCATTAA	MPLAKDLLHPSPEEEKRKHKLKRLVQSPNSFFMDVKCPGCYKITTVFSHAQTVVLCANCR NVLCQPTGGKARLTEGCSFRRKPH
limpet	Lottia gigantea	1	Lotgi1	90.5	1 to 84	y	limpet	1	limpet_1	LotgiT191640	LotgiP191640	ATGCCTTTAGCTACAGATCTATTGCATCCCTCATTGGAGGACGAAAAGAAGAAATCTAAA TTGAGAAGATTGGTTCAAGCGCCAAATAGTTACTTTATGGATGTTAAATGCCCAGGCTGC TACAAAATCACAACAGTGTTTAGTCATGCACAAACAGTAGTTTTATGTGTTGGATGTTCA ACTGTTTTGTGTCAACCAACTGGTGGTAAAGCCAGATTAACAGAAGGATGTTCATTCCGA AGGAAACAGCACTAA	MPLATDLLHPSLEDEKKKSKLRRLVQAPNSYFMDVKCPGCYKITTVFSHAQTVVLCVGCS TVLCQPTGGKARLTEGCSFRRKQH
worm	Caenorhabditis elegans	1	WBcel235	79.518	1 to 83	y	worm	1	worm_1	F56E10.4.1	F56E10.4.1	ATGCCTTTGGCCGTTGACCTTCTTCACCCAGAGCCACAAAGGGAGATCAGATGCCACAAG CTTAAGCGTCTTGTTCAACACCCAAACTCCTACTTCATGGACGTTAAGTGCTCGGGATGC TTCAAGATTTCGACCGTCTTCTCGCACGCCACCACCGTCGTCGTCTGCGTTGGATGCAAC ACCGTCCTCTGCCAGCCAACCCGAGGAAAGGCCAAGCTCACCGAGGGATGCTCCTTCCGC AAGAAGCAATAA	MPLAVDLLHPEPQREIRCHKLKRLVQHPNSYFMDVKCSGCFKISTVFSHATTVVVCVGCN TVLCQPTRGKAKLTEGCSFRKKQ
fly	Drosophila melanogaster	1	BDGP6.32	85.366	1 to 82	y	fly	1	fly_1	RpS27-RA	FBpp0084242	ATGCCGCTAGCAAAAGATCTTCTGCACCCTCTGCCCGCCGAGGAGAAGCGCAAGCACAAG CTGAAGCGCCTGGTCCAGCACCCCAACTCGTACTTCATGGACGTGAAGTGCCCCGGCTGC TACAGGATCACCACCGTCTTCAGCCACGCCCAAGGCGTCGTGGTCTGCGCTGGATGCGCT ACCATTTTGTGCCAGCCGACTGGAGGACGCGCCAAGCTGACAGAAGGCTGCTCCTTCCGC AGGAAGCCACAGTAA	MPLAKDLLHPLPAEEKRKHKLKRLVQHPNSYFMDVKCPGCYRITTVFSHAQGVVVCAGCA TILCQPTGGRAKLTEGCSFRRKPQ
crinoid	Dorometra sesokonis	1	GCA_025631205.1	94.59	3 to 76	n	crinoid	1	crinoid_1	JAOTQE010093975.1 +[1542-1652, 3369-3482]	JAOTQE010093975.1 +[1542-1652, 3369-3482]	CTCGCCAAAGATTTGTTAAACCCAAGCTTAGAGAGTGAGAAGAGGAGACACAAGAAGAAGAGATTAGTGCAGAGTCCTAACTCATACTTTATGGATGTTAAGTGTCCAGGTTGTTATAAAATTACCACTGTGTTCAGTCATGCACAGACAGTGGTGTTGTGTGTTGGTTGCTCCACAGTTCTATGCCAACCTACAGGAGGCAAAGCAAGACTAACAGAAGGT	LAKDLLNPSLESEKRRHKKKRLVQSPNSYFMDVKCPGCYKITTVFSHAQTVVLCVGCSTVLCQPTGGKARLTEG	likely missing 1st and last exons, CDS on those too small to BLAST
sea urchin	Strongylocentrotus purpuratus	1	Spur_5.0	90.5	1 to 84	y	sea_urchin	1	sea_urchin_1	XM_003728133	XP_003728181	ATGCCTCTTGCACAAGATCTACTAAACCCAACCCTTGAGAGTGAGAGGAGGAGGCACAAG AAGAAGCGTCTTGTGCAGAGTCCTAACTCATACTTCATGGATGTGAAGTGCCCAGGCTGC TACAAGATCACAACTGTGTTCAGCCATGCACAGACAGTTGTTCTGTGCGTAGGTTGCTCA ACCGTGCTCTGCCAACCCACCGGAGGGAAGGCACGATTGACTGAAGGTTGCTCCTTCAGA AGAAAAGCCCACTAA	MPLAQDLLNPTLESERRRHKKKRLVQSPNSYFMDVKCPGCYKITTVFSHAQTVVLCVGCS TVLCQPTGGKARLTEGCSFRRKAH
sea star	Acanthaster planci	1	OKI_Apl_1.0	92.9	1 to 84	y	sea_star	1	sea_star_1	XM_022235155.1	XP_022090847.1	ATGCCGCTCGCCAGAGATTTGATCAACCCCAGCCTCGAGTCTGAGAAGCGTAAGCACAAG AAGAAGCGCTTGGTGCAGAGTCCAAATTCCTACTTCATGGACGTCAAGTGCCCAGGTTGC TACAAGATCACGACTGTGTTCAGCCATGCCCAGACTGTGGTCCTGTGTGTTGGATGCTCC ACCGTGCTGTGTCAGCCCACGGGTGGCAAGGCAAGGCTCACAGAAGGCTGCTCCTTCAGG AGGAAGGCCCATTAA	MPLARDLINPSLESEKRKHKKKRLVQSPNSYFMDVKCPGCYKITTVFSHAQTVVLCVGCS TVLCQPTGGKARLTEGCSFRRKAH
amphioxus	Branchiostoma floridae	1	GCF_000003815.2	98.81	1 to 84	y	amphioxus	1	amphioxus_1	XM_035814530.1:166-420	XP_035670423.1	ATGCCTTTGGCAAAGGACTTGCTGCATCCCTCCCCAGAGGAGGAAAAGAGGAAGCACAAGAAGAAGAGGC TGGTTCAGAGCCCCAATAGTTACTTCATGGACGTCAAATGTCCTGGTTGCTATAAGATCACCACAGTTTT CAGCCATGCCCAGACAGTAGTTCTGTGTGTAGGGTGTTCAACAGTGCTGTGTCAGCCGACAGGGGGCAGG GCTAGGCTTACAGAAGGCTGCTCGTTCAGACGGAAGCAGCACTAA	MPLAKDLLHPSPEEEKRKHKKKRLVQSPNSYFMDVKCPGCYKITTVFSHAQTVVLCVGCSTVLCQPTGGR ARLTEGCSFRRKQH
sea squirt	Ciona savignyi	1	CSAV2.0	96.429	1 to 84	y	sea_squirt	1	sea_squirt_1	ENSCSAVT00000009108.1	ENSCSAVP00000008994	ATGCCGTTGGCGATTGATTTATTACATCCTTCCCCGGAAGAAGAAAAGAGGAGACACAAA AAGAAGCGACTGGTTCAGTCTCCTAACTCATACTTTATGGACGTCAAGTGCCCAGGTTGT TATAAAATCACAACTGTGTTTAGCCATGCACAAACTGTTGTGCTATGCGTTGGATGTTCC ACTGTCCTGTGCCAACCTACTGGAGGAAGGGCAAGGCTGACAGAGGGTTGTTCCTTCCGA AGGAAGCAACACTAA	MPLAIDLLHPSPEEEKRRHKKKRLVQSPNSYFMDVKCPGCYKITTVFSHAQTVVLCVGCS TVLCQPTGGRARLTEGCSFRRKQH
hagfish	Eptatretus burgeri	1	Eburgeri_3.2	78.69	24 to 84	n	hagfish	1	hagfish_1	RNASEQT00000402449	RNASEQP00000402432	ATGATGTCTTCTTTAGCAGAGTCATCAAATATCTTTGAAGTGCGTGGAGGTTGCTACAAA ATCACAACGGTGTTTAGTCATGCACAGACTGTGGTTCTCTGCGTTGGCTGTTCCACTGTC CTGTGCCAACCCACTGGGGGCAAGGCTCGCCTTTCAGAAGGCTGCTCCTTCAGGAGGAAA CAAAATTGA	MMSSLAESSNIFEVRGGCYKITTVFSHAQTVVLCVGCSTVLCQPTGGKARLSEGCSFRRK QN	Blood RNA-seq model in Ensembl has best alignment/coverage versus human eS27. RefSeq has a genome but no annotation. tblastn of human eS27 exon 2 yielded no hits, even w/ distant homology setting Human S27 has no ortholog in hagfish, per Ensembl
lamprey	Petromyzon marinus	2	Pmarinus_7.0	95.238	1 to 84	y	lamprey	2	lamprey_2	ENSPMAT00000002885.1	ENSPMAP00000002871	ATGCCTCTCGCAAAGGACTTGCTTCACCCTTCCCTCGAAGCGGAGAGGAGGTGTCACAAG AAGAAGCGACTTGTGCAGAGCCCCAATTCTTACTTTATGGATGTGAAATGCCCGGGCTGC TACAAGATCACAACGGTGTTCAGCCATGCACAGACCGTGGTTCTGTGCGTCGGCTGCTCC ACCGTCCTCTGCCAGCCCACAGGCGGCAAGGCCCGTCTGACAGAGGGCTGCTCATTCCGT AGGAAGCAGCATTAA	MPLAKDLLHPSLEAERRCHKKKRLVQSPNSYFMDVKCPGCYKITTVFSHAQTVVLCVGCS TVLCQPTGGKARLTEGCSFRRKQH	Same identified by Kuang et al 2020, but they did not identify the S27L gene (only reported 1)
lamprey	Petromyzon marinus	2	Pmarinus_7.0	97.619	1 to 84	y	lamprey	1	lamprey_1	RPS27L-201	ENSPMAP00000003408	ATGCCTCTCGCCAAAGACTTACTGCATCCGTCCCTCGTCGAAGAGAAGAGGAAACACAAG AAGAAGCGTCTCGTTCAGAGCCCTAACTCCTACTTCATGGATGTGAAATGCCCAGGCTGC TACAAGATCACCACCGTGTTCAGCCATGCCCAGACGGTGGTGCTGTGCGTGGGCTGCTCC ACGGTGCTGTGCCAGCCCACGGGGGGGAAGGCGCGACTCACAGAAGGGTGCTCCTTCAGG AGAAAGCAGCATTAG	MPLAKDLLHPSLVEEKRKHKKKRLVQSPNSYFMDVKCPGCYKITTVFSHAQTVVLCVGCS TVLCQPTGGKARLTEGCSFRRKQH
shark	Carcharodon carcharias	2	GCF_017639515.1	100	1 to 84	y	shark	1	shark_1	XM_041181665.1:98-352	XP_041037599.1	ATGCCTCTGGCAAAAGATTTGTTGCATCCATCTCCCGAGGAGGAGAAGAGGAAACACAAGAAGAAGCGTC TGGTGCAAAGTCCCAACTCCTACTTCATGGATGTCAAGTGCCCTGGTTGCTACAAAATCACTACTGTGTT CAGCCATGCACAGACAGTAGTGCTGTGTGTTGGATGCTCCACCGTACTCTGCCAGCCCACCGGAGGAAAG GCCAGGTTAACAGAAGGCTGTTCCTTCAGAAGAAAGCAGCACTAA	MPLAKDLLHPSPEEEKRKHKKKRLVQSPNSYFMDVKCPGCYKITTVFSHAQTVVLCVGCSTVLCQPTGGK ARLTEGCSFRRKQH
shark	Carcharodon carcharias	2	GCF_017639515.1	94.05	1 to 84	y	shark	2	shark_2	XM_041178180.1:138-392	XP_041034114.1	ATGCCGTTGGCCAAAGATTTGCTAAACCCGTCTCCTGAAGCAGAACGGAAGCAGCACAAGAAGAAACGTC TGGTGCAAAGCCCCAACTCGTACTTCATGGATGTCAAGTGCCCAGGCTGCTACAAGATCACAACGGTGTT TAGCCATGCCCAGACTGTCGTGTTGTGTGTCGGCTGCTCCACAGTTCTGTGCCAGCCCACTGGGGGCAAG GCCAGACTCACAGAAGGCTGCTCATTCCGGAGGAAGCAGCACTGA	MPLAKDLLNPSPEAERKQHKKKRLVQSPNSYFMDVKCPGCYKITTVFSHAQTVVLCVGCSTVLCQPTGGK ARLTEGCSFRRKQH
coelacanth	Latimeria chalumnae	2	LatCha1	100	1 to 84	y	coelacanth	1	coelacanth_1	RPS27-201	ENSLACP00000008947	ATGCCTCTCGCGAAAGATTTGTTACACCCATCTCCTGAAGAGGAGAAGAGGAAACACAAG AAGAAGCGTCTGGTCCAGAGTCCTAACTCCTACTTTATGGATGTGAAATGCCCAGGTTGC TATAAAATCACCACCGTGTTTAGCCATGCGCAAACGGTGGTGCTGTGTGTGGGTTGCTCT ACTGTGTTGTGTCAGCCCACTGGCGGAAAGGCTCGACTTACAGAAGGATGCTCTTTCAGA CGAAAGCAGCACTAA	MPLAKDLLHPSPEEEKRKHKKKRLVQSPNSYFMDVKCPGCYKITTVFSHAQTVVLCVGCS TVLCQPTGGKARLTEGCSFRRKQH	Kuang et al 2020 reported 2: XP_005989946,XP_005987787
coelacanth	Latimeria chalumnae	2	LatCha1	95.238	1 to 84	y	coelacanth	2	coelacanth_2	ENSLACT00000014483.2	ENSLACP00000014383	ATGCCATTGGCTCGAGATTTGCTGCATCCTTCTGTAGAGGTGGAAAAGAGAAAGCATAAG AAAAAGCGTCTGGTTCAGTGCCCAAATTCTTATTTTATGGACGTCAAGTGCCCAGGATGC TACAAGATCACCACTGTGTTCAGCCATGCTCAGACGGTTGTTCTGTGTGTAGGCTGCTCA ACAGTGCTGTGCCAGCCTACAGGAGGAAAGGCCAGACTCACAGAAGGCTGCTCGTTCAGG AGAAAACAACACTAA	MPLARDLLHPSVEVEKRKHKKKRLVQCPNSYFMDVKCPGCYKITTVFSHAQTVVLCVGCS TVLCQPTGGKARLTEGCSFRRKQH
lungfish	Protopterus annectens	2	GCF_019279795.1	98.81	1 to 84	y	lungfish	1	lungfish_1	XM_044079920.1:98-352	XP_043935855.1	ATGCCTCTTGCTAAAGATTTGTTGCATCCGACTCCTGAGGAGGAGAAGAGGAAGCACAAAAAGAAGCGTC TGGTCCAGAGTCCTAATTCTTATTTTATGGATGTAAAATGTCCAGGTTGCTACAAGATTACCACTGTGTT TAGCCATGCCCAGACAGTAGTGCTTTGTGTCGGCTGTTCTACTGTGCTCTGTCAGCCCACAGGAGGAAAA GCCAGGCTCACAGAAGGCTGCTCATTCCGAAGGAAGCAGCATTAG	MPLAKDLLHPTPEEEKRKHKKKRLVQSPNSYFMDVKCPGCYKITTVFSHAQTVVLCVGCSTVLCQPTGGK ARLTEGCSFRRKQH
lungfish	Protopterus annectens	2	GCF_019279795.1	90.48	1 to 84	y	lungfish	2	lungfish_2	XM_044090712.1:98-352	XP_043946647.1	ATGCCTCTCGCGAAAGACTTACTACACCCTTCCCTTGAGGAAGAAAGGCAAAGACACAAGAAAAAGCGCT TGGTTCAGTCTCCGAATTCTTACTTTATGGATGTCAAATGTCCAGGTTGCTACAAAATTACAACAGTGTT CAGTCATGCTCAGAGTGTAGTGCTATGCATTGGATGTGCCACTGTCCTCTGTCAGCCTACGGGAGGAAAA TGTCGGCTAACAGAGGGTTGCTCATTCAGAAGAAAACAACATTAA	MPLAKDLLHPSLEEERQRHKKKRLVQSPNSYFMDVKCPGCYKITTVFSHAQSVVLCIGCATVLCQPTGGK CRLTEGCSFRRKQH
caecillian	Geotrypetes seraphini	2	GCF_902459505.1	100	1 to 84	y	caecillian	1	caecillian_1	XM_033923579.1:144-398	XP_033779470.1	ATGCCGCTGGCCAAGGATCTCCTGCATCCGTCCCCCGAGGAGGAGAAGAGGAAGCACAAGAAGAAGCGGC TGGTCCAGAGCCCCAACTCCTACTTCATGGACGTCAAGTGCCCAGGTTGCTATAAAATCACCACTGTATT TAGCCATGCCCAAACTGTGGTTCTTTGTGTGGGCTGCTCAACTGTGCTTTGTCAGCCCACTGGTGGAAAA GCAAGGCTCACTGAAGGATGTTCCTTCAGACGGAAGCAGCACTAA	MPLAKDLLHPSPEEEKRKHKKKRLVQSPNSYFMDVKCPGCYKITTVFSHAQTVVLCVGCSTVLCQPTGGK ARLTEGCSFRRKQH
caecillian	Geotrypetes seraphini	2	GCF_902459505.1	84.52	1 to 84	y	caecillian	2	caecillian_2	XM_033953840.1:152-406	XP_033809731.1	ATGCCTCTTGCTCAGGATTTCCTGCACCCTCTCCACGACAGGGAGAGGCAGAGGCACAAGAAGAAACGCC TGGTTCAGAGTCCAAATTCCTACTTCATGGATGTCAAGTGCCCAGGCTGTTATAAAATCACAACTGTGTT CAGCCATGCTCAAAGCGTCGTGCTATGTGTTGGCTGCTCCACGATTCTCTGTCAGCCAACTGGAGGCAAG TGCCGCCTCACAGAGGGCTGTTCTTTCAGAAGAAAACCGCATTAG	MPLAQDFLHPLHDRERQRHKKKRLVQSPNSYFMDVKCPGCYKITTVFSHAQSVVLCVGCSTILCQPTGGK CRLTEGCSFRRKPH
frog	Xenopus tropicalis	2	UCB_Xtro_10.0	100	1 to 84	y	frog	1	frog_1	rps27-201	ENSXETP00000108945	ATGCCTCTCGCTAAGGATCTCCTGCACCCCTCTCCCGAGGAGGAGAAGAGGAAACACAAG AAGAAGCGCCTGGTCCAGAGCCCAAACTCCTACTTCATGGACGTAAAATGCCCAGGTTGC TACAAGATCACCACGGTGTTCAGTCACGCTCAGACGGTGGTACTGTGTGTGGGCTGCTCC ACGGTCCTGTGTCAGCCCACCGGGGGCAAGGCAAGGCTCACAGAAGGATGTTCCTTCCGA CGAAAGCAGCACTAA	MPLAKDLLHPSPEEEKRKHKKKRLVQSPNSYFMDVKCPGCYKITTVFSHAQTVVLCVGCS TVLCQPTGGKARLTEGCSFRRKQH
frog	Xenopus tropicalis	2	UCB_Xtro_10.0	96.341	3 to 84	y	frog	2	frog_2	NM_001171652.1:18-272	NP_001165123.1	ATGCCTTTGGCTAAAGATTTACTGTTGCCATCCTCTGAGGAGGAGAAAAGGAGACACAAGAAAAAAAGGC TTGTCCAGAGCCCAAATTCTTACTTCATGGATGTTAAATGCCCAGGCTGCTACAAGATCACCACGGTTTT TAGTCATGCTCAGACTGTTGTTCTCTGTGTAGGCTGCTCTACAGTTCTTTGCCAGCCCACAGGTGGCAAA GCCAGGCTCACAGAAGGATGTTCCTTCAGACGAAAGCAGCATTAG	MPLAKDLLLPSSEEEKRRHKKKRLVQSPNSYFMDVKCPGCYKITTVFSHAQTVVLCVGCSTVLCQPTGGK ARLTEGCSFRRKQH
newt	Pleurodeles waltl	2	GCA_026652325.1	100	1 to 84	y	newt	1	newt_1	KAJ1080978.1	KAJ1080978.1	ATGCCTCTCGCAAAAGATCTCTTACATCCGTCTCCTGAGGAGGAGAAGAGGAAACACAAGAAGAAGCGCCTGGTGCAGAGTCCAAACTCTTACTTCATGGATGTGAAGTGTCCAGGTTGCTACAAAATCACCACTGTATTTAGCCATGCACAAACGGTGGTCCTGTGTGTAGGCTGCTCTACGGTTCTTTGTCAGCCCACAGGAGGAAAGGCGAGGCTCACGGAAGGTTGCTCCTTCAGACGAAAACAGCACTAA	MPLAKDLLHPSPEEEKRKHKKKRLVQSPNSYFMDVKCPGCYKITTVFSHAQTVVLCVGCSTVLCQPTGGK ARLTEGCSFRRKQH
newt	Pleurodeles waltl	2	GCA_026652325.1	94.05	1 to 84	y	newt	2	newt_2	KAJ1181862.1	KAJ1181862.1	ATGCCCTTGGCAAAGGACCTACTACTTCCTCCTCTTGAAGAGGAGAGGCGAAAACACAAAAAAAAGCGCCTGGTTCAGAATCCTAACTCCTACTTTATGGATGTCAAATGTCCAGGCTGCTATAAGATCACCACAGTGTTCAGCCATGCACAGACGGTTGTGTTGTGTGTAGGATGCTCCACTGTGCTGTGCCAGCCCACGGGAGGAAAAGCCAGACTTACAGAAGGATGTTCATTTAGAAGAAAACAACACTGA	MPLAKDLLLPPLEEERRKHKKKRLVQNPNSYFMDVKCPGCYKITTVFSHAQ TVVLCVGCSTVLCQPTGGKARLTEGCSFRRKQH	Excluding N-terminal extension
lizard	Anolis carolinensis	1	AnoCar2.0v2	100	1 to 84	n	lizard	1	lizard_1	GENSCAN00000019742.1	GENSCAN00000019742.1	ATGCCTCTCGCAAAGGACCTCTTGCATCCCTCCCCTGAGGAGGAGAAGCGGAAGCACAAG AAGAAGCGCCTGGTCCAGAGCCCCAACTCGTATTTCATGGATGTGAAATGTCCAGGTTGC TACAAGATCACCACGGTCTTCAGCCATGCTCAGACGGTGGTTTTGTGCGTTGGCTGCTCA ACTGTGCTCTGCCAGCCCACCGGCGGAAAGGCACGGCTGACAGAAGGATGCTCCTTCCGG CGAAAGCAGCACTAG	MPLAKDLLHPSPEEEKRKHKKKRLVQSPNSYFMDVKCPGCYKITTVFSHAQTVVLCVGCS TVLCQPTGGKARLTEGCSFRRKQH	GENSCAN model is the closest match to human RPS27, even after searching Ensembl w/ distant homology setting, searching RPS27 by tblastn, searching UniProt, tblastn of exon 2 or exon 3 individually
chicken	Gallus gallus	2	bGalGal1.mat.broiler.GRCg7b	100	1 to 84	y	chicken	1	chicken_1	XM_015298608.4:35-289	XP_015154094.1	ATGCCTCTGGCCAAGGACCTCCTGCACCCCTCCCCGGAGGAGGAGAAGCGCAAGCACAAGAAGAAGCGCC TGGTGCAGAGCCCCAACTCCTACTTCATGGACGTCAAGTGCCCAGGCTGCTATAAGATCACCACCGTGTT CAGCCACGCGCAGACCGTGGTGCTCTGCGTGGGCTGCTCCACCGTGCTGTGCCAGCCCACGGGCGGCAAG GCGCGCCTCACAGAAGGATGCTCCTTCCGAAGAAAGCAGCATTAA	MPLAKDLLHPSPEEEKRKHKKKRLVQSPNSYFMDVKCPGCYKITTVFSHAQTVVLCVGCSTVLCQPTGGK ARLTEGCSFRRKQH
chicken	Gallus gallus	2	bGalGal1.mat.broiler.GRCg7b	95.234	1 to 84	y	chicken	2	chicken_2	RPS27L-201	ENSGALP00010036536	ATGCCTCTGGCGAGGGACCTGCTGCACCCCTCCCTGGAGGAGGAGAGGAGGAAGCACAAG AAGAAGCGTTTGGTGCAGAGCCCCAACTCCTACTTCATGGACGTGAAGTGCCCAGGATGC TACAAGATCACCACTGTGTTCAGCCACGCTCAGACAGTGGTTCTGTGTGTAGGCTGCTCA ACTATTCTGTGTCAGCCTACTGGGGGAAAAGCGAGGCTCACAGAAGGCTGTTCATTTAGA AGAAAGCAACACTGA	MPLARDLLHPSLEEERRKHKKKRLVQSPNSYFMDVKCPGCYKITTVFSHAQTVVLCVGCS TILCQPTGGKARLTEGCSFRRKQH
platypus	Ornithorhynchus anatinus	2	mOrnAna1.p.v1	100	1 to 84	y	platypus	1	platypus_1	ENSOANT00000064759.1	ENSOANP00000038462	ATGCCTCTCGCCAAAGACCTCCTGCATCCGTCCCCCGAGGAGGAGAAGCGGAAACACAAG AAGAAGCGGCTGGTGCAGAGCCCCAACTCCTATTTCATGGATGTGAAGTGCCCAGGATGC TATAAAATCACCACCGTCTTCAGCCACGCACAGACGGTGGTCCTCTGCGTCGGCTGCTCC ACCGTCCTCTGCCAGCCCACGGGGGGAAAGGCCCGGCTCACAGAAGGATGCTCCTTCCGG CGAAAGCAGCACTGA	MPLAKDLLHPSPEEEKRKHKKKRLVQSPNSYFMDVKCPGCYKITTVFSHAQTVVLCVGCS TVLCQPTGGKARLTEGCSFRRKQH
platypus	Ornithorhynchus anatinus	2	mOrnAna1.p.v1	95.238	1 to 84	y	platypus	2	platypus_2	ENSOANT00000063032.1	ENSOANP00000042676	ATGCCCTTGGCTAAAGACTTAGTGCATCCATCCTTAGAGGATGAGAAGAAGAAACACAAA AAGAAACGGCTGGTTCAGAGTCCAAATTCTTACTTTATGGATGTAAAGTGTCCAGGCTGC TACAAGATCACCACGGTGTTCAGCCATGCCCAAACGGTGGTTTTGTGTGTTGGTTGCTCA ACTGTGTTGTGCCAGCCAACGGGAGGCAAGGCCAGGCTCACAGAAGGATGCTCATTTAGA AGAAAGCAACACTAA	MPLAKDLVHPSLEDEKKKHKKKRLVQSPNSYFMDVKCPGCYKITTVFSHAQTVVLCVGCS TVLCQPTGGKARLTEGCSFRRKQH
opossum	Monodelphis domestica	2	ASM229v1	100	1 to 84	y	opossum	1	opossum_1	RPS27-201	ENSMODP00000021571	ATGCCTCTCGCGAAAGATCTCCTGCACCCCTCTCCCGAGGAGGAGAAGCGGAAGCACAAG AAGAAACGCCTGGTGCAGAGTCCGAACTCCTACTTCATGGATGTCAAGTGCCCCGGCTGC TATAAAATCACCACTGTCTTCAGCCATGCACAAACAGTGGTTCTCTGTGTGGGATGCTCC ACTGTACTCTGTCAGCCAACTGGAGGAAAGGCAAGACTTACAGAAGGATGTTCCTTCAGG AGGAAGCAGCACTAA	MPLAKDLLHPSPEEEKRKHKKKRLVQSPNSYFMDVKCPGCYKITTVFSHAQTVVLCVGCS TVLCQPTGGKARLTEGCSFRRKQH
opossum	Monodelphis domestica	2	ASM229v1	94.048	1 to 84	y	opossum	2	opossum_2	RPS27L-201	ENSMODP00000053445	ATGCCTTTGGCTAGAGATTTAGTGCATCCATCCCTAGAGGATGAAAAGAAGAAACATAAA AAGAAACGCCTGGTTCAGAGTCCAAATTCTTATTTTATGGATGTCAAGTGTCCAGGCTGC TATAAGATCACCACAGTCTTCAGTCATGCCCAGACAGTGGTTCTTTGTGTAGGTTGTTCA ACTGTGTTATGCCAGCCTACAGGAGGAAAGGCCAGACTCACAGAAGGTTGTTCATTTAGA AGAAAGCAACATTAA	MPLARDLVHPSLEDEKKKHKKKRLVQSPNSYFMDVKCPGCYKITTVFSHAQTVVLCVGCS TVLCQPTGGKARLTEGCSFRRKQH
cow	Bos taurus	2	ARS-UCD1.2	100	1 to 84	y	cow	1	cow_1	RPS27-201	ENSBTAP00000018414	ATGCCTCTCGCAAAGGATCTTCTTCATCCCTCTCCAGAAGAGGAGAAGAGGAAACACAAG AAGAAGCGCCTGGTGCAGAGCCCCAATTCCTATTTCATGGATGTAAAATGCCCAGGATGC TATAAAATCACCACCGTCTTTAGCCATGCACAAACAGTAGTCTTGTGTGTTGGCTGCTCT ACTGTCCTCTGCCAGCCTACAGGAGGAAAAGCGAGGCTTACAGAAGGATGCTCTTTCAGA CGGAAGCAGCACTAA	MPLAKDLLHPSPEEEKRKHKKKRLVQSPNSYFMDVKCPGCYKITTVFSHAQTVVLCVGCS TVLCQPTGGKARLTEGCSFRRKQH	Possibly 2 other 2-exon protein-coding paralog on ENSBTAP00000073206 chr 5 and ENSBTAP00000052430 chr 3. Matches latter 40-60 aa of human RPS27 but N-term significantly extended/different, and lacks the exon 3-4 junction
cow	Bos taurus	2	ARS-UCD1.2	95.238	1 to 84	y	cow	2	cow_2	RPS27L-201	ENSBTAP00000017146	ATGCCTTTAGCTAGAGATTTACTGCATCCTTCCTTGGACGAGGAAAAGAAAAAACATAAA AAGAAACGGCTGGTTCAAAGTCCAAATTCTTACTTCATGGATGTAAAATGTCCAGGTTGC TACAAGATTACCACGGTCTTCAGCCATGCTCAGACAGTAGTGCTTTGCGTAGGCTGTTCA ACAGTGCTGTGCCAGCCAACAGGAGGAAAGGCCAGACTCACAGAAGGCTGTTCATTTAGA AGGAAGCAACACTAA	MPLARDLLHPSLDEEKKKHKKKRLVQSPNSYFMDVKCPGCYKITTVFSHAQTVVLCVGCS TVLCQPTGGKARLTEGCSFRRKQH
mouse	Mus musculus	2	GRCm39	100	1 to 84	y	mouse	1	mouse_1	Rps27-201	ENSMUSP00000132102	ATGCCTCTCGCAAAGGATCTCCTTCATCCCTCTCCAGAAGAGGAGAAGAGGAAACACAAG AAAAAGCGCCTGGTGCAGAGCCCCAATTCCTACTTTATGGACGTGAAATGCCCAGGATGC TATAAAATCACCACGGTCTTTAGCCATGCACAAACGGTAGTCTTGTGTGTTGGCTGCTCC ACTGTCCTCTGTCAGCCTACAGGTGGAAAAGCAAGGCTGACAGAAGGATGCTCCTTCAGG AGGAAGCAGCACTGA	MPLAKDLLHPSPEEEKRKHKKKRLVQSPNSYFMDVKCPGCYKITTVFSHAQTVVLCVGCS TVLCQPTGGKARLTEGCSFRRKQH
mouse	Mus musculus	2	GRCm39	96.429	1 to 84	y	mouse	2	mouse_2	Rps27l-201	ENSMUSP00000046016	ATGCCCCTGGCTAGAGATCTGTTACACCCTTCCTTGGAGGAGGAGAAGAAAAAACATAAG AAGAAACGGCTGGTTCAGAGCCCAAATTCTTACTTCATGGATGTGAAATGTCCAGGTTGC TACAAGATTACTACAGTTTTCAGCCATGCACAGACTGTGGTTCTTTGTGTGGGTTGTTCA ACTGTGTTGTGCCAGCCCACAGGAGGAAAAGCCAGGCTCACAGAAGGCTGTTCATTTAGA AGAAAGCAACACTAA	MPLARDLLHPSLEEEKKKHKKKRLVQSPNSYFMDVKCPGCYKITTVFSHAQTVVLCVGCS TVLCQPTGGKARLTEGCSFRRKQH
human	Homo sapiens	2	GRCh38:CM000663.2	100	1 to 84	y	human	1	human_1	RPS27-205	ENSP00000499044	ATGCCTCTCGCAAAGGATCTCCTTCATCCCTCTCCAGAAGAGGAGAAGAGGAAACACAAG AAGAAACGCCTGGTGCAGAGCCCCAATTCCTACTTCATGGATGTGAAATGCCCAGGATGC TATAAAATCACCACGGTCTTTAGCCATGCACAAACGGTAGTTTTGTGTGTTGGCTGCTCC ACTGTCCTCTGCCAGCCTACAGGAGGAAAAGCAAGGCTTACAGAAGGATGTTCCTTCAGG AGGAAGCAGCACTAA	MPLAKDLLHPSPEEEKRKHKKKRLVQSPNSYFMDVKCPGCYKITTVFSHAQTVVLCVGCS TVLCQPTGGKARLTEGCSFRRKQH
human	Homo sapiens	2	GRCh38:CM000663.2	96.429	1 to 84	y	human	2	human_2	RPS27L-201	ENSP00000331019	ATGCCTTTGGCTAGAGATTTACTACATCCGTCCTTGGAAGAGGAAAAGAAAAAACATAAA AAGAAACGCCTAGTACAAAGTCCAAATTCTTACTTTATGGATGTAAAATGTCCAGGTTGC TACAAGATCACCACGGTTTTCAGCCATGCTCAGACAGTGGTTCTTTGTGTAGGTTGTTCA ACAGTGTTGTGCCAGCCTACAGGAGGAAAGGCCAGACTCACAGAAGGGTGTTCATTTAGA AGAAAGCAACACTAA	MPLARDLLHPSLEEEKKKHKKKRLVQSPNSYFMDVKCPGCYKITTVFSHAQTVVLCVGCS TVLCQPTGGKARLTEGCSFRRKQH
gar	Lepisosteus oculatus	3	LepOcu1	100	1 to 84	y	gar	1	gar_1	XM_015368815.1:1-375	XP_015224301.1	ATGCCACTCGCGAAAGACTT GTTGCACCCGTCCCCCGAGGAGGAGAAGAGGAAGCACAAGAAGAAGAGGCTGGTCCAGAGCCCCAACTCC TACTTCATGGATGTCAAGTGTCCAGGATGCTACAAGATCACCACGGTGTTCAGCCACGCGCAGACAGTGG TGCTGTGTGTGGGCTGCTCCACAGTGCTGTGCCAGCCCACGGGAGGGAAGGCCCGGCTGACAGAAGGCTG TTCGTTCCGGAGGAAGCAGCACTAG	MPLAKDLLHPSPEEEKRKHKKKRLVQSPNSYFMDVKCPGCYKITTVFSHAQTVVLCVGCSTVLCQPTGGKARLTEGCSFRRKQH	XP_015224301.1 has an extension N-terminal to the MPLAK that lacks a start codon, therefore truncating it. Kuang reported 2: XP_015198893,XP_006640051
gar	Lepisosteus oculatus	3	LepOcu1	97.62	1 to 84	y	gar	2	gar_2	XM_015343407.1:93-347	XP_015198893.1	ATGCCTCTGGCCAAAGACTTACTGCACCCCTCTCTTGAGGAAGAGAAAAGACAGCATAAGAAAAAACGAC TGGTGCAGAGCCCCAATTCCTACTTCATGGATGTGAAATGTCCAGGTTGCTATAAGATCACTACTGTGTT CAGTCATGCCCAGACAGTGGTCCTGTGTGTTGGCTGCTCAACAGTCCTGTGTCAGCCTACAGGAGGGAAA GCCAGGCTCACAGAGGGTTGTTCTTTCAGAAGAAAGCAGCATTAA	MPLAKDLLHPSLEEEKRQHKKKRLVQSPNSYFMDVKCPGCYKITTVFSHAQTVVLCVGCSTVLCQPTGGK ARLTEGCSFRRKQH
gar	Lepisosteus oculatus	3	LepOcu1	84.52	1 to 84	y	gar	3	gar_3	XM_006639988.2:122-376	XP_006640051.1	ATGCCGCTCGCCACCGACCTGATGCACCCCCTCTACGAGGTGGAGAAGAGGAGGCACAAGAAGAAGAGAC TGGTGCAGAGCCCCAACTCCTACTTCATGGACGTCAAGTGTCCAGGCTGCTACAGGATCACCACGGTGTT CAGCCACGCACAGAGAGTGGTGCCCTGCGCTGGGTGCTCCTACGTCCTGTGTCAACCCAAAGGAGGAAAG TGCCGCCTGACAGAAGGCTGCTCGTTCAGGAGAAAGCAACACTGA	MPLATDLMHPLYEVEKRRHKKKRLVQSPNSYFMDVKCPGCYRITTVFSHAQRVVPCAGCSYVLCQPKGGK CRLTEGCSFRRKQH
zebrafish	Danio rerio	3	GRCz11	96.429	1 to 84	y	zebrafish	2	zebrafish_2	rps27.1-201	ENSDARP00000029079	ATGCCACTCGCAAAAGACTTGCTGCACCCGACCCCTGAAGAAGAGAGGAGGAGGCACAAG AAGAAGCGTCTCGTACAGAGCCCCAACTCTTATTTCATGGATGTCAAATGTCCAGGATGT TATAAGATCACAACGGTGTTCAGCCATGCACAGACAGTGGTGCTTTGTGTCGGTTGCTCG ACTGTGCTGTGTCAGCCCACTGGAGGCAAAGCTCGCCTCACAGAAGGGTGTTCCTTCAGA AGGAAGCAGCATTAA	MPLAKDLLHPTPEEERRRHKKKRLVQSPNSYFMDVKCPGCYKITTVFSHAQTVVLCVGCS TVLCQPTGGKARLTEGCSFRRKQH	Manchado et al 2007 does not report a 3rd S27 paralog in D. rerio, and Kuang et al 2020 also reports only 2 Kuang et al 2020 reports 2: NP_001153000,NP_957059
zebrafish	Danio rerio	3	GRCz11	90.476	1 to 84	y	zebrafish	3	zebrafish_3	rps27l-201	ENSDARP00000140190	ATGCCTTTGGCCAGAGATTTGATCAACCCGTCCTTTGATTTGGAGAGGAGGCAGCACAAG AAGAAGAGGCTTGTTCAGAGTCCAAACTCATACTTCATGGATGTAAAATGTCCAGGCTGT TATAAGATCACGACGGTGTTCAGTCACGCGCAGACGGTGGTCCTGTGTGTCGGTTGTTCA ACAGTGCTCTGCCAGCCCACAGGAGGAAAAGCAAGACTCACTGAGGGTTGCTCTTTCAGA AGAAAGCAGCACTGA	MPLARDLINPSFDLERRQHKKKRLVQSPNSYFMDVKCPGCYKITTVFSHAQTVVLCVGCS TVLCQPTGGKARLTEGCSFRRKQH
zebrafish	Danio rerio	3	GRCz11	97.619	1 to 84	y	zebrafish	1	zebrafish_1	rps27.2-201	ENSDARP00000072300	ATGCCTCTCGCGAAGGATTTGTTGCACCCGACGCCAGAGGAGGAGAAGAGAAGACACAAG AAGAAGCGTCTCGTACAGAGTCCCAACTCTTATTTTATGGATGTCAAATGCCCAGGCTGT TATAAGATCACTACCGTGTTCAGTCACGCACAGACGGTGGTCTTGTGTGTAGGATGCTCC ACTGTTCTCTGCCAGCCCACTGGAGGAAAGGCTCGCCTCACAGAAGGATGCTCGTTCAGA AGAAAGCAGCACTAG	MPLAKDLLHPTPEEEKRRHKKKRLVQSPNSYFMDVKCPGCYKITTVFSHAQTVVLCVGCS TVLCQPTGGKARLTEGCSFRRKQH
carp	Cyprinus carpio	6	Cypcar_WagV4.0	97.62	1 to 84	n	carp	1	carp_1	RNASEQT00002984223.1	RNASEQP00002984223	ATGCCTCTCGCGAAGGACTTGTTGCACCCAACGCCAGAGGAGGAGAAGAGAAGACACAAG AAGAAGCGTCTCGTACAGAGTCCCAACTCTTATTTTATGGATGTCAAATGCCCAGGCTGT TATAAGATCACTACGGTGTTTAGTCACGCACAGACAGTGGTCTTATGTGTAGGATGCTCT ACAGTACTGTGCCAGCCCACCGGAGGAAAGGCGCGCCTCACAGAAGGATGCTCGTTCAGG AGAAAGCAGCACTAG	MPLAKDLLHPTPEEEKRRHKKKRLVQSPNSYFMDVKCPGCYKITTVFSHAQTVVLCVGCS TVLCQPTGGKARLTEGCSFRRKQH	Kuang et al 2020 found no copies
carp	Cyprinus carpio	6	Cypcar_WagV4.0	95.24	1 to 84	n	carp	2	carp_2	RNASEQT00005051869.1	RNASEQP00005051869	ATGCCACTCGCAAAAGACTTGCTGCACCCGACCCCAGAGGAAGAGAGGAGGACGCACAAG AAGAAGCGTCTCGTACAGTGCCCCAATTCTTATTTCATGGATGTCAAGTGTCCAGGATGT TATAAGATCACAACGGTGTTCAGTCACGCACAGACGGTCGTGCTTTGCGTGGGCTGCTCA ACTGTGCTGTGTCAGCCCACCGGAGGCAAAGCTCGGCTCACAGAAGGGTGTTCTTTCAGA AGGAAGCAGCATTAA	MPLAKDLLHPTPEEERRTHKKKRLVQCPNSYFMDVKCPGCYKITTVFSHAQTVVLCVGCS TVLCQPTGGKARLTEGCSFRRKQH
carp	Cyprinus carpio	6	Cypcar_WagV4.0	95.24	1 to 84	n	carp	4	carp_4	RNASEQT00005231991.1	RNASEQP00005231991	ATGCCACTCGCAAAAGACTTGCTGCATCCGACCCCTGAGGAGGAGAGGAGGACGCACAAG AAGAAGCGTCTCGTACAGTGTCCCAATTCTTATTTCATGGACGTCAAGTGTCCAGGATGT TATAAGATCACAACGGTGTTCAGCCACGCGCAGACGGTCGTGCTTTGTGTCGGTTGCTCG ACTGTGCTGTGTCAGCCCACCGGAGGCAAAGCTCGGCTCACAGAAGGGTGTTCCTTCAGA AGGAAGCAGCATTAA	MPLAKDLLHPTPEEERRTHKKKRLVQCPNSYFMDVKCPGCYKITTVFSHAQTVVLCVGCS TVLCQPTGGKARLTEGCSFRRKQH
carp	Cyprinus carpio	6	Cypcar_WagV4.0	92.857	1 to 84	y	carp	5	carp_5	rps27l-201	ENSCCRP00000156196	ATGCCTCTGGCCAAAGATCTGCTGAACCCGTCCTTTGAT TTTGAAAGAAGACAGCATAAGAAGAAAAGGCTTGTGCAGAGTCCCAACTCGTACTTCATG GATGTAAAATGCCCAGGTTGTTATAAGATCACGACTGTGTTCAGTCATGCGCAGACGGTT GTGTTGTGCGTTGGGTGTTCAACAGTGCTCTGCCAGCCCACTGGAGGAAAAGCAAGGCTG ACTGAGGGTTGTTCTTTCAGAAGAAAGCAGCACTGA	MPLAKDLLNPSFD FERRQHKKKRLVQSPNSYFMDVKCPGCYKITTVFSHAQTVVLCVGCSTVLCQPTGGKARL TEGCSFRRKQH	Truncated N term extension
carp	Cyprinus carpio	6	Cypcar_WagV4.0	91.67	1 to 84	n	carp	6	carp_6	RNASEQT00004944063.1	RNASEQP00004944063	ATGCCTCTGGCCAAAGATCTGCTGAACCCGTCCTTTGATTTTGAGAGAAGGCAGCATAAG AAGAAAAGGCTTGTGCAGAGTCCCAACTCGTACTTCATGGATGTGAAATGCCCAGGTTGT TATAAGATCACGACTGTGTTCAGTCATGCGCAGACGGTGGTGTTGTGCGTTGGGTGTTCA ACAGTGCTCTGCCAGCCCACAGGAGGAAAAGCAAGGCTGACCGAGGTTTGTTCTTTCAGA AGAAAGCAGCACTGA	MPLAKDLLNPSFDFERRQHKKKRLVQSPNSYFMDVKCPGCYKITTVFSHAQTVVLCVGCS TVLCQPTGGKARLTEVCSFRRKQH
carp	Cyprinus carpio	6	Cypcar_WagV4.0	95.24	1 to 84	n	carp	3	carp_3	RNASEQT00005368061.1	RNASEQP00005368061	ATGCCTCTCGCGAAGGACTTACTGCTCCCAACGCCAGAGGAGGAGAGGAGAAGACACAAG AAGAAGCGTCTCGTACAGAGTCCCAACTCTTATTTTATGGATGTCAAATGCCCAGGCTGT TATAAGATCACTACAGTGTTCAGTCACGCACAGACGGTGGTCTTATGTGTAGGATGCTCT ACAGTACTGTGCCAGCCCACCGGAGGAAAGGCGCGCCTCACAGAAGGATGCTCGTTCAGG AGAAAGCAGCACTAG	MPLAKDLLLPTPEEERRRHKKKRLVQSPNSYFMDVKCPGCYKITTVFSHAQTVVLCVGCS TVLCQPTGGKARLTEGCSFRRKQH
pufferfish	Tetraodon nigroviridis	2	TETRAODON8	96.429	1 to 84	y	pufferfish	1	pufferfish_1	ENSTNIT00000020928.1	ENSTNIP00000020695	ATGCCACTCGCAAAAGACTTGTTGCACCCATCCCCTGAGGAGGAGAAGAGGAGGCACAAG AAGAAGCGTCTTGTTCAGAGTCCTAACTCTTATTTTATGGATGTGAAATGTCCAGGCTGC TACAAGATCACAACAGTGTTCAGCCATGCTCAGACAGTTGTGCTGTGTGTTGGTTGTTCA ACGGTCCTGTGTCAGCCCACTGGAGGCAAAGCACGTCTCACAGAGGGGTGCTCATTCAGG AGGGAGCGGACCGGTTGA	MPLAKDLLHPSPEEEKRRHKKKRLVQSPNSYFMDVKCPGCYKITTVFSHAQTVVLCVGCS TVLCQPTGGKARLTEGCSFRRERTG
pufferfish	Tetraodon nigroviridis	2	TETRAODON8	88.095	1 to 84	y	pufferfish	2	pufferfish_2	rps27l-201	ENSTNIP00000011235	ATGCCTCTGGCCAAAGATCTCCTTCATCCAACTATTGACATTGAGAGAAGGCAACATAAA AAGAAGAGGCTCGTTCAAGCTCCCAATTCCTACTTTATGGACGTGAAGTGCCCCGGGTGC TACAAGATCACCACCGTGTTCAGCCATGCACAGACAGTGGTCCTCTGTGTGGGATGCTCC ACTGTGCTGTGCCAGCCAAAAGGAGGAAAGGCCAGGCTGACCGAAGGTTGTTCCTTCAGG AAGAAGCTACACTAA	MPLAKDLLHPTIDIERRQHKKKRLVQAPNSYFMDVKCPGCYKITTVFSHAQTVVLCVGCS TVLCQPKGGKARLTEGCSFRKKLH
tilapia	Oreochromis niloticus	4	O_niloticus_UMD_NMBU	96.429	1 to 84	y	tilapia	2	tilapia_2	ENSONIT00000048060.1	ENSONIP00000074241	ATGCCTCTCGCAAAGGATCTTTTGCACCCAACCCCCGAGCAGGAAAAGAGGCGACACAAG AAAAAGCGTCTTGTTCAGAGTCCTAACTCCTATTTTATGGATGTCAAGTGTCCAGGGTGC TACAAGATCACCACAGTCTTCAGTCATGCTCAGACTGTAGTTCTGTGTGTCGGCTGCTCC ACGGTCCTGTGCCAGCCGACAGGAGGGAAAGCTCGCCTGACAGAAGGATGCTCATTCAGG AGGAAACAGCACTAA	MPLAKDLLHPTPEQEKRRHKKKRLVQSPNSYFMDVKCPGCYKITTVFSHAQTVVLCVGCS TVLCQPTGGKARLTEGCSFRRKQH	Kuang et al 2020 found 4 copies on chr 11, 22, 7, 23, same as these (XP_003450940,XP_003440483,XP_003439891,XP_003452490)
tilapia	Oreochromis niloticus	4	O_niloticus_UMD_NMBU	98.81	1 to 84	y	tilapia	1	tilapia_1	XM_003452442.4:141-395	XP_003452490.1	ATGCCACTCGCAAAAGACTTGTTGCACCCATCCCCTGAGGAGGAGAAGAGGAGGCACAAGAAGAAGCGTC TTGTTCAGAGTCCTAACTCTTACTTCATGGATGTAAAATGTCCAGGATGCTACAAGATCACGACGGTGTT CAGCCATGCTCAGACAGTCGTGCTGTGTGTGGGCTGCTCTACAGTCCTGTGTCAGCCCACCGGAGGCAAA GCACGTCTCACAGAGGGGTGCTCATTCAGGAGGAAGCAGCACTAG	MPLAKDLLHPSPEEEKRRHKKKRLVQSPNSYFMDVKCPGCYKITTVFSHAQTVVLCVGCSTVLCQPTGGK ARLTEGCSFRRKQH
tilapia	Oreochromis niloticus	4	O_niloticus_UMD_NMBU	75.9	1 to 83	y	tilapia	4	tilapia_4	XM_003439843.5:150-404	XP_003439891.1	ATGTCTCTGGCTAAGGATCTGATGCACCCAAGTTTTGCAGAGGAGAGGAGGCAGCATAAGAAGAAGAGGC TGGTGCAGAATCCAAACTCTTACTTCATGGATGTTAAATGCATGGGGTGTTACAGGATCACCACCATCTT CAGCCATGCCCAGACAGTGGTGCCCTGCGCAGGCTGCTCTATAATCCTCTGTAGGCCACGAGGGGGGAAA TGCAGACTGACAGCAGGCTGCGCCTTCAGAAAGAAACAGACATGA	MSLAKDLMHPSFAEERRQHKKKRLVQNPNSYFMDVKCMGCYRITTIFSHAQTVVPCAGCSIILCRPRGGK CRLTAGCAFRKKQT
tilapia	Oreochromis niloticus	4	O_niloticus_UMD_NMBU	91.67	1 to 84	y	tilapia	3	tilapia_3	XM_003440435.4:95-349	XP_003440483.1	ATGCCTTTGGCCAGAGACCTTCTCCACCCGTCACTTGACCATGAGAGACGACAACATAAAAAGAAAAGAC TTGTTCAGAGTCCCAACTCCTACTTTATGGACGTGAAATGCCCAGGCTGCTACAAGATCACCACCGTGTT CAGTCATGCACAGACAGTGGTACTTTGTGTGGGATGCTCAACAGTGCTGTGCCAGCCCAAAGGAGGAAAG GCCAGACTAACAGAGGGTTGCTCTTTTAGGAGGAAGCAACATTAG	MPLARDLLHPSLDHERRQHKKKRLVQSPNSYFMDVKCPGCYKITTVFSHAQTVVLCVGCSTVLCQPKGGK ARLTEGCSFRRKQH
salmon	Salmo salar	6	Ssal_v3.1	96.429	1 to 84	y	salmon	2	salmon_2	XM_014142097.2:266-520	XP_013997572.1	ATGCCACTCGCAAAAGACTTGTTGCACCCATCCCCTGAGGAGGAGAAGAGGAGCCACAAGAAGAAGCGTC TCGTCCAGAGCCCTAACTCCTATTTCATGGATGTTAAGTGCCCAGGATGCTACAAGATCACAACTGTGTT CAGCCACGCCCAGACAGTCGTGCTGTGTGTGGGTTGCTCCACAGTTCTGTGTCAGCCCACTGGCGGCAAA GCACGTCTCACAGAGGGGTGCTCATTCAGGAGGAAGCAGCATTAG	MPLAKDLLHPSPEEEKRSHKKKRLVQSPNSYFMDVKCPGCYKITTVFSHAQTVVLCVGCSTVLCQPTGGK ARLTEGCSFRRKQH	Kuang found 8 copies: XP_014071705 (included here) XP_014057399 (no longer in annotation, similar locus to ENSSSAP...16685) XP_014004160 (similar locus as ENSSSAP...92942) XP_014044621 (no longer in annotation, was on an unplaced scaffold) XP_014057375 (similar locus as ENSSSAP00000141939) XP_014044683 (no longer in annotation, was on an unplaced scaffold) I also found XP_013997572，XP_014032385
salmon	Salmo salar	6	Ssal_v3.1	79.76	1 to 84	y	salmon	5	salmon_5	XM_014148686.2:191-445	XP_014004161.1	ATGGCGCTCACTAAGGACCTAATGCACCCTACTTTGGAGGCTGAGAGGCAAAGACACAAGAAGAAGAGGC TGGTTCAGAGTCCCAACTCCTACTTCATGGATGTAAAATGCCCTGGCTGCTACAGGATCACCACAGTGTT CAGTCATGCCCAGAGAGTGGTGCCCTGTGGCGGCTGCTCCTTCGTCCTGTGCCAGCCCAGAGGGGGGAAA TGCCGCCTCACGGAGGGCTGCTCCTTCAGAAGAAAGCAACGCTGA	MALTKDLMHPTLEAERQRHKKKRLVQSPNSYFMDVKCPGCYRITTVFSHAQRVVPCGGCSFVLCQPRGGK CRLTEGCSFRRKQR
salmon	Salmo salar	6	Ssal_v3.1	96.43	1 to 84	y	salmon	3	salmon_3	XM_045698986.1:100-354	XP_045554942.1	ATGCCACTCGCAAAGGACCTGTTGCACCCAACCTCCGAGGAGGAGAAGAGAAGTCACAAGAAGAAGCGTC TTGTACAGAGCCCTAACTCGTATTTTATGGATGTCAAATGTCCAGGATGCTATAAGATCACGACAGTGTT CAGTCACGCCCAGACGGTCGTGCTGTGTGTCGGATGCTCCACAGTCCTGTGTCAACCTACAGGGGGTAAA GCACGCCTCACAGAAGGATGCTCATTCAGGAGAAAACAGCACTAG	MPLAKDLLHPTSEEEKRSHKKKRLVQSPNSYFMDVKCPGCYKITTVFSHAQTVVLCVGCSTVLCQPTGGK ARLTEGCSFRRKQH
salmon	Salmo salar	6	Ssal_v3.1	97.62	1 to 84	y	salmon	1	salmon_1	XM_014176910.2:102-356	XP_014032385.1	ATGCCACTCGCAAAAGACTTGTTACACCCATCCCCTGATGAGGAGAAGAGGAGCCACAAGAAGAAGCGTC TTGTCCAGAGCCCAAACTCCTACTTCATGGATGTTAAGTGCCCAGGATGTTACAAGATCACAACGGTGTT CAGCCACGCCCAGACAGTTGTGCTGTGTGTGGGTTGCTCCACAGTTCTGTGTCAGCCCACTGGAGGCAAA GCACGTCTCACAGAGGGGTGCTCTTTCAGGAGGAAGCAGCATTAG	MPLAKDLLHPSPDEEKRSHKKKRLVQSPNSYFMDVKCPGCYKITTVFSHAQTVVLCVGCSTVLCQPTGGK ARLTEGCSFRRKQH
salmon	Salmo salar	6	Ssal_v3.1	92.405	1 to 79	y	salmon	4	salmon_4	rps27.2-203	ENSSSAP00000016685	ATGCCACTCGCAAAGGACCTGTTACACCCAACCTCTGAGGAGGAAAAGAGAAGTCACAAG AAGAAGCGTCTTGTACAGAGCCCTAACTCGTATTTTATGGATGTCAAATGTCCAGGATGC TATAAGATCACGACAGTGTTCAGTCACGCCCAGACGGTCGTGCTGTGTGTCGGATGCTCC ACAGTCCTGTGTCAACCTACAGGGGGTAAAGCACGCCTCACAGAAGTCTCACCATTTTCA ACCTGCAGATTGATGTGCCTCAGTGGTCTGACATTCACAGCAGCACCATGCAATGCACCT TGGACTGACGAAGCAGACACAGGAGGAATGTGTTAG	MPLAKDLLHPTSEEEKRSHKKKRLVQSPNSYFMDVKCPGCYKITTVFSHAQTVVLCVGCS TVLCQPTGGKARLTEVSPFSTCRLMCLSGLTFTAAPCNAPWTDEADTGGMC
salmon	Salmo salar	6	Ssal_v3.1	79.76	1 to 84	y	salmon	6	salmon_6	XM_014216230.2:284-538	XP_014071705.1	ATGTCGCTCGCTAAGGACCTAATGCACCCTACTTTGGTGGCTGAGAGGCAAAGACACAAGAAGAAGAGGT TGGTTCAGAGTCCCAACTCCTACTTCATGGATGTAAAATGCCCAGGCTGCTACAGGATCACCACAGTGTT CAGTCATGCCCAGAGAGTGGTGCCCTGTGGCGGCTGCTCCTTCATCCTGTGCCAGCCCAGAGGGGGGAAA TGTCGCCTCACTGAGGGCTGCTCGTTCAGAAGAAAGCAACACTGA	MSLAKDLMHPTLVAERQRHKKKRLVQSPNSYFMDVKCPGCYRITTVFSHAQRVVPCGGCSFILCQPRGGK CRLTEGCSFRRKQH
rabbit	Oryctolagus cuniculus	2	OryCun2.0	100	1 to 84	y	rabbit	1	rabbit_1	ENSOCUT00000011789.3	ENSOCUP00000010135	ATGCCTCTCGCAAAGGATCTCCTGCATCCCTCTCCTGAAGAGGAGAAGAGGAAACACAAG AAGAAGCGCCTGGTGCAGAGCCCCAATTCCTACTTCATGGACGTGAAGTGCCCAGGATGC TATAAAATCACCACGGTTTTCAGCCATGCACAAACGGTAGTTTTGTGCGTTGGCTGCTCC ACTGTCCTCTGCCAGCCCACAGGAGGAAAAGCAAGGCTTACAGAAGGATGTTCCTTCAGG AGGAAGCAGCACTGA	MPLAKDLLHPSPEEEKRKHKKKRLVQSPNSYFMDVKCPGCYKITTVFSHAQTVVLCVGCS TVLCQPTGGKARLTEGCSFRRKQH	Human RPS27 has 3 orthologs in rabbit per Ensembl, but 2 are single-exon
rabbit	Oryctolagus cuniculus	2	OryCun2.0	96.429	1 to 84	y	rabbit	2	rabbit_2	RPS27L-201	ENSOCUP00000040419	ATGCCCTTGGCTAGAGATTTACTCCATCCCTCTTTGGAGGAGGAAAAGAAGAAACATAAA AAGAAACGGCTAGTTCAAAGTCCGAATTCTTATTTTATGGACGTAAAATGCCCAGGTTGC TACAAGATCACCACGGTTTTCAGCCATGCCCAAACAGTGGTTCTTTGTGTAGGCTGTTCT ACAGTTTTGTGCCAGCCTACAGGAGGGAAGGCCCGACTCACAGAAGGCTGTTCCTTTAGA AGAAAGCAACACTAG	MPLARDLLHPSLEEEKKKHKKKRLVQSPNSYFMDVKCPGCYKITTVFSHAQTVVLCVGCS TVLCQPTGGKARLTEGCSFRRKQH
orangutan	Pongo abelii	2	Susie_PABv2	100	1 to 84	y	orangutan	1	orangutan_1	RPS27-201	ENSPPYP00000000924	ATGCCTCTCGCAAAGGATCTCCTTCATCCCTCTCCAGAAGAGGAGAAGAGGAAACACAAG AAGAAACGCCTGGTGCAGAGCCCCAATTCCTACTTCATGGATGTGAAATGCCCAGGATGC TATAAAATCACCACGGTCTTTAGCCATGCACAAACGGTAGTTTTGTGTGTTGGCTGCTCC ACTGTCCTCTGCCAGCCTACAGGAGGAAAAGCAAGGCTTACAGAAGGATGTTCCTTCAGG AGGAAGCAGCACTAA	MPLAKDLLHPSPEEEKRKHKKKRLVQSPNSYFMDVKCPGCYKITTVFSHAQTVVLCVGCS TVLCQPTGGKARLTEGCSFRRKQH	Human S27 has 3 orthologs in orangutan per Ensembl, but all 3 are single-exon
orangutan	Pongo abelii	2	Susie_PABv2	96.429	1 to 84	y	orangutan	2	orangutan_2	ENSPPYT00000007719.3	ENSPPYP00000007415	ATGCCTTTGGCTAGAGATTTACTACATCCGTCCTTGGAAGAGGAAAAGAAAAAACATAAA AAGAAACGCCTAGTACAAAGTCCAAATTCTTACTTTATGGATGTAAAATGTCCAGGTTGC TACAAGATCACCACGGTTTTCAGCCATGCTCAGACAGTGGTTCTTTGTGTAGGTTGTTCA ACAGTGTTGTGCCAGCCTACAGGAGGAAAGGCCAGACTCACAGAAGGGTGTTCATTTAGA AGAAAGCAACACTAA	MPLARDLLHPSLEEEKKKHKKKRLVQSPNSYFMDVKCPGCYKITTVFSHAQTVVLCVGCS TVLCQPTGGKARLTEGCSFRRKQH
dog	Canis lupus familiaris	2	ROS_Cfam_1.0	100	1 to 84	y	dog	1	dog_1	RPS27-201	ENSCAFP00845022696	ATGCCCCTTGCGAAGGATCTCCTGCACCCGTCCCCGGAAGAGGAGAAGAGGAAGCACAAG AAGAAGCGCCTGGTGCAGAGCCCCAACTCCTACTTCATGGACGTTAAGTGCCCGGGATGC TACAAAATCACCACCGTCTTCAGCCACGCACAGACGGTAGTTCTGTGTGTCGGCTGTTCT ACTGTCCTCTGCCAGCCCACGGGAGGAAAAGCAAGGCTTACAGAAGGATGCTCCTTCAGG CGGAAGCAGCACTAA	MPLAKDLLHPSPEEEKRKHKKKRLVQSPNSYFMDVKCPGCYKITTVFSHAQTVVLCVGCS TVLCQPTGGKARLTEGCSFRRKQH	Possibly a third paralog (ENSCAFP00845034896) but low similarity/coverage and exon structure differs
dog	Canis lupus familiaris	2	ROS_Cfam_1.0	96.429	1 to 84	y	dog	2	dog_2	RPS27L-201	ENSCAFP00845028223	ATGCCTCTGGCTAGAGATTTGCTACATCCGTCCTTGGAAGAGGAAAAGAAAAAGCATAAA AAGAAACGGCTAGTTCAAAGCCCAAATTCCTATTTTATGGATGTAAAATGTCCAGGTTGC TACAAGATCACCACGGTTTTCAGCCATGCCCAGACGGTGGTTCTTTGTGTAGGCTGTTCA ACCGTGTTGTGCCAGCCGACGGGAGGAAAGGCCAGACTCACAGAGGGCTGTTCATTTAGA AGAAAGCAACACTAA	MPLARDLLHPSLEEEKKKHKKKRLVQSPNSYFMDVKCPGCYKITTVFSHAQTVVLCVGCS TVLCQPTGGKARLTEGCSFRRKQH
