# Supplementary material for: Subfunctionalized expression drives evolutionary retention of ribosomal protein paralogs Rps27 and Rps27l in vertebrates
Source: eLife. 2023 Jun 12;12:e78695. doi: 10.7554/eLife.78695 (PMC10313321; doi:10.7554/eLife.78695)
Supplement: Supplementary file 2. [file elife-78695-supp2.xlsx]

## Sheet: Sheet1
gene_name	ensembl_id	spearman_rho	p-value
Rps27l	ENSMUSG00000036781	0.788767	2.76e-23
Csn2	ENSMUSG00000063157	0.632857	5.7e-13
Scd1	ENSMUSG00000037071	0.58147	9.65e-11
Wap	ENSMUSG00000000381	0.559471	6.68e-10
Orm1	ENSMUSG00000039196	0.555333	9.46e-10
Cidea	ENSMUSG00000024526	0.550855	1.37e-09
Csn1s1	ENSMUSG00000070702	0.548223	1.7e-09
Csn1s2a	ENSMUSG00000061937	0.527739	8.58e-09
Csn3	ENSMUSG00000001622	0.516396	2.01e-08
Lao1	ENSMUSG00000024903	0.508194	3.65e-08
Fasn	ENSMUSG00000025153	0.499094	6.94e-08
Folr1	ENSMUSG00000001827	0.492173	1.12e-07
Fabp3	ENSMUSG00000028773	0.490022	1.29e-07
Trf	ENSMUSG00000032554	0.482422	2.15e-07
Lpl	ENSMUSG00000015568	0.469149	5.08e-07
Fkbp11	ENSMUSG00000003355	0.468401	5.32e-07
Lalba	ENSMUSG00000022991	0.45413	1.28e-06
Sftpd	ENSMUSG00000021795	0.453459	1.34e-06
St6gal1	ENSMUSG00000022885	0.453182	1.36e-06
Qsox1	ENSMUSG00000033684	0.442976	2.49e-06
Wfdc3	ENSMUSG00000076434	0.437582	3.4e-06
Serp1	ENSMUSG00000027808	0.435355	3.86e-06
Muc1	ENSMUSG00000042784	0.43365	4.25e-06
Glycam1	ENSMUSG00000022491	0.426808	6.24e-06
Cel	ENSMUSG00000026818	0.422364	7.97e-06
Smim22	ENSMUSG00000096215	0.417656	1.03e-05
Chrdl2	ENSMUSG00000030732	0.414199	1.24e-05
Orai1	ENSMUSG00000049686	0.413182	1.31e-05
Tc2n	ENSMUSG00000021187	0.411707	1.41e-05
Gale	ENSMUSG00000028671	0.409646	1.57e-05
Plin2	ENSMUSG00000028494	0.400854	2.48e-05
1700012B07Rik	ENSMUSG00000020617	0.399088	2.71e-05
Acsl1	ENSMUSG00000018796	0.395825	3.2e-05
Cldn4	ENSMUSG00000047501	0.394034	3.5e-05
Slc25a10	ENSMUSG00000025792	0.386111	5.16e-05
Wfdc18	ENSMUSG00000000983	0.386103	5.16e-05
Muc15	ENSMUSG00000050808	0.385754	5.25e-05
Csn1s2b	ENSMUSG00000061388	0.385749	5.25e-05
Cldn3	ENSMUSG00000070473	0.38486	5.49e-05
Spp1	ENSMUSG00000029304	0.383005	6e-05
Il15	ENSMUSG00000031712	0.382231	6.23e-05
Cytip	ENSMUSG00000026832	0.379823	6.99e-05
Abhd11os	ENSMUSG00000085042	0.378952	7.28e-05
Ssr4	ENSMUSG00000002014	0.377957	7.63e-05
B4galt1	ENSMUSG00000028413	0.37645	8.2e-05
Fam20c	ENSMUSG00000025854	0.374012	9.19e-05
Insig1	ENSMUSG00000045294	0.37378	9.29e-05
Btn1a1	ENSMUSG00000000706	0.373622	9.36e-05
Sec11c	ENSMUSG00000024516	0.372835	9.71e-05
Slc34a2	ENSMUSG00000029188	0.370827	0.00010658
Abcg2	ENSMUSG00000029802	0.367809	0.00012246
Fam20a	ENSMUSG00000020614	0.363449	0.00014931
Cd82	ENSMUSG00000027215	0.362076	0.00015884
Olah	ENSMUSG00000026645	0.360941	0.00016714
Gmppb	ENSMUSG00000070284	0.359584	0.00017759
Pip	ENSMUSG00000058499	0.35898	0.00018243
Slc28a3	ENSMUSG00000021553	0.358948	0.00018269
Cmtm6	ENSMUSG00000032434	0.358677	0.0001849
Elf5	ENSMUSG00000027186	0.358577	0.00018573
Tnfsf13os	ENSMUSG00000085890	0.356697	0.00020186
Plet1	ENSMUSG00000032068	0.356634	0.00020242
Tspan8	ENSMUSG00000034127	0.356454	0.00020403
Adig	ENSMUSG00000044405	0.355764	0.00021034
Yif1a	ENSMUSG00000024875	0.355481	0.00021297
Cldn7	ENSMUSG00000018569	0.352864	0.00023884
Nupr1	ENSMUSG00000030717	0.351004	0.00025895
Ltf	ENSMUSG00000032496	0.350088	0.00026943
Cd320	ENSMUSG00000002308	0.347438	0.00030195
Prrg4	ENSMUSG00000027171	0.346349	0.00031634
Ccdc167	ENSMUSG00000024018	0.344547	0.00034156
Dab2	ENSMUSG00000022150	0.339575	0.00042103
Gm12863	ENSMUSG00000073765	0.339471	0.00042286
Clcn3	ENSMUSG00000004319	0.336869	0.00047112
Xbp1	ENSMUSG00000020484	0.336036	0.00048761
Xdh	ENSMUSG00000024066	0.335975	0.00048883
Tmem238	ENSMUSG00000030431	0.335401	0.00050053
Marveld2	ENSMUSG00000021636	0.334997	0.00050891
Crabp2	ENSMUSG00000004885	0.333887	0.0005326
Atp5o	ENSMUSG00000022956	0.333427	0.00054272
Thrsp	ENSMUSG00000035686	0.33228	0.00056873
Zbtb7b	ENSMUSG00000028042	0.326391	0.00072112
Pigr	ENSMUSG00000026417	0.326389	0.00072119
Snd1	ENSMUSG00000001424	0.324644	0.00077304
Prss8	ENSMUSG00000030800	0.323512	0.00080849
Epcam	ENSMUSG00000045394	0.315448	0.00110717
Gk	ENSMUSG00000025059	0.315283	0.00111424
Fabp3-ps1	ENSMUSG00000056366	0.315208	0.00111744
BC016548	ENSMUSG00000070794	0.313436	0.00119594
Sec23b	ENSMUSG00000027429	0.313187	0.00120738
Igfals	ENSMUSG00000046070	0.312345	0.00124671
Cldn8	ENSMUSG00000050520	0.311855	0.00127017
Nans	ENSMUSG00000028334	0.31062	0.00133106
Tfrc	ENSMUSG00000022797	0.309206	0.00140398
Sapcd2	ENSMUSG00000026955	0.30897	0.0014165
2610528J11Rik	ENSMUSG00000028536	0.308626	0.00143496
Ccl28	ENSMUSG00000074715	0.307043	0.00152262
Nhp2	ENSMUSG00000001056	0.305436	0.00161655
Cmtm8	ENSMUSG00000041012	0.303987	0.00170572
Pvrl2	ENSMUSG00000062300	0.30218	0.00182317
Fam13a	ENSMUSG00000037709	0.301835	0.00184644
Tkt	ENSMUSG00000021957	0.299008	0.0020472
Osbpl7	ENSMUSG00000038534	0.298305	0.00210004
Slc39a11	ENSMUSG00000041654	0.298253	0.00210402
Lcn2	ENSMUSG00000026822	0.297552	0.00215808
Nme1	ENSMUSG00000037601	0.295577	0.00231718
Pcx	ENSMUSG00000024892	0.295348	0.00233631
Ssr2	ENSMUSG00000041355	0.294486	0.00240957
Ceacam1	ENSMUSG00000074272	0.29408	0.00244474
Fen1	ENSMUSG00000024742	0.292001	0.00263251
Acly	ENSMUSG00000020917	0.291389	0.00269017
H2afj	ENSMUSG00000060032	0.290728	0.00275368
Ormdl2	ENSMUSG00000025353	0.288867	0.00293995
Mocs1	ENSMUSG00000064120	0.288028	0.00302764
Me1	ENSMUSG00000032418	0.287973	0.00303343
Rogdi	ENSMUSG00000022540	0.287816	0.00305015
Vrk3	ENSMUSG00000002205	0.286285	0.00321713
Svip	ENSMUSG00000074093	0.286149	0.00323245
Bspry	ENSMUSG00000028392	0.285135	0.00334799
Tmem128	ENSMUSG00000067365	0.28379	0.0035071
Gjb1	ENSMUSG00000047797	0.283082	0.00359351
Tmed3	ENSMUSG00000032353	0.281469	0.00379767
Slc15a2	ENSMUSG00000022899	0.280689	0.00389993
Lrg1	ENSMUSG00000037095	0.279174	0.00410585
Fam195a	ENSMUSG00000025732	0.278973	0.00413394
Nucb2	ENSMUSG00000030659	0.278741	0.00416644
Atp5g1	ENSMUSG00000006057	0.278564	0.00419151
Krtcap2	ENSMUSG00000042747	0.278032	0.00426743
Tmem144	ENSMUSG00000027956	0.277578	0.00433325
Cs	ENSMUSG00000005683	0.277012	0.00441662
Fads1	ENSMUSG00000010663	0.276819	0.0044453
Smox	ENSMUSG00000027333	0.276434	0.00450314
Thyn1	ENSMUSG00000035443	0.275263	0.004683
Rab11fip1	ENSMUSG00000031488	0.274454	0.00481105
Arhgef38	ENSMUSG00000040969	0.274343	0.00482891
Kcnk5	ENSMUSG00000023243	0.273829	0.00491216
Lbp	ENSMUSG00000016024	0.271886	0.00523842
Kcnn4	ENSMUSG00000054342	0.271508	0.00530416
Polr2i	ENSMUSG00000019738	0.27091	0.00540955
Trim46	ENSMUSG00000042766	0.270809	0.00542763
Ceacam10	ENSMUSG00000054169	0.270254	0.00552725
Ddx39	ENSMUSG00000005481	0.269985	0.00557623
Orm2	ENSMUSG00000061540	0.269488	0.0056678
Agfg1	ENSMUSG00000026159	0.269185	0.00572415
Apol7a	ENSMUSG00000010601	0.268579	0.00583855
Isg20	ENSMUSG00000039236	0.268266	0.00589834
Slc7a4	ENSMUSG00000022756	0.267457	0.00605547
Gm2a	ENSMUSG00000000594	0.265627	0.00642475
Ehf	ENSMUSG00000012350	0.265558	0.00643907
Rhpn2	ENSMUSG00000030494	0.265364	0.00647944
Gfpt1	ENSMUSG00000029992	0.263787	0.00681621
Mpv17l2	ENSMUSG00000035559	0.263467	0.0068862
Clu	ENSMUSG00000022037	0.262937	0.00700391
Yrdc	ENSMUSG00000028889	0.262304	0.00714667
Rasef	ENSMUSG00000043003	0.259435	0.00782683
Metrnl	ENSMUSG00000039208	0.259354	0.00784685
Tmem120b	ENSMUSG00000054434	0.2593	0.0078602
Naga	ENSMUSG00000022453	0.258368	0.00809399
C4b	ENSMUSG00000073418	0.256625	0.00854761
Vps37b	ENSMUSG00000066278	0.255778	0.00877618
Aldoc	ENSMUSG00000017390	0.255514	0.00884845
Sdf2l1	ENSMUSG00000022769	0.25499	0.00899362
Bod1	ENSMUSG00000044502	0.254794	0.00904833
Aldh18a1	ENSMUSG00000025007	0.254202	0.00921549
Otop1	ENSMUSG00000051596	0.254097	0.00924559
Ntn1	ENSMUSG00000020902	0.253239	0.00949342
Ndufv3	ENSMUSG00000024038	0.252881	0.00959858
Slc52a2	ENSMUSG00000022560	0.252794	0.00962423
Dctpp1	ENSMUSG00000042462	0.251532	0.0100041
Muc20	ENSMUSG00000035638	0.251294	0.0100773
Basp1	ENSMUSG00000045763	0.250563	0.0103047
Emc6	ENSMUSG00000047260	0.250442	0.0103428
Lig1	ENSMUSG00000056394	0.249875	0.0105229
Vps51	ENSMUSG00000024797	0.248592	0.0109407
Cck	ENSMUSG00000032532	0.248412	0.0110003
Rhov	ENSMUSG00000034226	0.247632	0.0112627
Tpd52l1	ENSMUSG00000000296	0.247056	0.0114596
Gjb2	ENSMUSG00000046352	0.246657	0.0115981
Fam46a	ENSMUSG00000032265	0.246041	0.0118146
Drd4	ENSMUSG00000025496	0.245848	0.0118828
Mvk	ENSMUSG00000041939	0.245758	0.0119151
Chchd10	ENSMUSG00000049422	0.244467	0.0123836
Tbc1d13	ENSMUSG00000039678	0.244304	0.0124437
Bckdha	ENSMUSG00000060376	0.244057	0.0125354
Crb3	ENSMUSG00000044279	0.243428	0.012772
Akt1	ENSMUSG00000001729	0.242651	0.0130697
Dcxr	ENSMUSG00000039450	0.242348	0.0131873
Krt18	ENSMUSG00000023043	0.241084	0.0136879
Got1	ENSMUSG00000025190	0.240936	0.0137477
Sec61b	ENSMUSG00000053317	0.24004	0.0141141
Bcat2	ENSMUSG00000030826	0.240035	0.014116
Ovol1	ENSMUSG00000024922	0.239466	0.0143532
Cd36	ENSMUSG00000002944	0.239086	0.0145133
Sfrp2	ENSMUSG00000027996	0.238986	0.014556
Znrf2	ENSMUSG00000058446	0.238488	0.0147687
Gorasp1	ENSMUSG00000032513	0.238349	0.0148287
Gm15635	ENSMUSG00000085095	0.238283	0.0148573
Fads2	ENSMUSG00000024665	0.237799	0.0150677
Pxmp4	ENSMUSG00000000876	0.237731	0.0150973
Cystm1	ENSMUSG00000046727	0.237679	0.01512
Fabp5	ENSMUSG00000027533	0.237263	0.0153039
Cgn	ENSMUSG00000068876	0.237226	0.0153203
Rars	ENSMUSG00000018848	0.237094	0.0153791
Hid1	ENSMUSG00000034586	0.236894	0.0154684
Mrps22	ENSMUSG00000032459	0.235739	0.0159928
Bsdc1	ENSMUSG00000040859	0.235197	0.0162442
Gpd1	ENSMUSG00000023019	0.235023	0.0163262
Kctd14	ENSMUSG00000051727	0.235012	0.0163311
Mrpl38	ENSMUSG00000020775	0.234971	0.0163502
Usp43	ENSMUSG00000020905	0.234733	0.0164623
Hip1r	ENSMUSG00000000915	0.23439	0.0166254
Slc22a1	ENSMUSG00000023829	0.234248	0.0166931
Sptbn2	ENSMUSG00000067889	0.234204	0.0167143
Steap3	ENSMUSG00000026389	0.234169	0.016731
Pkn1	ENSMUSG00000057672	0.233871	0.0168744
Prlr	ENSMUSG00000005268	0.233391	0.0171071
Susd3	ENSMUSG00000021384	0.233332	0.0171361
Mcm10	ENSMUSG00000026669	0.233191	0.0172054
BC016579	ENSMUSG00000033187	0.233167	0.0172169
Taldo1	ENSMUSG00000025503	0.233053	0.0172732
B4galnt1	ENSMUSG00000006731	0.232321	0.0176369
Rpl7l1	ENSMUSG00000063888	0.232236	0.0176796
Epb41l4b	ENSMUSG00000028434	0.231625	0.017989
Edn1	ENSMUSG00000021367	0.230731	0.0184506
Abhd5	ENSMUSG00000032540	0.230151	0.018755
Saa1	ENSMUSG00000074115	0.229458	0.0191247
Syne4	ENSMUSG00000019737	0.229374	0.0191698
Skint2	ENSMUSG00000034359	0.229279	0.0192211
Apod	ENSMUSG00000022548	0.227106	0.0204263
Wdr74	ENSMUSG00000042729	0.226701	0.0206577
Gne	ENSMUSG00000028479	0.226639	0.0206936
Sec14l2	ENSMUSG00000003585	0.226388	0.0208383
Liph	ENSMUSG00000044626	0.226313	0.0208821
Pus7l	ENSMUSG00000033356	0.226307	0.0208856
Wbscr25	ENSMUSG00000054909	0.226205	0.0209445
Ap1g1	ENSMUSG00000031731	0.226157	0.0209724
Mrs2	ENSMUSG00000021339	0.22583	0.0211638
Deaf1	ENSMUSG00000058886	0.225672	0.0212568
Scarb1	ENSMUSG00000037936	0.225209	0.0215306
Lpo	ENSMUSG00000009356	0.22479	0.0217818
Med29	ENSMUSG00000003444	0.224539	0.0219331
Ctsd	ENSMUSG00000007891	0.22442	0.0220049
Ggct	ENSMUSG00000002797	0.224285	0.0220871
Man1c1	ENSMUSG00000037306	0.224211	0.0221325
Ogfrl1	ENSMUSG00000026158	0.223752	0.0224136
Naa60	ENSMUSG00000005982	0.223657	0.0224726
Tle2	ENSMUSG00000034771	0.223459	0.0225947
Hk2	ENSMUSG00000000628	0.223117	0.0228079
Dmkn	ENSMUSG00000060962	0.222558	0.0231602
Taf6l	ENSMUSG00000003680	0.222514	0.0231879
Ccdc64b	ENSMUSG00000043782	0.222459	0.023223
Hint3	ENSMUSG00000019791	0.222046	0.0234869
Spcs3	ENSMUSG00000054408	0.221773	0.0236624
Tmem248	ENSMUSG00000053094	0.221724	0.023694
Pdcd4	ENSMUSG00000024975	0.221515	0.0238295
Pkp2	ENSMUSG00000041957	0.221503	0.023837
Cd14	ENSMUSG00000051439	0.220716	0.0243531
Mfge8	ENSMUSG00000030605	0.220674	0.0243814
Hsbp1l1	ENSMUSG00000078963	0.220537	0.024472
Pet100	ENSMUSG00000087687	0.22051	0.0244898
Trabd	ENSMUSG00000015363	0.220235	0.0246736
Slc16a12	ENSMUSG00000009378	0.219592	0.0251067
Pycard	ENSMUSG00000030793	0.219567	0.0251241
Wdr62	ENSMUSG00000037020	0.219378	0.0252529
mt-Co2	ENSMUSG00000064354	0.219243	0.0253449
Slc30a2	ENSMUSG00000028836	0.219159	0.0254021
Tmem110	ENSMUSG00000006526	0.218828	0.0256301
Rab26os	ENSMUSG00000093565	0.21808	0.0261521
Appl2	ENSMUSG00000020263	0.218059	0.0261668
Yipf6	ENSMUSG00000047694	0.21764	0.0264628
Sipa1l3	ENSMUSG00000030583	0.21762	0.0264769
Pex11g	ENSMUSG00000069633	0.217541	0.0265332
Arl14ep	ENSMUSG00000027122	0.216991	0.0269274
Col9a1	ENSMUSG00000026147	0.216649	0.0271746
Ppp1r15b	ENSMUSG00000046062	0.215975	0.027668
Sult1d1	ENSMUSG00000029273	0.215603	0.0279441
Uqcrq	ENSMUSG00000044894	0.215306	0.0281652
Lrp4	ENSMUSG00000027253	0.214668	0.0286466
Nr2c2ap	ENSMUSG00000071078	0.213896	0.0292389
Fbxl18	ENSMUSG00000066640	0.213502	0.0295448
1110008P14Rik	ENSMUSG00000039195	0.21337	0.0296473
Rpl41	ENSMUSG00000093674	0.213353	0.0296613
Wfdc17	ENSMUSG00000069792	0.213249	0.0297427
Mrpl57	ENSMUSG00000021967	0.213105	0.0298557
Mxd1	ENSMUSG00000001156	0.21283	0.030073
Atp2c1	ENSMUSG00000032570	0.212008	0.0307295
Abcb9	ENSMUSG00000029408	0.211759	0.0309308
Col1a1	ENSMUSG00000001506	0.211544	0.0311052
Mydgf	ENSMUSG00000019579	0.211346	0.0312669
Ddah1	ENSMUSG00000028194	0.211205	0.0313831
Ebp	ENSMUSG00000031168	0.210342	0.0320978
mt-Nd6	ENSMUSG00000064368	0.210095	0.0323051
Klk14	ENSMUSG00000044737	0.210004	0.0323817
Mal2	ENSMUSG00000024479	0.209771	0.0325788
BC030499	ENSMUSG00000037593	0.20969	0.0326472
Slc31a1	ENSMUSG00000066150	0.209627	0.0327009
Usp1	ENSMUSG00000028560	0.209275	0.0330013
Car5b	ENSMUSG00000031373	0.209208	0.0330588
Hist1h1d	ENSMUSG00000052565	0.209079	0.0331694
Trmt10a	ENSMUSG00000004127	0.208713	0.0334851
Acot1	ENSMUSG00000072949	0.208574	0.0336061
Tm2d3	ENSMUSG00000078681	0.208322	0.0338261
Gpt2	ENSMUSG00000031700	0.208311	0.0338355
Tmbim6	ENSMUSG00000023010	0.208306	0.0338398
Rbm47	ENSMUSG00000070780	0.208265	0.0338759
Snrnp35	ENSMUSG00000029402	0.208159	0.0339687
Gm3839	ENSMUSG00000097148	0.207865	0.0342278
Ubald1	ENSMUSG00000039568	0.207797	0.0342874
Nat10	ENSMUSG00000027185	0.207222	0.0347994
Bmf	ENSMUSG00000040093	0.207166	0.03485
Ndrg1	ENSMUSG00000005125	0.206825	0.0351564
Cebpzos	ENSMUSG00000062691	0.206799	0.0351798
Rsph3b	ENSMUSG00000023806	0.206577	0.0353813
Ltn1	ENSMUSG00000052299	0.206015	0.0358948
Edem1	ENSMUSG00000030104	0.20591	0.0359916
Hist2h4	ENSMUSG00000091405	0.205657	0.0362251
H2-Q1	ENSMUSG00000079507	0.20525	0.0366035
Mrpl40	ENSMUSG00000022706	0.203902	0.0378821
Ogfod2	ENSMUSG00000023707	0.203556	0.0382152
Slc19a2	ENSMUSG00000040918	0.203492	0.0382774
Tmem208	ENSMUSG00000014856	0.203409	0.0383583
Gm28077	ENSMUSG00000099715	0.203228	0.0385342
Agpat1	ENSMUSG00000034254	0.203204	0.0385583
Ddx56	ENSMUSG00000004393	0.202883	0.038872
Cln6	ENSMUSG00000032245	0.202543	0.0392076
Ttyh1	ENSMUSG00000030428	0.202363	0.039386
Phldb3	ENSMUSG00000074277	0.202308	0.0394405
Nme2	ENSMUSG00000020857	0.201847	0.0399015
Atp13a1	ENSMUSG00000031862	0.201707	0.040043
Gm26876	ENSMUSG00000097372	0.201612	0.0401385
Mars	ENSMUSG00000040354	0.200707	0.041061
Hn1	ENSMUSG00000020737	0.200319	0.0414613
Ldlrad4	ENSMUSG00000024544	0.199974	0.0418204
Zfp672	ENSMUSG00000049755	0.199928	0.0418686
Rgs20	ENSMUSG00000002459	0.198906	0.0429488
H13	ENSMUSG00000019188	0.198808	0.0430536
Snx8	ENSMUSG00000029560	0.198634	0.0432398
1810044D09Rik	ENSMUSG00000100680	0.198493	0.0433917
Gtf2ird2	ENSMUSG00000015942	0.198314	0.0435854
Mon1a	ENSMUSG00000032583	0.198306	0.0435939
Nipsnap3b	ENSMUSG00000015247	0.198207	0.0437008
Isoc2b	ENSMUSG00000052605	0.197804	0.044139
Tmem139	ENSMUSG00000071506	0.197793	0.0441515
Cisd2	ENSMUSG00000028165	0.197275	0.04472
Srebf1	ENSMUSG00000020538	0.197088	0.0449269
Pex12	ENSMUSG00000018733	0.196531	0.0455482
Cep85	ENSMUSG00000037443	0.196191	0.0459315
Ccdc34	ENSMUSG00000027160	0.196174	0.0459501
Klk10	ENSMUSG00000030693	0.196146	0.0459824
Ufsp1	ENSMUSG00000051502	0.196101	0.0460329
Tm7sf2	ENSMUSG00000024799	0.196101	0.0460329
Man2c1os	ENSMUSG00000086728	0.196053	0.0460873
Lipa	ENSMUSG00000024781	0.195936	0.0462204
Fam193b	ENSMUSG00000021495	0.195728	0.0464567
Unk	ENSMUSG00000020770	0.195464	0.0467582
Plcxd2	ENSMUSG00000087141	0.195367	0.0468691
Gucd1	ENSMUSG00000033416	0.194964	0.0473348
Mansc1	ENSMUSG00000032718	0.194861	0.0474535
Ddt	ENSMUSG00000001666	0.194637	0.0477149
Fam210b	ENSMUSG00000027495	0.19458	0.0477803
Slc46a3	ENSMUSG00000029650	0.194475	0.0479034
Nubp2	ENSMUSG00000039183	0.194403	0.0479876
Zfp952	ENSMUSG00000053390	0.194189	0.0482387
Nt5m	ENSMUSG00000032615	0.194189	0.0482389
Zfp87	ENSMUSG00000097333	0.194039	0.0484161
Dhrs1	ENSMUSG00000002332	0.193745	0.0487631
Naa40	ENSMUSG00000024764	0.193703	0.0488128
Saa2	ENSMUSG00000057465	0.1936	0.0489363
Ly6a	ENSMUSG00000075602	0.193542	0.0490054
Lrat	ENSMUSG00000028003	0.193343	0.0492427
Aqp9	ENSMUSG00000032204	0.193343	0.0492427
Aqp5	ENSMUSG00000044217	0.193255	0.0493482
Mettl6	ENSMUSG00000021891	0.193055	0.0495881
Pdhb	ENSMUSG00000021748	0.192816	0.0498763
Hist1h4h	ENSMUSG00000060981	0.192626	0.0501064
Atp2c2	ENSMUSG00000034112	0.192536	0.0502156
Lgals12	ENSMUSG00000024972	0.19229	0.0505154
Lmcd1	ENSMUSG00000057604	0.192232	0.0505866
Qdpr	ENSMUSG00000015806	0.192101	0.0507467
1700017B05Rik	ENSMUSG00000032300	0.191697	0.0512445
G0s2	ENSMUSG00000009633	0.191388	0.0516285
Lars2	ENSMUSG00000035202	0.191336	0.0516925
Gm26835	ENSMUSG00000097300	0.191123	0.0519587
Car2	ENSMUSG00000027562	0.191098	0.0519898
Lipe	ENSMUSG00000003123	0.191002	0.0521094
Lrrc59	ENSMUSG00000020869	0.190713	0.0524727
Klhl17	ENSMUSG00000078484	0.190607	0.052607
Jmjd8	ENSMUSG00000025736	0.190491	0.0527536
Stx19	ENSMUSG00000047854	0.190482	0.0527649
Adpgk	ENSMUSG00000025236	0.190251	0.0530579
Slc2a9	ENSMUSG00000005107	0.190086	0.0532681
Tmc6	ENSMUSG00000025572	0.189926	0.0534739
Pusl1	ENSMUSG00000051557	0.189518	0.0539981
Snhg20	ENSMUSG00000086859	0.189511	0.0540064
Gldc	ENSMUSG00000024827	0.189439	0.0541006
Sec16b	ENSMUSG00000026589	0.188749	0.0549975
1600002K03Rik	ENSMUSG00000035595	0.188623	0.055163
Bet1	ENSMUSG00000032757	0.188554	0.0552547
Cmas	ENSMUSG00000030282	0.188346	0.0555282
Ddit4	ENSMUSG00000020108	0.187838	0.0562023
Gfod2	ENSMUSG00000013150	0.187626	0.0564857
Mlycd	ENSMUSG00000074064	0.187511	0.0566405
Ttc37	ENSMUSG00000033991	0.18734	0.0568705
Abcf3	ENSMUSG00000003234	0.18728	0.0569513
Sfmbt1	ENSMUSG00000006527	0.186959	0.0573856
Camta2	ENSMUSG00000040712	0.186918	0.0574411
Fbxw8	ENSMUSG00000032867	0.186724	0.0577052
Cox6a1	ENSMUSG00000041697	0.186553	0.057938
Dbt	ENSMUSG00000000340	0.186514	0.0579918
Mettl5	ENSMUSG00000051730	0.186332	0.0582409
Hdhd2	ENSMUSG00000025421	0.186241	0.0583661
Xlr3a	ENSMUSG00000057836	0.186234	0.0583758
Rangap1	ENSMUSG00000022391	0.186211	0.0584077
Cracr2b	ENSMUSG00000048200	0.186086	0.0585798
Tatdn2	ENSMUSG00000056952	0.185864	0.0588874
Lncpint	ENSMUSG00000044471	0.185744	0.0590543
Dnaaf3	ENSMUSG00000055809	0.185712	0.0590983
Gmfg	ENSMUSG00000060791	0.185554	0.0593184
Cd3eap	ENSMUSG00000047649	0.185376	0.0595663
Elmod3	ENSMUSG00000056698	0.185215	0.0597923
Bbox1	ENSMUSG00000041660	0.185201	0.0598115
Pvrl4	ENSMUSG00000006411	0.185083	0.0599778
Nek2	ENSMUSG00000026622	0.184732	0.0604735
Reep6	ENSMUSG00000035504	0.184654	0.0605833
Ttc25	ENSMUSG00000006784	0.184419	0.0609184
Zfp182	ENSMUSG00000054737	0.184328	0.0610475
Upk2	ENSMUSG00000041523	0.184328	0.0610475
9030617O03Rik	ENSMUSG00000021185	0.184328	0.0610475
Wdhd1	ENSMUSG00000037572	0.184283	0.0611115
Tmem214	ENSMUSG00000038828	0.184153	0.0612981
Mfsd3	ENSMUSG00000019080	0.184094	0.0613825
Mettl22	ENSMUSG00000039345	0.18404	0.0614599
Ubd	ENSMUSG00000035186	0.183925	0.0616258
Lpin1	ENSMUSG00000020593	0.183845	0.06174
Ccno	ENSMUSG00000042417	0.183835	0.061755
Hyal3	ENSMUSG00000036091	0.183693	0.0619592
Arrdc1	ENSMUSG00000026972	0.183523	0.0622057
Slc11a2	ENSMUSG00000023030	0.183305	0.062523
Atg4d	ENSMUSG00000002820	0.183299	0.0625313
Clic6	ENSMUSG00000022949	0.183207	0.062665
Eif4a3	ENSMUSG00000025580	0.183149	0.0627499
Dnajb11	ENSMUSG00000004460	0.183011	0.0629519
Dpm3	ENSMUSG00000042737	0.182871	0.0631564
Exosc4	ENSMUSG00000034259	0.182471	0.0637461
Kcnc3	ENSMUSG00000062785	0.182365	0.0639034
Mtfr1	ENSMUSG00000027601	0.182257	0.0640626
2010107E04Rik	ENSMUSG00000021290	0.18218	0.0641772
Prss35	ENSMUSG00000033491	0.182153	0.0642174
Pglyrp1	ENSMUSG00000030413	0.182131	0.0642498
St14	ENSMUSG00000031995	0.181986	0.064467
Egf	ENSMUSG00000028017	0.181678	0.0649265
Mien1	ENSMUSG00000002580	0.181536	0.0651401
Zfp296	ENSMUSG00000011267	0.181486	0.0652156
Deb1	ENSMUSG00000032526	0.181307	0.0654865
Rnasel	ENSMUSG00000066800	0.180978	0.0659844
Rfk	ENSMUSG00000024712	0.180701	0.0664076
Dgat1	ENSMUSG00000022555	0.180629	0.0665167
Ctss	ENSMUSG00000038642	0.18037	0.0669139
Rnf123	ENSMUSG00000041528	0.180253	0.0670948
Bbs7	ENSMUSG00000037325	0.180112	0.0673117
Cdca3	ENSMUSG00000023505	0.179591	0.0681212
Dnajc6	ENSMUSG00000028528	0.179484	0.068288
2310035C23Rik	ENSMUSG00000026319	0.179256	0.068646
A530017D24Rik	ENSMUSG00000072847	0.179215	0.0687096
Rab7b	ENSMUSG00000052688	0.179199	0.0687355
Rps19bp1	ENSMUSG00000051518	0.178968	0.0690987
Get4	ENSMUSG00000025858	0.178761	0.0694273
Card14	ENSMUSG00000013483	0.178632	0.0696307
Ccbl2	ENSMUSG00000040213	0.17862	0.0696507
Magt1	ENSMUSG00000031232	0.17843	0.0699536
Blnk	ENSMUSG00000061132	0.178133	0.0704278
Erbb3	ENSMUSG00000018166	0.17776	0.0710272
Hells	ENSMUSG00000025001	0.177611	0.0712685
Grb7	ENSMUSG00000019312	0.177584	0.0713127
Ptges3l	ENSMUSG00000097487	0.177542	0.0713798
Neil1	ENSMUSG00000032298	0.177176	0.0719751
Cmtm4	ENSMUSG00000096188	0.177109	0.0720842
Ripk2	ENSMUSG00000041135	0.177099	0.0721015
Gm42726	ENSMUSG00000107102	0.177085	0.0721238
Mettl1	ENSMUSG00000006732	0.176884	0.0724535
Dolk	ENSMUSG00000075419	0.176864	0.0724862
Guca1a	ENSMUSG00000023982	0.176861	0.072491
Yeats2	ENSMUSG00000041215	0.176859	0.0724948
Tmem147	ENSMUSG00000006315	0.176766	0.0726474
Gcdh	ENSMUSG00000003809	0.176763	0.0726519
Psmd5	ENSMUSG00000026869	0.176729	0.0727082
Taf10	ENSMUSG00000043866	0.176593	0.0729325
D3Ertd751e	ENSMUSG00000025766	0.176587	0.0729408
Stat2	ENSMUSG00000040033	0.176406	0.0732403
Ptdss2	ENSMUSG00000025495	0.176251	0.073498
Tnc	ENSMUSG00000028364	0.176247	0.0735049
Fam160a2	ENSMUSG00000044465	0.176188	0.0736016
Krt19	ENSMUSG00000020911	0.176092	0.0737615
Ccnt2	ENSMUSG00000026349	0.176002	0.0739114
Gtse1	ENSMUSG00000022385	0.175815	0.0742242
1110020A21Rik	ENSMUSG00000097047	0.175668	0.0744707
Grhl1	ENSMUSG00000020656	0.175319	0.0750563
C2cd2	ENSMUSG00000045975	0.175225	0.0752165
Uck2	ENSMUSG00000026558	0.175071	0.0754761
Bst2	ENSMUSG00000046718	0.175015	0.0755715
Rnf121	ENSMUSG00000070426	0.174808	0.0759228
Cox7b	ENSMUSG00000031231	0.174569	0.0763309
Sowahb	ENSMUSG00000045314	0.174515	0.0764231
Slc35f5	ENSMUSG00000026342	0.174412	0.0766001
2700094K13Rik	ENSMUSG00000076437	0.174397	0.0766262
Dpagt1	ENSMUSG00000032123	0.174087	0.0771586
Pard6a	ENSMUSG00000005699	0.173982	0.0773416
Celsr2	ENSMUSG00000068740	0.173913	0.0774595
Usp38	ENSMUSG00000038250	0.173785	0.0776815
Prpf40b	ENSMUSG00000023007	0.17368	0.077865
Rtn3	ENSMUSG00000024758	0.17367	0.0778814
Bcl2l15	ENSMUSG00000044165	0.173668	0.0778852
Eif3j2	ENSMUSG00000043424	0.173313	0.078505
Slc25a33	ENSMUSG00000028982	0.173295	0.0785355
Acsl4	ENSMUSG00000031278	0.173185	0.0787288
Rassf6	ENSMUSG00000029370	0.172891	0.0792456
Ceacam20	ENSMUSG00000070777	0.172718	0.0795505
Sra1	ENSMUSG00000006050	0.172689	0.0796024
Rrp12	ENSMUSG00000035049	0.172356	0.0801932
Psmg3	ENSMUSG00000029551	0.172181	0.0805046
Spns2	ENSMUSG00000040447	0.172043	0.080751
Atp6v0a1	ENSMUSG00000019302	0.172008	0.080814
Fam118b	ENSMUSG00000050471	0.171941	0.0809341
Arg2	ENSMUSG00000021125	0.171785	0.0812144
Ammecr1	ENSMUSG00000042225	0.17175	0.0812775
Slc35f6	ENSMUSG00000029175	0.171689	0.081387
Tmem189	ENSMUSG00000090213	0.171633	0.0814875
Gca	ENSMUSG00000026893	0.171513	0.0817052
Imp4	ENSMUSG00000026127	0.171257	0.0821675
Impa2	ENSMUSG00000024525	0.171253	0.0821752
Zfp750	ENSMUSG00000039238	0.170915	0.0827909
Tulp1	ENSMUSG00000037446	0.170854	0.0829009
Spns3	ENSMUSG00000020798	0.170834	0.0829387
Pgap2	ENSMUSG00000030990	0.170642	0.0832899
Coq4	ENSMUSG00000026798	0.17064	0.083294
1110019D14Rik	ENSMUSG00000097616	0.170577	0.0834088
Ctns	ENSMUSG00000005949	0.170375	0.0837803
Rps28	ENSMUSG00000067288	0.170293	0.0839327
Tmem80	ENSMUSG00000025505	0.170205	0.0840954
Homer2	ENSMUSG00000025813	0.170166	0.0841666
Bscl2	ENSMUSG00000071657	0.170105	0.0842801
Slc5a8	ENSMUSG00000020062	0.170094	0.0842999
Stt3b	ENSMUSG00000032437	0.170089	0.0843085
Amot	ENSMUSG00000041688	0.170013	0.0844508
Ppfibp2	ENSMUSG00000036528	0.169979	0.084514
Mri1	ENSMUSG00000004996	0.169871	0.0847145
Dll4	ENSMUSG00000027314	0.169035	0.086279
Dcp1a	ENSMUSG00000021962	0.169029	0.0862906
Pold3	ENSMUSG00000030726	0.169026	0.0862968
Pgp	ENSMUSG00000043445	0.16896	0.086422
Ss18l1	ENSMUSG00000039086	0.16825	0.0877709
Nme6	ENSMUSG00000032478	0.168172	0.0879198
C87436	ENSMUSG00000046679	0.167734	0.0887627
Arhgap33	ENSMUSG00000036882	0.167667	0.0888916
Uqcr11	ENSMUSG00000020163	0.167553	0.0891114
Spcs2	ENSMUSG00000035227	0.167538	0.089141
Cabs1	ENSMUSG00000007907	0.167443	0.0893256
Ocln	ENSMUSG00000021638	0.167219	0.0897612
Lpcat3	ENSMUSG00000004270	0.16702	0.0901482
Dhx8	ENSMUSG00000034931	0.166964	0.0902583
Kcnj15	ENSMUSG00000062609	0.166875	0.090431
Nkrf	ENSMUSG00000044149	0.166836	0.0905077
Dennd1a	ENSMUSG00000035392	0.166802	0.0905759
Pigo	ENSMUSG00000028454	0.166799	0.0905807
Pop5	ENSMUSG00000060152	0.166624	0.090925
Pdzrn3	ENSMUSG00000035357	0.166509	0.0911516
Coa7	ENSMUSG00000048351	0.166284	0.0915945
Suv420h2	ENSMUSG00000059851	0.166234	0.0916934
Mtfp1	ENSMUSG00000004748	0.166211	0.0917402
Galnt3	ENSMUSG00000026994	0.166175	0.0918102
Pdgfd	ENSMUSG00000032006	0.166152	0.0918562
Hist1h2ab	ENSMUSG00000061615	0.166064	0.0920321
Lmf1	ENSMUSG00000002279	0.166062	0.0920353
Commd7	ENSMUSG00000056941	0.165863	0.0924312
Slc50a1	ENSMUSG00000027953	0.165853	0.0924512
2410131K14Rik	ENSMUSG00000032840	0.165796	0.0925651
Il10	ENSMUSG00000016529	0.165753	0.0926503
Pced1a	ENSMUSG00000037773	0.165753	0.0926503
Cenpi	ENSMUSG00000031262	0.165753	0.0926503
Hist2h2bb	ENSMUSG00000105827	0.165753	0.0926503
Grhl3	ENSMUSG00000037188	0.165753	0.0926503
Vgf	ENSMUSG00000037428	0.165753	0.0926503
Pkib	ENSMUSG00000019876	0.165753	0.0926503
Gm10146	ENSMUSG00000064317	0.165753	0.0926503
Parpbp	ENSMUSG00000035365	0.165753	0.0926503
Snx25	ENSMUSG00000038291	0.165753	0.0926503
Nrgn	ENSMUSG00000053310	0.165753	0.0926503
A330041J22Rik	ENSMUSG00000087466	0.165753	0.0926503
Myo1g	ENSMUSG00000020437	0.165753	0.0926503
Fignl1	ENSMUSG00000035455	0.165753	0.0926503
Slc22a5	ENSMUSG00000018900	0.165753	0.0926503
Aarsd1	ENSMUSG00000075528	0.165753	0.0926503
Hist1h2bk	ENSMUSG00000062727	0.165753	0.0926503
Troap	ENSMUSG00000032783	0.165753	0.0926503
Acot8	ENSMUSG00000017307	0.16575	0.0926565
9130230L23Rik	ENSMUSG00000054598	0.165749	0.0926576
G6pdx	ENSMUSG00000031400	0.165607	0.0929417
Poldip2	ENSMUSG00000001100	0.165531	0.0930937
Actr8	ENSMUSG00000015971	0.165294	0.0935704
1300002E11Rik	ENSMUSG00000097290	0.165228	0.0937023
Gmeb2	ENSMUSG00000038705	0.165029	0.094104
Cib1	ENSMUSG00000030538	0.164837	0.0944927
Vipr1	ENSMUSG00000032528	0.164809	0.0945506
Slc22a18	ENSMUSG00000000154	0.164642	0.0948892
Haus5	ENSMUSG00000078762	0.16429	0.095608
Gm37240	ENSMUSG00000102805	0.164261	0.095668
Rapgefl1	ENSMUSG00000038020	0.163893	0.0964238
Fundc1	ENSMUSG00000025040	0.163775	0.0966655
Tmem165	ENSMUSG00000029234	0.163462	0.0973135
Apln	ENSMUSG00000037010	0.163082	0.0981044
Tprn	ENSMUSG00000048707	0.163025	0.098225
Dnph1	ENSMUSG00000040658	0.163009	0.0982568
Hdhd3	ENSMUSG00000038422	0.162944	0.0983932
Htt	ENSMUSG00000029104	0.162709	0.098887
Impdh1	ENSMUSG00000003500	0.162639	0.0990338
Slc35c2	ENSMUSG00000017664	0.162521	0.0992824
Gm14137	ENSMUSG00000055926	0.162471	0.0993882
Gm15749	ENSMUSG00000089830	0.162471	0.0993882
Gm26810	ENSMUSG00000097817	0.162471	0.0993882
Inpp5j	ENSMUSG00000034570	0.162471	0.0993882
Gm10126	ENSMUSG00000063180	0.162471	0.0993882
Krt79	ENSMUSG00000061397	0.162471	0.0993882
Cd55	ENSMUSG00000026399	0.162391	0.0995565
Elovl1	ENSMUSG00000006390	0.162241	0.0998732
Tmem30b	ENSMUSG00000034435	0.162139	0.10009
Tor4a	ENSMUSG00000059555	0.16209	0.100195
Ndufc2	ENSMUSG00000030647	0.161841	0.100725
Pgm2l1	ENSMUSG00000030729	0.161771	0.100874
Fn3k	ENSMUSG00000025175	0.161651	0.10113
Pi4k2b	ENSMUSG00000029186	0.161639	0.101155
Pef1	ENSMUSG00000028779	0.161343	0.101791
Rfc5	ENSMUSG00000029363	0.161339	0.101799
D730048I06Rik	ENSMUSG00000032108	0.161167	0.10217
S100g	ENSMUSG00000040808	0.160797	0.10297
Tefm	ENSMUSG00000046909	0.160738	0.103098
Pomt1	ENSMUSG00000039254	0.16063	0.103333
Fes	ENSMUSG00000053158	0.160612	0.103372
Vps18	ENSMUSG00000034216	0.160303	0.104045
Cenpu	ENSMUSG00000031629	0.160063	0.104572
Lgals4	ENSMUSG00000053964	0.160062	0.104574
Cxcl17	ENSMUSG00000060188	0.159983	0.104747
Carf	ENSMUSG00000026017	0.159919	0.104889
Snhg9	ENSMUSG00000090101	0.159818	0.105112
Ccbl1	ENSMUSG00000039648	0.159766	0.105224
Plce1	ENSMUSG00000024998	0.159757	0.105246
Ptprt	ENSMUSG00000053141	0.159189	0.106505
Prss2	ENSMUSG00000057163	0.159189	0.106505
Col5a3	ENSMUSG00000004098	0.159189	0.106505
Nmral1	ENSMUSG00000063445	0.159189	0.106505
Arsb	ENSMUSG00000042082	0.159048	0.10682
Zfand2a	ENSMUSG00000053581	0.158872	0.107212
Jpx	ENSMUSG00000097571	0.158845	0.107272
Gm11273	ENSMUSG00000079941	0.15878	0.107418
Pcdh10	ENSMUSG00000049100	0.158189	0.10875
E130309D02Rik	ENSMUSG00000039244	0.158099	0.108955
Sulf2	ENSMUSG00000006800	0.157913	0.109376
Lyrm9	ENSMUSG00000072640	0.157906	0.109394
Ehhadh	ENSMUSG00000022853	0.15773	0.109794
Tmx2	ENSMUSG00000050043	0.157678	0.109911
Syvn1	ENSMUSG00000024807	0.157413	0.110518
Cox7a1	ENSMUSG00000074218	0.157037	0.111383
Cpox	ENSMUSG00000022742	0.156839	0.111839
Ikzf1	ENSMUSG00000018654	0.156226	0.113265
Rmi1	ENSMUSG00000035367	0.156146	0.113454
Siae	ENSMUSG00000001942	0.156018	0.113752
Tmem115	ENSMUSG00000010045	0.155997	0.113801
Tpcn2	ENSMUSG00000048677	0.155908	0.114011
Slc10a3	ENSMUSG00000032806	0.155906	0.114014
Chrnb2	ENSMUSG00000027950	0.155906	0.114014
Itga10	ENSMUSG00000090210	0.155906	0.114014
Gm10399	ENSMUSG00000072688	0.155906	0.114014
Fam60a	ENSMUSG00000039985	0.155906	0.114014
Dnajb13	ENSMUSG00000030708	0.155906	0.114014
Ctrl	ENSMUSG00000031896	0.155906	0.114014
Gm5611	ENSMUSG00000090602	0.155906	0.114014
Fbxl12os	ENSMUSG00000062470	0.155906	0.114014
Bcl11a	ENSMUSG00000000861	0.155906	0.114014
Gm11626	ENSMUSG00000086347	0.155906	0.114014
C030010L15Rik	ENSMUSG00000097874	0.155906	0.114014
Gnpnat1	ENSMUSG00000037722	0.155811	0.114238
C730034F03Rik	ENSMUSG00000079242	0.155761	0.114357
Rad51c	ENSMUSG00000007646	0.15558	0.114783
C2cd4b	ENSMUSG00000091956	0.155564	0.114821
Smyd3	ENSMUSG00000055067	0.155534	0.114892
Arl4a	ENSMUSG00000047446	0.155456	0.115076
Ubl4a	ENSMUSG00000015290	0.155426	0.115147
Cpsf4	ENSMUSG00000029625	0.155345	0.115338
Fam187b	ENSMUSG00000046826	0.155335	0.115362
Ticam1	ENSMUSG00000047123	0.155324	0.115389
Fam46c	ENSMUSG00000044468	0.154954	0.11627
Plekhm1	ENSMUSG00000034247	0.154874	0.11646
Plac8	ENSMUSG00000029322	0.154865	0.116481
Gm16174	ENSMUSG00000087593	0.154841	0.116539
Atp10b	ENSMUSG00000055415	0.154841	0.116539
Mcfd2	ENSMUSG00000024150	0.154648	0.117001
Apobr	ENSMUSG00000042759	0.154384	0.117633
Phf5a	ENSMUSG00000061360	0.154112	0.118289
Mrpl2	ENSMUSG00000002767	0.153961	0.118655
Irgq	ENSMUSG00000041037	0.153866	0.118885
Aldh1l2	ENSMUSG00000020256	0.153719	0.119243
Psmd12	ENSMUSG00000020720	0.153582	0.119576
Ldb3	ENSMUSG00000021798	0.153558	0.119635
Asrgl1	ENSMUSG00000024654	0.153521	0.119725
Slc17a9	ENSMUSG00000023393	0.153405	0.120008
2010109A12Rik	ENSMUSG00000029384	0.153405	0.120008
Slc30a6	ENSMUSG00000024069	0.153295	0.120277
Marveld3	ENSMUSG00000001672	0.153037	0.12091
Nck2	ENSMUSG00000066877	0.152938	0.121153
Samd1	ENSMUSG00000079003	0.152746	0.121627
Vps39	ENSMUSG00000027291	0.15274	0.121642
Mettl21c	ENSMUSG00000047343	0.152624	0.121928
Prlh	ENSMUSG00000090550	0.152624	0.121928
Noxa1	ENSMUSG00000036805	0.152624	0.121928
1700026D11Rik	ENSMUSG00000086379	0.152624	0.121928
Gm11457	ENSMUSG00000086453	0.152624	0.121928
Tlr13	ENSMUSG00000033777	0.152624	0.121928
Zbtb8b	ENSMUSG00000048485	0.152624	0.121928
Fhad1	ENSMUSG00000051435	0.152624	0.121928
Gm43936	ENSMUSG00000107876	0.152624	0.121928
Gm44448	ENSMUSG00000107767	0.152624	0.121928
Irgc1	ENSMUSG00000062028	0.152624	0.121928
Lrrc56	ENSMUSG00000038637	0.152624	0.121928
RP23-124B2.7	ENSMUSG00000108934	0.152624	0.121928
F930017D23Rik	ENSMUSG00000075184	0.152624	0.121928
Doc2b	ENSMUSG00000020848	0.152624	0.121928
Eci3	ENSMUSG00000021416	0.152624	0.121928
Gsdmc	ENSMUSG00000079025	0.152624	0.121928
Ldoc1l	ENSMUSG00000055745	0.152624	0.121928
4930565N06Rik	ENSMUSG00000084834	0.152624	0.121928
Pi16	ENSMUSG00000024011	0.152624	0.121928
H2-Oa	ENSMUSG00000024334	0.152624	0.121928
Shd	ENSMUSG00000039154	0.152624	0.121928
Gnal	ENSMUSG00000024524	0.152624	0.121928
Timm8a1	ENSMUSG00000048007	0.152559	0.122089
Ncald	ENSMUSG00000051359	0.152449	0.122362
Hbegf	ENSMUSG00000024486	0.151974	0.123545
Adi1	ENSMUSG00000020629	0.151915	0.123692
Tsta3	ENSMUSG00000022570	0.15189	0.123755
Tex30	ENSMUSG00000026049	0.151878	0.123784
Dusp4	ENSMUSG00000031530	0.151743	0.124124
Slc16a2	ENSMUSG00000033965	0.151639	0.124383
Polb	ENSMUSG00000031536	0.151633	0.124398
Mmgt2	ENSMUSG00000048497	0.151531	0.124655
Sema4a	ENSMUSG00000028064	0.151499	0.124736
Plekha6	ENSMUSG00000041757	0.151241	0.125387
Gemin2	ENSMUSG00000060121	0.151169	0.125569
Proser1	ENSMUSG00000049504	0.151095	0.125756
Papln	ENSMUSG00000021223	0.150871	0.126324
Ttyh3	ENSMUSG00000036565	0.150816	0.126463
Slc5a6	ENSMUSG00000006641	0.150801	0.126503
Zfp141	ENSMUSG00000092416	0.150425	0.127462
Tuft1	ENSMUSG00000005968	0.150283	0.127825
Ankrd22	ENSMUSG00000024774	0.150261	0.127884
Pabpc4	ENSMUSG00000011257	0.150211	0.128012
Lypd3	ENSMUSG00000057454	0.15012	0.128244
Ugcg	ENSMUSG00000028381	0.150001	0.128552
Il23a	ENSMUSG00000025383	0.149983	0.128596
Mfsd11	ENSMUSG00000020818	0.149904	0.1288
Cenpm	ENSMUSG00000068101	0.149864	0.128905
Wnt7b	ENSMUSG00000022382	0.149862	0.12891
Sigmar1	ENSMUSG00000036078	0.149546	0.129728
Rnf25	ENSMUSG00000026171	0.149485	0.129886
Mpi	ENSMUSG00000032306	0.149409	0.130083
Syne3	ENSMUSG00000054150	0.149358	0.130216
Slc25a1	ENSMUSG00000003528	0.149352	0.130232
Adora1	ENSMUSG00000042429	0.149342	0.130258
Nr1i3	ENSMUSG00000005677	0.149342	0.130258
Gm20878	ENSMUSG00000078747	0.149342	0.130258
Gm16401	ENSMUSG00000072962	0.149342	0.130258
Slc39a6	ENSMUSG00000024270	0.149227	0.130557
Icam5	ENSMUSG00000032174	0.149189	0.130655
Ucp3	ENSMUSG00000032942	0.14918	0.13068
Manf	ENSMUSG00000032575	0.149067	0.130975
Atp6v1e1	ENSMUSG00000019210	0.149019	0.1311
Gm21092	ENSMUSG00000095403	0.148741	0.13183
Rwdd2b	ENSMUSG00000041079	0.148622	0.132142
Dapp1	ENSMUSG00000028159	0.148525	0.132398
Commd3	ENSMUSG00000051154	0.148417	0.132681
Acot6	ENSMUSG00000043487	0.148401	0.132724
Pgap3	ENSMUSG00000038208	0.148369	0.132809
Fdx1	ENSMUSG00000032051	0.148264	0.133085
Gm20554	ENSMUSG00000093587	0.148119	0.133469
Pddc1	ENSMUSG00000051007	0.14785	0.134184
Pde7a	ENSMUSG00000069094	0.147691	0.134607
6330416G13Rik	ENSMUSG00000045917	0.147681	0.134634
Mtx1	ENSMUSG00000064068	0.147481	0.135169
Cox19	ENSMUSG00000045438	0.147335	0.135561
Tyro3	ENSMUSG00000027298	0.147106	0.136178
Nfkbib	ENSMUSG00000030595	0.147084	0.136235
Lama5	ENSMUSG00000015647	0.147063	0.136292
Oasl1	ENSMUSG00000041827	0.147059	0.136303
Pacsin3	ENSMUSG00000027257	0.146899	0.136734
Timd2	ENSMUSG00000040413	0.146638	0.137442
Ccl6	ENSMUSG00000018927	0.146406	0.138072
Pim2	ENSMUSG00000031155	0.14606	0.139016
D630029K05Rik	ENSMUSG00000031294	0.14606	0.139016
Pcdh8	ENSMUSG00000036422	0.14606	0.139016
Gm9922	ENSMUSG00000053821	0.14606	0.139016
Mmp3	ENSMUSG00000043613	0.14606	0.139016
Zfp953	ENSMUSG00000098905	0.14606	0.139016
Gm18025	ENSMUSG00000095406	0.14606	0.139016
Mrpl17	ENSMUSG00000030879	0.145828	0.139651
Rpe	ENSMUSG00000026005	0.145766	0.13982
Pigt	ENSMUSG00000017721	0.145702	0.139997
4732490B19Rik	ENSMUSG00000085421	0.145494	0.140569
Per1	ENSMUSG00000020893	0.145398	0.140834
Bola1	ENSMUSG00000015943	0.145375	0.140898
Mrpl45	ENSMUSG00000018882	0.145352	0.140962
Prpf3	ENSMUSG00000015748	0.145317	0.141059
Dpm2	ENSMUSG00000026810	0.145273	0.141181
Gak	ENSMUSG00000062234	0.145245	0.141257
Sectm1a	ENSMUSG00000025165	0.145117	0.141613
Kcnk1	ENSMUSG00000033998	0.145089	0.14169
Them4	ENSMUSG00000028145	0.144856	0.142336
Igsf9	ENSMUSG00000037995	0.14466	0.142885
Mpv17l	ENSMUSG00000022679	0.14448	0.143386
Usp30	ENSMUSG00000029592	0.144317	0.143843
Tssc4	ENSMUSG00000045752	0.144114	0.144414
Zbtb24	ENSMUSG00000019826	0.143972	0.144815
Trib3	ENSMUSG00000032715	0.14397	0.14482
Pam16	ENSMUSG00000014301	0.143842	0.145182
Tmem86b	ENSMUSG00000045282	0.143821	0.14524
Entpd2	ENSMUSG00000015085	0.143778	0.145362
Mlxipl	ENSMUSG00000005373	0.143718	0.145533
L3mbtl2	ENSMUSG00000022394	0.143691	0.145608
Cecr2	ENSMUSG00000071226	0.143562	0.145973
Lman2	ENSMUSG00000021484	0.143465	0.146248
Lsm10	ENSMUSG00000050188	0.143347	0.146586
Arhgap11a	ENSMUSG00000041219	0.143157	0.147127
Rad51	ENSMUSG00000027323	0.143157	0.147127
Iqgap3	ENSMUSG00000028068	0.143157	0.147127
Adat1	ENSMUSG00000031949	0.143157	0.147127
Hist1h2bj	ENSMUSG00000069300	0.143157	0.147127
Cdc25c	ENSMUSG00000044201	0.143157	0.147127
Rab3ip	ENSMUSG00000064181	0.143126	0.147217
Cox6b1	ENSMUSG00000036751	0.143055	0.147418
Cdk16	ENSMUSG00000031065	0.142983	0.147625
9330175M20Rik	ENSMUSG00000101799	0.142777	0.148213
Tmem74b	ENSMUSG00000044364	0.142777	0.148213
Gm42794	ENSMUSG00000104839	0.142777	0.148213
Gm26515	ENSMUSG00000097152	0.142777	0.148213
U2af1l4	ENSMUSG00000078765	0.142777	0.148213
Tbx6	ENSMUSG00000030699	0.142777	0.148213
Ipcef1	ENSMUSG00000064065	0.142777	0.148213
Gm26772	ENSMUSG00000097136	0.142777	0.148213
Gm16617	ENSMUSG00000097633	0.142777	0.148213
Fam124a	ENSMUSG00000035184	0.142777	0.148213
Gpr183	ENSMUSG00000051212	0.142777	0.148213
Cct6b	ENSMUSG00000020698	0.142777	0.148213
Tmem104	ENSMUSG00000045980	0.142777	0.148213
Mucl2	ENSMUSG00000036925	0.142777	0.148213
Zfp821	ENSMUSG00000031728	0.142752	0.148287
Stc2	ENSMUSG00000020303	0.14268	0.148493
Zc2hc1c	ENSMUSG00000045064	0.142624	0.148654
Gatc	ENSMUSG00000029536	0.142409	0.149275
Mustn1	ENSMUSG00000042485	0.142195	0.149894
Clec2e	ENSMUSG00000030155	0.142188	0.149912
Krt78	ENSMUSG00000050463	0.142036	0.150354
Cbx5	ENSMUSG00000009575	0.142021	0.150398
Pds5b	ENSMUSG00000034021	0.141816	0.150993
Napa	ENSMUSG00000006024	0.141732	0.151236
1700037C18Rik	ENSMUSG00000005983	0.141722	0.151266
Cinp	ENSMUSG00000021276	0.141712	0.151295
Cenpv	ENSMUSG00000018509	0.141694	0.151348
Nhlrc3	ENSMUSG00000042997	0.141554	0.151756
Uba5	ENSMUSG00000032557	0.141492	0.151938
1700113A16Rik	ENSMUSG00000096935	0.14149	0.151943
Uxt	ENSMUSG00000001134	0.141454	0.15205
Tmprss4	ENSMUSG00000032091	0.141365	0.152309
Cdk1	ENSMUSG00000019942	0.141363	0.152315
Pbk	ENSMUSG00000022033	0.141363	0.152315
Ccl9	ENSMUSG00000019122	0.141268	0.152595
Hirip3	ENSMUSG00000042606	0.141123	0.153021
Pmf1	ENSMUSG00000028066	0.14111	0.153059
Tfip11	ENSMUSG00000029345	0.141058	0.15321
C1galt1	ENSMUSG00000042460	0.140901	0.153675
Stard10	ENSMUSG00000030688	0.140684	0.154315
Foxs1	ENSMUSG00000074676	0.140627	0.154484
Abhd17c	ENSMUSG00000038459	0.140319	0.155396
Elf3	ENSMUSG00000003051	0.140183	0.155801
Riok3	ENSMUSG00000024404	0.139962	0.156462
Tmem71	ENSMUSG00000036944	0.139771	0.157033
Pisd	ENSMUSG00000023452	0.13976	0.157067
Cpt2	ENSMUSG00000028607	0.139691	0.157274
Kif26b	ENSMUSG00000026494	0.139495	0.157862
Utf1	ENSMUSG00000047751	0.139495	0.157862
Gm26674	ENSMUSG00000097597	0.139495	0.157862
Fanca	ENSMUSG00000032815	0.139495	0.157862
Gm17586	ENSMUSG00000097062	0.139495	0.157862
Krtcap3	ENSMUSG00000029149	0.139259	0.158573
Gm3336	ENSMUSG00000095026	0.139231	0.158658
Dlg1	ENSMUSG00000022770	0.139182	0.158806
Sh3bp2	ENSMUSG00000054520	0.139182	0.158806
Tmem41a	ENSMUSG00000022856	0.139157	0.158881
Cdip1	ENSMUSG00000004071	0.139018	0.159304
Pex16	ENSMUSG00000027222	0.13892	0.159599
Cox5a	ENSMUSG00000000088	0.138901	0.159657
Acaca	ENSMUSG00000020532	0.138698	0.160275
Fpgs	ENSMUSG00000009566	0.138669	0.160361
Ap2s1	ENSMUSG00000008036	0.138244	0.161659
Rps6ka1	ENSMUSG00000003644	0.13821	0.161763
Adamts5	ENSMUSG00000022894	0.137987	0.162449
Kcnk6	ENSMUSG00000046410	0.13796	0.162531
Tle3	ENSMUSG00000032280	0.137905	0.162702
Golt1b	ENSMUSG00000030245	0.137852	0.162864
BC003331	ENSMUSG00000006010	0.137454	0.164093
2810417H13Rik	ENSMUSG00000040204	0.137439	0.16414
Rnf181	ENSMUSG00000055850	0.137377	0.164332
Tead4	ENSMUSG00000030353	0.137359	0.164388
5430416N02Rik	ENSMUSG00000097772	0.137287	0.164612
AV099323	ENSMUSG00000087377	0.137192	0.164906
Stap2	ENSMUSG00000038781	0.136974	0.165585
Usp19	ENSMUSG00000006676	0.136841	0.166002
Mgst1	ENSMUSG00000008540	0.136624	0.16668
Vasn	ENSMUSG00000039646	0.13659	0.166787
Wdr4	ENSMUSG00000024037	0.136382	0.16744
Galk1	ENSMUSG00000020766	0.136298	0.167703
Sytl3	ENSMUSG00000041831	0.136228	0.167924
A630095N17Rik	ENSMUSG00000096094	0.136213	0.167971
Dsn1	ENSMUSG00000027635	0.136213	0.167971
Rbm12b1	ENSMUSG00000046667	0.136213	0.167971
Tmc7	ENSMUSG00000042246	0.136213	0.167971
Sct	ENSMUSG00000038580	0.136213	0.167971
2810030D12Rik	ENSMUSG00000099338	0.136213	0.167971
Asf1b	ENSMUSG00000005470	0.136213	0.167971
Olfr921	ENSMUSG00000049926	0.136213	0.167971
Atrip	ENSMUSG00000025646	0.136213	0.167971
Hist1h4c	ENSMUSG00000060678	0.136213	0.167971
Gm17541	ENSMUSG00000091732	0.136213	0.167971
Gm26571	ENSMUSG00000096953	0.136213	0.167971
Aifm3	ENSMUSG00000022763	0.136213	0.167971
4930444M15Rik	ENSMUSG00000097172	0.136183	0.168065
Tob1	ENSMUSG00000037573	0.135864	0.169075
Ctsc	ENSMUSG00000030560	0.13585	0.169119
Spag5	ENSMUSG00000002055	0.135838	0.169155
Surf4	ENSMUSG00000014867	0.135643	0.169775
2510017J16Rik	ENSMUSG00000104891	0.1356	0.169911
Myo5c	ENSMUSG00000033590	0.135556	0.170051
Pnpla2	ENSMUSG00000025509	0.135443	0.17041
Brms1	ENSMUSG00000080268	0.135396	0.17056
Capn5	ENSMUSG00000035547	0.13539	0.17058
Traf1	ENSMUSG00000026875	0.135338	0.170745
Gm11827	ENSMUSG00000086765	0.135286	0.170911
Slc25a26	ENSMUSG00000045100	0.135216	0.171136
1700056N10Rik	ENSMUSG00000084792	0.135044	0.171685
Cers2	ENSMUSG00000015714	0.13476	0.172596
Ctsh	ENSMUSG00000032359	0.134758	0.172603
Cdc7	ENSMUSG00000029283	0.134738	0.172668
Isoc2a	ENSMUSG00000086784	0.134701	0.172785
Ptgr1	ENSMUSG00000028378	0.134557	0.173249
Arhgap9	ENSMUSG00000040345	0.134439	0.173632
Cog8	ENSMUSG00000031916	0.134348	0.173924
C3	ENSMUSG00000024164	0.134334	0.173971
1700093K21Rik	ENSMUSG00000020286	0.134124	0.17465
Ppp1r16a	ENSMUSG00000033819	0.134006	0.175034
Gm4951	ENSMUSG00000073555	0.133953	0.175206
Cdc6	ENSMUSG00000017499	0.133866	0.175487
Slc20a1	ENSMUSG00000027397	0.133843	0.175565
Gabbr2	ENSMUSG00000039809	0.133739	0.175903
Mmp28	ENSMUSG00000020682	0.133739	0.175903
Mief2	ENSMUSG00000018599	0.133719	0.175966
Gm16536	ENSMUSG00000089810	0.133694	0.176049
Edn2	ENSMUSG00000028635	0.133649	0.176195
Lyplal1	ENSMUSG00000039246	0.133604	0.176343
Alg2	ENSMUSG00000039740	0.133502	0.176675
Tuba4a	ENSMUSG00000026202	0.133495	0.176698
Hn1l	ENSMUSG00000024165	0.133277	0.177413
Naa20	ENSMUSG00000002728	0.133272	0.177429
Narfl	ENSMUSG00000002280	0.133145	0.177848
Tspan17	ENSMUSG00000025875	0.133067	0.178103
Tgm1	ENSMUSG00000022218	0.132968	0.178429
Ece2	ENSMUSG00000022842	0.132943	0.178513
4933406J08Rik	ENSMUSG00000027229	0.132931	0.178552
Inmt	ENSMUSG00000003477	0.132931	0.178552
Gm11789	ENSMUSG00000084983	0.132931	0.178552
Gm26513	ENSMUSG00000097150	0.132931	0.178552
Tnfaip6	ENSMUSG00000053475	0.132912	0.178614
Ranbp6	ENSMUSG00000074909	0.132597	0.179656
Tmem234	ENSMUSG00000028797	0.132578	0.179719
Ppcdc	ENSMUSG00000063849	0.132534	0.179863
Ap5s1	ENSMUSG00000068264	0.13251	0.179942
Gm14305	ENSMUSG00000078878	0.132452	0.180136
Rnaseh2a	ENSMUSG00000052926	0.13243	0.180208
Tmprss13	ENSMUSG00000037129	0.132362	0.180435
Uba1	ENSMUSG00000001924	0.132298	0.180647
Zbp1	ENSMUSG00000027514	0.132279	0.180708
Cdkl3	ENSMUSG00000020389	0.132174	0.18106
Ppcs	ENSMUSG00000028636	0.132089	0.181344
Tmem97	ENSMUSG00000037278	0.132066	0.181421
Junos	ENSMUSG00000087366	0.13204	0.181506
Cops3	ENSMUSG00000019373	0.13198	0.181707
Ftx	ENSMUSG00000086370	0.131695	0.182658
Mfap4	ENSMUSG00000042436	0.131618	0.182919
Lgals3bp	ENSMUSG00000033880	0.131565	0.183094
Tbrg4	ENSMUSG00000000384	0.131468	0.183422
Ccl12	ENSMUSG00000035352	0.131384	0.183703
Derl1	ENSMUSG00000022365	0.13134	0.183852
Romo1	ENSMUSG00000067847	0.131177	0.184401
Hspa13	ENSMUSG00000032932	0.131176	0.184404
Heyl	ENSMUSG00000032744	0.13116	0.184459
Coasy	ENSMUSG00000001755	0.13116	0.184459
Orai2	ENSMUSG00000039747	0.131115	0.18461
Map2k7	ENSMUSG00000002948	0.131089	0.184698
Kctd20	ENSMUSG00000005936	0.131056	0.184811
Reps1	ENSMUSG00000019854	0.131004	0.184987
Syngr1	ENSMUSG00000022415	0.130916	0.185284
Gm26549	ENSMUSG00000097217	0.130891	0.185369
C1qa	ENSMUSG00000036887	0.130752	0.185842
Slfn2	ENSMUSG00000072620	0.130419	0.186974
Abhd11	ENSMUSG00000040532	0.130363	0.187165
Dbr1	ENSMUSG00000032469	0.130351	0.187204
Fzr1	ENSMUSG00000020235	0.130338	0.187248
4930539E08Rik	ENSMUSG00000048905	0.130314	0.18733
Pex1	ENSMUSG00000005907	0.130245	0.187568
Spc25	ENSMUSG00000005233	0.130199	0.187725
Zfp617	ENSMUSG00000066880	0.130173	0.187812
Mtbp	ENSMUSG00000022369	0.130173	0.187812
Zcchc8	ENSMUSG00000029427	0.13012	0.187996
Tbc1d8	ENSMUSG00000003134	0.130101	0.18806
Proser2	ENSMUSG00000045319	0.129938	0.188618
Mfsd1	ENSMUSG00000027775	0.129877	0.188826
Snrnp40	ENSMUSG00000074088	0.129872	0.188845
Hmgcs1	ENSMUSG00000093930	0.129822	0.189018
Ndufb5	ENSMUSG00000027673	0.129789	0.189128
Timp1	ENSMUSG00000001131	0.129785	0.189144
Opn1mw	ENSMUSG00000031394	0.129725	0.18935
RP23-106P7.5	ENSMUSG00000109128	0.129648	0.189613
Dancr	ENSMUSG00000053656	0.129648	0.189613
6430562O15Rik	ENSMUSG00000097828	0.129648	0.189613
Gm26749	ENSMUSG00000097546	0.129648	0.189613
Alad	ENSMUSG00000028393	0.129614	0.189731
Zfp1	ENSMUSG00000055835	0.129565	0.1899
Rnf5	ENSMUSG00000015478	0.129562	0.189911
Prkaa2	ENSMUSG00000028518	0.129476	0.190206
Myof	ENSMUSG00000048612	0.129305	0.190798
Ppa1	ENSMUSG00000020089	0.129045	0.191701
Rnaset2a	ENSMUSG00000095687	0.129041	0.191712
Fancf	ENSMUSG00000092118	0.12894	0.192064
Rab3d	ENSMUSG00000019066	0.128846	0.192393
Cbwd1	ENSMUSG00000024878	0.128832	0.19244
Mocos	ENSMUSG00000039616	0.128777	0.192633
Rbl2	ENSMUSG00000031666	0.128695	0.192918
Ttc26	ENSMUSG00000056832	0.128402	0.193942
Rwdd3	ENSMUSG00000028133	0.128384	0.194005
Irf9	ENSMUSG00000002325	0.128049	0.195179
Nfe2l3	ENSMUSG00000029832	0.128018	0.19529
Usp35	ENSMUSG00000035713	0.127869	0.195815
Arpc1b	ENSMUSG00000029622	0.127821	0.195982
Cntd1	ENSMUSG00000078653	0.127819	0.195991
Sptb	ENSMUSG00000021061	0.127819	0.195991
Gm20517	ENSMUSG00000023984	0.127758	0.196205
Fbxw7	ENSMUSG00000028086	0.127661	0.196548
Esrp2	ENSMUSG00000084128	0.127646	0.196601
Cenpw	ENSMUSG00000075266	0.127418	0.197409
Mdh1	ENSMUSG00000020321	0.127149	0.198364
Mllt4	ENSMUSG00000068036	0.127074	0.198632
Exph5	ENSMUSG00000034584	0.127042	0.198746
Naprt	ENSMUSG00000022574	0.127042	0.198746
Tfb1m	ENSMUSG00000036983	0.126989	0.198934
Rdh11	ENSMUSG00000066441	0.126835	0.199485
Cnnm3	ENSMUSG00000001138	0.126799	0.199612
Gabpb2	ENSMUSG00000038766	0.12676	0.199753
Anapc15	ENSMUSG00000030649	0.126753	0.199778
Elp6	ENSMUSG00000054836	0.126679	0.200043
Stil	ENSMUSG00000028718	0.126675	0.200055
Gm43661	ENSMUSG00000104818	0.126675	0.200055
Prdx4	ENSMUSG00000025289	0.126606	0.200302
Sars	ENSMUSG00000068739	0.126473	0.200779
Rubcn	ENSMUSG00000035629	0.126413	0.200994
Gm10804	ENSMUSG00000075025	0.126366	0.201164
Tuba8	ENSMUSG00000030137	0.126366	0.201164
Gm11744	ENSMUSG00000075410	0.126366	0.201164
mt-Nd3	ENSMUSG00000064360	0.126366	0.201164
Slc25a45	ENSMUSG00000024818	0.126319	0.201333
Stra13	ENSMUSG00000025144	0.126313	0.201354
Myo5b	ENSMUSG00000025885	0.126297	0.201411
5031439G07Rik	ENSMUSG00000036046	0.126218	0.201696
Asl	ENSMUSG00000025533	0.126182	0.201826
Faah	ENSMUSG00000034171	0.126182	0.201827
Ptafr	ENSMUSG00000056529	0.126072	0.202224
Lilra5	ENSMUSG00000070873	0.126047	0.202312
Gatb	ENSMUSG00000028085	0.126029	0.202379
Rbm3	ENSMUSG00000031167	0.125983	0.202544
Zcchc10	ENSMUSG00000018239	0.125927	0.202746
Ccdc115	ENSMUSG00000042111	0.125719	0.2035
A330069E16Rik	ENSMUSG00000097868	0.125431	0.204546
Ppan	ENSMUSG00000004100	0.125371	0.204765
Jmjd6	ENSMUSG00000056962	0.12537	0.204767
2510046G10Rik	ENSMUSG00000066175	0.125219	0.205317
Gphn	ENSMUSG00000047454	0.12514	0.205607
Pgm3	ENSMUSG00000056131	0.125096	0.205767
Ccdc142os	ENSMUSG00000087578	0.125061	0.205896
Nedd1	ENSMUSG00000019988	0.125059	0.205902
Mtg2	ENSMUSG00000039069	0.124983	0.20618
Lss	ENSMUSG00000033105	0.1248	0.20685
Asb6	ENSMUSG00000039483	0.124745	0.207052
Parp2	ENSMUSG00000036023	0.124517	0.207889
Polr1b	ENSMUSG00000027395	0.124394	0.208343
Lyrm2	ENSMUSG00000045854	0.124355	0.208487
Tmem17	ENSMUSG00000049904	0.124317	0.208626
Mia3	ENSMUSG00000056050	0.124241	0.208908
Ndufaf3	ENSMUSG00000070283	0.124167	0.209179
A630023A22Rik	ENSMUSG00000095493	0.124094	0.209451
Hes6	ENSMUSG00000067071	0.124065	0.209558
Pcdhga8	ENSMUSG00000023036	0.124042	0.209644
S100a1	ENSMUSG00000044080	0.124014	0.209745
H2-Q6	ENSMUSG00000073409	0.123907	0.210144
Clp1	ENSMUSG00000027079	0.12378	0.210614
Mcm6	ENSMUSG00000026355	0.123679	0.21099
Nusap1	ENSMUSG00000027306	0.123674	0.211009
Saa3	ENSMUSG00000040026	0.123651	0.211094
Brd8	ENSMUSG00000003778	0.123614	0.211232
Ears2	ENSMUSG00000030871	0.123559	0.211436
Opa3	ENSMUSG00000052214	0.12337	0.212143
Gcn1l1	ENSMUSG00000041638	0.123246	0.212603
Hdac10	ENSMUSG00000062906	0.123195	0.212794
Gramd2	ENSMUSG00000074259	0.123085	0.213207
Fam124b	ENSMUSG00000043230	0.123084	0.213211
Fcgr4	ENSMUSG00000059089	0.123084	0.213211
Fam73b	ENSMUSG00000026858	0.123084	0.213211
Chac1	ENSMUSG00000027313	0.123084	0.213211
Lonrf3	ENSMUSG00000016239	0.123084	0.213211
Trim55	ENSMUSG00000060913	0.123084	0.213211
Gstm6	ENSMUSG00000068762	0.123084	0.213211
Gm12976	ENSMUSG00000087575	0.123084	0.213211
1700096K18Rik	ENSMUSG00000101856	0.123084	0.213211
Gm20629	ENSMUSG00000093479	0.123084	0.213211
Gm42596	ENSMUSG00000105482	0.123084	0.213211
Sva	ENSMUSG00000023289	0.123084	0.213211
Hcst	ENSMUSG00000064109	0.123084	0.213211
Aen	ENSMUSG00000030609	0.123084	0.213211
Gm16793	ENSMUSG00000097357	0.123084	0.213211
Gm10311	ENSMUSG00000071083	0.123084	0.213211
Sema3g	ENSMUSG00000021904	0.123084	0.213211
Lrrc63	ENSMUSG00000021997	0.123084	0.213211
Amigo3	ENSMUSG00000032593	0.123084	0.213211
5830454E08Rik	ENSMUSG00000052658	0.123084	0.213211
Gm12184	ENSMUSG00000078154	0.123084	0.213211
Appbp2os	ENSMUSG00000085628	0.123084	0.213211
Zpbp2	ENSMUSG00000017195	0.123084	0.213211
Akr1c13	ENSMUSG00000021213	0.123084	0.213211
Gm10863	ENSMUSG00000075555	0.123084	0.213211
Gm9242	ENSMUSG00000096156	0.123084	0.213211
Wbp1l	ENSMUSG00000047731	0.123047	0.213348
G2e3	ENSMUSG00000035293	0.123046	0.213353
Mospd2	ENSMUSG00000061778	0.123022	0.213445
Gpr180	ENSMUSG00000022131	0.122914	0.213849
Zfp710	ENSMUSG00000048897	0.122741	0.214499
Grik3	ENSMUSG00000001985	0.122706	0.214631
Galnt1	ENSMUSG00000000420	0.122664	0.214788
Ckmt1	ENSMUSG00000000308	0.122609	0.214996
Sh3bp4	ENSMUSG00000036206	0.122567	0.215156
2610528A11Rik	ENSMUSG00000096001	0.12241	0.215747
Snap29	ENSMUSG00000022765	0.122379	0.215865
Supt4a	ENSMUSG00000020485	0.122139	0.216773
Fgd1	ENSMUSG00000025265	0.122133	0.216797
Cmpk2	ENSMUSG00000020638	0.122133	0.216797
Samm50	ENSMUSG00000022437	0.122035	0.217169
Ebag9	ENSMUSG00000022339	0.122026	0.217201
Tipin	ENSMUSG00000032397	0.121902	0.217673
AU020206	ENSMUSG00000097415	0.121892	0.217712
Rnf149	ENSMUSG00000048234	0.121844	0.217895
B4galt7	ENSMUSG00000021504	0.121761	0.218211
Abi3	ENSMUSG00000018381	0.12154	0.219054
Higd2a	ENSMUSG00000025868	0.121433	0.219462
Zfp839	ENSMUSG00000021271	0.121429	0.219475
2900009J06Rik	ENSMUSG00000102014	0.12122	0.220277
Racgap1	ENSMUSG00000023015	0.121208	0.220322
Shtn1	ENSMUSG00000041362	0.120891	0.221541
Med12	ENSMUSG00000079487	0.120832	0.221767
Mllt11	ENSMUSG00000053192	0.12073	0.222162
Slc2a8	ENSMUSG00000026791	0.120622	0.222577
Slc37a1	ENSMUSG00000024036	0.120131	0.22448
Ccna2	ENSMUSG00000027715	0.120031	0.22487
Spink8	ENSMUSG00000050074	0.120019	0.224916
Cutal	ENSMUSG00000026870	0.119891	0.225415
Rapgef4os3	ENSMUSG00000086231	0.119802	0.225763
4930518I15Rik	ENSMUSG00000074629	0.119802	0.225763
Gm14306	ENSMUSG00000078879	0.119802	0.225763
Gm15952	ENSMUSG00000085655	0.119802	0.225763
BC107364	ENSMUSG00000046317	0.119802	0.225763
Gm13307	ENSMUSG00000085730	0.119802	0.225763
Gm26982	ENSMUSG00000097994	0.119802	0.225763
1700112J16Rik	ENSMUSG00000097527	0.119802	0.225763
4933427G17Rik	ENSMUSG00000030877	0.119802	0.225763
Gm17039	ENSMUSG00000092103	0.119802	0.225763
Gm15325	ENSMUSG00000086861	0.119802	0.225763
Foxa1	ENSMUSG00000035451	0.119802	0.225763
Gm7535	ENSMUSG00000090957	0.119802	0.225763
Golm1	ENSMUSG00000021556	0.119701	0.226156
Mrpl39	ENSMUSG00000022889	0.119641	0.226391
St6galnac2	ENSMUSG00000057286	0.119511	0.226899
Ivd	ENSMUSG00000027332	0.119303	0.227717
Polr3k	ENSMUSG00000038628	0.119274	0.22783
Mapk4	ENSMUSG00000024558	0.119258	0.227891
Ube4a	ENSMUSG00000059890	0.119255	0.227904
Gm17088	ENSMUSG00000091438	0.118984	0.228971
Dhfr	ENSMUSG00000021707	0.118964	0.229049
Gm14295	ENSMUSG00000078877	0.118946	0.229118
Ncln	ENSMUSG00000020238	0.118848	0.229506
Dlx4	ENSMUSG00000020871	0.118804	0.229679
2210016F16Rik	ENSMUSG00000021550	0.11878	0.229773
Lman2l	ENSMUSG00000001143	0.118763	0.229843
Capn15	ENSMUSG00000037326	0.118667	0.230221
Ahcyl2	ENSMUSG00000029772	0.11854	0.230724
Cldn34c1	ENSMUSG00000079450	0.118535	0.230743
Slc25a43	ENSMUSG00000037636	0.11849	0.230921
2310015A10Rik	ENSMUSG00000097729	0.11849	0.230921
Nfxl1	ENSMUSG00000072889	0.118344	0.231501
Slc38a7	ENSMUSG00000036534	0.118146	0.232289
Abcd1	ENSMUSG00000031378	0.118141	0.232307
Akip1	ENSMUSG00000031023	0.118078	0.232561
Mpdu1	ENSMUSG00000018761	0.117868	0.233396
Dock8	ENSMUSG00000052085	0.117688	0.234118
2310057J18Rik	ENSMUSG00000015519	0.117659	0.234233
Uqcrfs1	ENSMUSG00000038462	0.117573	0.234577
H2-Q2	ENSMUSG00000091705	0.117535	0.23473
Eif4ebp1	ENSMUSG00000031490	0.117502	0.234863
Ndufb4	ENSMUSG00000022820	0.117431	0.235147
Aplp1	ENSMUSG00000006651	0.117321	0.235587
Farsb	ENSMUSG00000026245	0.117301	0.23567
Cdh19	ENSMUSG00000047216	0.117234	0.235937
Sbsn	ENSMUSG00000046056	0.117227	0.235966
Bhlha15	ENSMUSG00000052271	0.117122	0.236388
Dbi	ENSMUSG00000026385	0.117063	0.236627
Psme2b	ENSMUSG00000078153	0.11705	0.236678
Vimp	ENSMUSG00000075701	0.116976	0.236978
Cyp2f2	ENSMUSG00000052974	0.116943	0.237112
Ap3s1	ENSMUSG00000024480	0.116916	0.237221
Mpc2	ENSMUSG00000026568	0.116808	0.237659
Srm	ENSMUSG00000006442	0.11679	0.237731
D2Wsu81e	ENSMUSG00000039660	0.116727	0.237984
Qpctl	ENSMUSG00000030407	0.116678	0.238184
Cadm4	ENSMUSG00000054793	0.116545	0.238722
Ptprc	ENSMUSG00000026395	0.11652	0.238826
Cd244	ENSMUSG00000004709	0.11652	0.238826
Duox1	ENSMUSG00000033268	0.11652	0.238826
Gm15247	ENSMUSG00000086695	0.11652	0.238826
Abhd18	ENSMUSG00000037818	0.11652	0.238826
Gm12868	ENSMUSG00000085505	0.11652	0.238826
Txk	ENSMUSG00000054892	0.11652	0.238826
Gm14508	ENSMUSG00000085376	0.11652	0.238826
Folr2	ENSMUSG00000032725	0.11652	0.238826
RP24-143K11.2	ENSMUSG00000108456	0.11652	0.238826
Ppp1r3e	ENSMUSG00000072494	0.11652	0.238826
Ap1g2	ENSMUSG00000040701	0.11652	0.238826
Gramd1b	ENSMUSG00000040111	0.11652	0.238826
Gm12195	ENSMUSG00000085192	0.11652	0.238826
9430065F17Rik	ENSMUSG00000097360	0.11652	0.238826
Il7r	ENSMUSG00000003882	0.11652	0.238826
Osr2	ENSMUSG00000022330	0.11652	0.238826
Aqp2	ENSMUSG00000023013	0.11652	0.238826
2022-09-12	ENSMUSG00000022542	0.11652	0.238826
Kcnn2	ENSMUSG00000054477	0.11652	0.238826
Cyp17a1	ENSMUSG00000003555	0.11652	0.238826
Gm27029	ENSMUSG00000097239	0.11645	0.23911
Nup205	ENSMUSG00000038759	0.116417	0.239243
Zc3h18	ENSMUSG00000017478	0.116375	0.239412
Dennd4c	ENSMUSG00000038024	0.116362	0.239467
Wdr11	ENSMUSG00000042055	0.116344	0.239541
Aspg	ENSMUSG00000037686	0.116136	0.240387
Nif3l1	ENSMUSG00000026036	0.116136	0.240388
Sdha	ENSMUSG00000021577	0.116043	0.240766
Mfsd4	ENSMUSG00000059149	0.116031	0.240813
C530043A13Rik	ENSMUSG00000100444	0.115986	0.241
Bbc3	ENSMUSG00000002083	0.115821	0.241674
Sco1	ENSMUSG00000069844	0.115642	0.242404
Gna14	ENSMUSG00000024697	0.115642	0.242404
Cadps2	ENSMUSG00000017978	0.115495	0.243008
Rb1	ENSMUSG00000022105	0.115425	0.243295
Abhd17b	ENSMUSG00000047368	0.115334	0.243669
Mecr	ENSMUSG00000028910	0.11522	0.244142
Trappc5	ENSMUSG00000040236	0.115036	0.244899
Creld2	ENSMUSG00000023272	0.114997	0.245059
Ifne	ENSMUSG00000045364	0.114902	0.245451
Entpd7	ENSMUSG00000025192	0.114848	0.245678
Mrpl34	ENSMUSG00000034880	0.114829	0.245757
Slc35b1	ENSMUSG00000020873	0.114783	0.245946
Atp2b2	ENSMUSG00000030302	0.114742	0.246114
Desi1	ENSMUSG00000022472	0.114617	0.246633
Hmbs	ENSMUSG00000032126	0.114603	0.246693
Celf2	ENSMUSG00000002107	0.114578	0.246797
Fah	ENSMUSG00000030630	0.114435	0.247392
Ung	ENSMUSG00000029591	0.114369	0.247665
Ufc1	ENSMUSG00000062963	0.114228	0.248253
Aar2	ENSMUSG00000027628	0.114098	0.248795
Htra2	ENSMUSG00000068329	0.113965	0.249349
Ankrd26	ENSMUSG00000007827	0.113914	0.249561
Carnmt1	ENSMUSG00000024726	0.113648	0.250676
Gde1	ENSMUSG00000033917	0.113556	0.251065
Yipf5	ENSMUSG00000024487	0.113513	0.251246
Tfap2e	ENSMUSG00000042477	0.113512	0.251248
Ankrd33b	ENSMUSG00000022237	0.113463	0.251456
Gm37494	ENSMUSG00000108621	0.113279	0.252231
Spata13	ENSMUSG00000021990	0.113243	0.252383
Fcna	ENSMUSG00000026938	0.113237	0.252405
Zcchc3	ENSMUSG00000074682	0.113237	0.252405
Ovgp1	ENSMUSG00000074340	0.113237	0.252405
4933424M12Rik	ENSMUSG00000087289	0.113237	0.252405
Cnga4	ENSMUSG00000030897	0.113237	0.252405
Il27	ENSMUSG00000044701	0.113237	0.252405
Raet1d	ENSMUSG00000078452	0.113237	0.252405
Nmrk2	ENSMUSG00000004939	0.113237	0.252405
Slc18a1	ENSMUSG00000036330	0.113237	0.252405
Gm5615	ENSMUSG00000074448	0.113237	0.252405
Gm27253	ENSMUSG00000098340	0.113237	0.252405
Gm9945	ENSMUSG00000054450	0.113237	0.252405
Aloxe3	ENSMUSG00000020892	0.113237	0.252405
Apoo-ps	ENSMUSG00000049233	0.113237	0.252405
Dagla	ENSMUSG00000035735	0.113237	0.252405
Sec13	ENSMUSG00000030298	0.113234	0.25242
Mfsd12	ENSMUSG00000034854	0.113221	0.252473
Sfxn3	ENSMUSG00000025212	0.113219	0.252483
Ptch1	ENSMUSG00000021466	0.113118	0.252907
Thada	ENSMUSG00000024251	0.113102	0.252974
Fam221a	ENSMUSG00000047115	0.113067	0.253125
Mylpf	ENSMUSG00000030672	0.112996	0.253423
1700048O20Rik	ENSMUSG00000043773	0.112907	0.253802
Plpp5	ENSMUSG00000031570	0.112632	0.254968
Tspyl3	ENSMUSG00000074671	0.112598	0.255111
Snai3	ENSMUSG00000006587	0.112548	0.255324
Stard7	ENSMUSG00000027367	0.112306	0.256355
Foxn2	ENSMUSG00000034998	0.112294	0.256406
Polr2l	ENSMUSG00000038489	0.11228	0.256465
Zkscan6	ENSMUSG00000018347	0.112277	0.256477
Srbd1	ENSMUSG00000024135	0.112182	0.256882
Endog	ENSMUSG00000015337	0.112143	0.257048
Pde11a	ENSMUSG00000075270	0.11203	0.257532
Scn8a	ENSMUSG00000023033	0.111822	0.258423
Prkcz	ENSMUSG00000029053	0.111763	0.258675
BC023829	ENSMUSG00000073139	0.111531	0.25967
Cdca8	ENSMUSG00000028873	0.111515	0.25974
Ly6g6d	ENSMUSG00000073413	0.111389	0.26028
Katnbl1	ENSMUSG00000027132	0.111229	0.260971
Mut	ENSMUSG00000023921	0.111032	0.26182
Atp7a	ENSMUSG00000033792	0.110958	0.262143
Xrcc1	ENSMUSG00000051768	0.11091	0.262349
Rnf8	ENSMUSG00000090083	0.110583	0.263767
Morn2	ENSMUSG00000045257	0.110581	0.263775
Sgpp1	ENSMUSG00000021054	0.110553	0.263898
Taf8	ENSMUSG00000023980	0.110501	0.264126
Fam126b	ENSMUSG00000038174	0.110497	0.264143
Itpka	ENSMUSG00000027296	0.110418	0.264487
Rgs9	ENSMUSG00000020599	0.110418	0.264487
Tk2	ENSMUSG00000035824	0.110353	0.264766
Trib2	ENSMUSG00000020601	0.110193	0.265464
Tor1b	ENSMUSG00000026848	0.110189	0.265485
Cep57l1	ENSMUSG00000019813	0.110096	0.26589
Fam207a	ENSMUSG00000032977	0.110005	0.266287
L3mbtl1	ENSMUSG00000035576	0.109955	0.266505
Aim1l	ENSMUSG00000012123	0.109955	0.266505
Gm20548	ENSMUSG00000092354	0.109955	0.266505
Igf2	ENSMUSG00000048583	0.109955	0.266505
Disc1	ENSMUSG00000043051	0.109955	0.266505
Abhd15	ENSMUSG00000000686	0.109955	0.266505
Efcab11	ENSMUSG00000021176	0.109955	0.266505
4930451G09Rik	ENSMUSG00000022543	0.109955	0.266505
Synj1	ENSMUSG00000022973	0.109955	0.266505
1520401A03Rik	ENSMUSG00000043747	0.109955	0.266505
C2	ENSMUSG00000024371	0.109955	0.266505
Pygm	ENSMUSG00000032648	0.109955	0.266505
Gm17619	ENSMUSG00000097514	0.109916	0.266677
Nelfe	ENSMUSG00000024369	0.10976	0.267362
Depdc7	ENSMUSG00000027173	0.109617	0.267985
Gcsh	ENSMUSG00000034424	0.109578	0.26816
Rbm48	ENSMUSG00000040302	0.109546	0.268301
Elof1	ENSMUSG00000013822	0.109481	0.268586
Stx3	ENSMUSG00000041488	0.109472	0.268624
Mlf1	ENSMUSG00000048416	0.109386	0.269003
Slamf8	ENSMUSG00000053318	0.109072	0.270388
Tctn1	ENSMUSG00000038593	0.109072	0.270388
Eefsec	ENSMUSG00000033216	0.109027	0.270586
Fam96a	ENSMUSG00000032381	0.108972	0.270829
Cnppd1	ENSMUSG00000033159	0.108949	0.270932
Pla2g16	ENSMUSG00000060675	0.108892	0.271185
Zfp810	ENSMUSG00000066829	0.108872	0.271275
Mmgt1	ENSMUSG00000061273	0.108795	0.271615
Eaf1	ENSMUSG00000021890	0.108687	0.272094
Awat2	ENSMUSG00000031220	0.108668	0.272175
Mertk	ENSMUSG00000014361	0.108667	0.27218
Creb3l1	ENSMUSG00000027230	0.108622	0.272383
Dhrs7	ENSMUSG00000021094	0.108502	0.272917
Gusb	ENSMUSG00000025534	0.108493	0.272953
Fcer1g	ENSMUSG00000058715	0.10843	0.273236
Slc45a3	ENSMUSG00000026435	0.10829	0.273861
Hes1	ENSMUSG00000022528	0.108257	0.274005
Notch1	ENSMUSG00000026923	0.108217	0.274185
Efna1	ENSMUSG00000027954	0.10819	0.274306
Sertad2	ENSMUSG00000049800	0.10816	0.27444
Rinl	ENSMUSG00000051735	0.108153	0.274471
Traf2	ENSMUSG00000026942	0.108094	0.274733
Dcaf4	ENSMUSG00000021222	0.108043	0.27496
Gm15728	ENSMUSG00000086075	0.107925	0.27549
Alkbh3	ENSMUSG00000040174	0.107897	0.275614
Scyl1	ENSMUSG00000024941	0.107868	0.275746
Whrn	ENSMUSG00000039137	0.107839	0.275875
Tpd52	ENSMUSG00000027506	0.107705	0.276475
Wrb	ENSMUSG00000023147	0.107557	0.27714
Sec61g	ENSMUSG00000078974	0.107458	0.277582
Tsr2	ENSMUSG00000025264	0.10742	0.277754
AI480526	ENSMUSG00000090086	0.107146	0.278988
Nfyc	ENSMUSG00000032897	0.107131	0.279057
Cnpy2	ENSMUSG00000025381	0.107122	0.279097
Tescl	ENSMUSG00000055826	0.107031	0.279506
Oxa1l	ENSMUSG00000000959	0.106992	0.279686
Pter	ENSMUSG00000026730	0.106987	0.279709
Steap1	ENSMUSG00000015652	0.106976	0.279757
Cept1	ENSMUSG00000040774	0.106903	0.280087
Pcsk7	ENSMUSG00000035382	0.106873	0.280221
Fam175a	ENSMUSG00000035234	0.106837	0.280385
Rab40b	ENSMUSG00000025170	0.106821	0.280459
Cog3	ENSMUSG00000034893	0.106774	0.28067
Tsc1	ENSMUSG00000026812	0.106698	0.281016
Olfml2b	ENSMUSG00000038463	0.106673	0.28113
1700056E22Rik	ENSMUSG00000044854	0.106673	0.28113
Magix	ENSMUSG00000031147	0.106673	0.28113
Zmat1	ENSMUSG00000052676	0.106673	0.28113
1700112D23Rik	ENSMUSG00000091329	0.106673	0.28113
Mab21l3	ENSMUSG00000044313	0.106673	0.28113
Ephx4	ENSMUSG00000033805	0.106673	0.28113
Gdf3	ENSMUSG00000030117	0.106673	0.28113
C5ar2	ENSMUSG00000074361	0.106673	0.28113
Klk12	ENSMUSG00000044430	0.106673	0.28113
RP23-137A24.6	ENSMUSG00000108436	0.106673	0.28113
Nek5	ENSMUSG00000037738	0.106673	0.28113
Adgra2	ENSMUSG00000031486	0.106673	0.28113
Tenm3	ENSMUSG00000031561	0.106673	0.28113
Chrnb1	ENSMUSG00000041189	0.106673	0.28113
Sidt1	ENSMUSG00000022696	0.106673	0.28113
Rpn2	ENSMUSG00000027642	0.106621	0.281365
Ccdc71l	ENSMUSG00000090946	0.106535	0.281756
Yars2	ENSMUSG00000022792	0.106535	0.281756
Olfml3	ENSMUSG00000027848	0.106339	0.282645
Kbtbd7	ENSMUSG00000043881	0.106314	0.282761
Coq9	ENSMUSG00000031782	0.106241	0.283094
Tmed1	ENSMUSG00000032180	0.106218	0.2832
Atp5j2	ENSMUSG00000038690	0.106154	0.283492
Shroom4	ENSMUSG00000068270	0.106154	0.283492
Irx3os	ENSMUSG00000046413	0.106106	0.283711
Hccs	ENSMUSG00000031352	0.106057	0.283933
Efhd2	ENSMUSG00000040659	0.105968	0.284341
Sp2	ENSMUSG00000018678	0.105859	0.28484
Mlph	ENSMUSG00000026303	0.105672	0.285693
Sigirr	ENSMUSG00000025494	0.105632	0.285876
Amdhd2	ENSMUSG00000036820	0.105495	0.286508
Tmcc1	ENSMUSG00000030126	0.105311	0.287355
Lpar1	ENSMUSG00000038668	0.105202	0.287855
Oas1a	ENSMUSG00000052776	0.105158	0.288058
Slfn9	ENSMUSG00000069793	0.105145	0.288118
2810459M11Rik	ENSMUSG00000026227	0.105091	0.288364
Mettl21b	ENSMUSG00000080115	0.104856	0.28945
Ptrh2	ENSMUSG00000072582	0.104795	0.289735
Acaa2	ENSMUSG00000036880	0.104596	0.290656
Rab30	ENSMUSG00000030643	0.104472	0.291229
Usmg5	ENSMUSG00000071528	0.104392	0.291603
Cog7	ENSMUSG00000034951	0.104355	0.291776
Gm11175	ENSMUSG00000080058	0.104295	0.292055
Rnf139	ENSMUSG00000037075	0.104103	0.292949
Klhl13	ENSMUSG00000036782	0.103953	0.293647
Adrbk1	ENSMUSG00000024858	0.103928	0.293763
Lmbrd2	ENSMUSG00000039704	0.103914	0.293831
Ndufa4l2	ENSMUSG00000040280	0.103848	0.294139
Lfng	ENSMUSG00000029570	0.103729	0.294696
Cmc1	ENSMUSG00000039163	0.103722	0.294726
Gm15559	ENSMUSG00000086401	0.10362	0.295208
Ndufa4	ENSMUSG00000029632	0.103521	0.29567
Emc7	ENSMUSG00000055943	0.103497	0.295782
Zfp661	ENSMUSG00000034800	0.103391	0.296282
Cep95	ENSMUSG00000018372	0.103391	0.296282
Gm15648	ENSMUSG00000085425	0.103391	0.296282
Gm20939	ENSMUSG00000095193	0.103391	0.296282
1700066B19Rik	ENSMUSG00000073598	0.103391	0.296282
Tram1	ENSMUSG00000025935	0.103344	0.296499
Ero1lb	ENSMUSG00000057069	0.103336	0.29654
Haus4	ENSMUSG00000022177	0.103208	0.297139
Tmem39b	ENSMUSG00000053730	0.103182	0.297263
Fxn	ENSMUSG00000059363	0.103174	0.297301
Rictor	ENSMUSG00000050310	0.103135	0.297483
Npas2	ENSMUSG00000026077	0.10313	0.297509
Derl3	ENSMUSG00000009092	0.103116	0.297574
Atmin	ENSMUSG00000047388	0.102949	0.298358
Adgrb2	ENSMUSG00000028782	0.102861	0.298778
Atf5	ENSMUSG00000038539	0.102817	0.298983
Chid1	ENSMUSG00000025512	0.102772	0.299197
Tut1	ENSMUSG00000071645	0.10275	0.2993
Fam109a	ENSMUSG00000044134	0.102655	0.299751
Shroom1	ENSMUSG00000018387	0.1026	0.300008
Slc39a8	ENSMUSG00000053897	0.102327	0.301303
Casp7	ENSMUSG00000025076	0.102219	0.30182
Hist1h2ae	ENSMUSG00000069272	0.102066	0.302545
Hsf2	ENSMUSG00000019878	0.102016	0.302784
Gast	ENSMUSG00000017165	0.102008	0.302821
Tctn3	ENSMUSG00000025008	0.102008	0.302821
Tmtc4	ENSMUSG00000041594	0.101996	0.302878
Lcp1	ENSMUSG00000021998	0.101934	0.303175
Gpn2	ENSMUSG00000028848	0.101887	0.303401
Acadl	ENSMUSG00000026003	0.101725	0.304175
Pnpo	ENSMUSG00000018659	0.101708	0.304255
Rhbdf2	ENSMUSG00000020806	0.10157	0.304914
Mrpl49	ENSMUSG00000007338	0.101552	0.305002
Krr1	ENSMUSG00000063334	0.101495	0.305272
Inpp4b	ENSMUSG00000037940	0.101366	0.30589
Npdc1	ENSMUSG00000015094	0.101361	0.305916
Cipc	ENSMUSG00000034157	0.101275	0.306328
Ankrd13c	ENSMUSG00000039988	0.101232	0.306536
Ptcd3	ENSMUSG00000063884	0.101138	0.306985
Coprs	ENSMUSG00000031458	0.100951	0.307885
Ankrd49	ENSMUSG00000031931	0.10095	0.307891
Ecsit	ENSMUSG00000066839	0.100828	0.308479
Mfsd9	ENSMUSG00000041945	0.100775	0.308735
Irx2	ENSMUSG00000001504	0.100774	0.308738
Ppp1r1b	ENSMUSG00000061718	0.100676	0.309214
Tm9sf4	ENSMUSG00000068040	0.100417	0.310464
2300009A05Rik	ENSMUSG00000032403	0.100265	0.311205
Mamdc4	ENSMUSG00000026941	0.100108	0.311963
Gm9913	ENSMUSG00000053615	0.100108	0.311963
Ebf4	ENSMUSG00000053552	0.100108	0.311963
Vps37d	ENSMUSG00000043614	0.100108	0.311963
Zfp853	ENSMUSG00000093910	0.100108	0.311963
Zfp111	ENSMUSG00000087598	0.100108	0.311963
Gm15545	ENSMUSG00000087138	0.100108	0.311963
Pidd1	ENSMUSG00000025507	0.100108	0.311963
Gm5117	ENSMUSG00000093862	0.100108	0.311963
Gm16302	ENSMUSG00000090023	0.100108	0.311963
Slc36a3os	ENSMUSG00000085531	0.100108	0.311963
Gm17259	ENSMUSG00000097793	0.100108	0.311963
Dhh	ENSMUSG00000023000	0.100108	0.311963
Pdcd2	ENSMUSG00000014771	0.100092	0.31204
Bend5	ENSMUSG00000028545	0.100076	0.312119
Fbxl12	ENSMUSG00000066892	0.0999253	0.312853
Rad54l	ENSMUSG00000028702	0.0998144	0.313392
Hsd17b12	ENSMUSG00000027195	0.0997675	0.313621
P4hb	ENSMUSG00000025130	0.0997564	0.313675
Sfxn2	ENSMUSG00000025036	0.0994691	0.315078
Gng7	ENSMUSG00000048240	0.099461	0.315118
Zbtb41	ENSMUSG00000033964	0.0994531	0.315156
Ppox	ENSMUSG00000062729	0.0994301	0.315269
Timm50	ENSMUSG00000003438	0.0993557	0.315633
Tbc1d4	ENSMUSG00000033083	0.0993554	0.315634
Cyb561d1	ENSMUSG00000048796	0.0993512	0.315655
1110051M20Rik	ENSMUSG00000040591	0.0992776	0.316015
Klk11	ENSMUSG00000067616	0.0992648	0.316078
Rabepk	ENSMUSG00000070953	0.0992565	0.316119
Rbfa	ENSMUSG00000024570	0.0992074	0.316359
Tusc2	ENSMUSG00000010054	0.0991006	0.316883
Entpd5	ENSMUSG00000021236	0.0990438	0.317162
Cd68	ENSMUSG00000018774	0.0990373	0.317194
Ccdc74a	ENSMUSG00000041617	0.0989783	0.317484
Pop1	ENSMUSG00000022325	0.0989464	0.317641
Hspe1	ENSMUSG00000073676	0.0989393	0.317675
Rps6kb2	ENSMUSG00000024830	0.0989384	0.31768
Prss23os	ENSMUSG00000030623	0.0989222	0.317759
Gas2l3	ENSMUSG00000074802	0.0989166	0.317787
D11Wsu47e	ENSMUSG00000041623	0.0988914	0.317911
Itpr3	ENSMUSG00000042644	0.0987595	0.31856
Pex26	ENSMUSG00000067825	0.0987495	0.318609
Aox1	ENSMUSG00000063558	0.0986888	0.318908
Gba	ENSMUSG00000028048	0.0986367	0.319165
Atg2b	ENSMUSG00000041341	0.0985298	0.319692
Lefty1	ENSMUSG00000038793	0.0982138	0.321255
Ocel1	ENSMUSG00000002396	0.0981906	0.321369
Tacc3	ENSMUSG00000037313	0.0981001	0.321818
Commd9	ENSMUSG00000027163	0.0979923	0.322352
Pitpnm1	ENSMUSG00000024851	0.0979843	0.322392
Isyna1	ENSMUSG00000019139	0.0978695	0.322962
Cacna1a	ENSMUSG00000034656	0.0977926	0.323344
Glra1	ENSMUSG00000000263	0.0977749	0.323432
Rad23a	ENSMUSG00000003813	0.0977159	0.323726
Adat2	ENSMUSG00000019808	0.0976837	0.323886
Dxo	ENSMUSG00000040482	0.0975463	0.32457
Faap100	ENSMUSG00000025384	0.0975374	0.324614
Brd7	ENSMUSG00000031660	0.0974938	0.324832
Gipc1	ENSMUSG00000019433	0.0974934	0.324834
Rnaseh2c	ENSMUSG00000024925	0.0974045	0.325277
Ddx28	ENSMUSG00000045538	0.0973105	0.325747
Agmo	ENSMUSG00000050103	0.0972995	0.325802
Ano3	ENSMUSG00000074968	0.0972993	0.325803
Olfr920	ENSMUSG00000061039	0.0972993	0.325803
Mtrf1l	ENSMUSG00000019774	0.0972837	0.325881
Vill	ENSMUSG00000038775	0.0972837	0.325881
Hacd3	ENSMUSG00000033629	0.0970925	0.326837
Spdl1	ENSMUSG00000069910	0.0970753	0.326923
Tbc1d24	ENSMUSG00000036473	0.0968848	0.327878
A430106G13Rik	ENSMUSG00000098206	0.0968261	0.328172
Gm13184	ENSMUSG00000085043	0.0968261	0.328172
Gchfr	ENSMUSG00000046814	0.0968261	0.328172
Wdr76	ENSMUSG00000027242	0.0968261	0.328172
Med26	ENSMUSG00000045248	0.0968261	0.328172
Oxsm	ENSMUSG00000021786	0.0968261	0.328172
9930004E17Rik	ENSMUSG00000096052	0.0968261	0.328172
Robo3	ENSMUSG00000032128	0.0968261	0.328172
D930048N14Rik	ENSMUSG00000052563	0.0968261	0.328172
Gm12257	ENSMUSG00000086063	0.0968261	0.328172
1700092M07Rik	ENSMUSG00000090840	0.0968261	0.328172
Abhd17a	ENSMUSG00000003346	0.0967297	0.328656
Zfp729b	ENSMUSG00000058093	0.0966933	0.328839
Psmb10	ENSMUSG00000031897	0.0965831	0.329393
E430025E21Rik	ENSMUSG00000022350	0.0964622	0.330002
Amigo1	ENSMUSG00000050947	0.0964442	0.330093
Rgl3	ENSMUSG00000040146	0.0963895	0.330369
Usp50	ENSMUSG00000027364	0.0961947	0.331351
1810043G02Rik	ENSMUSG00000020284	0.0961608	0.331523
Tmem69	ENSMUSG00000055900	0.0961131	0.331764
Rbmx	ENSMUSG00000031134	0.0960866	0.331897
Pf4	ENSMUSG00000029373	0.096066	0.332002
Znrd1	ENSMUSG00000036315	0.0960043	0.332314
Dennd6b	ENSMUSG00000015377	0.0960027	0.332322
Ehd4	ENSMUSG00000027293	0.0959589	0.332544
Trappc6a	ENSMUSG00000002043	0.0959259	0.332711
Il4ra	ENSMUSG00000030748	0.0959112	0.332785
Esr1	ENSMUSG00000019768	0.0958425	0.333133
Zfp24	ENSMUSG00000051469	0.0958335	0.333178
Ggnbp1	ENSMUSG00000048731	0.0958221	0.333236
Tspan7	ENSMUSG00000058254	0.0956506	0.334106
D5Ertd579e	ENSMUSG00000029190	0.095609	0.334318
Ndst2	ENSMUSG00000039308	0.0955703	0.334514
Man1b1	ENSMUSG00000036646	0.0955334	0.334701
Csf1r	ENSMUSG00000024621	0.0954507	0.335122
Eef2kmt	ENSMUSG00000022544	0.0954244	0.335256
Sorbs3	ENSMUSG00000022091	0.0953035	0.335871
Frk	ENSMUSG00000019779	0.0952831	0.335975
Ptbp1	ENSMUSG00000006498	0.095151	0.336649
Rbm4	ENSMUSG00000094936	0.095122	0.336797
Atg2a	ENSMUSG00000024773	0.0949499	0.337676
Pop7	ENSMUSG00000029715	0.0949127	0.337866
Cdca7	ENSMUSG00000055612	0.094836	0.338258
Pex2	ENSMUSG00000040374	0.0948255	0.338312
Nudcd2	ENSMUSG00000020328	0.0948168	0.338356
Pard6b	ENSMUSG00000044641	0.0946142	0.339394
Vav2	ENSMUSG00000009621	0.0945474	0.339737
Gm42670	ENSMUSG00000107319	0.0945411	0.339769
Phospho2	ENSMUSG00000027088	0.0943858	0.340567
Sdhaf1	ENSMUSG00000074211	0.0941214	0.341927
Tmem167b	ENSMUSG00000068732	0.094113	0.341971
Ace	ENSMUSG00000020681	0.0940278	0.342409
Mks1	ENSMUSG00000034121	0.0940253	0.342422
Sap130	ENSMUSG00000024260	0.0939852	0.342629
Mipep	ENSMUSG00000021993	0.0938806	0.343169
5033430I15Rik	ENSMUSG00000038152	0.0938806	0.343169
Pigx	ENSMUSG00000023791	0.0938123	0.343522
Srp9	ENSMUSG00000026511	0.0937342	0.343926
Mapk13	ENSMUSG00000004864	0.0936606	0.344306
Gm26782	ENSMUSG00000097431	0.0936489	0.344366
Zfp35	ENSMUSG00000063281	0.0936109	0.344564
Slc35a2	ENSMUSG00000031156	0.0935955	0.344643
Gm37168	ENSMUSG00000103174	0.0935438	0.344911
Gm14168	ENSMUSG00000055494	0.0935438	0.344911
C2cd4d	ENSMUSG00000091648	0.0935438	0.344911
Fancg	ENSMUSG00000028453	0.0935438	0.344911
Gm7854	ENSMUSG00000085720	0.0935438	0.344911
Rbakdn	ENSMUSG00000104529	0.0935438	0.344911
Zfp114	ENSMUSG00000068962	0.0935438	0.344911
Cenpn	ENSMUSG00000031756	0.0935438	0.344911
Rpl10-ps3	ENSMUSG00000058443	0.0935438	0.344911
Prl6a1	ENSMUSG00000069259	0.0935438	0.344911
Mfsd7c	ENSMUSG00000034258	0.0935438	0.344911
Gm29994	ENSMUSG00000102713	0.0935438	0.344911
Fermt3	ENSMUSG00000024965	0.0935438	0.344911
Chchd1	ENSMUSG00000063787	0.0935248	0.345009
Gadd45gip1	ENSMUSG00000033751	0.0934349	0.345475
Gmnn	ENSMUSG00000006715	0.0933774	0.345774
Atp13a4	ENSMUSG00000038094	0.0933402	0.345967
Zfp2	ENSMUSG00000049321	0.0932523	0.346423
Faim2	ENSMUSG00000023011	0.0932523	0.346423
Casp6	ENSMUSG00000027997	0.0930631	0.347406
Phc2	ENSMUSG00000028796	0.0930358	0.347549
Ddhd1	ENSMUSG00000037697	0.093022	0.34762
Nupr1l	ENSMUSG00000095789	0.0929041	0.348234
Otx1	ENSMUSG00000005917	0.0929041	0.348234
Edem3	ENSMUSG00000043019	0.0928281	0.348631
2610044O15Rik8	ENSMUSG00000071302	0.0928187	0.34868
2310039H08Rik	ENSMUSG00000062619	0.0928142	0.348703
Eya3	ENSMUSG00000028886	0.0928004	0.348775
Trim25	ENSMUSG00000000275	0.0925906	0.34987
Pno1	ENSMUSG00000020116	0.0924707	0.350498
Sema4b	ENSMUSG00000030539	0.092415	0.350789
Nt5c2	ENSMUSG00000025041	0.0923412	0.351175
Pradc1	ENSMUSG00000030008	0.0922797	0.351498
Pex11a	ENSMUSG00000030545	0.0921851	0.351994
Esyt3	ENSMUSG00000037681	0.0921522	0.352167
Phactr1	ENSMUSG00000054728	0.0920794	0.352548
Gm10320	ENSMUSG00000092116	0.0919456	0.353252
Zfp868	ENSMUSG00000060427	0.0918397	0.353809
Herpud1	ENSMUSG00000031770	0.0918368	0.353824
Fdxr	ENSMUSG00000018861	0.0916974	0.354558
Casp9	ENSMUSG00000028914	0.0916315	0.354906
Bcl2l14	ENSMUSG00000030200	0.0915829	0.355162
Ddx19b	ENSMUSG00000033658	0.0915516	0.355327
Gm5113	ENSMUSG00000066647	0.0915515	0.355328
Pdf	ENSMUSG00000078931	0.0914465	0.355882
Cdk2	ENSMUSG00000025358	0.091407	0.356091
3110082I17Rik	ENSMUSG00000053553	0.0914042	0.356106
Card19	ENSMUSG00000037960	0.0913956	0.356151
Fam120c	ENSMUSG00000025262	0.0913568	0.356356
Gm15777	ENSMUSG00000085269	0.0912671	0.35683
Cr1l	ENSMUSG00000016481	0.0910569	0.357944
Amt	ENSMUSG00000032607	0.0910534	0.357962
Vars	ENSMUSG00000007029	0.091015	0.358166
Car4	ENSMUSG00000000805	0.0909615	0.35845
Slc38a3	ENSMUSG00000010064	0.0909375	0.358577
Tars	ENSMUSG00000022241	0.090921	0.358665
Nsun4	ENSMUSG00000028706	0.0908187	0.359208
Zfp874a	ENSMUSG00000069206	0.0908143	0.359231
Gm19325	ENSMUSG00000101365	0.0907669	0.359483
Zfyve19	ENSMUSG00000068580	0.0907483	0.359582
Zfp335	ENSMUSG00000039834	0.0906389	0.360164
A430046D13Rik	ENSMUSG00000097353	0.0906228	0.360249
Slc5a9	ENSMUSG00000028544	0.0905935	0.360405
Tmx1	ENSMUSG00000021072	0.090535	0.360717
Scamp2	ENSMUSG00000040188	0.0905042	0.360881
Tmem57	ENSMUSG00000028826	0.0903052	0.361942
P2ry1	ENSMUSG00000027765	0.0902616	0.362175
Dkk1	ENSMUSG00000024868	0.0902616	0.362175
Shq1	ENSMUSG00000035378	0.0902356	0.362314
Gstt2	ENSMUSG00000033318	0.0902249	0.362372
Trpt1	ENSMUSG00000047656	0.090176	0.362633
Cnot1	ENSMUSG00000036550	0.0900719	0.363189
2810474O19Rik	ENSMUSG00000032712	0.0900497	0.363308
Gnptg	ENSMUSG00000035521	0.0900133	0.363503
Rnaset2b	ENSMUSG00000094724	0.0899306	0.363945
2022-03-06	ENSMUSG00000039100	0.0898944	0.36414
Nme4	ENSMUSG00000024177	0.0898576	0.364337
Cblb	ENSMUSG00000022637	0.0898368	0.364448
Tmem94	ENSMUSG00000020747	0.0897102	0.365127
Cenpa	ENSMUSG00000029177	0.0895682	0.36589
Usb1	ENSMUSG00000031792	0.0895373	0.366056
Gpat4	ENSMUSG00000031545	0.0894892	0.366314
Ufsp2	ENSMUSG00000031634	0.0893815	0.366894
Hk1os	ENSMUSG00000085347	0.0893425	0.367104
Gm7808	ENSMUSG00000091460	0.0893162	0.367245
Nudt3	ENSMUSG00000024213	0.0893015	0.367325
Tnk2	ENSMUSG00000022791	0.0892566	0.367567
Snapc4	ENSMUSG00000036281	0.0892228	0.367748
Zbed4	ENSMUSG00000034333	0.0891953	0.367897
Clec16a	ENSMUSG00000068663	0.0891217	0.368294
Mfn2	ENSMUSG00000029020	0.089075	0.368546
Tnip2	ENSMUSG00000059866	0.0890246	0.368818
Agt	ENSMUSG00000031980	0.088994	0.368983
Fut4	ENSMUSG00000049307	0.0888273	0.369884
Gm26771	ENSMUSG00000097250	0.0886695	0.370739
Casp3	ENSMUSG00000031628	0.0885692	0.371282
Copz1	ENSMUSG00000060992	0.0884349	0.372011
Il1r1	ENSMUSG00000026072	0.0883857	0.372278
Dcaf15	ENSMUSG00000037103	0.0882385	0.373078
Cstf2t	ENSMUSG00000053536	0.0881455	0.373584
Sfi1	ENSMUSG00000023764	0.0881282	0.373678
Akap10	ENSMUSG00000047804	0.0880068	0.374339
Pigm	ENSMUSG00000050229	0.0877838	0.375556
Acacb	ENSMUSG00000042010	0.0877804	0.375574
Dpp4	ENSMUSG00000035000	0.0877408	0.37579
Rab3a	ENSMUSG00000031840	0.0877238	0.375884
Ormdl3	ENSMUSG00000038150	0.0875893	0.376619
Sumo2	ENSMUSG00000020738	0.0875514	0.376826
Cpq	ENSMUSG00000039007	0.0875384	0.376897
Tcaim	ENSMUSG00000046603	0.0873554	0.377899
Wdr83	ENSMUSG00000005150	0.087279	0.378318
Urm1	ENSMUSG00000069020	0.0872637	0.378402
Hepacam2	ENSMUSG00000044156	0.087261	0.378417
Tmem229b	ENSMUSG00000046157	0.0871859	0.378829
Chrna1os	ENSMUSG00000086382	0.0871714	0.378908
Ftl1	ENSMUSG00000050708	0.0871356	0.379105
Frmd8	ENSMUSG00000024816	0.0869885	0.379913
Nr1d1	ENSMUSG00000020889	0.0869855	0.37993
Gm15457	ENSMUSG00000087374	0.0869794	0.379963
Gm13523	ENSMUSG00000087496	0.0869794	0.379963
Gm17250	ENSMUSG00000097235	0.0869794	0.379963
Gm26850	ENSMUSG00000097724	0.0869794	0.379963
I830077J02Rik	ENSMUSG00000074342	0.0869794	0.379963
1700109H08Rik	ENSMUSG00000008307	0.0869794	0.379963
Tec	ENSMUSG00000029217	0.0869794	0.379963
Foxm1	ENSMUSG00000001517	0.0869794	0.379963
Casc1	ENSMUSG00000043541	0.0869794	0.379963
Lysmd4	ENSMUSG00000043831	0.0869794	0.379963
Trim30d	ENSMUSG00000057596	0.0869794	0.379963
Tmem254c	ENSMUSG00000072680	0.0869794	0.379963
Asb14	ENSMUSG00000021898	0.0869794	0.379963
Nt5dc2	ENSMUSG00000071547	0.0869794	0.379963
Pih1d2	ENSMUSG00000000167	0.0869794	0.379963
Hist1h2bg	ENSMUSG00000058385	0.0869794	0.379963
Plekhd1	ENSMUSG00000066438	0.0869794	0.379963
Serpina3g	ENSMUSG00000041481	0.0869794	0.379963
Nme3	ENSMUSG00000073435	0.0869794	0.379963
Cfb	ENSMUSG00000090231	0.0869794	0.379963
D6Wsu163e	ENSMUSG00000030347	0.0868352	0.380756
Mto1	ENSMUSG00000032342	0.0866617	0.381713
Calr4	ENSMUSG00000028558	0.0866477	0.38179
Adk	ENSMUSG00000039197	0.086644	0.38181
Dhrs7b	ENSMUSG00000042569	0.0863729	0.383307
Sgk3	ENSMUSG00000025915	0.0863105	0.383652
Adhfe1	ENSMUSG00000025911	0.0862008	0.384259
Unc13a	ENSMUSG00000034799	0.0861544	0.384516
Mthfd2	ENSMUSG00000005667	0.0861191	0.384712
Ccnb2	ENSMUSG00000032218	0.0859301	0.385759
Dtl	ENSMUSG00000037474	0.0858836	0.386018
Dcps	ENSMUSG00000032040	0.0858798	0.386039
Tcn2	ENSMUSG00000020432	0.0858464	0.386224
Trub2	ENSMUSG00000039826	0.0857364	0.386836
Prdm15	ENSMUSG00000014039	0.0856827	0.387134
Rabl2	ENSMUSG00000022621	0.0856324	0.387414
Sidt2	ENSMUSG00000034908	0.0855478	0.387884
Etv1	ENSMUSG00000004151	0.085348	0.388998
Eftud1	ENSMUSG00000038563	0.0853439	0.389021
A630077J23Rik	ENSMUSG00000086864	0.0853232	0.389137
Lztfl1	ENSMUSG00000025245	0.0852637	0.389468
Fbxl6	ENSMUSG00000022559	0.0851854	0.389906
Naa15	ENSMUSG00000063273	0.0850976	0.390396
Lyn	ENSMUSG00000042228	0.0850455	0.390688
Gga3	ENSMUSG00000020740	0.0848538	0.39176
Mpped2	ENSMUSG00000016386	0.0848193	0.391954
Tnf	ENSMUSG00000024401	0.0847573	0.392301
Prkcsh	ENSMUSG00000003402	0.0847465	0.392361
Mbd6	ENSMUSG00000025409	0.0847451	0.392369
Pak4	ENSMUSG00000030602	0.0847135	0.392546
1700021F05Rik	ENSMUSG00000019797	0.084601	0.393178
Atg4b	ENSMUSG00000026280	0.0845732	0.393334
Plcg2	ENSMUSG00000034330	0.0845314	0.393568
Rbm19	ENSMUSG00000029594	0.0845166	0.393652
Rnf170	ENSMUSG00000013878	0.0844853	0.393827
Ttc32	ENSMUSG00000066637	0.0843606	0.394528
Prr18	ENSMUSG00000055945	0.0842932	0.394908
Zfp101	ENSMUSG00000055240	0.0842724	0.395025
Mettl13	ENSMUSG00000026694	0.084185	0.395517
Pcgf2	ENSMUSG00000018537	0.0841577	0.39567
Atp5s	ENSMUSG00000054894	0.0841124	0.395926
C130013H08Rik	ENSMUSG00000105509	0.0841063	0.39596
Gstk1	ENSMUSG00000029864	0.0840939	0.39603
Slmo2	ENSMUSG00000016257	0.0840324	0.396377
Gm10250	ENSMUSG00000068706	0.083998	0.396571
Ggt5	ENSMUSG00000006344	0.0839934	0.396597
Clpx	ENSMUSG00000015357	0.0839286	0.396963
Eif2ak3	ENSMUSG00000031668	0.0838838	0.397216
Ica1	ENSMUSG00000062995	0.0837173	0.398156
Cox4i1	ENSMUSG00000031818	0.0837054	0.398224
Fcmr	ENSMUSG00000042474	0.0836971	0.398271
Gm14133	ENSMUSG00000087029	0.0836971	0.398271
Zfp711	ENSMUSG00000025529	0.0836971	0.398271
2310003L06Rik	ENSMUSG00000007457	0.0836971	0.398271
Gm28050	ENSMUSG00000099061	0.0836971	0.398271
Fam71f2	ENSMUSG00000079652	0.0836971	0.398271
4732471J01Rik	ENSMUSG00000053714	0.0836971	0.398271
Ryr1	ENSMUSG00000030592	0.0836971	0.398271
Rsf1os2	ENSMUSG00000086993	0.0836971	0.398271
Tm6sf2	ENSMUSG00000036151	0.0836971	0.398271
Rtbdn	ENSMUSG00000048617	0.0836971	0.398271
Gm26739	ENSMUSG00000097702	0.0836971	0.398271
Iqch	ENSMUSG00000037801	0.0836971	0.398271
Hmga1-rs1	ENSMUSG00000078249	0.0836971	0.398271
Vwa5b2	ENSMUSG00000046613	0.0836971	0.398271
Wdr27	ENSMUSG00000046991	0.0836971	0.398271
Pmvk	ENSMUSG00000027952	0.0834973	0.399402
Isg15	ENSMUSG00000035692	0.0834397	0.399728
1110001J03Rik	ENSMUSG00000019689	0.0834021	0.399941
Bmp2	ENSMUSG00000027358	0.0833698	0.400125
Ppa2	ENSMUSG00000028013	0.0833503	0.400235
Mcur1	ENSMUSG00000021371	0.0833281	0.400361
Mdfic	ENSMUSG00000041390	0.0832898	0.400579
Thop1	ENSMUSG00000004929	0.0831602	0.401315
Ndufb6	ENSMUSG00000071014	0.0830532	0.401923
Prdm4	ENSMUSG00000035529	0.0829535	0.40249
Rhbdd3	ENSMUSG00000034175	0.0829451	0.402537
Zfp97	ENSMUSG00000095990	0.0829215	0.402672
Tlcd1	ENSMUSG00000019437	0.0829044	0.40277
Rnmt	ENSMUSG00000009535	0.0828757	0.402933
Pmpca	ENSMUSG00000026926	0.0826971	0.403951
Alg8	ENSMUSG00000035704	0.0825743	0.404652
Ttpa	ENSMUSG00000073988	0.0825108	0.405014
Ciart	ENSMUSG00000038550	0.0824992	0.40508
Elp3	ENSMUSG00000022031	0.0824904	0.405131
Dido1	ENSMUSG00000038914	0.0824871	0.40515
Aldh1a3	ENSMUSG00000015134	0.0824654	0.405274
Gng5	ENSMUSG00000068523	0.0824073	0.405606
Khsrp	ENSMUSG00000007670	0.0823672	0.405835
Atp5k	ENSMUSG00000050856	0.0822654	0.406418
Zbtb48	ENSMUSG00000028952	0.0820889	0.407428
Gbp7	ENSMUSG00000040253	0.0820596	0.407596
Madd	ENSMUSG00000040687	0.0820562	0.407616
Spata2	ENSMUSG00000047030	0.0819831	0.408035
Gm13546	ENSMUSG00000086862	0.0819386	0.408291
Slain1	ENSMUSG00000055717	0.0819386	0.408291
Tomm40l	ENSMUSG00000005674	0.081928	0.408352
Rnf126	ENSMUSG00000035890	0.0818401	0.408857
2010315B03Rik	ENSMUSG00000074829	0.0818088	0.409036
Srrt	ENSMUSG00000037364	0.0817881	0.409155
Mfsd10	ENSMUSG00000001082	0.0815831	0.410334
Ube2s	ENSMUSG00000060860	0.0815542	0.410501
Timm22	ENSMUSG00000020843	0.0814352	0.411186
Vstm4	ENSMUSG00000050666	0.0814311	0.411209
Xylt2	ENSMUSG00000020868	0.081423	0.411256
Pycr1	ENSMUSG00000025140	0.0813844	0.411479
Bend7	ENSMUSG00000048186	0.0813467	0.411696
Foxk2	ENSMUSG00000039275	0.0812411	0.412305
Slfn8	ENSMUSG00000035208	0.081221	0.412422
Grhpr	ENSMUSG00000035637	0.0811851	0.412629
Larp4b	ENSMUSG00000033499	0.0810907	0.413175
1500026H17Rik	ENSMUSG00000097383	0.0810489	0.413416
L2hgdh	ENSMUSG00000020988	0.0810035	0.413679
Sharpin	ENSMUSG00000022552	0.0809725	0.413858
Samhd1	ENSMUSG00000027639	0.0808893	0.414339
Alg6	ENSMUSG00000073792	0.0808474	0.414582
Taok2	ENSMUSG00000059981	0.0808424	0.414611
Acss1	ENSMUSG00000027452	0.0808196	0.414743
Gm13594	ENSMUSG00000086881	0.0808056	0.414824
A130010J15Rik	ENSMUSG00000079144	0.0807981	0.414868
Crnde	ENSMUSG00000031736	0.0807979	0.414869
Msmo1	ENSMUSG00000031604	0.0807466	0.415166
Birc5	ENSMUSG00000017716	0.080732	0.415251
Rnft2	ENSMUSG00000032850	0.0807277	0.415276
Gm17638	ENSMUSG00000097057	0.0807277	0.415276
9330020H09Rik	ENSMUSG00000091050	0.0807277	0.415276
Nos3	ENSMUSG00000028978	0.0806829	0.415536
Kif22	ENSMUSG00000030677	0.080548	0.416318
B3gnt3	ENSMUSG00000031803	0.0805112	0.416532
Mycbp	ENSMUSG00000028647	0.0804546	0.416861
Pag1	ENSMUSG00000027508	0.0804293	0.417008
Rgsl1	ENSMUSG00000042641	0.0804149	0.417091
Gm37986	ENSMUSG00000104212	0.0804149	0.417091
Bloc1s6os	ENSMUSG00000085633	0.0804149	0.417091
2010310C07Rik	ENSMUSG00000101268	0.0804149	0.417091
M1ap	ENSMUSG00000030041	0.0804149	0.417091
Map4k1	ENSMUSG00000037337	0.0804149	0.417091
B230322F03Rik	ENSMUSG00000097509	0.0804149	0.417091
RP24-185P7.1	ENSMUSG00000109284	0.0804149	0.417091
Gm16143	ENSMUSG00000087030	0.0804149	0.417091
Mmp27	ENSMUSG00000070323	0.0804149	0.417091
Gm11431	ENSMUSG00000087407	0.0804149	0.417091
Strada	ENSMUSG00000069631	0.0804149	0.417091
5033403F01Rik	ENSMUSG00000096932	0.0804149	0.417091
Serpina11	ENSMUSG00000063232	0.0804149	0.417091
Camk2n2	ENSMUSG00000051146	0.0804149	0.417091
Gm19412	ENSMUSG00000101438	0.0804149	0.417091
Edem2	ENSMUSG00000038312	0.0803157	0.417668
Sirt5	ENSMUSG00000054021	0.0802797	0.417878
Haus2	ENSMUSG00000027285	0.080252	0.418039
Lcorl	ENSMUSG00000015882	0.0802066	0.418303
Slc2a1	ENSMUSG00000028645	0.0801706	0.418513
Sfxn1	ENSMUSG00000021474	0.0801538	0.41861
Tango6	ENSMUSG00000041949	0.0800715	0.41909
Fahd1	ENSMUSG00000045316	0.0800534	0.419195
Gstt3	ENSMUSG00000001665	0.0800129	0.419431
Tmc5	ENSMUSG00000030650	0.0800127	0.419432
Clcn5	ENSMUSG00000004317	0.079898	0.420102
Irs3	ENSMUSG00000047182	0.079898	0.420102
Hist1h3d	ENSMUSG00000099583	0.0798153	0.420584
Dis3l2	ENSMUSG00000053333	0.0797853	0.42076
Gm27187	ENSMUSG00000099201	0.0797747	0.420821
Ndufa9	ENSMUSG00000000399	0.0797582	0.420918
C030039L03Rik	ENSMUSG00000057093	0.0797385	0.421033
Dhodh	ENSMUSG00000031730	0.0797251	0.421111
E130102H24Rik	ENSMUSG00000086782	0.0796379	0.421621
Ssfa2	ENSMUSG00000027007	0.0796178	0.421739
Gm9828	ENSMUSG00000048603	0.0796098	0.421785
Glyr1	ENSMUSG00000022536	0.0795544	0.422109
4430402I18Rik	ENSMUSG00000064202	0.0795034	0.422408
Pla2g12a	ENSMUSG00000027999	0.0794696	0.422606
RP23-44H21.1	ENSMUSG00000108569	0.0794413	0.422771
Plaa	ENSMUSG00000028577	0.0792851	0.423687
Eef2k	ENSMUSG00000035064	0.0791928	0.424229
Zdhhc3	ENSMUSG00000025786	0.0791844	0.424278
Nmt2	ENSMUSG00000026643	0.0791455	0.424506
Etv6	ENSMUSG00000030199	0.0791192	0.424661
Samd10	ENSMUSG00000038605	0.079113	0.424697
Wdr53	ENSMUSG00000022787	0.0790907	0.424828
Pdxk	ENSMUSG00000032788	0.0790811	0.424884
Uso1	ENSMUSG00000029407	0.0790266	0.425205
Dyrk3	ENSMUSG00000016526	0.0789261	0.425795
Snx14	ENSMUSG00000032422	0.0788483	0.426254
Rgs3	ENSMUSG00000059810	0.0788186	0.426428
Phc1	ENSMUSG00000040669	0.0788186	0.426428
Sp3os	ENSMUSG00000063714	0.0787722	0.426701
D3Ertd254e	ENSMUSG00000033883	0.0787695	0.426717
Eif2b5	ENSMUSG00000003235	0.0787368	0.42691
Wnt5b	ENSMUSG00000030170	0.0786393	0.427485
Slc1a1	ENSMUSG00000024935	0.0786346	0.427512
Gm20324	ENSMUSG00000100199	0.0785077	0.428261
Pank3	ENSMUSG00000018846	0.0785074	0.428262
Gm11423	ENSMUSG00000085175	0.0784874	0.42838
Ptcd2	ENSMUSG00000021650	0.0784563	0.428564
Cldn23	ENSMUSG00000055976	0.0784181	0.428789
Qtrt1	ENSMUSG00000002825	0.0783703	0.429072
Cdyl2	ENSMUSG00000031758	0.0782943	0.429521
Slc25a23	ENSMUSG00000046329	0.0782898	0.429547
Crls1	ENSMUSG00000027357	0.0782606	0.42972
Prpf39	ENSMUSG00000035597	0.078196	0.430102
Cxxc1	ENSMUSG00000024560	0.0779948	0.431293
Gtf3c6	ENSMUSG00000019837	0.0779693	0.431445
Cbx8	ENSMUSG00000025578	0.0779429	0.431601
Mdn1	ENSMUSG00000058006	0.077798	0.43246
Cldn1	ENSMUSG00000022512	0.077778	0.432579
Atp1b1	ENSMUSG00000026576	0.0777102	0.432982
Mak16	ENSMUSG00000031578	0.0776872	0.433118
Zfp958	ENSMUSG00000058748	0.0776699	0.433221
Ppif	ENSMUSG00000021868	0.0775635	0.433853
Padi4	ENSMUSG00000025330	0.0775307	0.434048
St3gal1	ENSMUSG00000013846	0.0774796	0.434352
Hist1h4a	ENSMUSG00000060093	0.0772295	0.435841
Gm26642	ENSMUSG00000097680	0.0771326	0.436419
Guca2a	ENSMUSG00000023247	0.0771326	0.436419
Acvr2b	ENSMUSG00000061393	0.0771326	0.436419
Mrps18b	ENSMUSG00000024436	0.0771326	0.436419
Prosc	ENSMUSG00000031485	0.0771172	0.436511
[truncated: 11,484 more rows]
