# Supplementary material for: Subfunctionalized expression drives evolutionary retention of ribosomal protein paralogs Rps27 and Rps27l in vertebrates
Source: eLife. 2023 Jun 12;12:e78695. doi: 10.7554/eLife.78695 (PMC10313321; doi:10.7554/eLife.78695)
Supplement: Supplementary file 3. [file elife-78695-supp3.xlsx]

## Sheet: sample_metadata
clone_id	sequencing_batch	genotype
2b12	L1	Rps27-FLAG
2c3	L2	Rps27-FLAG
2c4	L3	Rps27-FLAG
4a2	L1	Rps27l-FLAG
4a3	L2	Rps27l-FLAG
4b7	L3	Rps27l-FLAG
5a1	L1	WT
5a2	L2	WT
5a3	L3	WT

## Sheet: RPF_counts_per_million
gene_name_ensembl_ID	L1_2b12_IP_RPF	L1_2b12_total_RPF	L1_4a2_IP_RPF	L1_4a2_total_RPF	L1_5a1_total_RPF	L2_2c3_IP_RPF	L2_2c3_total_RPF	L2_4a3_IP_RPF	L2_4a3_total_RPF	L2_5a2_total_RPF	L3_2c4_IP_RPF	L3_2c4_total_RPF	L3_4b7_IP_RPF	L3_4b7_total_RPF	L3_5a3_total_RPF
Gnai3_ENSMUST00000000001	7.31455	7.2985	7.21148	7.33165	7.37061	7.19877	7.35704	7.21699	7.35958	7.10861	7.13946	7.22202	7.15965	7.23273	7.20176
Cdc45_ENSMUST00000000028	6.65817	6.88053	6.74352	6.90471	6.81314	6.60891	6.71369	6.84033	7.01898	6.76164	6.70903	6.92667	6.90048	7.08266	6.66538
Klf6_ENSMUST00000000080	5.75681	5.47199	5.64874	5.59566	5.44608	5.23307	5.11301	5.68974	5.78326	5.00421	5.22519	5.07222	5.02601	4.98612	4.96786
Scmh1_ENSMUST00000000087	3.30602	3.04235	2.87657	3.37132	3.21827	3.07526	2.48902	2.4621	3.19991	2.77483	2.23845	2.50479	3.14018	3.10685	3.17592
Cox5a_ENSMUST00000000090	8.54422	8.40589	8.63371	8.40578	8.41062	8.76582	8.48014	8.68935	8.41355	8.47715	8.84415	8.63019	8.90394	8.60809	8.50468
Ngfr_ENSMUST00000000122	4.49801	4.5028	4.24973	4.11914	3.98954	4.22959	3.98613	3.90267	4.09448	4.13818	4.22963	3.63467	3.95052	3.96072	4.44193
Fer_ENSMUST00000000129	5.21642	5.36428	5.19153	5.24579	5.35528	5.6315	5.62195	5.38267	5.49052	5.9101	5.76659	5.79501	5.66465	5.79194	5.60799
Actr2_ENSMUST00000000137	8.85027	8.87759	8.94939	8.91739	8.90256	8.88289	8.87938	8.93386	8.87878	8.82452	8.90222	8.88033	8.92988	8.89972	8.88982
Gna12_ENSMUST00000000153	3.55672	3.44898	3.51276	3.6509	3.98954	3.47862	3.77769	3.69288	3.49644	3.71038	3.64908	3.77997	3.33543	4.05977	3.96441
Sdhd_ENSMUST00000000175	6.80697	6.72025	6.82008	6.76148	6.76754	6.8064	6.55483	6.76476	6.75635	6.58718	6.76201	6.56243	6.73036	6.63673	6.67174
Ccnd2_ENSMUST00000000188	1.8227	2.22095	2.73035	2.24826	2.84949	5.16181	5.07093	1.80159	2.13049	5.33863	5.40053	5.16776	5.26527	5.36933	6.12279
Ncs1_ENSMUST00000000199	2.13873	2.57028	2.56762	2.46783	2.60593	1.39408	1.67709	2.62875	1.70866	1.81625	2.01018	1.35046	2.75957	1.76493	1.68332
Gmpr_ENSMUST00000000260	3.6592	3.75222	3.44405	3.54226	3.88409	3.63414	3.42364	3.47675	3.52764	3.96484	3.59514	3.83089	3.95052	4.32166	3.83448
Scpep1_ENSMUST00000000287	8.54477	8.46914	8.35289	8.2767	8.49698	8.49357	8.36297	8.44311	8.41041	8.53722	8.42248	8.32589	8.59055	8.48364	7.77718
Mnt_ENSMUST00000000291	5.36027	5.11593	5.42338	5.06126	5.27412	5.41569	5.20483	5.31907	5.4007	5.58218	5.46961	5.36493	5.72862	5.35826	5.52618
Hddc2_ENSMUST00000000304	5.2928	5.07278	5.35016	5.14855	4.98636	4.87149	4.95011	5.18278	5.19749	4.77132	5.01532	4.96991	5.09235	5.11674	4.84577
Tpd52l1_ENSMUST00000000305	3.85904	3.39745	4.16687	4.02998	3.79961	3.52479	3.90633	4.04706	3.61737	3.78181	3.72639	3.29108	4.06508	3.77329	3.69168
Cdh1_ENSMUST00000000312	9.98267	9.97739	9.7284	9.66519	9.91296	9.95039	9.88296	10.0886	10.0419	10.0295	9.89509	9.89773	9.77754	9.73728	10.113
Bcl6b_ENSMUST00000000326	2.61738	2.87661	2.97727	2.9288	2.98317	1.5805	2.06788	1.89178	2.42369	1.70304	2.09035	1.75382	0.938543	1.69622	1.81164
Alox12_ENSMUST00000000329	1.98935	2.79931	2.61006	2.5976	2.93117	1.82151	2.01813	2.13279	2.72221	1.97097	1.52475	2.12419	2.24111	2.31595	1.87176
Rtca_ENSMUST00000000348	5.52766	5.74365	5.60744	5.65649	5.70795	5.69849	5.6052	5.48039	5.79613	5.65628	5.36068	5.71594	5.55913	5.61246	5.55855
Dbt_ENSMUST00000000349	5.6447	5.97217	5.84361	6.04001	6.23042	5.81919	6.1725	5.88356	6.09318	5.99972	5.76048	5.94894	5.80314	6.1668	6.19222
Dazap2_ENSMUST00000000356	5.72959	5.41699	5.81215	5.48261	5.46448	5.8099	5.34763	5.75127	5.4007	5.42595	5.74198	5.49166	5.65736	5.40206	5.37859
Mcts1_ENSMUST00000000365	5.15927	4.70708	4.95686	4.86901	4.69046	5.39097	5.32223	5.06171	4.88462	5.35277	5.77874	5.60815	5.42826	5.28995	5.28219
Trappc10_ENSMUST00000000384	3.1505	3.94401	3.53496	4.2532	4.27673	2.87595	4.02444	3.38655	4.20474	3.73938	2.94699	3.53582	3.22148	3.87005	3.99176
Ccm2_ENSMUST00000000388	2.68372	1.91377	2.11624	2.6878	2.73284	2.91114	2.41405	2.51982	2.48854	2.71768	1.63578	2.73612	2.70408	2.60545	2.82691
Galnt1_ENSMUST00000000430	5.00565	5.39087	5.09025	5.30874	5.566	4.93271	5.27004	5.26945	5.57133	5.54571	5.07565	5.1411	5.17631	5.64928	5.38376
Mkrn2_ENSMUST00000000449	5.57212	5.42559	5.43523	5.41819	5.34041	5.58323	5.37753	5.51628	5.19263	5.34807	5.52836	5.21963	5.51949	5.25455	5.21415
Raf1_ENSMUST00000000451	5.70983	6.02123	5.69383	6.21957	6.24647	5.86028	6.16395	5.61226	6.13935	6.17976	5.98156	6.18906	5.70761	6.13146	6.17442
Plin2_ENSMUST00000000466	5.74521	5.46784	5.77998	5.54024	5.28452	5.39097	4.88914	5.77517	5.89811	5.25072	5.35257	5.24489	5.46211	5.31881	4.58348
Mcm7_ENSMUST00000000505	9.77606	9.95027	9.87072	9.89044	9.81123	9.96486	10.0549	9.90893	9.91618	10.0173	10.0129	10.1513	9.94585	9.98511	10.0262
Grasp_ENSMUST00000000543	4.61313	4.70001	4.96506	4.88816	4.39661	4.27081	4.09812	4.17831	4.50822	3.94008	4.19378	4.35627	4.72514	4.71804	3.97815
Acvr1b_ENSMUST00000000544	5.33985	5.52097	5.1985	5.30399	5.5745	4.61825	4.8822	5.40581	5.52571	4.79223	4.602	4.76695	5.12441	5.0835	5.01528
C1d_ENSMUST00000000594	5.11788	4.796	5.09772	4.88816	4.86689	5.39097	5.28063	4.96113	5.01692	5.44808	5.61899	5.41586	5.62037	5.33019	5.25987
Gm2a_ENSMUST00000000608	5.10583	4.95297	5.02117	4.56227	5.12588	4.85352	4.38981	5.11885	5.01692	5.01611	4.76964	4.54092	4.96829	4.77746	4.96096
Clcn4_ENSMUST00000000619	3.12685	3.432	2.84138	2.71665	3.03335	2.15081	2.37506	2.57531	2.82623	1.86969	2.37275	2.37355	1.27958	2.06659	2.4068
Hk2_ENSMUST00000000642	7.855	8.20386	8.15393	8.33311	8.43998	8.0174	8.28162	7.93286	8.14345	8.30901	7.94092	8.2398	7.94379	8.10892	8.17852
Kat2b_ENSMUST00000000724	5.60245	5.68397	5.8076	5.78806	5.59553	5.34023	5.68707	5.48764	5.66899	5.66008	5.34442	5.60328	5.56693	5.83252	5.59467
Rab5b_ENSMUST00000000727	4.00889	4.26474	4.43817	4.37585	4.50728	4.06748	4.37011	4.34724	4.32504	4.39667	4.17552	4.61059	4.21156	4.61944	4.37079
Rpl13_ENSMUST00000000756	10.1037	9.98159	10.2975	10.0485	10.0592	10.3488	10.0649	10.3662	9.98558	10.0576	10.453	10.2101	10.3907	10.0855	10.1267
Chmp1a_ENSMUST00000000759	5.5049	5.31884	5.28617	5.24083	5.10843	5.34668	5.18241	5.39042	5.16809	5.14632	5.40053	5.28805	5.41103	5.28995	5.12433
Serpinf1_ENSMUST00000000769	3.34754	3.62358	2.84138	3.21831	3.45761	3.19431	3.68508	3.56164	3.63179	3.78181	3.10972	3.16445	3.22148	3.65155	4.0836
Tubgcp3_ENSMUST00000000776	4.59601	5.17323	4.72554	5.28485	5.1658	4.5968	4.96331	4.64829	5.27766	4.82642	4.602	5.13436	4.28904	4.96438	4.82311
Polr3d_ENSMUST00000000793	5.35519	5.20854	5.50435	5.35076	5.27933	5.2261	5.05251	5.46578	5.32282	5.05122	5.47709	4.79287	5.05956	4.91231	5.0994
Ddx3x_ENSMUST00000000804	9.7509	9.66264	9.86717	9.66589	9.65947	9.91182	9.7182	9.91331	9.67825	9.68882	9.89125	9.76354	9.90298	9.74234	9.74828
Txnrd3_ENSMUST00000000828	3.88747	4.04793	3.98535	4.09736	3.96389	4.38785	4.39955	3.96633	4.11517	4.10514	4.1193	4.23547	3.99744	3.93112	4.45181
Necab3_ENSMUST00000000895	2.89449	2.87661	2.73035	3.00095	1.71758	2.91114	2.45202	2.95591	2.58066	2.62749	2.55332	2.80566	1.67551	2.64245	2.88641
Pxmp4_ENSMUST00000000896	3.57431	3.57802	3.32171	3.57414	3.32286	3.77451	3.38491	3.4473	3.21915	3.95251	3.45075	3.70915	3.71815	3.78988	3.72466
Dlg3_ENSMUST00000000901	4.25784	4.29322	4.01723	4.04143	3.92454	3.95396	4.06175	4.49844	4.23341	4.02497	4.31553	4.19717	4.28904	4.08686	4.28496
Mmp11_ENSMUST00000000924	6.75199	6.86322	6.78115	6.8258	6.75077	6.55152	6.61045	6.73461	6.68551	6.41138	6.46021	6.50348	6.7199	6.70826	6.49904
Smarcb1_ENSMUST00000000925	8.17197	8.04619	8.10191	8.01227	8.01122	8.28723	8.05135	8.14488	8.00692	7.93264	8.19548	8.14907	8.04218	8.02298	8.02234
Hip1r_ENSMUST00000000939	4.70384	5.27668	4.12359	4.89449	4.78137	4.40029	5.14234	4.52687	5.01692	5.29045	4.24722	5.05804	4.04288	4.68296	5.02854
Nsun5_ENSMUST00000000940	5.21642	5.36428	5.14899	5.1591	5.12009	5.499	5.47756	5.00221	5.17304	5.36678	5.37675	5.37641	5.05956	5.15565	5.35245
Top1mt_ENSMUST00000000958	3.24141	3.191	2.94448	3.09186	3.00848	2.83988	2.25132	2.91348	2.92326	2.56406	2.43549	2.06869	2.75957	2.78161	2.48587
Oxa1l_ENSMUST00000000985	7.07758	7.32287	7.09679	7.17413	7.20533	7.18086	7.40743	6.83181	7.12476	7.37546	6.99334	7.3885	7.17504	7.31952	7.45611
Heatr6_ENSMUST00000001002	5.4957	5.64767	5.6022	5.59566	5.60386	5.34023	5.85943	5.55129	5.65846	5.60206	5.63244	5.65601	5.41103	5.50106	5.5722
Ilf2_ENSMUST00000001042	8.4214	8.33119	8.48488	8.37614	8.33009	8.57056	8.45231	8.48989	8.33967	8.36008	8.66267	8.47074	8.6459	8.4779	8.46803
S100a6_ENSMUST00000001051	3.96954	3.96776	4.20889	4.07525	3.82832	4.337	4.23508	4.46944	4.46052	4.55185	4.13829	4.0036	3.57081	3.28118	3.62337
Ern1_ENSMUST00000001059	2.39781	2.90149	2.91093	2.5976	3.05781	2.76492	2.87174	2.99714	2.99197	2.71768	2.85818	2.80566	3.05402	2.64245	3.29048
Sec24b_ENSMUST00000001079	6.51063	6.63568	6.74352	6.82082	6.62344	6.61158	6.55265	6.55992	6.69585	6.52191	6.60029	6.4824	6.48492	6.60896	6.47501
N4bp3_ENSMUST00000001080	5.38541	5.34627	5.42931	5.52808	5.46448	5.55569	5.4913	5.34325	5.39648	5.76605	5.76659	5.72942	5.77649	5.87588	5.93829
Rmnd5b_ENSMUST00000001081	5.27138	4.99402	5.05996	5.13258	5.19916	5.70352	5.64262	4.8753	5.07614	5.77658	5.72325	5.67936	5.47874	5.48077	5.77472
Zfp276_ENSMUST00000001092	1.41744	1.81248	1.63082	1.73087	1.65484	1.5805	1.85766	1.37095	1.70866	2.01906	1.63578	1.60572	1.42397	1.62407	1.98497
Slc46a1_ENSMUST00000001126	3.85904	4.03675	3.68144	3.42476	3.6142	2.91114	3.19646	3.15117	3.41537	3.14361	3.45075	2.83921	3.00893	3.30445	2.9713
Poldip2_ENSMUST00000001127	6.49223	6.53594	6.43079	6.55129	6.48379	6.45943	6.50378	6.55992	6.46355	6.45356	6.4374	6.44475	6.55325	6.64359	6.51797
Pcbp3_ENSMUST00000001148	4.60459	4.47821	4.66644	4.34846	4.67474	4.48447	4.55592	4.48401	4.67074	4.35042	4.65568	4.34463	4.44951	4.34429	4.29597
Araf_ENSMUST00000001155	5.10583	5.33262	5.16331	5.23586	5.22098	4.94124	5.21037	5.24399	5.33168	5.39894	4.96305	5.10707	4.96829	5.39123	5.34186
Cnnm3_ENSMUST00000001166	4.42231	4.71412	4.32808	4.16173	4.41565	4.337	4.40924	4.33121	4.15567	4.57617	4.56038	4.59102	4.5315	4.48332	4.47137
Ankrd39_ENSMUST00000001172	1.8227	2.0084	1.85909	1.26789	1.11718	1.66539	1.04322	1.70537	2.13049	1.92122	1.12882	1.25425	1.55521	1.19665	1.98497
Pcnt_ENSMUST00000001179	7.31847	8.11294	7.42412	7.90275	8.17317	7.62952	8.37537	7.63774	8.10648	8.47661	7.56477	8.30353	7.80891	8.26162	8.3918
Col6a2_ENSMUST00000001181	2.43681	3.01981	3.04069	3.13526	2.84949	1.74556	2.37506	2.95591	2.89961	2.35511	1.92529	1.52555	1.88963	1.38306	1.30145
Gmcl1_ENSMUST00000001185	3.6592	3.7106	3.96914	4.31111	4.02717	3.59139	4.11005	3.74221	4.08403	4.08268	3.70108	4.29713	3.66101	4.19042	4.19369
Snrnp27_ENSMUST00000001186	5.91362	5.69112	5.74709	5.6034	5.70795	5.68839	5.50942	5.80449	5.71036	5.46554	5.72325	5.30616	5.82282	5.63099	5.27664
Anxa4_ENSMUST00000001187	5.57649	5.29087	5.73755	5.5362	5.66084	5.08685	5.16537	5.64505	5.4007	5.11347	5.33622	4.98498	5.43679	5.16203	5.00189
Ocrl_ENSMUST00000001202	5.06908	5.25271	5.23285	5.35994	5.27933	4.82612	5.11893	5.0123	5.51017	5.18372	4.96305	5.10707	5.12441	5.1428	5.04822
Agpat3_ENSMUST00000001240	4.00889	4.59718	3.85026	4.30161	4.81045	3.40647	4.04942	3.94542	4.6567	4.28308	3.70108	4.0616	4.06508	4.07338	4.49067
Gatd3a_ENSMUST00000001242	5.2108	5.57609	5.33759	5.35994	5.27933	4.92412	5.0401	5.18278	5.20233	4.85982	4.81754	5.13436	4.80644	5.13633	5.19663
Uhrf1_ENSMUST00000001258	9.8008	9.69946	9.67162	9.59311	9.53517	9.88635	9.74282	9.83519	9.6981	9.82969	10.0042	9.86858	9.78883	9.70813	9.80479
Lsr_ENSMUST00000001279	6.06752	6.31999	6.05804	6.07106	6.36634	6.18536	6.15246	6.19833	6.34378	6.30386	5.98156	6.15282	5.76297	5.96984	6.29185
Gramd1a_ENSMUST00000001280	3.80045	4.2743	3.98535	4.08635	4.21284	3.75527	4.44733	4.10478	4.41953	4.60008	3.45075	4.14446	3.92647	4.42082	4.25141
Ckb_ENSMUST00000001304	8.18061	8.14584	8.27673	8.17835	8.18709	8.63644	8.41195	8.59096	8.45724	8.76935	8.81937	8.70432	8.37095	8.19315	8.60107
Efnb2_ENSMUST00000001319	3.24141	3.2308	2.5239	3.06967	2.42977	3.16546	3.30418	2.95591	2.92326	2.82979	2.66226	2.77131	2.24111	1.89326	3.05147
Sp1_ENSMUST00000001326	8.54645	8.37514	8.49341	8.32786	8.28355	8.60455	8.4293	8.47811	8.39622	8.50275	8.54223	8.36457	8.4352	8.29323	8.38085
Itgb7_ENSMUST00000001327	5.611	5.83364	5.2992	5.28003	5.566	5.35309	5.40682	5.12816	5.42989	5.69751	5.22519	5.50218	5.25565	5.28995	5.62992
Rrp15_ENSMUST00000001339	6.34113	6.19226	6.34546	6.26667	6.18119	6.46832	6.38858	6.44544	6.25803	6.41588	6.41033	6.35482	6.37373	6.22589	6.4555
Rnd2_ENSMUST00000001347	2.58303	2.0084	2.33442	2.6283	2.60593	1.89366	2.41405	2.13279	2.35578	2.27815	1.92529	1.82253	1.88963	1.83052	2.23433
Fbxo9_ENSMUST00000001402	3.10281	3.21103	3.15975	3.23835	3.12877	2.76492	2.72439	3.03721	2.89961	3.20727	2.98942	2.70005	2.9143	2.96802	3.05147
Vps50_ENSMUST00000001412	5.86083	6.10393	5.98333	6.12318	6.13021	6.43848	6.5978	5.91617	6.13935	6.33981	6.29241	6.49561	6.10043	6.22893	6.3721
Apbb3_ENSMUST00000001415	2.47478	2.82554	2.97727	2.9773	2.42977	2.68585	2.89948	2.82467	3.05756	2.82979	2.23845	2.50479	2.9143	3.15885	2.63209
Hars_ENSMUST00000001416	7.31324	7.33776	7.30969	7.34558	7.33479	7.19163	7.24526	7.31398	7.20535	7.20012	7.21069	7.26894	7.29022	7.33937	7.29116
Zmat2_ENSMUST00000001419	6.91276	6.80509	6.9372	6.79061	6.81673	7.06651	6.90719	7.11301	6.7889	6.87051	7.12288	6.85672	7.02742	6.88845	6.72568
Smg5_ENSMUST00000001451	5.62795	6.26594	5.78925	6.26667	6.13597	5.62622	6.41526	5.88356	6.18164	6.36794	5.66553	6.2558	5.57468	6.26792	6.30008
Cct3_ENSMUST00000001452	9.97234	10.1802	10.0725	10.1313	10.1107	10.1608	10.2995	10.1093	10.1344	10.2125	10.1928	10.3657	10.1556	10.2355	10.299
Tmem79_ENSMUST00000001456	3.84461	3.66775	3.53496	3.54226	3.51172	4.63939	4.46601	3.66757	3.83249	4.3691	4.58826	4.3329	3.85183	3.65155	4.59244
Kpnb1_ENSMUST00000001479	10.3388	10.1511	10.2997	10.1809	10.2596	10.4774	10.2533	10.393	10.2032	10.1987	10.4632	10.2963	10.2633	10.1713	10.2854
Npepps_ENSMUST00000001480	8.15453	8.29351	8.26599	8.29475	8.35436	8.25078	8.32191	8.32969	8.30633	8.36183	8.3541	8.45798	8.42128	8.48045	8.40965
Mrpl10_ENSMUST00000001485	5.5852	5.71236	5.44111	5.56822	5.57873	5.7864	5.78701	5.61888	5.60828	5.62166	5.5917	5.58362	5.57468	5.63099	5.57672
Cyp51_ENSMUST00000001507	7.92095	7.9172	7.90827	7.89882	8.03682	7.88428	7.83314	8.21098	8.17149	8.18208	8.01725	7.97417	8.46158	8.35513	8.17405
Tubb6_ENSMUST00000001513	6.4642	6.61327	6.54182	6.5908	6.67177	5.73332	6.08459	6.64343	6.68724	6.00868	5.97629	6.12248	5.82282	6.09188	5.9453
Afg3l1_ENSMUST00000001520	7.27609	7.25573	7.15707	7.0307	7.115	7.19699	7.19716	7.21262	7.15379	7.19227	7.13946	7.19312	7.42075	7.26866	7.13893
Vwa5a_ENSMUST00000001544	5.96454	5.90611	5.91305	5.72555	5.73474	5.82843	5.65488	6.18501	5.8801	5.60206	5.57786	5.55361	5.53548	5.33585	5.54014
Itga3_ENSMUST00000001548	6.65404	7.09114	6.97423	7.13726	7.04181	6.00981	6.39347	6.80884	7.16995	6.46662	6.08302	6.33143	6.34227	6.74912	6.15641
Itfg2_ENSMUST00000001559	4.02177	4.18594	3.88524	3.50965	3.96389	4.40029	4.27799	4.28202	4.24284	4.31233	4.04077	4.41307	3.77312	4.004	4.24005
Tulp3_ENSMUST00000001562	5.72172	5.51292	5.61267	5.54829	5.50061	5.6315	5.54498	5.54436	5.49052	5.48279	5.65239	5.43244	5.37595	5.60779	5.38891
Gtf2h4_ENSMUST00000001565	6.05505	6.01839	6.01131	6.04001	5.87551	5.96027	6.13214	5.88905	6.01279	6.2368	5.97101	6.1019	6.01749	6.1052	5.96958
Tubb5_ENSMUST00000001566	10.6454	10.7316	10.8686	10.777	10.839	10.8789	10.823	11.0254	10.7732	10.7915	10.9754	10.9841	10.9699	10.8624	10.902
Flot1_ENSMUST00000001569	4.19098	4.36651	4.01723	4.2532	4.55959	3.98731	4.37999	4.36309	4.51602	4.59215	4.04077	4.52039	3.95052	4.50357	4.21705
Ell2_ENSMUST00000001583	4.34241	4.70001	4.69629	5.03858	4.72141	3.93698	4.28852	4.24827	5.00588	4.57617	3.99984	4.58114	4.32627	4.74381	4.71238
Jup_ENSMUST00000001592	7.59007	7.67363	7.49235	7.52961	7.60749	8.06797	8.13834	7.59474	7.79733	8.37171	8.03001	8.18621	7.86691	7.96392	8.32281
Fkbp10_ENSMUST00000001595	5.45354	5.34174	5.46443	5.40051	5.58715	5.2261	5.14813	5.5719	5.43401	5.01017	4.54623	4.74941	5.25565	5.00755	5.07404
Nom1_ENSMUST00000001611	6.36154	6.26833	6.38265	6.50035	6.47019	6.45646	6.5262	6.32919	6.33939	6.37489	6.43357	6.48505	6.36033	6.39801	6.42322
Fxr1_ENSMUST00000001620	9.64743	9.5042	9.71722	9.55442	9.42258	9.78121	9.62468	9.76495	9.52896	9.52413	9.83709	9.64819	9.83316	9.5604	9.54086
Tnk1_ENSMUST00000001626	3.6592	4.12388	2.94448	3.57414	3.98954	3.59139	3.65284	3.71775	4.06289	4.15979	3.53911	3.77997	2.81301	3.13308	3.86438
Acap1_ENSMUST00000001631	4.75874	4.8092	4.51834	4.76925	4.55101	4.15816	4.49357	4.78403	4.59913	4.6158	4.3966	4.41307	4.5939	4.43142	4.39148
Ifrd1_ENSMUST00000001672	5.19383	5.34174	5.31852	5.48261	5.7978	5.87818	5.88046	5.61226	5.78649	5.82134	5.78478	5.90604	4.80644	5.15565	6.03019
Stk38l_ENSMUST00000001675	5.44878	5.68038	5.48738	5.66762	5.49614	5.84672	5.93845	5.58548	5.58992	5.81795	5.82634	5.94123	5.96534	5.96984	5.81739
Cabin1_ENSMUST00000001712	5.38042	5.98387	5.44698	5.91797	6.0441	5.47568	6.21176	5.22677	5.92472	6.15576	5.44695	6.13267	5.32167	5.89517	6.18631
Gstt1_ENSMUST00000001713	3.30602	2.79931	2.91093	2.71665	2.39181	2.51338	2.78515	3.07621	3.31166	2.65818	2.60882	2.96612	2.52351	2.2694	2.56083
Ddt_ENSMUST00000001716	3.73937	3.36204	3.51276	3.68049	3.43911	4.01992	3.55156	4.19612	3.51212	3.48921	3.99984	3.63467	3.63157	3.63329	3.35508
Ddx18_ENSMUST00000001724	8.95639	8.90284	8.94991	8.92746	8.85277	8.9558	8.85257	8.94246	8.83969	8.74587	8.9832	8.89586	8.87204	8.73447	8.83566
Eef1e1_ENSMUST00000001757	6.94354	6.73935	7.00038	6.81249	6.80052	7.03695	6.83359	7.05562	6.8457	6.84071	7.10369	6.87706	7.08558	6.91893	6.80105
Akt1_ENSMUST00000001780	3.48411	3.73848	3.62048	4.01844	3.92454	3.19431	3.66905	3.76625	3.81995	3.84988	3.10972	3.65365	3.4746	3.59605	3.67491
Tcirg1_ENSMUST00000001801	4.05974	3.87033	4.20889	4.41159	4.0878	4.21558	4.67308	4.37877	4.42783	4.69935	3.93618	4.30916	4.46628	4.45241	4.50972
Naglu_ENSMUST00000001802	2.68372	2.92594	3.00933	3.04712	3.15167	1.96237	2.06788	2.91348	3.18041	2.93382	2.09035	2.37355	3.44104	3.63329	2.32314
Coasy_ENSMUST00000001806	4.72762	4.6929	4.81895	4.80327	4.76661	4.11353	4.59038	4.81893	4.64252	4.81965	4.48823	4.66773	4.62411	4.94969	4.56539
Pabpc1_ENSMUST00000001809	10.5529	10.4823	10.7354	10.5414	10.5288	10.6195	10.4557	10.5961	10.3925	10.5018	10.7016	10.5531	10.6632	10.5013	10.4292
Smo_ENSMUST00000001812	3.64262	3.7106	3.51276	3.50965	3.91118	3.0439	2.84345	3.32312	3.63179	3.3075	2.23845	3.16445	3.00893	3.30445	3.49546
Crnkl1_ENSMUST00000001818	7.55727	7.6871	7.45791	7.63917	7.5676	7.80348	8.02719	7.30989	7.5774	7.77876	7.86032	7.9628	7.84784	8.0133	7.82738
Chordc1_ENSMUST00000001825	7.18169	6.9773	7.11716	7.04641	6.88665	7.14621	7.01892	7.2663	6.91959	6.86064	7.24613	7.0174	7.08286	6.96893	6.91794
Rtcb_ENSMUST00000001834	8.09101	8.30288	8.14944	8.29236	8.27836	7.9806	8.23882	8.2208	8.23489	8.15408	7.91638	8.20402	7.89661	8.05934	8.1748
Pwp1_ENSMUST00000001836	7.45057	7.62124	7.43744	7.58543	7.5782	7.53116	7.67558	7.42009	7.57553	7.51512	7.51116	7.6507	7.43998	7.49917	7.61735
Capns1_ENSMUST00000001845	8.42382	8.28586	8.69043	8.52324	8.56307	8.36066	8.08346	8.64302	8.38721	8.17745	8.30664	8.12206	8.57613	8.34043	8.18964
Aif1l_ENSMUST00000001920	3.87332	3.75222	4.12359	3.95931	3.72523	2.80289	3.08005	4.08579	3.6881	2.85651	2.66226	2.77131	2.70408	2.67852	2.03841
Tollip_ENSMUST00000001950	4.89799	5.15266	5.30567	5.07246	5.16017	4.60757	4.55592	4.81893	5.08665	4.89246	5.0458	4.93154	5.05956	4.74381	4.76088
Trmt1_ENSMUST00000001974	5.83917	5.92443	5.77066	6.01409	5.74607	6.10406	6.26339	5.74524	5.89513	6.31835	6.10731	6.29864	5.83578	6.15084	6.35903
Nacc1_ENSMUST00000001975	7.05896	7.62218	7.46081	7.62211	7.55047	7.33943	7.72488	7.29137	7.53005	7.59662	7.35967	7.66715	7.46106	7.62118	7.7484
Esam_ENSMUST00000002011	2.35774	2.09721	2.43227	2.79991	2.8212	1.39408	1.79994	2.51982	2.20956	0.843215	2.1663	1.44066	1.42397	1.76493	2.18779
Ccdc47_ENSMUST00000002043	7.66177	7.61185	7.61853	7.48732	7.57185	7.59477	7.52007	7.6968	7.52329	7.48118	7.57002	7.41238	7.55031	7.52664	7.38955
Map3k3_ENSMUST00000002044	3.64262	4.16555	3.49022	3.98325	3.85647	4.03595	3.68508	3.90267	3.88161	3.53954	3.35663	4.03289	3.4746	4.05977	3.51444
Taco1_ENSMUST00000002048	4.34241	4.40181	4.54045	4.64715	4.69046	4.083	4.50265	4.12351	4.42783	4.35042	4.17552	4.56117	4.48286	4.59133	4.31775
Ap4e1_ENSMUST00000002063	4.62162	5.12124	4.84583	4.96833	5.08483	4.62886	5.31194	4.85301	5.17304	5.18899	4.8409	5.04373	4.49926	4.84249	5.0994
Blvra_ENSMUST00000002064	4.47945	4.216	4.60482	4.50552	4.42508	3.56953	3.42364	4.24827	4.50038	3.91488	3.95771	3.45155	3.92647	4.07338	3.58797
Pdzd4_ENSMUST00000002080	6.07372	6.42666	5.8744	6.26667	6.40735	6.83874	7.19856	6.45287	6.64341	7.19096	6.90742	7.18008	6.53746	6.73634	7.27316
Abcd1_ENSMUST00000002084	3.70783	3.57802	3.55682	3.72378	3.67869	2.76492	3.12775	3.53389	3.6881	3.45465	2.90327	3.29108	3.05402	3.61479	3.62337
Ssr4_ENSMUST00000002090	5.78353	5.74365	5.67895	5.56822	5.86516	5.86478	5.88046	5.67076	5.57133	5.86147	5.67206	5.57369	5.7832	5.65382	6.00692
Bcap31_ENSMUST00000002091	8.02137	7.76879	7.85303	7.80705	7.85778	8.09691	7.93133	7.95395	7.86071	7.88882	8.04518	7.8241	8.13952	7.93904	7.84342
Kmt2a_ENSMUST00000002095	5.16509	5.91224	5.22605	5.79822	5.79052	5.18356	5.94845	5.19169	5.92179	5.9228	5.18011	6.00545	5.33086	5.872	5.97301
Ift46_ENSMUST00000002099	5.61526	5.51292	5.70855	5.65276	5.36511	5.51624	5.43553	5.59893	5.43812	5.36212	5.46961	5.49166	5.37595	5.33585	5.19074
Trappc6a_ENSMUST00000002112	3.6918	3.95594	4.04843	3.75193	3.36266	4.18716	3.80729	4.08579	3.76864	3.92753	4.10007	3.9737	4.43253	3.93112	3.56994
Supt6_ENSMUST00000002121	8.59412	8.57391	8.65793	8.67338	8.64353	8.75073	8.76479	8.55949	8.62212	8.79676	8.74624	8.82959	8.6912	8.80091	8.85859
Unc119_ENSMUST00000002127	3.80045	3.48234	3.4204	3.38936	3.12877	3.65504	3.17392	3.18724	3.39859	3.26824	3.51025	3.47308	3.1814	2.90852	3.22284
Rab34_ENSMUST00000002128	4.49801	4.34854	3.90241	4.26301	4.27673	4.09835	3.97314	4.52687	4.59177	4.23299	4.04077	4.21005	3.7459	3.96072	4.24005
Sdf2_ENSMUST00000002133	5.41988	5.41699	5.48167	5.28003	5.35034	5.43395	5.26472	5.4361	5.3139	5.53748	5.45454	5.31811	5.70054	5.71153	5.55397
Hsf2bp_ENSMUST00000002145	6.54895	6.41159	6.16509	6.23461	6.2142	6.56815	6.52397	6.45657	6.40596	6.54468	6.83072	6.65719	6.54143	6.4248	6.54592
Bbc3_ENSMUST00000002152	2.89449	2.66048	3.04069	3.09186	3.00848	3.54733	3.26205	3.32312	3.21915	2.95869	3.72639	3.38495	3.60151	3.23348	3.29048
Acp2_ENSMUST00000002172	4.42231	4.53495	4.06378	4.33921	4.51613	4.03595	4.37011	4.55475	4.59913	4.64675	4.29875	4.19717	4.34454	4.51359	4.40171
Sf3a1_ENSMUST00000002198	8.81601	8.71609	8.79644	8.70117	8.63897	8.87456	8.70217	8.7866	8.60759	8.59041	8.95805	8.77592	8.73685	8.60575	8.62965
Clgn_ENSMUST00000002259	6.41134	6.41159	6.40692	6.38149	6.54128	6.34828	6.40561	6.38461	6.35469	6.59909	6.27964	6.37498	6.3914	6.49475	6.37988
Napsa_ENSMUST00000002274	4.80418	4.86717	4.24973	4.01844	4.94762	5.2191	5.10111	4.96113	4.87859	4.87296	4.57438	4.52039	3.90202	4.59133	5.3734
Vrk3_ENSMUST00000002275	4.61313	4.76922	4.87222	5.05562	4.99271	4.89805	4.86823	5.0123	5.08665	4.99221	5.05582	5.02926	5.0032	4.81034	4.94705
Smg9_ENSMUST00000002280	4.32173	4.47821	4.24973	4.49723	4.30765	4.74067	4.82548	4.60894	4.6567	4.7853	4.75741	4.93154	4.38038	4.59133	4.63643
Plaur_ENSMUST00000002284	5.11187	5.27192	5.44111	5.29445	5.19916	5.40955	5.39712	5.79283	5.45445	5.59414	5.00502	5.02198	5.35808	5.38033	5.39916
Uchl3_ENSMUST00000002289	4.5072	4.29322	4.07896	4.42038	4.44376	4.72098	4.66502	4.60894	4.41953	4.20207	4.69468	4.64893	4.30778	4.49348	4.44193
Paxip1_ENSMUST00000002291	5.80604	6.06592	5.77998	6.07664	6.0952	5.68331	6.01019	5.75728	6.01279	5.89084	5.67206	6.05269	5.74246	6.01286	5.93477
Rmnd5a_ENSMUST00000002292	5.09977	4.99979	5.04457	4.86901	4.90782	5.07914	4.79626	5.12816	4.82309	4.94941	4.82926	4.93154	4.93252	5.09689	4.91169
Ppm1j_ENSMUST00000002298	4.87687	5.14226	5.23963	5.38262	5.2531	4.46092	4.73598	4.74826	5.09188	4.96791	4.56038	4.39062	4.75275	5.02166	4.91169
Kdm7a_ENSMUST00000002305	4.72762	4.53495	4.60482	4.7059	4.50728	4.21558	4.46601	4.7722	4.50038	4.51039	4.1193	4.35627	4.51547	4.51359	4.12124
Ppard_ENSMUST00000002320	2.27408	2.0084	2.33442	2.20819	2.42977	2.20853	2.01813	1.70537	2.35578	2.01906	2.37275	2.01098	2.24111	2.22131	1.74891
Def6_ENSMUST00000002327	4.04719	4.40181	4.4024	4.51377	4.36756	4.64985	4.4379	4.14201	4.06289	4.13818	4.13829	4.39062	4.39797	4.57229	4.07083
Ciao3_ENSMUST00000002350	4.40275	4.54288	4.4499	4.49723	4.59344	4.56401	4.54718	4.60894	4.66374	4.52712	4.54623	4.61059	4.63898	4.53342	4.53782
Angptl4_ENSMUST00000002360	5.11187	5.03955	4.58368	4.63964	5.02407	5.43395	5.17108	4.51273	4.70526	5.1245	5.37675	4.94701	5.1138	4.92738	5.32045
Cd320_ENSMUST00000002379	5.38541	5.3732	5.25308	5.21072	5.37488	5.48155	5.31194	5.44358	5.27306	5.34336	5.40053	5.23862	5.65736	5.56508	5.46894
Rec8_ENSMUST00000002395	4.07217	4.78935	4.63596	4.88816	4.62651	3.43092	4.09812	4.56849	4.91443	4.14902	3.25594	4.04732	4.06508	4.36657	3.69168
Gmpr2_ENSMUST00000002397	4.88395	4.86717	4.94033	4.93188	4.94762	4.76011	4.89604	4.83038	4.84183	5.01017	4.99464	5.24489	5.1138	5.28995	5.0931
Mdp1_ENSMUST00000002400	5.01856	4.6929	4.86348	4.78295	4.86689	4.77928	4.55592	4.99205	4.81679	4.71404	4.69468	4.57119	4.72514	4.74381	4.39148
Dhrs1_ENSMUST00000002403	4.63005	4.5586	4.69629	4.62449	4.55959	4.50765	4.61569	4.64829	4.6282	4.72857	4.6688	4.80989	5.1138	4.84249	4.64507
Ncan_ENSMUST00000002412	3.64262	3.91987	3.55682	3.29684	3.59762	3.91981	3.58611	3.66757	3.66022	3.92753	3.62236	3.4943	3.22148	2.96802	3.58797
Tmem161a_ENSMUST00000002413	4.5254	4.7488	4.20889	4.34846	4.64277	4.22959	4.40924	4.34724	4.82309	4.52712	4.13829	4.22282	4.49926	4.8817	4.41187
Borcs8_ENSMUST00000002418	3.2848	3.08641	3.49022	3.15647	3.1055	3.59139	3.30418	3.18724	2.82623	3.14361	3.45075	3.02562	2.70408	2.78161	2.79621
Snx9_ENSMUST00000002436	4.62162	4.64951	4.60482	4.88181	4.97356	4.77928	5.05868	4.80739	4.98356	5.01611	4.8409	4.99246	4.90817	5.05634	4.91883
Ranbp3_ENSMUST00000002445	7.16	7.0191	7.07991	7.00754	7.04945	7.31828	6.97232	7.14774	7.09514	7.08056	7.19491	7.05715	7.20032	7.12901	7.17219
Ndufa11_ENSMUST00000002452	6.9503	6.80344	6.81328	6.67958	6.69534	7.18266	6.97232	6.64667	6.63985	6.79482	7.02683	6.92667	6.91887	6.8255	6.74991
Nr2f6_ENSMUST00000002466	2.97617	2.87661	2.69136	2.90393	2.57238	3.27757	2.78515	2.51982	2.82623	3.14361	3.35663	3.16445	2.86454	2.93858	2.94355
Babam1_ENSMUST00000002473	4.75874	4.72112	4.99739	4.72733	4.74419	4.78877	4.88914	4.52687	4.73897	4.72857	4.62909	4.80989	4.76636	4.64701	4.74489
Braf_ENSMUST00000002487	5.79107	5.94252	5.65888	5.78125	5.77217	5.85578	5.77956	5.85021	5.80888	5.78703	5.70426	5.59839	5.46211	5.75441	5.62992
Hltf_ENSMUST00000002502	6.20658	6.6189	6.33916	6.54929	6.36389	6.74677	7.07322	6.48583	6.76128	7.06489	6.85675	7.12674	6.7234	7.00844	7.01777
Tle5_ENSMUST00000002518	5.95114	5.92443	6.08462	5.87382	6.10989	5.42789	5.33752	5.50203	5.72389	5.4956	5.51389	5.55866	5.70054	5.91042	5.49784
Prpf6_ENSMUST00000002529	8.2575	8.18119	8.14674	8.11542	7.99231	8.4531	8.39133	8.14946	8.07251	8.19063	8.43884	8.34864	8.30603	8.20942	8.08479
Rgs19_ENSMUST00000002532	4.17953	3.48234	4.03292	3.93496	4.02717	3.65504	3.76266	3.66757	3.9751	3.79569	3.59514	3.45155	3.60151	3.53834	3.8791
Snrpd1_ENSMUST00000002551	7.49512	7.53743	7.57902	7.52248	7.48773	7.74617	7.50885	7.71544	7.55959	7.48654	7.67287	7.60267	7.66192	7.58956	7.48407
Slc9a3r2_ENSMUST00000002572	3.3879	3.12916	3.39635	2.9773	2.60593	2.91114	3.12775	2.99714	2.99197	3.20727	3.38869	3.33878	3.4746	3.59605	3.15187
Scrib_ENSMUST00000002603	7.34818	7.41321	6.96199	7.03644	7.3019	7.16273	7.17463	7.20604	7.0768	7.39951	7.2263	7.27508	7.16222	7.27162	7.3465
Uck1_ENSMUST00000002625	4.65507	4.4105	4.56223	4.61686	4.37731	4.2843	4.02444	4.56849	4.41119	4.08268	4.36471	4.17105	4.41536	4.71804	3.89368
Mien1_ENSMUST00000002655	4.05974	3.96776	3.90241	4.04143	3.59762	4.0518	3.68508	4.14201	4.15567	3.61971	4.29875	3.53582	4.08694	3.78988	3.74087
Tgfb1_ENSMUST00000002678	3.87332	3.75222	3.44405	3.62068	3.87035	3.25035	3.00541	3.61557	3.43195	3.36445	3.18468	3.40749	2.81301	3.34989	3.12742
Ccdc97_ENSMUST00000002683	4.34241	4.19603	4.4024	4.48889	4.22368	4.55291	4.21314	4.23109	4.06289	4.28308	4.47335	4.14446	4.51547	4.52354	4.26268
Akap8_ENSMUST00000002699	7.93122	8.1156	8.12679	8.21673	8.07176	8.05131	8.15857	8.00915	8.0922	8.14327	8.04643	8.20563	8.04776	8.22246	8.22248
Pdcd2l_ENSMUST00000002710	6.41622	6.25392	6.20024	6.25689	6.0441	6.60891	6.37135	6.18501	6.1718	6.44698	6.52656	6.53965	6.26287	6.22893	6.3747
Gtf2f1_ENSMUST00000002733	7.1483	7.10994	7.05516	6.96608	6.89685	7.49538	7.25334	7.01606	6.9616	7.06632	7.35562	7.22678	7.21281	7.10105	7.05714
Clpp_ENSMUST00000002735	6.58194	6.56543	6.52529	6.3994	6.46334	6.76372	6.68209	6.41914	6.57226	6.51983	6.58307	6.64775	6.5295	6.44327	6.63968
Alkbh7_ENSMUST00000002737	5.22201	5.14747	5.24637	5.00972	5.23177	5.33376	5.24863	5.19169	5.13809	5.29045	5.33622	5.35916	5.29375	5.35269	5.24857
Cox16_ENSMUST00000002757	1.69984	1.24058	2.11624	1.4847	1.94435	1.74556	1.39469	1.97667	1.53533	1.21761	1.73888	1.25425	1.11912	1.46795	0.64937
Prkd1_ENSMUST00000002765	1.63425	2.44052	1.54593	1.98918	2.27151	1.89366	2.48902	2.13279	2.24753	2.77483	2.01018	2.54601	2.16094	2.64245	2.5969
Cse1l_ENSMUST00000002790	9.69369	9.65672	9.77518	9.71609	9.67041	9.78477	9.69761	9.73061	9.69938	9.64016	9.81477	9.71382	9.70562	9.64772	9.7071
Prkra_ENSMUST00000002808	3.80045	3.75222	4.09399	3.97133	3.85647	4.0518	3.77769	4.00726	3.83249	3.71038	4.28178	4.0036	4.39797	4.26348	3.77275
Fkbp7_ENSMUST00000002809	1.69984	1.58571	1.85909	1.4847	1.99588	2.15081	1.47064	2.05684	1.59545	1.92122	1.83509	1.82253	2.81301	2.2694	1.68332
Ykt6_ENSMUST00000002818	5.70983	5.66594	5.70855	5.73263	5.7423	5.68331	5.63025	5.59893	5.63717	5.55389	5.64577	5.55866	5.69343	5.57468	5.68122
Baz1b_ENSMUST00000002825	7.9741	8.13736	8.1744	8.23928	8.18778	8.12809	8.23814	8.13453	8.22481	8.29443	8.19774	8.31848	8.17184	8.19626	8.23826
Tmed5_ENSMUST00000002837	5.02497	5.02265	4.90668	4.91953	4.99904	5.23307	5.35766	5.21808	4.98356	5.12999	5.00502	5.12078	5.30312	5.13633	5.23147
Ppp2r5d_ENSMUST00000002839	6.99834	7.04165	7.03972	7.12789	6.89006	6.9529	6.8027	6.98822	6.96302	6.70763	6.84524	6.88511	6.83093	6.96893	6.65044
Pex6_ENSMUST00000002840	4.77404	5.16298	4.88955	5.23586	5.14883	4.5968	4.90291	4.91885	5.20715	5.56609	4.61561	5.24489	5.31242	5.42347	5.11814
Mrpl2_ENSMUST00000002844	7.03215	7.04305	6.87331	6.91875	6.80594	6.85916	6.96085	6.90132	6.98566	6.961	7.04455	6.96517	6.84704	6.88652	6.90361
Gnmt_ENSMUST00000002846	2.35774	2.66048	2.69136	2.43348	2.31273	1.39408	1.73982	2.33924	2.74893	2.42818	1.63578	2.17763	2.31705	2.17156	1.92948
Kdelr1_ENSMUST00000002855	6.64366	6.71148	6.62436	6.52706	6.69339	6.58459	6.45553	6.69131	6.65405	6.65343	6.55509	6.56744	6.91582	6.71044	6.68227
Btbd6_ENSMUST00000002880	3.1505	3.7106	3.32171	3.35306	3.45761	3.2226	3.12775	3.66757	3.21915	2.88274	3.14768	2.93543	2.64636	2.87783	2.76485
Sfrp4_ENSMUST00000002883	1.93591	2.05349	1.54593	1.73087	1.94435	2.64463	3.03073	1.80159	1.7621	2.42818	2.60882	2.58609	2.07605	2.17156	2.52384
Epdr1_ENSMUST00000002885	3.46538	3.12916	3.4204	3.15647	3.63059	2.72593	3.34511	3.4473	3.48059	3.3075	3.10972	2.50479	3.63157	3.49854	3.12742
Flii_ENSMUST00000002889	6.63949	6.99907	6.7459	6.93879	6.8451	6.51481	6.71369	6.71621	6.98847	6.81028	6.31761	6.62147	6.40016	6.62984	6.66326
Top3a_ENSMUST00000002891	5.12387	5.62545	5.23963	5.58004	5.70795	5.09452	5.67106	5.30272	5.71376	5.74475	5.16167	5.52812	5.33086	5.63099	5.72262
Qtrt1_ENSMUST00000002902	5.18813	5.44687	5.17042	5.37359	5.2689	5.37845	5.6261	5.35914	5.52184	5.80085	5.01532	5.64182	5.12441	5.36933	5.71853
Chaf1a_ENSMUST00000002914	6.97535	6.95371	7.04746	7.04499	6.99192	7.08589	6.98694	7.00347	6.9616	7.04761	7.12288	7.14362	6.94604	6.89995	6.95836
Adprh_ENSMUST00000002923	7.09445	7.1533	7.10423	7.17673	7.09742	7.18086	7.33942	7.17044	7.21616	7.19096	6.99073	7.21245	7.25686	7.31809	7.22067
Timmdc1_ENSMUST00000002925	5.31912	5.15783	5.33126	5.20055	5.04868	4.98319	4.9829	4.8753	5.07085	5.29045	4.95236	5.21963	4.8834	5.00044	5.13664
Pla1a_ENSMUST00000002926	2.8662	2.97364	2.56762	2.6878	2.42977	3.27757	3.15102	2.27365	2.96943	3.48921	2.76354	2.77131	1.98585	2.12003	3.51444
Il17ra_ENSMUST00000002976	3.85904	3.75222	3.62048	3.80663	3.91118	2.87595	3.68508	3.64181	3.74229	3.41924	2.81163	3.45155	3.22148	3.49854	3.3966
Arrdc2_ENSMUST00000002989	1.49339	2.05349	1.78694	1.26789	1.83541	1.05967	2.06788	2.40198	2.17057	1.21761	1.12882	2.327	1.42397	2.52849	2.76485
Timm44_ENSMUST00000003029	6.29942	6.18468	6.2175	5.96082	6.05325	6.06943	6.02916	6.30066	6.19141	6.16915	6.24065	6.11223	6.27721	6.0199	6.15339
Ap2a2_ENSMUST00000003038	7.59547	7.8533	7.79213	7.85732	7.85865	7.50837	7.7171	7.70459	7.75264	7.83106	7.66144	7.87857	7.73296	7.85289	7.76633
Pnkp_ENSMUST00000003044	5.43921	5.32345	5.23963	5.29445	4.96065	5.78166	5.6052	5.22677	5.23577	5.49984	5.76048	5.55866	5.53548	5.53588	5.34717
Bcam_ENSMUST00000003061	6.95198	6.72722	6.47164	6.47313	6.78961	7.70038	7.50773	6.74977	6.79051	7.5986	7.68422	7.55929	7.52651	7.49538	7.7474
Ap1m1_ENSMUST00000003117	5.03136	5.46367	5.60744	5.77097	5.58715	5.43395	5.75319	5.45841	5.71376	5.73038	5.44695	5.71594	5.47044	5.82851	5.67279
Rab8a_ENSMUST00000003121	5.96454	5.88443	5.97524	6.01989	6.05021	5.94337	5.97803	6.00474	5.92472	5.79396	5.96038	6.0238	5.95943	5.872	5.85511
Fam32a_ENSMUST00000003123	4.73547	4.37542	4.22263	4.35765	4.31781	4.8804	4.57325	4.49844	4.41953	4.53541	4.69468	4.47842	4.32627	4.54324	4.73683
Stk11_ENSMUST00000003152	3.57431	4.11327	3.57835	4.05279	4.22368	3.67565	4.06175	3.61557	3.95229	4.39667	3.59514	4.23547	3.26047	4.16521	4.3392
Efna2_ENSMUST00000003154	1.76258	1.75904	2.05612	1.8398	1.71758	1.89366	1.73982	1.23971	2.08927	1.92122	1.73888	1.52555	1.78654	2.40476	2.27942
Ppp5c_ENSMUST00000003183	7.23797	7.20293	7.29676	7.15318	7.10477	7.27166	7.11079	7.19058	7.25162	7.0257	7.13474	7.10276	6.9727	6.93765	6.97387
Cdk12_ENSMUST00000003203	7.56719	7.5986	7.72734	7.72688	7.57714	7.67885	7.7171	7.54349	7.5643	7.59662	7.76888	7.68801	7.75531	7.71208	7.63914
Sh3gl1_ENSMUST00000003268	6.6561	6.56543	6.76715	6.62545	6.41684	6.6407	6.37876	6.62711	6.52474	6.52191	6.58653	6.49561	6.56887	6.58541	6.6157
Irf3_ENSMUST00000003284	3.98278	3.80591	3.96914	3.69506	3.28193	3.88483	4.0861	3.92421	3.49644	3.76781	4.19378	4.08975	3.97417	3.75652	3.97815
Ranbp2_ENSMUST00000003310	9.22984	9.56311	9.25371	9.54263	9.45947	9.40589	9.78805	9.23621	9.54549	9.6851	9.41884	9.73987	9.41617	9.71303	9.71533
Dvl3_ENSMUST00000003318	4.57868	4.7488	4.68641	4.87542	4.87379	4.48447	4.62403	4.72391	4.64963	4.43262	4.65568	4.57119	4.46628	4.57229	4.46162
Abcf3_ENSMUST00000003319	5.86441	5.94551	6.25475	6.2246	6.1011	5.76252	5.98452	5.9946	6.09318	5.89407	5.91707	5.89412	5.82282	5.91798	5.78648
Eif2b5_ENSMUST00000003320	7.73888	7.76117	7.70059	7.72511	7.70457	7.73271	7.77254	7.69523	7.69799	7.71996	7.73966	7.68801	7.53448	7.53034	7.58517
Amph_ENSMUST00000003345	4.89799	4.86085	4.98131	4.98622	4.79598	4.62886	4.36016	5.20933	5.00588	4.7853	4.86389	4.42417	5.09235	4.81845	4.49067
Mrpl4_ENSMUST00000003386	6.67865	6.76329	6.71464	6.75106	6.5861	6.50621	6.62507	6.65957	6.60919	6.47311	6.46021	6.5371	6.53746	6.62753	6.62665
Ap1m2_ENSMUST00000003397	5.28213	5.79434	5.05996	5.35536	5.55745	5.16181	5.44498	5.61888	5.88913	5.46987	5.12407	5.49166	4.19152	4.47309	5.6558
Cyp4f39_ENSMUST00000003413	1.76258	1.58571	0.201974	1.61303	1.58925	1.74556	2.06788	1.23971	1.1902	1.29778	2.43549	1.95086	2.86454	2.01109	1.38634
Btbd2_ENSMUST00000003434	6.0891	6.0041	5.95068	5.8674	5.82655	6.07332	5.94179	5.81029	5.96231	6.08127	6.19151	6.1727	6.11114	6.16363	5.95923
Abhd17a_ENSMUST00000003436	3.0024	3.04235	2.73035	2.82662	3.05781	2.87595	3.24052	2.95591	2.77516	3.26824	2.60882	3.05448	2.96239	3.15885	2.73279
Mob3a_ENSMUST00000003438	3.6918	3.12916	3.7207	3.50965	3.4939	4.09835	3.36514	3.29033	3.14061	3.92753	3.91432	3.92765	3.85183	4.01815	3.62337
Fkbp11_ENSMUST00000003445	5.6195	5.25271	5.19153	5.12184	5.3894	4.87149	4.98937	5.44358	5.23577	5.26076	4.78176	4.52039	4.5315	4.63787	4.98157
Ddx23_ENSMUST00000003450	7.14977	7.21414	7.22349	7.24641	7.26562	7.38863	7.51223	7.23217	7.28167	7.44313	7.40152	7.50544	7.36593	7.49159	7.54303
Rnd1_ENSMUST00000003451	2.09063	2.25994	1.78694	2.6283	2.18536	2.02796	2.11597	1.97667	2.42369	1.97097	2.09035	2.27891	2.07605	1.95338	2.08994
Myo1g_ENSMUST00000003459	3.40766	3.90764	3.243	3.70949	4.11135	3.43092	3.91994	2.86976	3.64608	4.15979	3.45075	3.89611	3.44104	3.98972	3.62337
Ogdh_ENSMUST00000003461	7.41072	7.87308	7.60154	7.89567	7.78641	7.53681	7.9833	7.56592	7.86529	7.92398	7.40935	7.96089	7.63991	7.96574	8.0273
Elavl3_ENSMUST00000003501	1.8227	2.44052	1.9278	1.61303	1.7777	2.09069	1.96659	1.70537	1.40701	2.06561	1.73888	1.35046	2.31705	2.17156	1.92948
St8sia6_ENSMUST00000003509	3.24141	3.06455	3.15975	2.71665	3.45761	2.80289	2.33498	2.86976	2.58066	2.1107	2.71379	2.50479	2.75957	2.74806	2.76485
Fcgrt_ENSMUST00000003512	1.49339	2.09721	1.78694	1.55029	2.22908	2.20853	2.78515	1.70537	1.02514	2.49772	2.37275	2.17763	2.9143	2.67852	1.98497
Nosip_ENSMUST00000003513	6.70684	6.61327	6.80417	6.5908	6.51724	6.8569	6.72342	6.7285	6.55344	6.72767	6.87666	6.73723	6.82444	6.70826	6.67596
Rps11_ENSMUST00000003521	9.66498	9.49784	9.81286	9.53885	9.58124	9.98047	9.65856	9.95738	9.54358	9.64495	10.0228	9.76954	9.9376	9.6161	9.64251
Supt5_ENSMUST00000003527	8.31945	8.14714	8.26682	8.16337	8.01357	8.4176	8.21141	8.22839	8.07449	8.2403	8.37925	8.21205	8.3072	8.16084	8.23111
Paf1_ENSMUST00000003529	6.32823	6.51191	6.30405	6.22711	6.47019	6.57639	6.61045	6.25466	6.39965	6.52191	6.60712	6.61906	6.46419	6.37347	6.60246
Med29_ENSMUST00000003536	5.76449	5.72287	5.92149	5.722	5.58715	6.01386	5.64262	5.75127	5.56758	5.64483	6.0281	5.87807	6.04008	5.7028	5.80202
Ncstn_ENSMUST00000003550	7.21151	7.14682	6.96812	7.02061	7.07961	6.99451	7.13287	6.97796	7.08206	7.15643	7.03698	7.15865	7.0637	7.06403	7.13127
Phyhip_ENSMUST00000003561	2.31651	2.40616	2.47881	2.53417	2.39181	1.82151	1.85766	2.68028	2.35578	1.21761	2.09035	1.82253	1.98585	1.19665	1.21125
Gars_ENSMUST00000003572	9.4267	9.50774	9.52754	9.55891	9.58229	9.63529	9.63683	9.47697	9.52944	9.5788	9.60178	9.64878	9.66488	9.68476	9.68135
Tpm4_ENSMUST00000003575	5.86083	5.43839	5.78462	5.69688	5.70795	6.01386	5.6508	6.0738	5.6264	5.91646	5.82634	5.81623	5.80973	5.56025	5.69376
Prodh_ENSMUST00000003620	5.26056	5.62918	4.98131	5.24083	5.00534	5.17635	5.39225	5.13741	5.34925	5.56203	5.44695	5.42693	5.07057	5.12983	5.62556
Ess2_ENSMUST00000003621	5.22201	5.14747	5.23963	5.08358	4.96712	5.10216	4.84701	5.26102	4.97226	4.91805	4.86389	5.07926	5.21653	5.05634	4.83825
Slc25a1_ENSMUST00000003622	5.91707	6.1796	6.09586	6.23959	6.32664	5.91331	6.21728	6.158	6.3612	6.3978	6.14534	6.13267	6.07878	6.01639	6.25564
Ier3_ENSMUST00000003635	2.92223	2.92594	2.22946	0.916421	2.35281	2.64463	1.85766	2.51982	1.95802	2.53127	2.60882	1.82253	2.24111	2.06659	2.27942
Ercc1_ENSMUST00000003645	4.8337	4.77596	4.773	4.80327	4.61007	5.03993	4.79626	5.10006	4.85419	4.69195	4.93075	4.85159	4.89584	4.54324	4.60135
As3mt_ENSMUST00000003655	4.34241	4.40181	4.27632	4.31111	4.47133	4.29765	4.40924	4.28202	4.43607	4.21245	4.42779	4.32108	4.46628	4.46279	4.3392
Rnf215_ENSMUST00000003677	2.39781	2.57028	2.22946	2.43348	2.35281	1.4903	1.79994	1.89178	2.04683	2.23807	1.92529	2.27891	2.16094	1.69622	2.4068
Sec14l2_ENSMUST00000003681	3.10281	2.79931	3.26972	3.09186	2.98317	2.94549	2.11597	2.99714	3.18041	2.80257	2.71379	2.58609	2.07605	1.46795	2.99852
Aven_ENSMUST00000003705	4.62162	4.4105	4.86348	4.44646	4.65083	4.68076	4.54718	4.60894	4.52377	4.71404	4.85244	4.52039	4.77985	4.9933	4.64507
Aak1_ENSMUST00000003710	4.47008	4.5664	4.62566	4.72733	4.81762	4.47274	4.6073	4.28202	4.48457	4.45902	3.97893	4.27278	4.51547	4.35547	4.45181
Crot_ENSMUST00000003720	5.64053	5.72635	5.73755	5.79484	5.85473	5.77212	5.64262	5.72083	5.72726	5.86147	5.70426	5.79928	5.74933	5.91421	5.73481
Calb2_ENSMUST00000003754	2.31651	2.44052	2.11624	1.41599	1.7777	2.26402	1.13943	1.80159	1.86339	1.97097	2.09035	1.52555	1.27958	1.38306	1.87176
Ciao1_ENSMUST00000003759	5.9712	6.31537	6.08462	6.16566	6.10697	5.97281	6.29245	6.12584	6.24166	6.26948	6.0281	6.31662	5.97123	6.27088	6.36427
Man1a_ENSMUST00000003843	3.17377	3.21103	2.69136	2.5976	2.87723	2.60219	2.81459	2.77813	2.94653	2.95869	3.25594	3.13773	3.44104	3.10685	2.7
Itpkc_ENSMUST00000003850	3.70783	3.63845	3.83245	3.79315	3.81404	3.56953	3.79257	4.00726	3.88161	3.82304	4.04077	3.74499	3.85183	4.05977	3.95054
Shkbp1_ENSMUST00000003857	3.95618	4.16555	4.04843	4.3299	4.01474	4.22959	4.56461	3.94542	4.48457	4.47634	4.48823	4.60084	4.46628	4.58184	4.44193
Coq8b_ENSMUST00000003860	3.24141	3.46575	3.243	2.95326	2.98317	3.40647	3.26205	3.29033	3.5732	3.288	3.53911	3.31513	3.14018	3.34989	3.58797
Brd8_ENSMUST00000003876	7.96162	7.9248	7.99989	8.01736	7.90066	8.04736	8.01059	7.91281	7.90667	7.95985	8.05769	8.07619	8.13166	8.15765	8.03964
Farsa_ENSMUST00000003906	7.40213	7.31131	7.41068	7.29505	7.32223	7.59882	7.4873	7.25784	7.19202	7.40517	7.54	7.4989	7.43786	7.35199	7.40616
Gcdh_ENSMUST00000003907	4.80418	5.0673	4.88955	5.1591	5.2689	5.15449	5.31709	4.89724	5.07614	5.44368	4.7201	5.1411	5.32167	5.47052	5.25987
Dnase2a_ENSMUST00000003910	3.55672	3.432	3.64109	3.37132	3.93777	2.94549	2.84345	3.7899	3.76864	2.74654	3.03064	2.62509	3.99744	2.93858	3.55167
Rad23a_ENSMUST00000003911	6.19809	6.01554	6.0542	6.01409	5.98157	6.37057	6.02601	5.96892	5.90704	6.00271	6.20957	6.07399	6.07878	6.15405	6.13203
Calr_ENSMUST00000003912	9.81266	9.85797	9.77518	9.73583	9.99499	10.0502	10.0196	9.89843	9.79081	9.95203	10.077	10.1151	10.208	10.1481	10.2299
Nob1_ENSMUST00000003946	7.03692	6.98459	7.00635	7.04215	7.00612	7.09739	7.16609	6.99587	7.01898	7.14564	7.11811	7.03017	6.88808	6.94507	7.09231
Nqo1_ENSMUST00000003947	5.54561	5.30025	5.67396	5.58004	5.25838	5.86478	5.74938	5.32717	5.26845	5.39439	5.51389	5.84954	5.55129	5.59841	5.30418
Ppfia3_ENSMUST00000003961	1.76258	1.45739	1.45573	1.61303	1.7777	1.66539	1.31452	2.33924	2.28452	2.01906	2.01018	2.01098	1.42397	1.69622	1.46651
Gys1_ENSMUST00000003964	4.81901	4.95297	4.81895	4.86901	5.26365	5.61024	5.72245	5.00221	5.06023	5.67141	5.69788	5.86183	5.9051	5.78368	5.7549
Kpna1_ENSMUST00000004054	7.55616	7.52248	7.66958	7.62687	7.49782	7.58391	7.67458	7.54523	7.55864	7.52868	7.73343	7.60633	7.76721	7.80168	7.56937
Dzip1_ENSMUST00000004055	2.8079	3.10794	2.69136	3.17738	2.7629	2.51338	3.24052	2.57531	2.87556	3.14361	2.30716	3.29108	2.52351	3.10685	3.45673
Fam162a_ENSMUST00000004057	6.88835	6.63938	6.51695	6.41269	6.96631	6.87929	6.77489	7.02356	6.78407	6.71859	7.094	6.8991	6.83417	6.61595	6.3747
Rpl8_ENSMUST00000004072	10.3811	10.2567	10.5788	10.3193	10.3458	10.6843	10.3854	10.6593	10.269	10.4003	10.7363	10.5076	10.6785	10.41	10.4573
Ssbp2_ENSMUST00000004094	1.88041	1.96186	2.22946	1.61303	1.99588	2.09069	2.01813	2.13279	2.04683	1.58018	1.52475	1.35046	1.88963	1.95338	1.81164
Cux1_ENSMUST00000004097	4.07217	4.17578	4.16687	4.01844	4.01474	3.93698	4.11005	4.28202	4.41953	4.01314	3.93618	4.14446	3.92647	3.82248	4.27386
Fancl_ENSMUST00000004120	5.80231	5.98677	5.78925	5.68597	5.77954	6.15998	6.17817	6.01481	6.00727	6.02938	6.03318	6.10535	5.94753	5.55541	6.26968
Gstm5_ENSMUST00000004134	3.60887	3.39745	3.3719	3.25811	3.26102	2.72593	2.37506	3.35518	3.60279	2.56406	2.76354	2.80566	2.81301	2.44719	2.4068
Gstm1_ENSMUST00000004140	3.84461	3.79268	3.90241	3.57414	3.8977	4.31089	4.09812	3.88081	4.26151	4.18108	4.31553	4.18417	3.7459	3.90091	3.95054
Stat5b_ENSMUST00000004143	3.1505	2.66048	3.44405	3.50965	3.19641	1.89366	1.85766	2.95591	3.21915	2.46337	2.23845	2.54601	3.1814	2.48841	1.68332
Map3k11_ENSMUST00000004156	2.77784	3.2308	2.65128	3.31583	3.15167	2.46684	2.41405	2.40198	3.03602	3.03084	2.23845	2.872	2.3892	2.56749	2.52384
Hmox2_ENSMUST00000004172	6.07989	5.89686	6.06187	5.87702	5.98157	5.66281	5.52731	6.07861	5.78326	5.52087	5.69147	5.71142	5.53548	5.43406	5.21995
Cdip1_ENSMUST00000004173	4.68777	4.39307	4.74471	4.60919	4.07588	4.64985	4.38981	4.43985	4.13556	4.3691	4.53195	4.35627	4.46628	4.29867	4.1088
Cwc15_ENSMUST00000004200	6.65404	6.37875	6.63211	6.5908	6.52603	6.70978	6.46717	6.58041	6.41433	6.35394	6.67694	6.50871	6.63713	6.53219	6.2891
Col5a3_ENSMUST00000004201	2.47478	2.94999	2.80532	2.77269	2.22908	2.60219	2.62818	2.77813	2.80092	3.12175	2.09035	2.22916	3.09774	3.05291	2.79621
Dnmt1_ENSMUST00000004202	9.46758	9.6223	9.52615	9.61674	9.5237	9.61008	9.73394	9.52885	9.60451	9.80975	9.61497	9.78145	9.54957	9.69443	9.75328
Ppan_ENSMUST00000004203	7.38852	7.68083	7.49235	7.726	7.69583	7.5354	7.84389	7.50113	7.71503	7.85527	7.54	7.81465	7.54637	7.76755	7.81786
Eif3g_ENSMUST00000004206	8.47214	8.36791	8.51381	8.37387	8.30605	8.68744	8.50519	8.46623	8.25948	8.45547	8.68785	8.49199	8.51597	8.41915	8.36656
Hira_ENSMUST00000004222	2.09063	2.92594	1.45573	1.89133	2.27151	1.5805	2.01813	1.97667	2.42369	2.46337	2.43549	2.58609	2.07605	2.48841	2.63209
Dyrk2_ENSMUST00000004281	2.61738	2.63104	2.22946	2.90393	2.67078	2.15081	2.16251	1.37095	2.17057	2.06561	2.09035	2.22916	2.07605	2.71371	2.36558
Plxna3_ENSMUST00000004326	3.75488	4.31189	3.59957	3.75193	4.1798	3.52479	4.02444	3.64181	4.04144	4.45027	3.75126	4.04732	3.50739	4.10022	4.3392
G6pdx_ENSMUST00000004327	5.66537	5.44264	5.2992	5.49931	5.61214	5.68839	5.83808	5.4731	5.71036	5.74117	5.73577	5.86591	5.3936	5.51109	5.77865
Wars2_ENSMUST00000004343	2.71578	2.25994	2.65128	2.79991	2.9574	2.51338	2.56027	2.77813	3.39859	2.42818	2.55332	2.46236	2.31705	2.40476	3.02524
Phb2_ENSMUST00000004375	8.05465	8.17355	8.03535	8.07907	8.2388	8.19655	8.31162	8.00284	8.06787	8.28154	8.08608	8.27317	8.04078	8.16243	8.31741
Emg1_ENSMUST00000004379	6.66229	6.75479	6.61658	6.7068	6.68557	6.83874	6.77863	6.59726	6.71121	6.7634	6.81016	6.68513	6.70937	6.74912	6.69896
Lpcat3_ENSMUST00000004381	6.11638	6.30841	6.00735	6.17608	6.23847	6.0577	6.26339	5.9895	6.25803	6.21374	6.0281	6.10535	6.148	6.08182	6.25846
Atp6v1f_ENSMUST00000004396	5.89973	5.75393	5.97524	5.91487	5.84071	6.00981	5.74557	6.00474	5.9011	5.74117	5.88933	5.85365	6.05679	5.96984	5.57672
Utp20_ENSMUST00000004470	8.22445	8.92462	8.40127	9.01826	8.96247	8.57537	9.36623	8.12874	8.73834	9.22644	8.48499	9.25172	8.49773	9.09126	9.27229
Sin3b_ENSMUST00000004494	7.1081	6.87583	7.14268	6.8826	6.77678	7.32156	7.07322	7.18166	7.05287	7.0447	7.29135	7.13013	7.17758	7.0417	7.1251
Ddx56_ENSMUST00000004507	7.48702	7.30084	7.51066	7.27458	7.2067	7.61091	7.5323	7.35022	7.1798	7.38925	7.54357	7.3439	7.37484	7.26125	7.42635
Tmed4_ENSMUST00000004508	4.93931	4.61984	4.59429	4.52196	4.96065	4.76972	4.69699	4.85301	4.81679	4.69935	4.80571	4.67704	5.01465	5.00044	4.96786
Rps5_ENSMUST00000004554	9.91675	9.76763	10.1113	9.87492	9.92444	10.241	10.0069	10.157	9.832	9.95937	10.3294	10.0835	10.2136	9.93893	9.96366
Bid_ENSMUST00000004560	5.27677	4.84811	5.17042	4.93188	4.90782	5.14713	4.79626	4.99205	4.93784	4.71404	5.07565	4.93154	4.81956	4.62869	4.79233
Ralb_ENSMUST00000004565	4.42231	4.37542	4.4499	4.42038	4.26628	4.09835	4.48444	4.24827	4.64963	4.31233	3.89212	4.15782	4.1712	4.15245	4.36034
Tbccd1_ENSMUST00000004576	3.73937	3.90764	3.81442	4.01844	3.93777	3.33052	3.97314	3.81317	3.96374	3.76781	3.70108	3.88008	3.77312	3.73955	3.67491
Zfp110_ENSMUST00000004614	6.24279	6.1252	6.11808	6.19415	6.07138	6.37373	6.34132	6.18055	6.08534	6.21374	6.24065	6.37783	6.00032	6.0443	6.30554
Coro1c_ENSMUST00000004646	7.83141	7.97986	7.84305	7.92146	7.91996	7.77749	7.90163	7.82252	7.9825	7.83526	7.83437	7.94075	7.66556	7.74221	7.86577
Pnpla6_ENSMUST00000004681	6.01373	6.40725	5.96301	6.23212	6.40735	6.41722	6.76738	6.18501	6.41015	6.8868	6.27536	6.71255	6.15836	6.53219	6.92682
Mcoln1_ENSMUST00000004683	5.27138	5.3598	4.88955	5.28485	4.99271	5.13229	5.42603	4.99205	5.27306	5.50829	4.91982	5.16114	5.15577	5.19353	5.10568
Arhgef18_ENSMUST00000004684	4.96621	4.98823	4.94862	5.06687	5.17701	5.34668	5.59675	4.97151	5.24049	5.53748	5.84956	5.73389	5.89893	5.80423	5.76286
Pex11g_ENSMUST00000004686	2.27408	1.52298	1.9278	1.94108	1.89091	1.74556	1.39469	1.89178	2.08927	1.97097	1.52475	1.44066	1.78654	1.69622	1.6146
Etfb_ENSMUST00000004729	4.27945	4.5028	4.13816	4.04143	4.40616	4.46092	4.4379	4.46944	4.41953	4.76428	4.41228	4.67704	4.83255	4.28703	4.64507
Wwox_ENSMUST00000004756	3.05348	2.87661	2.69136	3.06967	2.7629	2.83988	2.59463	2.82467	3.21915	2.71768	2.71379	2.93543	1.88963	2.90852	2.08994
Cnn2_ENSMUST00000004784	6.25648	6.04095	6.28453	6.06266	5.84774	6.58731	6.22278	6.31703	6.25337	6.3818	6.64411	6.43381	6.16864	6.0443	6.24147
Polr2e_ENSMUST00000004786	7.60406	7.46523	7.44625	7.36507	7.3984	7.88428	7.65233	7.46486	7.29533	7.52139	7.77344	7.60876	7.71025	7.47245	7.63914
Mtfp1_ENSMUST00000004868	3.50261	3.65318	3.86786	3.52605	3.47587	3.30429	3.26205	3.32312	3.55817	3.07701	3.25594	3.26663	3.22148	2.78161	3.35508
Eif2b2_ENSMUST00000004910	6.37164	6.33376	6.40993	6.14988	6.25707	6.54032	6.23644	6.31296	6.17919	6.2645	6.38273	6.35482	6.2961	6.2044	6.20979
Traf6_ENSMUST00000004949	4.47008	4.54288	4.36572	4.56227	4.38699	4.15816	4.14524	4.2986	4.29815	4.08268	4.04077	4.32108	4.15059	4.26348	4.49067
Chmp2b_ENSMUST00000004965	5.03136	4.88599	4.99739	4.88181	4.94762	4.85352	4.34005	5.0123	5.04414	4.54365	4.54623	4.34463	4.46628	4.32166	4.38117
Plod3_ENSMUST00000004968	5.62795	5.72287	5.71342	5.71486	5.96873	5.91765	5.96495	5.9375	5.89513	6.01166	5.90049	5.86997	6.01749	5.92551	6.10411
Brpf3_ENSMUST00000004985	4.81901	4.92291	4.70611	4.95629	5.09668	5.2191	5.45903	4.91885	5.30942	5.58218	5.34442	5.54347	4.62411	4.81034	5.46894
Lbr_ENSMUST00000005003	9.64431	9.64779	9.52719	9.44174	9.58545	9.45329	9.42349	9.67295	9.59878	9.53088	9.49307	9.44595	9.57638	9.45745	9.57517
Prcc_ENSMUST00000005015	5.92395	5.9485	5.90028	5.85123	5.89261	6.06943	5.80545	5.91617	5.72389	6.03815	6.23184	6.0347	6.06232	5.95153	6.04005
Rrnad1_ENSMUST00000005016	1.76258	2.09721	2.11624	2.32523	1.65484	2.26402	2.01813	2.27365	2.13049	2.23807	2.1663	2.327	2.64636	2.67852	2.1397
Hdgf_ENSMUST00000005017	8.08489	7.87701	7.96045	7.85407	7.85691	8.12529	7.97273	8.04522	7.84222	7.92082	8.09096	7.80831	8.04498	7.9052	7.96139
Crabp2_ENSMUST00000005019	3.1505	3.10794	3.21578	2.5976	2.18536	2.64463	2.37506	3.41725	3.18041	1.97097	2.43549	2.54601	2.16094	2.06659	1.98497
Tmem242_ENSMUST00000005053	3.80045	3.84491	3.96914	3.55829	3.43911	3.47862	3.34511	3.74221	3.48059	3.57214	3.42006	3.42969	3.29844	3.20903	3.05147
Thop1_ENSMUST00000005057	7.90278	7.81862	7.76656	7.669	7.74654	8.07186	7.96208	7.67314	7.6997	7.86188	8.07134	7.9666	7.68539	7.72291	7.88777
Pias4_ENSMUST00000005064	6.21221	6.29439	6.21406	6.31936	6.35651	6.24519	6.27931	6.23325	6.35687	6.32075	6.33417	6.41447	6.56887	6.54934	6.44317
Map2k1_ENSMUST00000005066	6.95702	6.93726	7.00834	7.03357	7.03874	6.8659	6.97069	7.02605	7.05287	7.11416	7.05956	7.18008	6.96682	7.05377	7.09073
Sgta_ENSMUST00000005067	6.81994	6.60382	6.90774	6.63303	6.61934	6.83187	6.5262	6.71003	6.69413	6.57315	6.80719	6.6689	6.64083	6.58541	6.58909
Zp3_ENSMUST00000005073	3.0024	2.53892	2.33442	2.28726	2.84949	2.83988	3.1041	2.40198	2.72221	3.32673	3.25594	2.872	2.31705	2.12003	2.88641
Hspb1_ENSMUST00000005077	9.3893	9.21863	9.54542	9.26194	9.33557	9.48538	9.19594	9.49822	9.2368	9.13664	9.45146	9.25211	9.54858	9.33849	9.19938
Kdm5a_ENSMUST00000005108	6.3334	6.83283	6.59297	6.96307	6.90024	6.37057	6.83718	6.47857	6.91812	6.89327	6.56214	6.88712	6.46419	6.80525	6.98752
Cstb_ENSMUST00000005185	5.86083	5.56834	5.83916	5.63776	5.51393	5.56124	5.39225	6.20274	5.77353	5.56203	5.41617	4.98498	5.3848	5.25455	5.21415
Eif2ak4_ENSMUST00000005233	4.84098	5.14226	4.89814	5.13792	5.14883	4.47274	5.00222	5.03227	5.23104	5.22532	4.97365	5.12759	5.01465	5.15565	4.96786
Wdr1_ENSMUST00000005234	7.93633	8.13211	8.03632	8.17641	8.14847	7.86085	8.07284	7.90741	8.08501	8.11934	7.99269	8.12376	7.98367	8.16402	8.10293
Ndrg1_ENSMUST00000005256	4.61313	4.7488	4.09399	3.98325	5.00534	4.42485	4.52063	4.8642	4.75223	4.51878	4.45833	4.66773	4.12968	4.22741	4.51915
Klf5_ENSMUST00000005279	9.1833	9.06127	9.44753	9.26683	9.18795	8.83388	8.6149	9.22812	9.03789	8.71061	8.79191	8.64271	9.09134	8.9021	8.78429
App_ENSMUST00000005406	5.98113	5.86243	5.42338	5.56028	5.4599	5.07138	5.11893	5.57871	5.49841	5.01017	4.76964	4.64893	4.49926	4.54324	5.20834
Letm1_ENSMUST00000005431	6.34113	6.44158	6.21062	6.33107	6.4002	6.36106	6.44144	6.16254	6.23222	6.29656	6.42586	6.37783	6.17886	6.25604	6.51797
Fgfr4_ENSMUST00000005452	2.74715	2.82554	3.21578	3.38936	2.93117	1.5805	2.2076	2.73003	3.01417	2.46337	2.1663	2.01098	2.07605	2.56749	1.81164
Txn2_ENSMUST00000005487	5.91707	5.8719	5.98736	5.75367	5.93283	5.94337	5.95176	5.95853	5.92765	5.82811	6.05332	5.90208	5.88028	5.92551	5.80972
Slc1a3_ENSMUST00000005493	4.95953	4.85449	4.86348	4.71308	4.80323	4.01992	3.80729	4.88631	4.71883	4.43262	4.04077	3.83089	4.30778	4.42082	4.34981
Msh6_ENSMUST00000005503	10.6081	10.7709	10.7127	10.7917	10.8129	10.732	10.8299	10.7478	10.788	10.9077	10.798	10.8894	10.8698	10.9199	10.9018
Mlxipl_ENSMUST00000005507	2.68372	2.77259	3.26972	2.39829	2.9574	2.68585	2.66097	2.77813	2.82623	3.12175	2.09035	2.83921	2.70408	2.40476	2.7
Nid1_ENSMUST00000005532	8.45443	8.42907	8.18847	8.21421	8.85189	8.56849	8.55019	8.56206	8.55746	8.85548	8.68543	8.65924	9.07639	9.03542	9.1303
Hmox1_ENSMUST00000005548	7.01615	6.78183	7.16776	6.90471	6.63161	7.23741	6.85854	6.7193	6.80012	6.9346	7.1061	6.85057	7.21777	7.00133	6.96355
Pafah1b3_ENSMUST00000005583	5.46773	5.56055	5.25976	5.25073	5.3894	5.37215	5.54498	5.60561	5.51017	5.38982	5.51389	5.35916	5.35808	5.27236	5.26548
Rfx1_ENSMUST00000005600	4.5072	4.5028	4.24973	4.40274	4.61831	4.99963	4.85412	4.5821	4.56194	4.76428	4.75741	4.62989	4.69699	4.58184	4.95402
Il27ra_ENSMUST00000005601	1.41744	1.64583	1.71099	1.10283	1.7777	0.928421	1.31452	1.37095	2.17057	2.27815	1.63578	1.60572	1.78654	2.17156	1.30145
Prkaca_ENSMUST00000005606	6.05191	6.1694	6.17925	6.18901	6.23042	6.14158	6.25804	6.01481	6.18409	6.08692	5.96571	6.14614	6.03447	6.16997	6.30008
Asf1b_ENSMUST00000005607	5.26598	5.39526	5.11992	5.08911	4.96712	5.06358	5.05868	4.91885	4.90852	4.98617	5.05582	5.34171	5.01465	5.00044	5.08042
Pkn1_ENSMUST00000005616	5.19383	5.11061	5.01329	5.26545	5.06083	5.32727	5.13652	4.92954	5.17304	5.25575	5.01532	5.18743	4.9204	5.38033	5.23147
Dnajb1_ENSMUST00000005620	6.56444	6.39854	6.64747	6.52299	6.51282	6.45646	6.36141	6.5702	6.45951	6.1903	6.50843	6.5061	6.6482	6.47181	6.15641
Celf1_ENSMUST00000005643	8.18849	8.01661	8.17086	8.02962	8.01122	8.29057	8.05829	8.17326	8.07976	8.0098	8.26514	8.08145	8.21591	8.03867	8.0935
Ndufs3_ENSMUST00000005647	7.13946	6.98168	7.15348	7.14258	7.0014	7.03894	6.99339	7.006	7.04076	6.9839	7.06701	6.91885	7.13363	6.91704	6.97044
Igf1r_ENSMUST00000005671	6.24554	6.64123	6.16153	6.42804	6.51282	5.56124	5.84879	6.32515	6.58715	6.13409	5.61222	6.05269	6.05124	6.22589	6.10411
Trim28_ENSMUST00000005705	11.3425	11.2208	11.2382	11.0754	11.1641	11.6476	11.4185	11.3441	11.0687	11.2683	11.6647	11.4938	11.591	11.4211	11.4433
Chmp2a_ENSMUST00000005711	6.3334	6.18468	6.20717	6.19671	6.17282	6.76612	6.62091	6.4822	6.25803	6.524	6.74043	6.5799	6.56498	6.46666	6.51562
Ube2m_ENSMUST00000005714	6.12536	6.13572	6.22092	6.04854	6.02872	6.38002	6.33371	6.16706	6.08796	6.03523	6.25376	6.15948	6.30078	6.12494	6.20103
Ctr9_ENSMUST00000005749	7.38852	7.82025	7.58302	7.91292	7.86559	7.45571	7.96536	7.45564	7.77068	7.87255	7.4479	7.91147	7.56596	7.9194	7.82738
Snx6_ENSMUST00000005798	7.24622	7.00195	7.36959	7.16631	7.06762	6.86141	6.80637	7.31805	7.13872	6.79655	7.02937	6.89312	7.22764	6.83152	6.60467
Mthfd2_ENSMUST00000005810	5.82086	5.89995	6.13271	6.09599	5.99746	5.86926	5.6508	5.88905	5.87707	5.9005	5.65239	5.68398	5.99455	5.90282	5.71443
Kit_ENSMUST00000005815	8.03969	8.09283	7.81158	7.8104	8.12625	8.12435	8.08572	7.94476	7.99999	8.2673	8.47008	8.52716	8.49467	8.50828	8.21234
Tomm40l_ENSMUST00000005817	2.54784	2.0084	2.17396	2.20819	2.53803	2.68585	2.41405	2.40198	2.35578	2.74654	2.71379	2.73612	2.64636	2.22131	2.91526
Pan2_ENSMUST00000005825	6.15489	6.5905	6.47738	6.77183	6.77493	6.01386	6.48787	6.25466	6.75964	6.50301	5.96571	6.54982	6.05124	6.4485	6.51326
Cs_ENSMUST00000005826	7.56719	7.73113	7.69568	7.71173	7.79553	7.71165	7.77442	7.55906	7.67379	7.91845	7.69388	7.83246	7.81055	7.84696	8.03554
Bcas2_ENSMUST00000005830	7.34946	7.20168	7.3634	7.22272	7.09889	7.78581	7.59833	7.41059	7.27708	7.4541	7.713	7.53901	7.64728	7.51172	7.5291
Ctcf_ENSMUST00000005841	7.96329	7.83404	7.97067	7.94908	7.85691	8.06407	7.93636	7.90199	7.92582	7.8872	8.07504	7.96375	7.86849	7.87443	7.82833
Tfap4_ENSMUST00000005862	5.13577	5.21352	5.02117	4.88181	5.14883	5.51624	5.37753	5.39814	5.13809	5.60993	5.65239	5.42693	5.03728	5.12983	5.58573
Psmb4_ENSMUST00000005923	8.18276	8.26564	8.30929	8.24301	8.25674	8.42142	8.44645	8.17213	8.16655	8.42008	8.31709	8.39873	8.336	8.37175	8.51179
Bloc1s6_ENSMUST00000005954	3.26327	2.90149	3.44405	3.02422	3.63059	2.94549	2.45202	3.11418	2.74893	2.95869	2.43549	2.70005	3.44104	2.90852	2.66644
Adh5_ENSMUST00000005964	8.78424	8.74085	8.84999	8.77761	8.68581	9.04563	8.91677	8.87978	8.74167	8.89749	9.08883	9.02994	9.00212	8.86639	8.89752
Reep5_ENSMUST00000006027	6.11938	5.9485	6.07329	6.01989	5.9095	5.57776	5.37753	5.9946	5.93639	5.54981	5.25158	4.95469	5.45372	5.28411	5.27664
Ergic3_ENSMUST00000006035	6.70084	6.59241	6.4888	6.51685	6.62139	6.48593	6.47641	6.59054	6.51505	6.46662	6.50478	6.42002	6.61474	6.44064	6.3721
Ncoa2_ENSMUST00000006037	5.83187	5.88131	5.76128	5.76752	5.87895	5.39097	5.48673	5.83323	5.88913	5.56203	5.55685	5.45426	5.40234	5.56025	5.57672
Trh_ENSMUST00000006046	8.24382	8.05106	7.8093	7.669	7.86039	9.0357	8.78817	8.24346	7.96623	8.63691	8.61264	8.45121	8.1118	7.93904	8.99197
Smpd4_ENSMUST00000006053	6.88306	7.36707	6.90348	7.28666	7.33354	7.01285	7.29311	6.88494	7.21855	7.23617	7.00631	7.34974	7.04985	7.37002	7.41377
Pex1_ENSMUST00000006061	5.15343	5.16298	5.16331	5.22083	5.19916	4.94124	5.38736	5.00221	5.13809	5.33388	4.62909	5.37641	4.81956	5.06318	5.31504
Ctns_ENSMUST00000006103	4.39286	4.25513	4.35328	4.23337	4.25574	4.71103	4.69699	4.49844	4.31613	4.30265	4.64245	4.69547	4.46628	4.44195	4.19369
Ephb3_ENSMUST00000006112	5.40521	5.81739	5.14178	5.25566	5.35528	5.30097	5.60098	5.54436	5.59361	5.31955	5.28604	5.42693	5.09235	5.21825	5.66006
Tuft1_ENSMUST00000006123	3.19667	3.48234	3.64109	3.45932	3.54669	2.36899	2.52509	3.53389	3.38162	3.14361	3.03064	2.77131	3.14018	2.93858	2.5969
Rcn1_ENSMUST00000006128	6.75777	6.44581	6.46009	6.53721	6.68557	6.6407	6.45085	6.41535	6.34159	6.64962	6.65404	6.58733	6.93101	6.78472	6.53898
Trap1_ENSMUST00000006137	8.58493	8.89898	8.74738	8.92359	8.84093	8.62853	8.94907	8.67513	8.9373	8.87521	8.60584	8.90282	8.69654	8.88049	8.9629
Kptn_ENSMUST00000006178	3.70783	3.89531	3.85026	3.89764	3.6468	3.47862	3.73213	3.4473	3.92911	3.50618	3.79976	3.69089	3.66101	3.72237	3.69168
Napa_ENSMUST00000006181	6.6561	6.52798	6.71949	6.42804	6.49949	6.80172	6.69798	6.51095	6.38695	6.40913	6.58998	6.56744	6.55325	6.45631	6.56653
Snf8_ENSMUST00000006217	4.69583	4.73503	4.55138	4.66207	5.05477	5.18356	4.88914	4.8642	4.87253	4.89246	4.99464	4.97747	4.98002	5.06999	4.85324
Vps54_ENSMUST00000006221	3.83004	4.25513	3.85026	4.28244	4.24514	4.0518	4.72051	3.90267	4.61374	4.59215	4.29875	4.71368	4.1712	4.48332	4.74489
Ctsb_ENSMUST00000006235	7.8523	7.8178	7.85854	7.76018	7.74372	7.54523	7.49187	7.75052	7.65978	7.49719	7.53285	7.4345	7.61003	7.5931	7.54765
Tbcb_ENSMUST00000006254	6.72861	6.56543	6.74828	6.54528	6.67375	6.83187	6.71564	6.64991	6.54394	6.59315	6.81311	6.65719	6.76805	6.6885	6.66538
Inpp5k_ENSMUST00000006286	4.69583	4.80261	4.86348	5.01554	5.04868	4.5191	5.01496	4.64829	5.09709	5.13545	4.45833	4.83506	4.90817	5.04257	4.96096
Crkl_ENSMUST00000006293	6.49685	6.26114	6.59032	6.48575	6.20875	6.43848	6.4296	6.57701	6.34159	6.37257	6.67043	6.41447	6.59199	6.54446	6.39276
Lrwd1_ENSMUST00000006301	7.19027	7.31015	7.12998	7.20882	7.11354	7.122	7.14161	7.06535	7.22689	7.1618	7.06453	7.13013	7.1493	7.17866	7.22644
Cdkal1_ENSMUST00000006353	5.37541	5.56834	5.47595	5.67131	5.34538	5.29433	5.69896	5.27784	5.61918	5.65628	5.60541	5.54855	5.49518	5.60311	5.59913
Htra1_ENSMUST00000006367	4.45116	4.34854	4.42635	4.34846	4.4804	3.95396	4.28852	4.37877	4.23341	4.32195	4.38074	3.89611	4.23133	4.56267	4.28496
Zbtb17_ENSMUST00000006377	4.07217	4.14487	3.91939	4.21326	4.23445	3.93698	3.77769	4.00726	3.98637	4.07132	3.45075	3.76259	3.90202	3.87005	3.84951
Clcnkb_ENSMUST00000006378	1.16218	1.52298	1.25642	1.67315	2.46677	2.36899	1.79994	1.70537	1.59545	2.27815	2.1663	1.25425	1.67551	1.76493	1.98497
Serpinb9b_ENSMUST00000006392	1.41744	2.09721	1.99339	1.78636	1.29227	2.55847	2.59463	2.20494	2.45648	2.68824	2.76354	2.12419	1.78654	1.76493	3.17592
Mob1b_ENSMUST00000006424	4.9325	4.89221	5.02901	4.80998	4.65083	4.71103	4.49357	4.84174	4.85419	4.53541	4.53195	4.53069	4.95647	4.67406	4.42196
Atp6v1b2_ENSMUST00000006435	8.03573	8.12487	8.23667	8.24548	8.05211	8.114	8.2245	8.16311	8.13967	8.16481	8.12586	8.21844	8.17949	8.24142	8.22608
Tep1_ENSMUST00000006444	5.17088	6.01554	5.37498	6.11778	5.97195	5.04786	5.7981	5.39814	6.07746	5.99672	4.85244	6.1019	5.35808	6.21365	5.87727
Ttc5_ENSMUST00000006451	5.44878	5.34174	5.4702	5.22586	5.23177	5.96027	5.69501	5.50203	5.4585	5.81455	6.05332	5.73389	5.72862	5.50106	5.81739
Aamp_ENSMUST00000006462	6.8813	6.76499	6.97016	6.8357	6.90192	7.17725	7.03308	6.85442	6.7398	6.90611	7.07196	7.04642	7.05263	7.14683	7.05552
Tmem147_ENSMUST00000006478	5.43921	5.57995	5.40542	5.40495	5.68851	5.40955	5.63025	5.20933	5.4007	5.62942	5.54268	5.5074	5.55913	5.58896	5.56311
Rps9_ENSMUST00000006496	9.84676	9.70012	10.001	9.72677	9.76881	10.0403	9.78851	10.1318	9.72463	9.84207	10.1378	9.91061	10.1053	9.85744	9.9062
Crip1_ENSMUST00000006523	5.19951	4.95297	4.71585	4.72733	4.82477	4.76011	4.73598	5.11885	4.99476	4.8989	4.86389	4.67704	4.56303	4.07338	4.38117
Gcat_ENSMUST00000006544	2.23036	3.37985	2.73035	3.38936	3.38216	2.91114	3.80729	2.99714	3.36445	3.66576	2.49561	3.61544	2.64636	3.59605	3.78843
Elovl1_ENSMUST00000006557	4.33211	4.36651	4.23624	4.1299	4.41565	4.09835	4.2567	4.12351	4.38588	4.15979	4.06081	4.42417	4.12968	4.13957	4.34981
Tpbg_ENSMUST00000006559	4.3729	4.25513	4.37805	3.95931	4.21284	4.5191	4.41885	4.2986	4.13556	3.82304	4.3485	4.41307	4.27006	3.9161	4.29597
Hyi_ENSMUST00000006562	2.31651	2.40616	2.33442	2.39829	2.50284	1.82151	1.91316	2.33924	2.63895	1.86969	1.52475	1.75382	2.07605	1.76493	1.74891
Cdc20_ENSMUST00000006565	8.94418	9.07535	8.92544	8.99342	8.97376	8.93511	9.05579	8.89894	9.01537	8.8592	8.83981	8.97911	8.84343	8.91728	8.91281
Srm_ENSMUST00000006611	7.22688	7.5104	7.2269	7.41214	7.62088	7.80815	8.02405	7.25784	7.42524	7.95985	7.66308	7.91541	7.40995	7.62696	8.16507
Epha2_ENSMUST00000006614	9.15982	9.31551	9.32112	9.41778	9.21776	8.78314	8.97985	9.04553	9.13097	8.94922	8.76698	8.95827	9.25354	9.36225	8.83708
Arhgef19_ENSMUST00000006618	1.56554	2.22095	1.9278	1.78636	1.83541	0.623566	2.11597	2.57531	1.81363	2.06561	2.49561	1.44066	1.42397	2.22131	1.46651
Rbm14_ENSMUST00000006625	7.66074	7.53246	7.58035	7.58933	7.69972	7.8986	7.72488	7.56763	7.51942	7.61238	7.78553	7.74112	7.52651	7.5931	7.70258
Actn3_ENSMUST00000006626	5.19951	5.13179	4.84583	4.7059	4.68262	5.64724	5.75319	4.76028	5.09188	5.39894	5.70426	5.60815	5.12441	5.31308	5.66006
Zdhhc24_ENSMUST00000006632	1.25238	1.45739	1.78694	1.18772	1.65484	1.66539	2.11597	1.09532	1.91148	1.81625	2.01018	1.88812	2.52351	2.17156	2.52384
Pdk1_ENSMUST00000006669	7.16871	7.20168	7.00834	7.10078	7.17491	6.87929	7.04088	7.03598	7.13619	7.15643	7.04957	7.08714	6.76467	6.95613	6.94268
Mvd_ENSMUST00000006692	5.62795	5.65501	5.78462	5.77783	5.98157	5.20499	5.40198	5.80449	5.94797	5.7195	5.43932	5.60815	5.6719	5.95153	5.77472
Stimate_ENSMUST00000006701	4.46065	4.19603	4.09399	3.92263	4.23445	4.01992	4.04942	4.0273	4.18531	3.94008	4.04077	3.91197	3.92647	3.70499	3.97815
Atp7b_ENSMUST00000006742	3.07835	3.2308	2.87657	3.04712	3.43911	3.10596	3.00541	3.07621	3.43195	3.2482	3.32384	3.26663	2.96239	2.93858	3.10254
Rundc3a_ENSMUST00000006750	1.76258	2.3349	1.99339	2.03572	1.58925	2.02796	2.16251	2.51982	1.7621	1.97097	0.96836	2.27891	1.98585	1.83052	1.81164
Cdt1_ENSMUST00000006760	8.07411	7.86757	8.07281	7.95817	7.89727	8.35429	8.08497	8.02668	7.94328	8.14463	8.36017	8.2008	8.13428	8.04818	8.15679
Snai3_ENSMUST00000006762	2.35774	2.3349	3.18804	3.27761	2.87723	2.83988	2.78515	3.03721	2.39013	2.68824	3.14768	2.54601	2.58624	2.78161	2.52384
Aprt_ENSMUST00000006764	7.04483	6.80179	6.99439	6.88101	6.97917	7.47053	7.23304	7.09413	6.84415	7.2837	7.51298	7.3114	7.29492	7.14199	7.37794
Gtf2h1_ENSMUST00000006774	5.97783	5.98095	6.25475	6.2764	6.19779	6.43546	6.39103	6.14431	6.15192	6.59116	6.43357	6.35482	6.09505	6.40879	6.5688
Nphs1_ENSMUST00000006825	6.54895	6.72896	6.49164	6.67223	6.73947	6.24863	6.49925	6.75578	6.90778	6.69658	5.91707	6.52684	6.17376	6.56387	6.7459
Aplp1_ENSMUST00000006828	6.91793	6.76499	6.61918	6.64058	6.96631	6.78284	6.61255	6.74977	6.68031	6.7581	6.6173	6.47975	6.47252	6.55177	6.82975
Qars_ENSMUST00000006838	8.76999	8.84991	8.60712	8.65812	8.64655	8.83445	8.85478	8.67275	8.75615	8.99315	8.86211	8.93857	8.82241	8.82977	8.94683
Qrich1_ENSMUST00000006851	8.25886	8.25362	8.25684	8.33078	8.29195	8.44712	8.44292	8.19778	8.25599	8.35189	8.32229	8.38033	8.22456	8.40375	8.42792
P4htm_ENSMUST00000006853	2.23036	1.75904	1.9278	2.12453	2.42977	1.74556	2.41405	1.70537	2.6101	2.35511	2.55332	2.54601	2.45792	2.99688	2.03841
Usp19_ENSMUST00000006854	7.95911	7.98786	7.90614	7.88856	7.90572	8.02746	7.99942	7.8952	7.99441	7.94514	7.91913	7.86336	7.95869	7.86663	8.05917
Pola1_ENSMUST00000006856	8.29313	8.48156	8.35523	8.36763	8.35065	8.54558	8.74294	8.45333	8.49767	8.64172	8.62867	8.80592	8.50992	8.56779	8.66193
Acot13_ENSMUST00000006900	5.32952	5.25754	5.65382	5.35994	5.09077	5.38473	5.12481	5.69601	5.49447	5.22018	5.59857	5.29411	5.55129	5.16839	5.14884
Cdk4_ENSMUST00000006911	7.97493	7.99943	8.07186	8.08185	8.15769	8.24906	8.23882	8.02169	8.1026	8.24599	8.22464	8.24841	8.05471	8.07295	8.256
Pip4k2a_ENSMUST00000006912	3.2848	3.17068	3.4204	3.35306	3.36266	2.91114	2.59463	3.35518	3.14061	3.3075	2.94699	3.02562	3.33543	3.20903	3.22284
Mettl1_ENSMUST00000006915	5.62373	5.55664	5.3564	5.54024	5.47814	5.13973	5.39712	5.29447	5.52956	5.24061	5.35257	5.10707	4.90817	5.20595	5.32045
Acat2_ENSMUST00000007005	2.58303	3.32574	3.59957	3.47629	3.69437	3.45497	3.34511	3.35518	3.39859	3.38295	3.38869	3.51521	3.7459	3.53834	3.45673
Sod2_ENSMUST00000007012	7.63792	7.43998	7.6263	7.5019	7.54507	7.95343	7.83494	7.77887	7.55864	7.70442	8.07381	7.86336	7.95275	7.75494	7.88595
Ik_ENSMUST00000007042	7.98812	7.86204	7.93564	7.91525	7.83939	8.14943	7.94886	8.03412	7.78124	7.82092	8.11512	7.91246	7.94977	7.90043	7.83495
Tmco6_ENSMUST00000007046	5.12387	5.15783	5.1985	5.17997	4.95415	4.96656	4.92333	5.34325	5.34049	5.35745	5.19831	4.9159	5.42826	5.25455	5.02192
Ctnnb1_ENSMUST00000007130	10.4766	10.4416	10.3879	10.306	10.3371	10.5126	10.417	10.5077	10.3384	10.3496	10.4832	10.4253	10.4588	10.4095	10.4442
Acly_ENSMUST00000007131	9.61831	9.68922	9.7287	9.71788	9.8056	9.73654	9.78224	9.83838	9.80102	9.90541	9.85871	9.89997	9.87891	9.83889	9.93664
Eif1b_ENSMUST00000007139	3.53891	3.30725	3.83245	3.6509	3.12877	3.45497	2.9267	3.35518	3.44835	3.288	3.14768	3.24176	3.60151	3.30445	3.05147
Chrd_ENSMUST00000007171	1.8227	2.05349	2.11624	2.24826	1.7777	1.82151	2.11597	2.13279	2.35578	2.06561	1.27321	1.82253	1.67551	1.69622	1.74891
Clcn2_ENSMUST00000007207	5.00565	5.42559	4.7542	5.28003	5.19916	4.38785	5.05868	5.08101	5.12285	5.22018	4.31553	5.17434	4.6537	5.07676	5.14275
Psmd2_ENSMUST00000007212	9.11882	9.27564	9.36939	9.36236	9.28339	9.21096	9.30596	9.20467	9.27608	9.27057	9.17753	9.32164	9.2304	9.31254	9.29065
Ap2m1_ENSMUST00000007216	6.86173	7.32057	7.14989	7.42531	7.35343	7.28346	7.68558	6.98822	7.40333	7.80643	7.29135	7.71763	7.1852	7.40139	7.69844
Syngr3_ENSMUST00000007236	2.13873	1.86401	2.47881	2.12453	1.44839	2.09069	2.37506	1.80159	1.95802	1.92122	1.73888	1.25425	1.55521	2.06659	2.18779
Slc44a4_ENSMUST00000007249	3.32693	3.26953	3.10145	2.9773	3.43911	2.72593	2.9267	3.18724	3.27536	3.38295	2.71379	3.02562	2.81301	2.90852	2.82691
Abhd16a_ENSMUST00000007251	3.78542	4.15525	3.243	3.68049	3.79961	3.65504	4.02444	3.56164	3.76864	3.98919	3.62236	3.70915	3.29844	3.70499	3.8791
Neu1_ENSMUST00000007253	3.50261	3.60855	3.62048	3.13526	3.40139	3.07526	3.42364	3.4473	3.43195	3.05411	2.98942	3.31513	3.50739	3.68739	3.29048
Ddah2_ENSMUST00000007255	5.52766	5.39087	5.30567	5.12184	5.38457	5.48155	5.23236	5.51628	5.43812	5.33863	5.67206	5.31215	5.27483	5.15565	5.33119
Clic1_ENSMUST00000007257	6.31782	6.42237	6.53082	6.47735	6.35158	6.09644	6.06941	6.51095	6.59084	6.16648	6.06329	6.05626	6.21405	6.29432	6.0628
Pole_ENSMUST00000007296	8.05778	8.37736	8.09819	8.28395	8.30987	8.05426	8.4035	8.11827	8.31474	8.48466	8.08486	8.39732	8.15642	8.37381	8.44162
Krt19_ENSMUST00000007317	2.77784	3.36204	2.43227	2.90393	3.26102	2.41875	2.81459	3.47675	3.5732	2.59612	2.43549	3.26663	1.78654	1.69622	2.66644
Atp12a_ENSMUST00000007340	3.92909	3.81903	3.53496	3.79315	3.56387	2.97905	3.44262	3.41725	3.49644	4.11623	3.70108	3.4943	2.3892	2.64245	3.8193
Mrpl49_ENSMUST00000007482	5.78353	5.72983	5.83469	5.61877	5.73094	5.96027	5.6094	5.76923	5.55628	5.88112	6.05332	5.84542	5.98875	5.75441	5.71853
Ppp2r1a_ENSMUST00000007708	9.1064	8.93557	9.17064	9.00297	8.94373	9.23068	8.95321	9.1423	8.94562	8.90431	9.22713	9.00568	9.15221	8.89733	8.93102
Tinf2_ENSMUST00000007733	4.75874	4.796	4.70611	5.05562	4.8875	4.64985	4.84701	4.67394	5.14816	4.70671	4.53195	4.71368	4.81956	4.69181	4.72873
Hapln4_ENSMUST00000007738	2.65093	2.44052	2.33442	2.28726	2.73284	2.55847	2.11597	2.27365	2.48854	2.49772	1.92529	1.35046	2.31705	1.29286	2.23433
Dus3l_ENSMUST00000007747	5.98113	5.89376	5.5322	5.85772	5.5745	6.06943	6.10856	5.71467	5.75718	6.06131	5.99203	5.8981	5.65736	5.69842	6.05309
Gtpbp3_ENSMUST00000007754	4.20234	4.216	4.22263	4.21326	4.00219	4.0518	3.93343	4.19612	4.15567	4.01314	3.93618	3.95851	3.87714	3.946	4.07083
Tgfbr1_ENSMUST00000007757	5.15343	5.29557	5.02117	5.15384	5.33542	5.23307	5.42125	5.31907	5.32726	5.45683	5.19831	5.28805	5.45372	5.3471	5.59467
Bcl2l1_ENSMUST00000007803	3.64262	3.63845	4.12359	4.1512	3.81404	4.09835	4.14524	3.74221	3.86949	4.07132	4.13829	3.86387	3.99744	4.20285	3.95054
Khsrp_ENSMUST00000007814	9.17143	9.02954	9.21471	9.01136	8.87358	9.25528	9.02935	9.15544	8.94959	8.97612	9.1608	8.99316	8.8908	8.83177	8.97323
Ccdc124_ENSMUST00000007865	5.444	5.18341	5.31852	5.06687	5.14883	5.52763	5.10708	5.34325	5.03873	5.16781	5.72952	5.0509	5.20658	5.36933	5.06118
Rhoa_ENSMUST00000007959	8.47096	8.40644	8.58269	8.37331	8.48689	8.56643	8.43049	8.65192	8.4125	8.36707	8.49054	8.47742	8.5713	8.41314	8.42854
Hnrnpa0_ENSMUST00000007980	8.51718	8.44713	8.53186	8.35564	8.46819	8.63775	8.39804	8.4644	8.2745	8.32643	8.5315	8.41829	8.53498	8.41448	8.50705
Rbm28_ENSMUST00000007993	7.59547	7.64261	7.68455	7.67545	7.63314	7.55082	7.57702	7.61309	7.50675	7.49613	7.43453	7.38566	7.46106	7.39869	7.49366
Ddx49_ENSMUST00000008004	7.19027	7.08029	7.15707	7.0535	6.85211	7.32482	7.29572	6.80594	6.88838	7.07203	7.34135	7.14362	7.15189	7.00133	7.10489
Id3_ENSMUST00000008016	5.95786	5.65866	5.83021	5.75367	5.71566	5.61024	5.1539	5.90538	5.61555	4.55185	5.41617	5.19393	5.20658	5.15565	4.71238
Crlf1_ENSMUST00000008032	2.54784	2.66048	2.43227	2.85286	2.87723	2.20853	1.67709	2.86976	2.39013	2.93382	1.52475	1.44066	2.16094	1.38306	1.38634
Rplp1_ENSMUST00000008036	4.96621	4.81576	5.33759	4.89449	4.96065	5.20499	4.82548	4.95068	4.75223	4.74296	5.0458	4.95469	4.8834	5.03563	5.00189
Clstn3_ENSMUST00000008297	5.82821	5.84651	5.51556	5.60726	5.91286	5.7284	5.72633	5.5719	5.6967	5.93225	5.30296	5.12759	5.26527	5.47052	5.81356
Cers4_ENSMUST00000008350	5.03136	5.10527	5.12724	4.7344	5.03643	4.55291	4.82548	5.0123	4.95516	4.65438	4.61561	4.59102	5.05956	4.84249	4.81547
Phax_ENSMUST00000008445	6.75585	6.59623	6.7459	6.64434	6.6111	6.79937	6.64774	6.7943	6.68724	6.58518	6.99854	6.76804	6.73036	6.70826	6.6135
Relt_ENSMUST00000008462	2.8079	2.47407	2.33442	2.50138	2.67078	1.96237	2.06788	2.77813	2.58066	2.65818	2.09035	2.66305	2.70408	2.48841	2.1397
Snrpb2_ENSMUST00000008477	7.7621	7.51846	7.8386	7.66716	7.64831	7.95869	7.69946	7.80667	7.57926	7.54725	7.97167	7.69261	7.74332	7.58244	7.5465
Prpf31_ENSMUST00000008517	7.22966	7.08301	7.30001	7.05914	7.18049	7.4661	7.34448	7.25572	7.02582	7.07061	7.4074	7.21245	7.24719	7.23424	7.31301
Sertad1_ENSMUST00000008528	3.84461	3.30725	4.12359	3.93496	3.63059	3.59139	3.26205	3.32312	3.49644	3.87623	3.53911	3.53582	3.97417	4.03215	3.97815
Carhsp1_ENSMUST00000008537	5.41011	5.05071	5.27961	5.20055	5.15451	4.75042	4.53838	5.02232	5.24987	4.52712	4.95236	4.57119	4.73901	4.60076	4.27386
Herpud2_ENSMUST00000008573	4.78919	4.75564	4.62566	4.88181	4.80323	4.66022	4.38981	4.81893	4.71206	4.69935	4.70745	4.27278	4.6827	4.51359	4.3069
Rdh13_ENSMUST00000008579	4.65507	4.51896	4.54045	4.60919	4.4622	4.44899	4.4567	4.45472	4.58437	4.59215	4.38074	4.24802	4.10847	4.49348	4.27386
Mgst1_ENSMUST00000008684	1.93591	1.31653	2.05612	1.26789	1.7777	2.15081	1.96659	1.97667	2.17057	2.46337	2.1663	1.88812	2.16094	1.95338	2.1397
Ubqln4_ENSMUST00000008748	7.5237	7.39032	7.65951	7.52145	7.45358	7.50405	7.30871	7.4538	7.32226	7.30931	7.5002	7.36709	7.49211	7.40677	7.41124
Rps18_ENSMUST00000008812	2.35774	1.81248	1.71099	1.73087	1.94435	2.41875	2.33498	2.57531	1.40701	1.70304	2.71379	2.17763	2.81301	2.22131	2.5969
Zfp955a_ENSMUST00000008830	2.31651	1.96186	2.05612	2.12453	1.83541	1.82151	1.47064	1.37095	1.7621	1.29778	2.23845	1.60572	0.491084	2.06659	1.30145
Gprc5b_ENSMUST00000008878	3.67559	3.60855	3.39635	3.27761	3.36266	3.61292	3.58611	3.4473	3.52764	3.72495	3.75126	3.72718	4.04288	3.78988	3.70826
Coro1b_ENSMUST00000008893	6.74424	6.88053	6.89063	6.91253	6.57132	7.01689	7.01099	6.75578	6.8748	7.0763	6.97761	7.13182	7.01322	7.10933	7.10802
Man1a2_ENSMUST00000008907	4.60459	4.87975	4.69629	4.74844	4.86689	4.11353	4.49357	4.14201	4.64252	4.70671	4.48823	4.44612	4.48286	4.90472	4.65366
Acyp1_ENSMUST00000008966	3.53891	3.60855	3.98535	3.83323	3.85647	3.69597	3.42364	3.66757	3.5732	3.60403	3.67531	3.83089	4.28904	3.87005	2.99852
Sptbn2_ENSMUST00000008991	2.39781	2.68934	2.5239	2.20819	2.39181	2.36899	2.37506	2.68028	2.6101	2.15442	2.43549	2.66305	2.16094	1.83052	2.23433
Rala_ENSMUST00000009003	5.54114	5.65866	5.49871	5.5523	5.58715	5.40955	5.66299	5.45841	5.56758	5.42595	5.42393	5.45966	5.65004	5.61246	5.44935
Vdac3_ENSMUST00000009036	7.8559	7.94588	8.03827	8.04108	8.05591	7.85634	8.00741	7.9786	8.10777	7.99033	7.97959	8.06471	8.02954	8.05162	7.99049
Abcb1b_ENSMUST00000009058	4.99262	4.68576	4.773	4.93188	4.65884	5.47568	5.40682	4.67394	4.81679	4.99822	5.0458	5.11394	4.75275	4.76912	4.91169
Vps72_ENSMUST00000009102	6.15782	5.71937	5.83469	5.6264	5.66482	5.97697	5.78329	6.05928	5.84648	5.71586	5.90049	5.75602	5.70761	5.75863	5.71853
Gabpa_ENSMUST00000009120	8.1494	7.97474	8.13317	8.00425	8.04295	8.15495	7.87567	8.14259	7.96124	7.89044	8.17149	7.95229	8.22209	8.00356	7.88777
Bmp7_ENSMUST00000009143	3.02817	2.87661	3.10145	3.33456	3.15167	1.4903	1.31452	3.18724	3.23813	2.1107	1.92529	1.52555	1.88963	2.60545	1.68332
Dynll1_ENSMUST00000009157	6.3941	6.21971	6.54729	6.25443	6.21147	6.46536	6.26605	6.59054	6.23459	6.29412	6.68664	6.43381	6.52551	6.33726	6.45795
Pdcl_ENSMUST00000009174	6.39905	6.31768	6.52529	6.36564	6.39541	6.63808	6.45319	6.47127	6.46557	6.44698	6.45644	6.43381	6.56498	6.4301	6.22428
Zmat5_ENSMUST00000009220	3.55672	3.59337	3.68144	3.45932	3.54669	3.83072	3.83629	3.61557	3.19991	3.63522	3.67531	4.01832	3.63157	3.72237	3.67491
Ap1b1_ENSMUST00000009234	7.95995	8.00518	7.96965	7.98437	7.97316	7.83474	7.89303	7.87184	7.8955	7.83106	7.75203	7.77835	7.54242	7.60135	7.76831
Derl3_ENSMUST00000009236	2.8079	3.01981	2.28289	1.67315	2.90445	2.83988	2.84345	2.73003	2.96943	2.56406	2.90327	2.37355	2.3892	2.67852	2.9713
Bcl2l13_ENSMUST00000009256	5.82821	5.79434	5.8874	5.77097	5.7978	5.61024	5.48215	5.80449	5.64785	5.44368	5.5709	5.50218	5.59771	5.60311	5.54937
Dgcr8_ENSMUST00000009321	5.77214	5.79101	5.97524	5.89922	5.95252	6.21734	6.26871	5.79867	5.80888	5.86805	6.09764	6.17926	5.89274	5.8245	6.04984
Xpo6_ENSMUST00000009344	6.00727	6.31768	6.02706	6.31465	6.35405	6.10025	6.50152	6.03474	6.30154	6.262	5.96038	6.44748	5.8677	6.1085	6.45795
Zfp212_ENSMUST00000009411	5.03771	5.09452	5.22605	5.1001	4.96712	4.99143	4.84701	5.00221	4.98917	4.66197	4.87525	4.74941	4.96829	4.82651	4.82311
Pttg1ip_ENSMUST00000009435	5.42958	5.53694	5.39332	5.11643	5.32538	5.38473	5.17676	5.49485	5.33609	5.35277	5.37675	5.28196	5.43679	5.34148	5.33119
Elk1_ENSMUST00000009550	2.23036	2.53892	2.33442	2.77269	2.46677	2.26402	2.78515	2.20494	2.5199	2.27815	2.23845	2.96612	2.45792	2.74806	2.08994
Rnmt_ENSMUST00000009679	7.80929	7.80961	7.79213	7.86539	7.7754	7.95026	7.95218	7.76103	7.94977	7.99334	8.09704	8.02972	8.00248	8.02735	8.09507
Srp14_ENSMUST00000009693	6.48062	6.23692	6.49164	6.29086	6.37366	6.24174	6.11745	6.36112	6.23695	6.01462	6.26676	5.94509	6.33315	6.13146	5.98667
Cdk9_ENSMUST00000009699	6.46891	6.65226	6.51136	6.47101	6.66781	6.60085	6.71759	6.65635	6.70611	6.65343	6.53374	6.65483	6.42182	6.49475	6.6113
Eng_ENSMUST00000009705	5.04404	5.26235	5.09025	4.99802	4.8875	5.5941	5.55374	4.84174	5.05488	5.24567	5.16167	5.15449	5.30312	5.36381	5.11814
Tor2a_ENSMUST00000009707	4.41256	4.58187	4.12359	4.42038	4.48942	4.40029	4.31966	4.2986	4.15567	4.25323	4.15702	4.30916	4.5315	4.2753	4.34981
Syngr1_ENSMUST00000009727	5.08757	4.72809	4.86348	4.7344	4.89431	5.2261	4.85412	4.76028	4.67074	4.85982	4.9088	4.79287	4.7932	4.65608	5.08678
Taf7l_ENSMUST00000009740	4.41256	4.58954	5.19153	4.8561	4.09963	3.07526	2.95342	3.90267	3.88161	2.88274	2.98942	3.02562	3.26047	3.13308	2.82691
Tex15_ENSMUST00000009772	2.74715	3.91987	3.243	4.18256	3.78504	1.96237	3.08005	2.91348	4.03059	3.38295	1.63578	2.54601	2.24111	3.28118	3.05147
Ppp2cb_ENSMUST00000009774	6.64574	6.55567	6.57434	6.56326	6.47246	6.60085	6.56786	6.53564	6.49546	6.33981	6.45644	6.59961	6.47667	6.3953	6.45795
P4ha1_ENSMUST00000009789	6.9587	6.96703	6.73396	6.72111	7.40199	6.54313	6.53728	7.21917	7.1908	6.71312	6.70586	6.62147	6.75787	6.69951	6.71751
Tex11_ENSMUST00000009814	6.4642	6.98168	6.52529	6.99287	6.78778	5.68331	6.24998	6.16254	6.54775	6.01759	5.68503	6.09844	5.75617	6.14763	5.95576
Kcnd1_ENSMUST00000009875	2.51177	2.44052	2.38418	2.43348	2.57238	2.64463	2.72439	2.62875	2.63895	2.68824	2.23845	2.77131	1.42397	2.31595	2.48587
Sdhb_ENSMUST00000010007	7.5237	7.41104	7.42709	7.32932	7.2458	7.70038	7.48845	7.57105	7.40963	7.52556	7.77799	7.62208	7.69432	7.56688	7.58292
Snap47_ENSMUST00000010038	6.91103	6.9875	6.91199	7.02639	6.83099	6.78522	6.92923	6.77369	6.98707	6.77044	6.80125	6.95946	7.03024	6.91326	6.75391
Kdsr_ENSMUST00000010049	6.30996	6.26833	6.09212	5.97283	6.20875	6.09261	6.25804	6.18055	6.20836	6.17976	6.19151	6.17599	6.27721	6.07507	6.28358
Tmem115_ENSMUST00000010189	4.75102	4.76244	4.13816	4.67683	4.79598	4.38785	4.57325	4.76028	4.72558	4.8989	4.17552	4.64893	4.38038	4.53342	4.87544
Ifrd2_ENSMUST00000010192	3.88747	4.10259	3.88524	3.95931	4.11135	4.06748	4.14524	3.94542	4.06289	4.35042	4.06081	3.86387	3.3715	3.51858	4.31775
Hyal1_ENSMUST00000010195	2.04088	1.75904	1.54593	1.8398	1.7777	1.89366	2.06788	2.05684	2.28452	2.15442	1.92529	2.327	2.07605	2.06659	2.27942
Tusc2_ENSMUST00000010198	1.69984	2.05349	1.14539	1.55029	1.37244	2.15081	1.31452	1.89178	1.70866	1.76075	2.09035	1.15115	1.67551	2.06659	1.68332
Nprl2_ENSMUST00000010201	4.24691	4.43627	4.03292	4.44646	4.39661	4.40029	4.51166	4.10478	4.40281	4.51878	4.62909	4.44612	4.77985	4.71804	4.34981
Slc3a2_ENSMUST00000010239	8.86642	8.74258	8.71858	8.63846	8.8012	9.12036	8.96721	8.80992	8.73417	9.02919	8.98057	8.84979	8.91773	8.78446	8.98816
Nxf1_ENSMUST00000010241	7.57704	7.49004	7.5246	7.50501	7.45588	7.81513	7.73358	7.50828	7.4335	7.54725	7.7256	7.68801	7.5305	7.50797	7.62937
Slc47a1_ENSMUST00000010267	5.08143	4.9707	4.65635	4.80327	5.26365	4.68076	4.68906	4.71158	5.06555	4.83987	4.41228	4.67704	4.6537	4.76073	4.84577
Spire2_ENSMUST00000010298	3.17377	3.15007	3.15975	3.23835	3.69437	3.16546	3.08005	2.99714	3.23813	3.2482	3.03064	3.13773	3.1814	3.28118	3.24574
Fdx2_ENSMUST00000010348	1.8227	1.81248	2.11624	1.55029	1.94435	1.82151	2.2076	2.13279	1.86339	1.86969	1.63578	1.35046	2.16094	2.2694	2.1397
2610507B11Rik_ENSMUST00000010421	6.26463	7.04025	6.19328	6.8357	6.9468	6.23133	6.92079	6.36112	6.89138	6.82219	6.16399	6.89312	6.24354	6.58778	6.79136
AI597479_ENSMUST00000010434	4.09673	3.97949	4.09399	3.94718	3.97677	4.06748	3.87872	4.14201	4.24284	3.65057	4.29875	4.14446	4.19152	4.16521	3.70826
Ifi35_ENSMUST00000010502	1.93591	1.45739	0.588997	1.4847	1.29227	1.96237	2.45202	2.20494	1.33829	1.97097	2.01018	2.12419	1.98585	1.62407	1.68332
Rdm1_ENSMUST00000010506	5.98442	5.83041	5.5541	5.722	5.70408	5.53892	5.4913	5.88905	5.84648	5.417	5.52836	5.55361	5.27483	5.41815	5.04169
Nedd8_ENSMUST00000010520	5.6195	5.61796	5.77998	5.59177	5.64075	5.78166	5.63025	5.80449	5.62279	5.56203	5.88933	5.60815	5.91124	5.69842	5.62119
Gosr1_ENSMUST00000010536	4.99915	4.76244	4.84583	4.86901	4.7887	4.80757	4.59038	4.8753	4.79131	4.6158	4.57438	4.69547	4.8834	4.76073	4.62774
Mrpl52_ENSMUST00000010550	5.96788	5.89066	5.92149	5.76061	5.87895	6.18895	5.89087	6.0544	5.80888	5.91646	5.97629	5.99804	6.02883	6.07168	6.02358
Dazl_ENSMUST00000010736	6.27003	6.05765	6.7904	6.50656	6.01005	5.15449	5.10708	5.89451	5.63717	4.95561	4.9088	5.0509	5.7832	5.66734	5.04822
Plcd1_ENSMUST00000010804	5.70983	6.01554	5.65888	5.88021	5.98476	4.74067	4.8822	5.62547	5.63	5.39439	4.82926	5.02926	5.47874	5.80015	5.0994
Fads1_ENSMUST00000010807	6.70484	6.86322	6.6677	6.77183	6.88152	6.22435	6.35891	6.64343	6.76946	6.60304	6.09279	6.35482	6.66646	6.4248	6.53434
Cars_ENSMUST00000010899	8.49541	8.50964	8.51381	8.48759	8.36664	8.63578	8.71344	8.37144	8.38881	8.53722	8.54312	8.54188	8.49569	8.49507	8.55483
Phlda2_ENSMUST00000010904	7.02257	6.81658	6.882	6.72998	7.11936	7.16819	7.03308	7.16367	7.0176	7.05627	7.1881	6.98779	6.85343	6.95061	7.09547
Kdelr3_ENSMUST00000010974	5.90669	5.92746	5.95481	5.93649	5.88238	4.73086	4.79626	5.76923	5.71714	4.76428	4.75741	4.56117	5.51949	5.38033	4.56539
Dnajc19_ENSMUST00000011029	4.99262	4.73503	4.80074	4.57808	4.71373	5.25378	5.14234	4.67394	4.90258	5.15711	5.24284	4.88411	5.1138	5.18729	5.0086
Apip_ENSMUST00000011055	5.14168	5.08369	5.20544	5.32288	5.03643	5.30097	5.16537	5.13741	4.89064	5.19946	5.2775	5.27585	5.30312	5.37484	5.07404
Pdhx_ENSMUST00000011058	6.47595	6.55567	6.37959	6.36336	6.30382	6.54873	6.50378	6.26735	6.39543	6.36562	6.49745	6.38069	6.62971	6.46666	6.47259
Brf1_ENSMUST00000011302	3.60887	3.81903	3.10145	3.54226	3.92454	3.47862	3.96002	3.58886	3.6881	3.80943	3.35663	3.63467	3.71815	4.11345	3.99176
Thg1l_ENSMUST00000011398	4.92566	4.88599	4.88091	4.97432	4.90108	4.43697	4.80362	4.79576	4.99476	4.7853	4.82926	5.08626	4.5315	4.70061	4.76881
Adam19_ENSMUST00000011400	5.53217	5.91529	5.37498	5.60726	5.94926	5.57228	6.13506	5.84457	6.12157	6.53438	5.72325	5.90208	5.72862	5.69402	6.38247
Sugp1_ENSMUST00000011450	6.86173	6.58667	6.67771	6.52503	6.48379	6.91223	6.70585	6.54262	6.54584	6.65533	6.74043	6.47442	6.52551	6.28557	6.48226
Acad9_ENSMUST00000011492	6.71677	6.8648	6.56628	6.71397	6.81494	6.46832	6.57863	6.58717	6.71968	6.47311	6.39463	6.46101	6.30545	6.38169	6.54592
Dhdh_ENSMUST00000011526	2.54784	2.63104	2.87657	2.43348	2.50284	2.09069	2.52509	2.77813	2.74893	2.93382	2.55332	2.27891	2.75957	2.84646	2.82691
Fsd1_ENSMUST00000011733	5.05034	4.9589	4.97321	4.74844	4.37731	5.00778	4.74366	4.7722	4.75223	4.83316	5.0458	4.93154	5.13494	4.73527	4.64507
Sptbn4_ENSMUST00000011895	3.53891	3.88287	3.64109	3.60533	3.70988	3.71601	3.96002	3.90267	3.86949	4.44147	3.95771	3.94316	3.85183	4.01815	3.8193
Pgam1_ENSMUST00000011896	9.80336	9.78799	9.89264	9.73318	9.93334	9.95356	9.85733	10.0637	9.8066	9.76924	10.0016	9.96505	9.93007	9.84609	9.88538
Snapc2_ENSMUST00000011981	4.78164	4.5028	4.81895	4.68415	4.64277	4.94973	4.68906	4.55475	4.53149	4.47634	4.86389	4.56117	4.60908	4.44195	4.45181
Gltp_ENSMUST00000012028	4.05974	3.73848	3.70121	3.40717	3.72523	4.41262	3.93343	3.64181	3.71545	3.76781	4.33211	3.83089	3.90202	4.05977	4.24005
Med15_ENSMUST00000012259	6.00727	5.91224	6.12907	5.93955	5.87551	6.17091	5.92502	5.97925	6.03195	5.95406	6.07811	5.89412	6.25806	6.00932	6.01361
Gstm2_ENSMUST00000012348	2.23036	1.75904	1.78694	1.67315	2.22908	3.25035	2.95342	2.86976	2.92326	3.14361	3.35663	3.08277	2.64636	2.48841	3.29048
Nanog_ENSMUST00000012540	9.42428	9.22419	9.61479	9.38079	9.29501	9.54785	9.33133	9.49822	9.27378	9.25622	9.58112	9.36583	9.59794	9.42828	9.38585
Hps3_ENSMUST00000012580	4.39286	4.58187	4.41442	4.48889	4.25574	4.40029	4.88914	4.42482	4.89064	4.95561	4.38074	4.78428	4.23133	4.45241	4.66219
Kif11_ENSMUST00000012587	8.96684	8.93067	8.95815	8.95003	8.96328	9.09524	9.1054	9.05166	9.03144	8.96119	9.05863	9.06714	9.16576	9.01484	8.9924
Rpa3_ENSMUST00000012627	6.21782	5.99835	6.16865	5.89291	5.97517	6.23133	6.08157	6.18946	5.97085	6.01759	6.42586	6.12589	6.54932	6.18572	5.86992
Tnpo3_ENSMUST00000012679	7.63373	8.023	7.83748	8.15548	8.12335	7.76792	8.17994	7.78917	8.03569	8.03194	7.75203	8.139	7.75361	8.01065	8.11775
Strn3_ENSMUST00000013130	6.15197	6.33832	6.32967	6.50656	6.43795	6.09261	6.26605	6.158	6.48158	6.30871	6.11212	6.16941	6.24354	6.4846	6.46285
Amotl1_ENSMUST00000013220	4.08451	4.19603	4.47308	4.59372	4.40616	4.21558	4.39955	4.45472	4.36012	4.53541	4.31553	4.42417	4.08694	4.56267	3.99176
Zkscan17_ENSMUST00000013262	5.37038	5.38206	5.18453	5.33224	5.58295	5.06358	5.2159	5.19169	5.39225	5.19946	5.14299	5.1411	5.0032	5.23651	5.35245
Gfod2_ENSMUST00000013294	1.93591	2.09721	1.71099	2.03572	2.14027	1.39408	1.54279	1.23971	2.45648	1.97097	0.340329	1.60572	1.67551	1.95338	1.68332
Enkd1_ENSMUST00000013299	3.78542	3.68218	3.59957	3.44214	3.40139	3.38159	3.08005	3.53389	3.58807	3.38295	3.32384	3.4943	3.1814	3.13308	2.9713
Atp6v0d1_ENSMUST00000013304	7.05583	7.17769	7.2132	7.12386	7.08111	7.36662	7.46659	7.23433	7.13239	7.13067	7.25702	7.14362	6.96387	6.88073	7.23505
Arih2_ENSMUST00000013338	5.88923	5.90611	6.01526	6.14723	6.2142	5.97697	5.9715	5.9533	6.05086	5.90691	6.06329	6.10535	6.05124	6.27088	5.72669
Igf2bp1_ENSMUST00000013559	9.82649	9.66696	9.81739	9.70758	9.69083	9.92856	9.76278	9.81516	9.64508	9.62275	9.9069	9.71721	9.70076	9.55131	9.66896
Fgfrl1_ENSMUST00000013633	2.94946	2.97364	2.65128	2.71665	3.15167	2.87595	3.1041	2.73003	2.66724	2.88274	2.71379	3.13773	3.00893	3.13308	2.79621
Commd8_ENSMUST00000013693	5.2108	4.96481	5.01329	5.05562	4.7517	5.18356	5.02129	5.0123	4.99476	5.09114	5.22519	5.1411	5.42826	4.84249	4.91883
Ndufs2_ENSMUST00000013737	7.9741	8.07449	7.88145	7.98065	8.03758	8.07089	8.22381	7.88973	8.0083	8.31925	8.16572	8.30728	8.13952	8.30265	8.3918
Fnbp4_ENSMUST00000013759	7.13503	7.12586	7.32888	7.15186	7.2378	7.1609	7.13287	7.22134	7.18103	7.09044	7.26784	7.00637	7.3434	7.22969	7.10646
Atraid_ENSMUST00000013766	4.88395	4.62731	4.41442	4.46358	4.39661	4.93271	4.68109	4.46944	4.48457	4.83316	4.8409	4.79287	4.7932	4.70061	4.91883
Trim54_ENSMUST00000013771	1.8227	1.31653	2.28289	1.89133	1.52054	1.4903	1.6115	1.89178	1.91148	2.23807	1.40446	1.15115	1.78654	1.76493	1.81164
Cad_ENSMUST00000013773	9.9018	10.1786	10.0345	10.2105	10.1305	9.84515	10.0871	10.0435	10.2324	10.1579	9.81772	10.1389	9.805	9.98061	10.1676
Pten_ENSMUST00000013807	5.14757	5.48027	5.02901	5.37811	5.35528	5.35309	5.40198	4.92954	5.26383	5.30022	5.17092	5.37641	5.32167	5.45501	5.34717
Pea15a_ENSMUST00000013842	2.09063	1.64583	2.05612	1.78636	1.65484	2.46684	1.73982	1.89178	1.7621	2.27815	1.63578	1.95086	1.98585	1.69622	1.87176
Ppp1r12c_ENSMUST00000013886	4.33211	4.35755	4.51834	4.41159	4.4804	4.36265	4.20204	4.17831	4.55439	4.2929	4.28178	4.19717	4.43253	4.12657	4.09626
Ly6g6e_ENSMUST00000013910	2.09063	2.63104	2.43227	2.36222	2.35281	2.68585	2.37506	2.05684	2.5506	3.14361	2.60882	2.77131	2.31705	2.31595	2.7
Ehmt2_ENSMUST00000013931	6.96538	6.89454	6.78115	6.91875	6.94844	6.74677	6.69995	6.7855	6.76456	6.87378	6.78327	6.73054	6.79818	6.74487	6.91616
Elof1_ENSMUST00000013966	3.9427	3.88287	3.93616	3.91019	3.92454	4.21558	4.38981	3.7899	3.91738	4.15979	4.33211	4.15782	4.19152	3.77329	3.92239
Pip4k2c_ENSMUST00000013970	5.44878	5.50077	5.59693	5.58787	5.37973	5.26062	5.39225	5.36703	5.60828	5.37142	5.2775	5.38211	5.13494	5.35269	5.38891
Clip3_ENSMUST00000014065	5.46302	5.41267	5.22605	5.12184	4.7517	5.1691	5.0086	5.18278	5.13303	4.91805	5.12407	4.81833	4.94454	4.77746	4.69584
Tctex1d2_ENSMUST00000014220	4.04719	3.66775	4.30243	3.70949	3.67869	3.67565	3.44262	4.17831	3.92911	3.69566	3.75126	3.61544	3.82607	3.83851	3.55167
Chp1_ENSMUST00000014221	5.45829	5.36428	5.64874	5.59177	5.55745	5.03196	4.78886	5.48764	5.32726	4.93695	5.15236	4.80989	5.10312	5.02866	4.81547
Tvp23b_ENSMUST00000014321	4.44161	4.5109	4.55138	4.33921	4.19089	4.29765	4.35014	4.33121	4.4766	4.2929	4.42779	4.28501	4.46628	4.69181	4.28496
Dnajc7_ENSMUST00000014339	8.71702	8.46288	8.53255	8.40689	8.37153	9.02218	8.81026	8.57574	8.41146	8.63353	8.89736	8.74472	8.66146	8.49633	8.70388
Cacybp_ENSMUST00000014370	8.58547	8.5157	8.63114	8.50526	8.58689	9.03171	8.79649	8.86872	8.60987	8.71015	9.01372	8.84877	9.08048	8.86394	8.84319
Pigl_ENSMUST00000014389	4.89799	4.58187	4.9236	4.90706	4.7517	4.81687	4.67308	4.85301	4.59913	4.58418	4.99464	4.77565	4.69699	4.68296	4.31775
Ankrd17_ENSMUST00000014421	8.57895	8.69401	8.72101	8.82642	8.84313	8.56435	8.64287	8.61847	8.76231	8.65176	8.48684	8.57088	8.50282	8.56237	8.62255
Ndufa2_ENSMUST00000014438	6.39658	6.13572	6.32967	6.16042	6.08334	6.5709	6.31838	6.31296	6.08796	6.1903	6.47148	6.34609	6.66646	6.49728	6.18927
Glis2_ENSMUST00000014447	4.46065	4.45319	5.03681	4.93188	4.44376	4.29765	4.14524	4.28202	4.48457	4.18108	4.62909	4.34463	4.6827	4.65608	4.3069
Cox6c_ENSMUST00000014457	7.73986	7.49618	7.71525	7.36165	7.50005	7.85521	7.55864	7.84669	7.50968	7.46933	7.89701	7.583	7.65827	7.45826	7.52208
Anapc1_ENSMUST00000014499	7.44699	8.07927	7.64428	8.14756	8.22537	7.43168	8.18206	7.69992	8.199	8.20954	7.44409	8.13225	7.52651	8.14642	8.16357
Mertk_ENSMUST00000014505	3.53891	3.60855	2.97727	3.09186	3.47587	2.87595	3.17392	3.4473	3.25687	2.88274	2.60882	2.96612	3.00893	2.84646	3.02524
Tsg101_ENSMUST00000014546	6.96538	6.81658	6.80874	6.68141	6.80052	6.97386	6.74652	6.71003	6.81442	6.68172	7.094	6.72382	7.03024	6.88652	6.63318
Hps5_ENSMUST00000014562	3.02817	3.34401	3.21578	3.50965	3.38216	3.0439	3.74748	3.18724	3.34706	3.68078	3.53911	3.83089	3.57081	3.49854	3.43696
Rnf166_ENSMUST00000014614	1.98935	2.09721	1.85909	1.94108	1.71758	2.41875	1.6115	1.89178	2.08927	1.51459	2.81163	2.327	1.67551	2.01109	1.38634
Ankrd28_ENSMUST00000014640	7.23935	7.30317	7.18891	7.23648	7.13093	7.35389	7.40984	7.23433	7.25512	7.2837	7.37375	7.40679	7.47148	7.45955	7.33987
Ankrd52_ENSMUST00000014642	3.62584	4.08097	4.19502	4.09736	4.06385	3.75527	3.91994	3.94542	4.09448	4.11623	3.89212	4.14446	3.87714	4.25156	4.28496
U2af1_ENSMUST00000014684	8.34786	8.3757	8.36378	8.3395	8.34879	8.60186	8.51979	8.50247	8.38402	8.45328	8.5783	8.64449	8.51899	8.49633	8.46559
Wdfy2_ENSMUST00000014691	2.92223	3.10794	2.56762	2.39829	2.87723	3.01184	3.60309	2.05684	2.5506	3.05411	3.18468	3.13773	2.52351	2.99688	3.07723
Rbsn_ENSMUST00000014694	4.77404	4.61984	4.76363	4.69144	4.7887	4.84444	4.79626	4.67394	4.70526	4.75011	4.86389	4.69547	4.51547	4.76073	4.90451
Dguok_ENSMUST00000014698	4.15636	4.03675	4.15259	4.05279	3.8977	4.01992	3.74748	4.0273	4.09448	4.02497	3.86958	3.81412	3.66101	3.25753	3.49546
Slc25a11_ENSMUST00000014750	5.86441	6.08776	5.8076	6.06827	6.06837	5.80523	5.94512	5.61226	5.86796	5.7012	5.5709	5.74278	5.47044	5.67182	5.71853
Chfr_ENSMUST00000014812	4.72762	4.63475	4.20889	4.49723	4.51613	4.15816	4.03698	4.62218	4.41953	3.57214	3.79976	3.57618	3.26047	2.87783	4.29597
Tex261_ENSMUST00000014892	5.10583	4.9707	4.64619	4.77612	4.61007	4.76972	4.39955	4.8642	4.83561	4.60796	4.86389	4.57119	4.57855	4.76912	4.76088
Psmb1_ENSMUST00000014913	8.58493	8.60122	8.78723	8.62901	8.59266	8.66055	8.64748	8.74031	8.5883	8.56583	8.71102	8.62899	8.73944	8.61392	8.59607
Dll1_ENSMUST00000014917	2.18527	2.25994	1.35952	1.8398	2.09373	2.91114	2.84345	2.33924	2.5506	2.68824	2.71379	2.62509	3.14018	2.99688	3.35508
Fhod1_ENSMUST00000014922	4.64678	4.66412	4.31532	4.76925	4.58505	4.2572	4.64876	4.52687	4.63538	4.51878	4.50295	4.42417	4.1712	4.43142	4.41187
4931428F04Rik_ENSMUST00000014981	2.09063	2.09721	1.85909	2.03572	2.18536	1.96237	1.79994	2.40198	2.48854	2.06561	1.83509	2.66305	1.98585	1.46795	2.27942
Tppp3_ENSMUST00000014990	4.20234	3.96776	4.28944	3.89764	4.0878	3.52479	3.26205	3.71775	3.64608	2.93382	2.85818	2.73612	2.3892	3.10685	3.05147
E2f4_ENSMUST00000015003	6.60566	6.58283	6.55546	6.59469	6.56919	6.71726	6.5978	6.54609	6.42472	6.41812	6.54801	6.52168	6.4132	6.32877	6.54592
Surf4_ENSMUST00000015011	7.09597	7.11394	6.90348	6.75801	7.10624	6.97177	6.81368	7.01857	6.82545	6.75455	6.91294	6.99711	6.97563	7.03476	7.00105
Surf2_ENSMUST00000015017	4.69583	4.61232	4.55138	4.60147	4.47133	4.84444	4.67308	4.46944	4.39437	4.59215	4.86389	4.76695	4.84543	4.60076	4.55626
Dnajb9_ENSMUST00000015049	4.99915	4.8984	4.80987	4.68415	4.90108	5.1691	5.10111	4.73613	4.76538	4.91805	5.21629	5.00729	5.43679	5.21211	4.98837
Ppp1cb_ENSMUST00000015100	8.48382	8.5167	8.57935	8.50733	8.48914	8.60186	8.58478	8.66877	8.55321	8.4423	8.56521	8.54887	8.521	8.51889	8.53579
Tsen15_ENSMUST00000015124	4.86977	4.796	4.81895	4.79653	4.60178	4.89805	4.67308	4.59558	4.73897	4.56811	4.57438	4.58114	4.5315	4.54324	4.59244
Limk1_ENSMUST00000015137	3.52087	3.51494	3.68144	4.06406	3.75544	3.30429	3.30418	3.66757	3.79452	3.22788	2.90327	3.40749	3.4746	3.51858	3.47622
Efr3a_ENSMUST00000015146	5.55893	5.98968	5.70366	6.15516	6.1644	5.57228	6.20065	5.73309	6.29022	6.3841	5.55685	6.24958	5.65736	6.1282	6.41314
Trappc2l_ENSMUST00000015157	4.23589	4.02548	4.18101	3.6509	3.75544	3.84899	4.24593	4.00726	4.04144	4.22275	4.02045	4.08975	4.04288	4.004	4.13357
Acsf3_ENSMUST00000015160	4.27945	4.60477	4.18101	4.38487	4.44376	3.91981	4.2567	4.52687	4.58437	3.97707	3.64908	4.04732	3.77312	4.11345	4.12124
Galns_ENSMUST00000015171	3.46538	3.30725	3.32171	3.04712	3.2398	2.76492	2.62818	3.38655	3.34706	3.45465	2.66226	3.16445	3.14018	2.8144	2.85697
Edf1_ENSMUST00000015236	6.82178	6.62078	6.73156	6.68689	6.63365	6.84785	6.58291	6.79137	6.67161	6.66292	6.86246	6.59961	6.73383	6.52973	6.51797
Fbxw5_ENSMUST00000015239	3.19667	3.49873	3.70121	3.81999	3.4939	3.30429	3.38491	3.32312	3.38162	3.61971	3.32384	3.74499	3.60151	3.65155	3.93653
Casd1_ENSMUST00000015333	3.46538	3.01981	2.91093	3.44214	3.3429	3.2226	3.12775	3.41725	2.94653	3.16514	3.14768	3.08277	3.33543	3.39395	3.31234
Cnksr3_ENSMUST00000015346	4.34241	4.32114	3.93616	3.94718	4.01474	4.22959	3.94679	3.94542	4.37735	3.71038	3.79976	3.91197	3.95052	3.93112	3.80395
Nipsnap3b_ENSMUST00000015391	5.12983	5.07278	5.3564	5.25073	5.05477	5.34668	5.52286	5.4731	5.27766	5.49134	5.62573	5.61785	5.874	5.63558	5.39916
Lage3_ENSMUST00000015433	4.51633	4.2357	4.37805	4.29206	4.29741	4.80757	4.39955	4.23109	4.31613	4.60796	4.87525	4.60084	4.48286	4.54324	4.3069
Gdi1_ENSMUST00000015435	6.53329	6.7062	6.80189	6.85042	6.74325	6.41722	6.53286	6.83749	6.95874	6.64004	6.46774	6.59225	6.75104	6.84943	6.74188
Sash1_ENSMUST00000015449	5.37541	5.52498	5.16331	5.00388	5.45531	6.0577	5.91486	5.74524	5.61192	6.28185	6.10248	6.04552	5.94155	5.87588	6.23576
Gadd45b_ENSMUST00000015456	4.23589	4.09182	3.57835	3.72378	4.0878	3.97073	3.51615	4.28202	4.19506	4.03669	3.77572	3.72718	4.41536	4.03215	4.20542
Slc39a1_ENSMUST00000015467	5.55006	5.26714	5.03681	5.16958	5.14313	5.30759	5.27004	5.35914	5.22629	5.50407	5.35257	5.44883	5.31242	5.36933	5.55397
Endog_ENSMUST00000015481	4.86977	4.77596	4.79155	4.74844	4.71373	4.73086	4.52953	4.43985	4.56946	4.58418	4.2646	4.63944	4.04288	4.21518	4.39148
Xk_ENSMUST00000015486	1.49339	1.86401	1.9278	2.28726	2.35281	2.02796	2.11597	2.51982	1.81363	1.64292	0.340329	2.22916	1.98585	1.89326	2.79621
Pcolce2_ENSMUST00000015498	4.61313	4.77596	4.19502	4.29206	4.75918	4.99963	5.0401	4.59558	4.76538	5.26076	5.19831	5.03651	4.46628	4.70061	5.29323
Clpx_ENSMUST00000015501	6.52427	6.4288	6.42486	6.48575	6.48153	6.52337	6.51503	6.37682	6.46153	6.33269	6.45265	6.39486	6.55325	6.52973	6.54592
Mov10l1_ENSMUST00000015509	5.8751	6.54386	5.74709	6.22711	6.02563	4.27081	4.94346	5.51628	5.76374	5.09676	4.44314	5.03651	4.98002	5.60311	4.94005
Atf6b_ENSMUST00000015605	6.06752	6.00983	5.77533	5.76752	5.97517	6.20676	6.1668	5.79283	5.77353	6.10095	6.07319	6.18254	6.25806	6.26792	6.28634
Notch4_ENSMUST00000015612	4.62162	4.6929	4.46154	4.63209	5.37488	4.48447	4.29898	4.54088	4.71883	4.72857	3.84668	3.86387	4.69699	4.55299	4.8078
Rnf5_ENSMUST00000015622	3.6918	3.41483	3.13089	3.84634	3.45761	3.75527	3.66905	3.58886	3.83249	4.04833	3.89212	3.76259	4.04288	3.82248	3.65793
Lpl_ENSMUST00000015712	5.37541	5.31884	5.38112	5.30874	4.94106	4.98319	5.2159	5.21808	5.42576	5.03961	4.3966	4.80989	4.08694	4.35547	4.63643
Atp6v0e_ENSMUST00000015719	5.92052	5.6623	5.70366	5.40051	5.42743	5.92197	5.67909	5.70226	5.62279	5.43927	5.90604	5.62749	5.65004	5.38579	5.62992
Bnip1_ENSMUST00000015725	4.87687	4.62731	4.99739	4.71308	4.49838	4.89805	4.59886	4.78403	4.70526	4.39667	4.91982	4.69547	4.75275	4.29867	4.43198
Srf_ENSMUST00000015749	4.21361	4.61984	4.28944	4.66946	4.45301	4.32401	4.28852	4.28202	4.79773	4.56811	4.53195	4.80141	4.43253	4.70935	4.72058
Lama5_ENSMUST00000015791	9.49527	9.736	9.22498	9.43443	9.82399	9.48319	9.73514	9.52621	9.72168	10.0002	9.35891	9.61982	9.12738	9.33779	9.92183
Steap1_ENSMUST00000015796	5.47712	5.27192	5.62307	5.7077	5.85822	5.42789	5.22689	5.45841	5.39225	5.34336	5.49928	5.10707	5.85502	5.69842	5.33119
Hspa8_ENSMUST00000015800	12.1437	12.0818	12.4047	12.1605	12.1334	12.608	12.363	12.4767	12.0814	12.2841	12.7191	12.5125	12.6745	12.4027	12.4007
Pdzd11_ENSMUST00000015812	4.67151	4.34854	4.67646	4.71308	4.39661	4.2572	4.4567	4.62218	4.60645	4.13818	4.45833	4.36781	4.60908	4.51359	4.2286
Acadsb_ENSMUST00000015829	4.81901	4.98823	5.14178	5.36905	5.28452	5.23307	5.49585	5.19169	5.34049	5.36212	5.2775	5.59839	5.55913	5.82851	5.56311
Prune1_ENSMUST00000015855	6.09521	5.93048	5.8874	5.86418	5.88238	6.47421	6.30806	6.0544	5.95945	6.3795	6.42586	6.1661	6.37373	6.18885	6.52032
Cers2_ENSMUST00000015858	6.18384	6.02123	5.88308	5.9578	6.03489	6.26232	6.15821	6.13971	6.22511	6.29412	6.22297	5.8821	6.21405	6.08518	6.11659
Capza2_ENSMUST00000015877	7.37101	7.36596	7.53702	7.44052	7.34227	7.46758	7.26005	7.39332	7.37467	7.25637	7.38373	7.29638	7.47148	7.42944	7.28288
Vps45_ENSMUST00000015891	4.33211	4.49465	4.56223	4.92572	4.53368	4.337	4.61569	4.23109	4.46052	4.67704	4.38074	4.64893	4.6827	4.75229	4.68751
Prpf3_ENSMUST00000015892	8.1302	7.93312	8.07281	8.00279	7.91829	8.25164	8.08346	7.96828	7.82741	7.94903	8.23349	8.06116	8.25626	8.15044	7.96915
Aph1a_ENSMUST00000015894	5.72172	5.76414	5.54319	5.50759	5.72714	5.58323	5.53617	5.45841	5.72389	5.4785	5.31969	5.45426	5.59007	5.64928	5.59913
Ppil4_ENSMUST00000015901	6.81994	6.62638	6.82234	6.84716	6.71662	7.03894	7.0362	6.92287	6.80331	6.86064	7.05457	6.9422	7.01607	7.0776	6.92859
Cnih1_ENSMUST00000015903	6.61632	6.32229	6.35172	6.15516	6.3216	6.25549	6.1725	6.40006	6.23222	6.20077	6.31761	6.15948	6.41752	6.18885	6.17144
Med22_ENSMUST00000015920	4.04719	3.91987	4.30243	3.85934	3.84247	4.21558	3.99902	3.7899	3.98637	4.08268	3.89212	3.72718	4.02034	4.10022	4.04496
Surf1_ENSMUST00000015934	4.95953	5.03955	4.83693	5.02134	4.63466	4.68076	4.98937	5.0123	5.01692	5.29045	4.76964	4.81833	4.84543	4.90472	4.90451
Qdpr_ENSMUST00000015950	6.41622	6.51997	6.47451	6.52299	6.61934	6.63545	6.64774	6.5939	6.55155	6.67611	6.59686	6.61906	6.75446	6.74912	6.81834
Lcorl_ENSMUST00000016026	2.8662	2.82554	3.39635	3.09186	3.1055	2.87595	2.37506	3.18724	3.5732	2.46337	2.30716	2.37355	2.64636	2.90852	2.27942
Lta4h_ENSMUST00000016033	7.99874	7.93237	8.1213	8.04321	7.91662	7.82555	7.86075	7.89383	7.81482	7.60156	7.79004	7.77402	7.98512	7.87248	7.60965
Rrbp1_ENSMUST00000016072	8.44191	8.70465	8.11854	8.28576	8.54101	8.29057	8.56488	8.25413	8.39516	8.43235	8.19774	8.42106	8.03938	8.17353	8.51474
Macroh2a1_ENSMUST00000016081	7.60727	7.52248	7.52737	7.33282	7.50228	7.41798	7.35328	7.68107	7.55107	7.29473	7.64825	7.45764	7.46315	7.34639	7.39724
Gtf2ird2_ENSMUST00000016086	2.31651	2.40616	2.87657	2.71665	2.14027	2.55847	2.72439	2.73003	2.69499	2.62749	2.30716	2.66305	2.31705	2.44719	2.44688
Adss_ENSMUST00000016105	7.855	7.96001	7.96863	7.99176	7.92495	8.06016	8.18136	7.88836	7.97191	8.14463	8.16572	8.22321	8.00248	8.06105	8.25459
Fnta_ENSMUST00000016138	6.83096	6.56543	6.70977	6.53923	6.59866	6.77331	6.69005	6.65957	6.75964	6.57516	6.82195	6.6689	6.6737	6.51234	6.659
Wasf3_ENSMUST00000016143	3.53891	3.7106	3.68144	3.63587	3.8977	3.98731	3.80729	3.71775	3.74229	3.90211	3.97893	4.0616	3.77312	4.03215	4.20542
Plpp1_ENSMUST00000016144	5.77974	5.54485	5.53771	5.49098	5.71181	5.43395	5.44968	5.83891	5.64785	5.51669	5.65239	5.30616	5.57468	5.54079	5.55855
Celsr1_ENSMUST00000016172	4.60459	4.96481	4.50716	4.74844	5.1658	4.31089	4.71271	4.56849	4.93203	4.8532	4.602	4.95469	4.89584	5.31308	4.62774
Tmbim1_ENSMUST00000016309	4.8337	4.78267	4.79155	4.52196	4.8875	4.29765	4.1336	4.71158	4.90852	4.2929	3.97893	4.08975	4.39797	3.73955	4.07083
Lonrf3_ENSMUST00000016383	2.51177	2.97364	2.91093	2.9773	2.50284	2.83988	2.84345	2.62875	2.5199	2.49772	2.09035	2.62509	2.81301	2.87783	2.56083
Atp5e_ENSMUST00000016396	6.07372	5.85926	6.00337	5.815	6.01941	6.00167	5.74174	6.16706	5.8801	5.73758	6.21852	5.91394	6.27244	5.65834	5.80587
Ctsz_ENSMUST00000016400	6.74229	6.5905	6.50856	6.56524	6.69339	6.49466	6.50378	6.61392	6.61283	6.56305	6.38273	6.2589	6.40886	6.54201	6.65259
Prelid3b_ENSMUST00000016401	5.96454	5.74365	5.83469	5.815	5.6688	5.96446	5.75319	5.9322	5.83093	5.7012	5.96571	5.80353	5.80973	5.59841	5.82501
Ube2a_ENSMUST00000016452	6.73644	6.52598	6.44844	6.22962	6.37609	6.92735	6.65589	6.61723	6.50724	6.52608	6.98287	6.64063	6.61474	6.36795	6.3721
Slc25a5_ENSMUST00000016463	9.9081	9.84039	10.0843	9.90442	9.92547	10.161	9.9669	10.067	9.86329	10.0262	10.178	10.0743	10.1242	10.0039	10.0813
Ppdpf_ENSMUST00000016488	5.66947	5.34627	5.48167	5.43565	5.43678	5.45198	5.17108	5.61888	5.50626	5.30022	5.43932	5.11394	5.27483	5.02166	5.31504
Nkap_ENSMUST00000016553	5.09977	4.99402	5.31211	4.97432	5.07887	5.13973	5.08912	5.21808	5.34049	4.95561	5.26028	4.87605	5.33999	5.23651	5.0086
Pds5b_ENSMUST00000016569	7.06519	7.32747	7.24721	7.47682	7.40676	7.09357	7.43257	7.17494	7.45597	7.45629	7.16746	7.37569	7.24232	7.38647	7.4251
Ndufa1_ENSMUST00000016571	6.09521	5.89376	5.81215	5.65649	5.87895	6.14158	6.03229	6.04951	5.78326	5.79396	5.99203	5.70688	6.02317	5.64928	5.73076
Ppfibp1_ENSMUST00000016631	6.0891	6.24423	6.17219	6.2371	6.43328	5.70853	5.87698	6.07861	6.29249	6.14497	5.77268	5.96042	6.06232	6.08182	6.17144
Cd34_ENSMUST00000016638	3.0024	2.92594	2.43227	2.20819	2.79234	3.07526	2.69303	1.60228	1.86339	2.1107	2.71379	2.06869	2.58624	2.40476	2.27942
Lnx2_ENSMUST00000016664	4.59601	4.32114	4.50716	4.48889	4.50728	4.15816	4.39955	4.17831	4.18531	4.34099	4.31553	4.19717	4.39797	4.17787	4.2286
Dyrk3_ENSMUST00000016670	6.80697	6.78183	7.00238	7.0953	7.04792	7.1388	7.10484	6.79137	6.96302	6.87051	7.094	7.03017	6.98148	6.9598	6.909
Mapkapk2_ENSMUST00000016672	4.86262	4.796	4.85468	5.00388	4.81045	4.17273	4.22415	4.56849	4.76538	3.84988	4.41228	4.08975	4.48286	4.23953	3.99176
Cul4a_ENSMUST00000016680	5.92052	6.1796	5.98736	6.05421	6.21147	5.66281	5.89087	5.9946	6.17919	5.82473	5.86104	5.76477	5.82282	5.94044	5.86253
Foxred2_ENSMUST00000016696	4.89098	5.00554	4.68641	4.83652	4.97356	4.75042	4.91655	4.66117	4.84802	4.8532	4.42779	5.08626	4.46628	5.03563	4.74489
Myh9_ENSMUST00000016771	7.86665	8.78204	8.17881	8.826	8.58532	7.90842	8.78119	8.18222	8.82486	8.83673	7.96902	8.86362	8.02388	8.76152	8.79742
Ift27_ENSMUST00000016781	3.55672	3.37985	3.7207	3.11372	3.19641	3.98731	3.46136	3.47675	3.32947	3.83652	4.28178	3.70915	3.79984	3.61479	3.60578
Ttll1_ENSMUST00000016897	3.78542	3.79268	3.70121	4.1512	3.79961	3.63414	3.68508	3.41725	3.86949	3.95251	3.22075	3.53582	3.60151	4.05977	3.83448
Ttll12_ENSMUST00000016901	6.53329	6.55371	6.39484	6.50656	6.38095	6.30924	6.4296	6.23325	6.38269	6.37719	6.33005	6.28044	6.16864	6.34289	6.26408
Mrps18c_ENSMUST00000016977	6.07372	5.77764	6.18277	5.87062	5.84774	6.31582	6.05714	6.06414	5.85879	5.89084	6.20508	6.07046	6.10579	5.87976	5.96269
Kctd5_ENSMUST00000017090	5.74521	5.56055	5.9424	5.87382	5.72714	5.69345	5.68309	5.85582	5.55249	5.68265	5.77874	5.56368	5.67911	5.73741	5.67701
Sdc4_ENSMUST00000017153	6.4571	6.2023	6.69506	6.25443	6.01005	6.41722	6.26605	6.71312	6.39965	6.299	6.51207	6.36925	6.19907	6.11839	5.85511
Krt42_ENSMUST00000017270	2.89449	2.57028	2.33442	2.56623	3.21827	3.56953	3.83629	2.91348	3.03602	3.88923	3.89212	4.0036	3.22148	3.10685	3.69168
Rnd3_ENSMUST00000017288	4.00889	4.08097	4.27632	4.39383	4.14598	4.21558	4.24593	4.10478	4.08403	4.03669	4.41228	4.18417	4.39797	4.46279	4.1458
Brca1_ENSMUST00000017290	7.78872	7.81453	7.59627	7.74625	7.80188	8.05131	8.14994	7.9302	8.01037	8.34954	8.27911	8.30803	8.14083	8.30769	8.3052
Coa3_ENSMUST00000017332	4.84098	4.60477	4.60482	4.32053	4.38699	4.40029	4.35014	4.5821	4.51602	4.45902	4.7201	4.47842	4.41536	4.32166	4.31775
Med24_ENSMUST00000017354	6.43801	6.74794	6.36727	6.8324	6.75264	6.50333	6.83539	6.38849	6.77921	6.94709	6.49377	6.71255	6.50941	7.0365	6.94618
Psmd3_ENSMUST00000017365	8.50462	8.43174	8.44954	8.41572	8.49474	8.51446	8.44704	8.44777	8.39463	8.33061	8.40691	8.40364	8.3564	8.35652	8.39564
Casc3_ENSMUST00000017384	6.67253	6.55567	6.73874	6.65928	6.46334	6.5543	6.21176	6.6787	6.53245	6.30871	6.37875	6.24958	6.42612	6.18885	6.38762
Exosc10_ENSMUST00000017408	7.82867	7.85011	7.75951	7.72333	7.68606	8.09787	8.08723	7.73993	7.72516	8.01054	8.04894	8.04328	7.87007	7.82299	7.9308
Glod4_ENSMUST00000017430	6.61419	6.68844	6.69506	6.7388	6.67967	6.47715	6.58718	6.74069	6.71291	6.71677	6.64743	6.79394	6.81465	6.8255	6.67174
Dnttip1_ENSMUST00000017443	5.15927	5.24787	5.23285	5.17478	5.12009	5.16181	5.00222	5.37487	5.19749	4.97402	4.95236	5.07222	5.0815	5.1428	4.72873
Mpp2_ENSMUST00000017458	2.83735	2.47407	2.17396	2.95326	2.39181	2.02796	1.85766	3.03721	2.87556	2.42818	2.30716	1.95086	2.64636	2.12003	2.03841
Traf4_ENSMUST00000017530	5.16509	5.19854	5.39938	5.37359	5.33041	5.36583	5.53175	5.10948	5.24049	5.20986	5.40837	5.56368	5.23622	5.50608	5.27107
Aldoc_ENSMUST00000017534	4.24691	4.67858	4.32808	4.30161	5.57026	4.74067	4.86119	5.41344	5.37949	5.33388	5.12407	5.38779	5.0815	5.03563	5.10568
Stac2_ENSMUST00000017544	2.54784	2.50686	2.91093	2.74494	2.46677	2.60219	1.73982	2.33924	2.13049	2.23807	2.76354	2.58609	2.52351	2.06659	2.1397
Rpl19_ENSMUST00000017548	10.1962	10.0496	10.3797	10.1233	10.1643	10.5151	10.2275	10.5254	10.0656	10.1671	10.5688	10.3251	10.5035	10.2264	10.2218
Nek8_ENSMUST00000017549	1.98935	2.13965	2.43227	2.36222	2.39181	2.46684	2.33498	2.27365	2.87556	2.49772	2.1663	2.54601	2.3892	2.67852	2.4068
Cacnb1_ENSMUST00000017552	2.13873	2.29791	2.43227	2.43348	2.27151	2.36899	2.16251	2.40198	2.32059	2.15442	2.49561	2.46236	2.70408	2.22131	2.56083
Plxdc1_ENSMUST00000017561	3.75488	3.85767	3.13089	3.55829	3.63059	3.98731	4.14524	3.88081	3.85726	4.48493	4.02045	3.79715	4.23133	4.04603	4.04496
Arl5b_ENSMUST00000017562	4.39286	4.68576	4.58368	4.56227	4.61831	4.56401	4.62403	4.52687	4.40281	4.60796	4.56038	4.68629	4.90817	4.81034	4.78453
Psmd11_ENSMUST00000017572	8.47916	8.2746	8.45318	8.33486	8.27314	8.65472	8.47497	8.44218	8.23784	8.30234	8.64535	8.50054	8.64037	8.43769	8.45642
Pipox_ENSMUST00000017597	5.95114	6.18468	5.98333	6.09873	5.77217	6.13416	6.21176	6.02481	6.14691	6.38639	6.04329	6.28044	6.10043	6.02692	6.07244
Cyba_ENSMUST00000017604	5.34498	5.21848	5.40542	5.11643	5.20465	4.99963	5.13068	5.20054	5.43401	5.18372	4.89771	4.83506	4.7932	4.97166	5.19074
Timp2_ENSMUST00000017610	3.0024	3.04235	2.5239	2.79991	2.98317	2.31746	1.91316	3.18724	3.01417	2.74654	2.1663	2.27891	2.81301	3.32735	1.38634
Cant1_ENSMUST00000017620	4.20234	4.16555	4.03292	4.06406	4.16861	4.15816	4.01178	3.92421	4.21436	4.39667	4.2646	3.9737	4.1712	4.19042	4.19369
Zc3h18_ENSMUST00000017622	7.04483	7.15847	7.09679	7.24146	7.26168	6.97386	7.20274	7.11769	7.15629	7.11416	7.01404	7.14362	7.0692	7.17866	7.18112
Top2b_ENSMUST00000017629	7.10659	7.43573	7.40014	7.68734	7.71036	6.89035	7.34195	7.32211	7.63314	7.34866	6.80422	7.30691	7.35696	7.51422	7.33854
Igfbp4_ENSMUST00000017637	2.39781	2.09721	2.11624	2.03572	2.63872	1.39408	1.73982	2.51982	2.28452	2.27815	2.23845	1.52555	1.55521	1.62407	2.27942
Suz12_ENSMUST00000017692	7.83233	8.1156	7.96863	8.26698	8.22267	7.55778	7.9372	7.92887	8.24958	8.04143	7.70187	8.00128	7.83336	8.01506	7.97516
Atad5_ENSMUST00000017694	6.72073	7.07757	6.79501	7.02206	7.22436	6.99246	7.39164	6.9831	7.29306	7.44533	7.06701	7.57182	7.11513	7.39733	7.52793
Rab11fip4_ENSMUST00000017783	3.70783	3.75222	3.3719	3.6509	3.51172	3.67565	3.79257	4.0273	3.83249	4.01314	3.70108	4.13098	3.90202	3.55783	3.8791
Wsb1_ENSMUST00000017821	6.94693	7.05419	7.28207	7.31524	7.01708	6.8569	7.02365	7.07741	7.12476	6.94553	7.00631	7.10103	7.45477	7.29359	6.98752
Rnf135_ENSMUST00000017839	1.49339	1.52298	1.0251	1.8398	1.37244	2.60219	2.29376	1.97667	1.33829	2.42818	2.43549	2.46236	1.55521	2.06659	2.27942
Ada_ENSMUST00000017841	4.73547	4.5028	4.41442	4.18256	4.07588	4.11353	4.29898	4.10478	4.0735	3.83652	4.3966	3.84748	3.85183	3.82248	3.80395
Serinc3_ENSMUST00000017851	8.05544	8.03499	7.93668	7.84675	7.87938	7.80113	7.77722	7.97086	7.8767	7.77527	7.71774	7.73333	7.87479	7.81288	7.67754
Wfdc2_ENSMUST00000017867	5.54114	5.3508	5.23963	4.98028	5.32538	5.01588	4.96987	5.59893	5.4746	5.10792	5.36068	4.67704	4.73901	4.41013	4.79233
Ghdc_ENSMUST00000017891	3.34754	3.68218	3.29595	2.79991	3.32286	2.83988	3.24052	3.32312	3.27536	2.93382	2.76354	3.16445	3.1814	3.49854	3.55167
Slc12a7_ENSMUST00000017900	8.10772	8.13932	8.06902	8.05102	8.07775	7.54663	7.67558	7.90741	8.02	7.8985	7.713	7.79981	7.93629	7.96392	7.7474
Zswim1_ENSMUST00000017908	5.45354	5.52498	5.22605	5.40938	5.67672	5.5941	5.80912	5.56507	5.79292	6.06704	5.94968	6.15615	5.51143	5.78782	6.10097
Crk_ENSMUST00000017920	5.66947	5.47614	5.74233	5.54024	5.64075	5.72346	5.46368	5.65796	5.49447	5.44808	5.76048	5.37641	5.70054	5.68074	5.42948
Mlx_ENSMUST00000017945	5.09977	4.8984	5.09772	5.09461	5.04257	5.35309	5.16537	4.95068	4.89662	5.09676	5.23404	5.10017	5.31242	5.09021	5.06118
Retreg3_ENSMUST00000017946	5.611	5.50077	5.2992	5.22586	5.3602	5.32074	5.30158	5.41344	5.29589	5.30991	5.5848	5.37641	5.30312	5.17472	5.32045
Rab5a_ENSMUST00000017975	6.40889	6.64491	6.56628	6.74582	6.5903	6.24863	6.57002	6.4822	6.75471	6.49666	6.28391	6.56994	6.48492	6.54201	6.58909
Ift52_ENSMUST00000018002	5.30339	5.39963	5.17749	5.25073	5.37973	5.45198	5.5581	5.37487	5.34488	5.34807	5.41617	5.57866	5.55913	5.50106	5.40934
Mybl2_ENSMUST00000018005	8.78045	8.67024	8.75035	8.69755	8.76962	8.93511	8.73958	8.77257	8.68486	8.71791	8.86139	8.70603	8.66419	8.59163	8.73759
Ptgis_ENSMUST00000018113	4.7967	5.03394	4.70611	4.91953	4.94106	4.56401	4.36016	5.06171	4.89064	4.60796	4.06081	4.49955	4.25082	4.29867	4.29597
Ddx27_ENSMUST00000018143	7.67406	7.62218	7.68579	7.57365	7.57926	7.85634	7.86075	7.55043	7.49299	7.76119	7.84884	7.74444	7.71728	7.6373	7.72924
Rac3_ENSMUST00000018156	3.24141	3.62358	3.13089	3.09186	3.21827	3.54733	3.58611	3.53389	3.5732	3.288	3.45075	3.33878	3.29844	3.13308	2.82691
Rrp7a_ENSMUST00000018184	6.11938	5.8433	5.94655	5.89922	5.83718	6.19966	5.89776	6.14889	5.93639	5.91963	6.06825	6.02744	6.14279	5.75018	5.99007
Cyb5r3_ENSMUST00000018186	7.77737	7.81535	7.66581	7.63351	7.768	8.03744	8.00581	7.8911	7.8767	8.09571	8.05894	8.01969	8.00104	7.98927	8.23254
Ints2_ENSMUST00000018212	6.52427	7.17896	6.63211	7.24641	7.29291	6.60354	7.24661	6.54956	7.15254	7.25261	6.47895	7.25658	6.55717	7.16442	7.24645
Csnk1d_ENSMUST00000018274	6.5445	6.72025	6.66014	6.84389	6.80955	6.58186	6.75224	6.58379	6.81758	6.67235	6.55509	6.58733	6.46836	6.61828	6.66113
Med1_ENSMUST00000018304	5.90669	6.12256	6.01131	6.34269	6.13021	6.2103	6.27402	5.88905	6.1987	6.42929	5.94968	6.33438	6.189	6.15725	6.20688
Stard3_ENSMUST00000018311	3.21922	3.53097	3.243	3.58982	3.59762	2.87595	3.12775	3.4473	3.41537	3.47203	3.22075	3.47308	3.57081	3.47822	3.41692
Vmp1_ENSMUST00000018315	6.78825	6.95519	6.67771	6.84389	6.78595	6.75648	7.01575	6.74069	6.85342	6.85734	6.96438	6.9499	6.97563	7.02078	6.94092
Cdc73_ENSMUST00000018337	7.45532	7.33433	7.38188	7.29625	7.32349	7.64919	7.52675	7.45009	7.42731	7.34983	7.46867	7.38566	7.35245	7.29068	7.38569
Stk4_ENSMUST00000018353	6.06441	5.94551	5.92149	6.01409	5.98476	6.14528	6.14668	5.85582	5.95372	5.84822	6.14064	6.03832	5.79652	5.78782	6.02358
Zcchc10_ENSMUST00000018383	5.19951	4.92897	5.26641	5.02711	5.29484	5.39719	5.37753	5.31907	5.27766	5.38065	5.54268	5.21325	5.32167	5.13633	5.38891
Pld2_ENSMUST00000018429	1.8227	2.44052	2.28289	3.13526	3.28193	1.66539	1.54279	1.97667	3.14061	2.95869	1.27321	2.41863	2.3892	2.56749	1.74891
Psmb6_ENSMUST00000018430	8.15526	8.21134	8.26433	8.20214	8.17037	8.30635	8.29147	8.19113	8.14156	8.21018	8.24448	8.26084	8.28254	8.19937	8.24396
Spag7_ENSMUST00000018431	6.93506	6.7835	6.98232	6.68689	6.67967	6.95922	6.82999	6.98566	6.83171	6.84905	7.01661	6.87706	7.11513	6.91137	6.81452
Pfn1_ENSMUST00000018437	8.68296	8.53271	8.77853	8.49593	8.54912	8.87177	8.6023	8.87564	8.60027	8.45383	9.03793	8.73361	8.68405	8.45793	8.56908
Prpf8_ENSMUST00000018449	9.86385	10.4815	10.1138	10.5205	10.5017	10.0946	10.6748	10.0549	10.4653	10.5272	9.92683	10.5466	10.2182	10.5975	10.4973
Tomm34_ENSMUST00000018466	6.97037	6.72548	6.91622	6.74756	6.65384	7.17544	7.0094	6.91751	6.82388	7.03158	7.35562	7.12843	7.21281	6.74912	7.08122
Ywhab_ENSMUST00000018470	8.0772	7.95557	8.17881	7.98288	7.95374	8.18311	7.95714	8.18445	7.94038	7.8319	8.16225	7.89761	8.06851	7.83901	7.81691
Stk3_ENSMUST00000018476	5.84642	5.72287	5.72312	5.81166	5.70408	5.35309	5.27535	5.8218	5.90407	5.57416	5.54978	5.47041	5.76297	5.60311	5.38891
Ksr1_ENSMUST00000018478	2.68372	2.97364	3.4204	3.13526	3.38216	2.76492	3.12775	2.40198	3.19991	2.93382	2.71379	3.16445	2.9143	3.20903	2.66644
Cep95_ENSMUST00000018516	4.51633	4.49465	4.34074	4.48889	4.35774	4.06748	4.28852	4.24827	4.39437	4.05987	4.2646	4.30916	4.21156	4.43142	4.37079
Vezf1_ENSMUST00000018521	4.75874	4.48645	4.87222	4.78295	4.54237	4.337	4.59038	4.81893	4.82937	4.52712	4.45833	4.58114	4.12968	4.55299	4.2286
Cuedc1_ENSMUST00000018522	1.93591	2.47407	2.22946	2.6878	2.09373	1.66539	0.940123	2.27365	2.24753	1.58018	1.52475	1.15115	1.42397	1.83052	1.11503
Mrm1_ENSMUST00000018549	2.74715	2.8513	2.22946	2.36222	2.53803	2.15081	2.01813	2.62875	3.16065	2.68824	2.09035	2.54601	2.16094	2.67852	2.76485
Kansl1_ENSMUST00000018556	5.64886	5.83364	5.76128	5.99361	5.96873	5.66281	5.94179	5.5719	5.82152	6.06704	5.64577	5.94123	5.80973	6.12494	6.07244
Drg2_ENSMUST00000018568	6.91966	7.03183	6.86676	6.97058	7.00769	6.89914	6.995	6.80013	6.89587	6.93617	6.82195	6.87099	6.8374	6.90947	6.87636
Dhx40_ENSMUST00000018569	6.48992	6.77848	6.71464	6.9525	6.78961	6.54313	6.87785	6.75278	6.85803	6.7792	6.60712	6.86081	6.57275	6.81946	6.72568
Akap1_ENSMUST00000018572	8.05935	8.10225	7.89546	7.85164	7.98357	8.2072	8.1215	7.99904	7.97545	8.17546	8.15644	8.06559	8.06439	7.94368	7.20469
Nol11_ENSMUST00000018577	8.20481	8.15621	8.23497	8.21673	8.13991	8.35189	8.39804	8.12293	8.10195	8.30477	8.33056	8.30428	8.36425	8.29686	8.27491
Rpain_ENSMUST00000018593	3.55672	3.37985	3.86786	3.27761	3.67869	3.52479	3.28327	3.53389	3.60279	3.41924	3.75126	3.42969	3.4746	3.55783	3.31234
Appbp2_ENSMUST00000018625	7.33792	7.46627	7.54661	7.51633	7.4719	7.32482	7.44557	7.33221	7.56899	7.39951	7.37375	7.51586	7.47977	7.50797	7.50082
Adora2b_ENSMUST00000018644	2.68372	2.50686	2.11624	1.89133	2.46677	2.72593	2.25132	2.20494	2.13049	1.97097	1.73888	2.01098	1.88963	1.54812	2.23433
Ncor1_ENSMUST00000018645	7.04167	7.38703	7.19241	7.56276	7.52438	7.05476	7.52564	7.03598	7.4751	7.53386	7.17437	7.43313	7.16479	7.53034	7.52208
Trpv2_ENSMUST00000018651	2.54784	2.53892	2.33442	2.24826	1.99588	1.96237	2.45202	2.05684	2.48854	2.65818	1.83509	1.82253	1.88963	1.83052	2.36558
Cenpv_ENSMUST00000018653	6.69683	6.60382	6.65001	6.67958	6.55423	6.28262	6.27931	6.60728	6.4514	6.17712	6.33005	6.36925	6.43466	6.21365	6.04332
Cwc25_ENSMUST00000018685	5.19951	5.00554	5.42338	5.3645	5.34041	5.23307	5.09513	5.49485	5.20233	5.1245	5.21629	5.21963	5.43679	5.42347	5.25987
Pip4k2b_ENSMUST00000018691	5.20517	5.0999	5.08274	5.24579	5.21011	5.16181	5.31709	4.8753	5.10745	5.43927	5.05582	5.32404	5.33086	5.38579	5.40934
Ybx2_ENSMUST00000018698	2.77784	2.63104	2.69136	2.50138	2.70215	1.66539	1.67709	2.62875	2.48854	2.62749	2.09035	1.88812	1.27958	2.40476	2.18779
Gabarap_ENSMUST00000018711	5.77214	5.36428	5.85247	5.68962	5.35528	6.04191	5.91486	5.74524	5.67249	5.5981	6.15469	5.74278	6.07331	5.70717	5.71443
Phf23_ENSMUST00000018716	6.61207	6.43094	6.59561	6.56524	6.48604	6.68204	6.34888	6.55992	6.46959	6.37489	6.7742	6.41168	6.45161	6.33443	6.49426
G3bp1_ENSMUST00000018727	9.74533	9.71181	9.90947	9.73913	9.6798	10.0117	9.85401	9.96909	9.71683	9.79018	9.98074	9.90394	9.94772	9.73781	9.91113
Mief2_ENSMUST00000018743	3.91535	4.00267	3.70121	3.63587	3.95089	3.69597	3.89259	3.61557	3.75553	3.82304	3.79976	4.0036	3.99744	3.70499	4.07083
Shmt1_ENSMUST00000018744	8.03414	8.10627	8.02461	8.15021	8.04142	8.22304	8.24492	8.02668	8.06787	8.16347	8.20677	8.24684	8.03938	8.12289	8.23898
Dusp14_ENSMUST00000018792	1.88041	2.40616	2.84138	2.9288	2.14027	2.15081	2.45202	2.27365	2.48854	2.23807	2.37275	2.62509	2.45792	2.8144	2.1397
Tada2a_ENSMUST00000018795	6.72861	6.48542	6.46876	6.41489	6.44955	6.83417	6.67207	6.84598	6.62008	6.62457	6.73108	6.56744	6.75446	6.49728	6.63101
Pnpo_ENSMUST00000018803	4.3729	4.20605	4.22263	4.4805	4.39661	4.31089	4.4567	4.36309	4.39437	4.35979	4.21181	4.55108	4.28904	4.60076	4.56539
Cog1_ENSMUST00000018805	5.41011	5.5409	5.31211	5.67131	5.5745	5.31418	5.74174	5.29447	5.5487	5.84488	5.34442	5.77781	5.72165	5.84844	5.89549
Slc25a39_ENSMUST00000018821	5.41988	5.80756	5.50996	5.92417	6.13884	5.40955	5.53617	5.54436	5.77353	5.78356	5.08547	5.59839	5.23622	5.65382	5.6386
Aatf_ENSMUST00000018841	6.75392	6.55958	6.60088	6.58885	6.53694	6.76131	6.66804	6.67553	6.53053	6.61483	6.91294	6.76586	6.62971	6.52726	6.58011
Dync1h1_ENSMUST00000018851	9.11544	9.97703	9.32351	9.86106	9.78218	9.36325	10.1883	9.36531	9.97748	10.1148	9.18667	10.0844	9.28106	9.88737	10.126
Ap2b1_ENSMUST00000018875	8.65585	8.54707	8.65667	8.57143	8.49642	8.7979	8.61333	8.69719	8.55321	8.68661	8.85424	8.71453	8.71069	8.55814	8.58825
Pex12_ENSMUST00000018877	3.90148	3.80591	3.88524	3.57414	3.6142	4.27081	3.90633	3.74221	3.48059	3.96484	4.3966	3.9737	4.23133	3.96072	4.18187
Ndel1_ENSMUST00000018880	3.98278	3.76583	4.16687	4.10829	3.91118	4.21558	4.11005	4.08579	4.08403	4.09395	3.97893	3.83089	4.23133	4.28703	3.69168
Mpdu1_ENSMUST00000018905	7.1483	6.87426	6.72915	6.6159	6.80594	7.21294	6.97721	6.99332	6.80808	7.08762	7.09643	6.93446	6.86612	6.69292	7.10176
Fxr2_ENSMUST00000018909	7.79811	7.68262	7.8093	7.89725	7.84203	7.4572	7.38429	7.81965	7.64741	7.44753	7.55067	7.39978	7.64544	7.58837	7.45242
Atp5g3_ENSMUST00000018914	8.82201	8.65523	8.92859	8.64317	8.69753	8.93244	8.65564	9.01073	8.69219	8.62579	9.02332	8.73249	8.92988	8.65467	8.67306
Cd68_ENSMUST00000018918	4.61313	4.32114	3.90241	3.98325	4.4804	4.99963	4.85412	4.78403	4.6282	4.55185	4.56038	4.49955	4.02034	4.08686	4.56539
Avpi1_ENSMUST00000018965	5.2108	4.99979	5.13453	4.97432	4.96712	5.52195	5.27535	5.06171	5.09188	5.15172	5.62573	5.51261	5.59771	5.46537	5.2025
Sfrp5_ENSMUST00000018966	2.77784	2.47407	1.9278	2.03572	2.09373	2.97905	2.66097	2.40198	1.86339	1.97097	2.71379	2.54601	2.70408	2.8144	2.48587
Rad51d_ENSMUST00000018985	2.68372	2.63104	2.05612	2.20819	2.14027	2.31746	2.45202	2.4621	2.13049	2.46337	2.37275	2.12419	2.16094	2.36103	1.6146
Pank3_ENSMUST00000018990	4.97286	4.70001	4.96506	4.83652	4.61831	4.60757	4.38981	4.71158	4.75882	4.45027	4.51752	4.3329	5.07057	4.43142	4.48105
Rars_ENSMUST00000018992	8.91643	8.9427	8.87847	8.82393	8.87013	9.11895	9.0715	8.9064	8.8563	8.93323	9.07227	9.07156	8.93139	8.90496	8.95684
Wwc1_ENSMUST00000018993	4.56993	4.84811	4.31532	4.62449	4.71373	4.32401	4.85412	4.59558	4.83561	4.88599	4.41228	4.61059	4.08694	4.2753	4.94005
Otop3_ENSMUST00000019006	2.39781	2.09721	2.5239	2.6283	2.60593	3.25035	2.89948	3.69288	2.48854	2.71768	3.25594	3.42969	3.7459	2.90852	3.47622
Mrpl45_ENSMUST00000019026	6.95534	7.07893	6.90774	7.10352	6.96308	7.13509	7.17888	6.97538	7.12985	7.18042	7.19037	7.30241	7.04148	7.21134	7.24218
P4ha2_ENSMUST00000019050	4.34241	4.75564	4.55138	4.60919	5.42743	4.56401	4.38981	4.94015	4.94941	4.68452	4.78176	4.70461	5.13494	4.98612	4.43198
Tm4sf5_ENSMUST00000019063	3.3879	3.39745	2.47881	2.53417	3.38216	2.91114	2.06788	2.77813	2.85111	3.16514	2.81163	2.70005	2.58624	2.8144	2.76485
Pelp1_ENSMUST00000019065	8.54477	8.54707	8.51521	8.54603	8.51199	8.48848	8.52202	8.51139	8.50406	8.5567	8.50158	8.5987	8.472	8.53127	8.64103
Med11_ENSMUST00000019067	4.40275	4.31189	4.71585	4.33921	4.48942	4.69092	4.07398	4.66117	4.51602	4.35042	4.69468	4.17105	4.43253	4.25156	4.1458
Alox15_ENSMUST00000019068	3.07835	3.36204	3.15975	3.45932	2.60593	1.66539	2.2076	2.13279	2.96943	1.44588	1.83509	1.25425	1.55521	1.38306	1.21125
Natd1_ENSMUST00000019075	4.00889	3.60855	3.73994	3.52605	3.51172	3.52479	3.0556	3.29033	3.01417	2.88274	2.90327	3.24176	3.00893	2.99688	3.02524
Map2k3_ENSMUST00000019076	4.9325	5.11593	4.773	4.95629	5.05477	4.91548	5.00222	4.83038	4.81679	4.88599	4.93075	5.01465	5.02601	4.96438	5.08042
Scml2_ENSMUST00000019101	1.98935	1.31653	1.25642	1.55029	1.65484	1.17996	1.39469	1.49125	1.11003	1.13272	1.73888	1.35046	0.732092	2.40476	1.81164
Ywhah_ENSMUST00000019109	8.32725	8.20636	8.25934	8.18933	8.13704	8.51517	8.22997	8.32565	8.1905	8.04652	8.47382	8.2747	8.41049	8.23689	8.29082
Sart3_ENSMUST00000019118	7.26801	7.16362	7.25392	7.0898	7.19297	7.44675	7.29441	7.27889	7.10551	7.20662	7.2998	7.09236	7.3159	7.06914	7.29803
Gga3_ENSMUST00000019135	5.69784	5.56834	5.79386	5.57217	5.69242	5.77689	5.63438	5.78108	5.52184	5.5981	5.63244	5.69318	5.66465	5.76283	5.6124
Slc35b4_ENSMUST00000019143	4.07217	4.13441	4.13816	4.31111	4.26628	3.77451	4.15678	4.04706	4.20474	4.15979	4.02045	3.84748	3.63157	3.97529	4.1088
Dalrd3_ENSMUST00000019183	4.07217	4.39307	3.83245	3.98325	3.93777	4.03595	4.31966	4.17831	4.15567	4.24315	3.95771	4.18417	4.21156	4.22741	3.99176
Fis1_ENSMUST00000019198	4.91879	4.88599	5.14899	5.10556	4.98636	5.08685	4.8822	5.02232	5.09709	4.96791	5.03572	4.69547	4.98002	5.00044	4.90451
Plod1_ENSMUST00000019199	6.75392	6.53197	6.47164	6.5533	6.66383	6.18895	6.28458	6.65635	6.72305	6.97173	6.49745	6.4529	6.73383	6.70608	6.78941
Strn4_ENSMUST00000019220	6.13725	6.10927	6.06187	6.25689	6.21147	6.02193	6.03854	5.97925	6.19141	6.06989	5.92802	5.86183	6.00032	5.9662	5.8736
Mfsd3_ENSMUST00000019224	2.23036	2.44052	2.05612	2.24826	1.71758	2.20853	1.67709	2.05684	2.04683	2.46337	2.37275	2.58609	2.58624	2.01109	2.23433
Slc25a22_ENSMUST00000019226	3.80045	4.13441	3.96914	3.94718	3.95089	4.01992	4.06175	3.81317	4.1755	4.08268	3.75126	4.04732	3.4746	4.22741	4.1088
Med8_ENSMUST00000019229	5.84642	5.55664	5.69875	5.46571	5.46448	5.83302	5.58825	5.61888	5.55249	5.46554	5.81459	5.63706	5.71465	5.55541	5.4144
Atp6ap1_ENSMUST00000019231	6.82729	6.70267	6.65255	6.67591	6.73758	7.122	7.10186	6.83465	6.758	7.03596	6.95638	6.92277	7.01892	7.0417	7.11426
Scrn1_ENSMUST00000019268	4.59601	4.76244	4.18101	4.50552	4.21284	4.76011	4.83987	4.43985	4.43607	4.60008	4.36471	4.47842	4.08694	4.42082	4.40171
BC005537_ENSMUST00000019276	1.41744	1.81248	1.71099	1.89133	1.94435	1.4903	1.73982	1.89178	1.81363	2.06561	2.60882	1.75382	1.78654	2.01109	2.1397
Tmem160_ENSMUST00000019302	4.87687	4.54288	4.65635	4.69869	4.65884	5.43999	5.33244	4.69914	4.62099	5.25072	5.35257	5.45966	5.19656	5.1233	5.37859
Mdh2_ENSMUST00000019323	9.22427	9.18926	9.3429	9.24904	9.2569	9.23893	9.07036	9.27863	9.1262	9.03505	9.16601	9.09302	9.10211	9.06935	9.06943
Rnf145_ENSMUST00000019333	5.90669	6.1998	5.69875	5.91487	6.24647	5.65245	5.98775	5.76923	6.15941	5.97555	5.67856	5.96422	5.49518	5.82047	6.12588
Atp6v1e1_ENSMUST00000019354	7.36975	7.09519	7.38647	7.31524	7.15805	7.45273	7.40622	7.42765	7.27134	7.2298	7.57177	7.29789	7.43146	7.23878	7.27873
Mlh3_ENSMUST00000019378	4.48876	5.10527	4.47308	4.86901	5.15451	4.44899	4.93007	4.52687	5.23104	5.06847	4.44314	5.07926	4.6827	4.98612	4.98157
Tecr_ENSMUST00000019382	8.12946	8.12949	8.06806	7.93764	8.10367	8.10453	8.03425	8.16084	8.06322	8.20305	8.14475	8.08058	8.26587	8.13024	8.24538
Ripk4_ENSMUST00000019386	3.72369	4.16555	4.30243	4.28244	4.20191	3.54733	4.01178	3.81317	4.08403	4.04833	3.59514	4.01832	3.77312	3.88556	4.07083
Map1s_ENSMUST00000019405	6.84552	7.06524	6.95378	7.12923	7.0264	6.87484	6.94429	6.89588	6.9458	6.96561	6.75895	6.9422	6.70585	6.96529	7.08281
Tmem129_ENSMUST00000019439	2.35774	2.57028	1.99339	2.39829	2.60593	2.46684	2.52509	2.68028	2.32059	2.1107	2.55332	2.58609	2.07605	2.74806	2.08994
Nop9_ENSMUST00000019441	6.80138	6.58475	6.75538	6.73704	6.69144	6.67181	6.70389	6.63692	6.66987	6.57918	6.79827	6.78536	6.51748	6.54446	6.54822
Rnf31_ENSMUST00000019443	4.7967	4.97657	4.82796	4.88816	5.11427	4.9749	4.96987	4.8642	4.86033	5.25072	5.16167	5.0509	5.15577	5.33585	5.19663
Psmc3ip_ENSMUST00000019447	4.31128	4.34854	4.62566	4.56227	4.28711	4.61825	4.41885	4.315	4.48457	4.56	4.75741	4.52039	4.90817	4.39936	4.0836
Grb7_ENSMUST00000019456	6.73644	6.82147	6.51416	6.47101	6.64982	6.21382	6.14379	6.61723	6.6751	6.12037	6.28817	6.04193	5.8677	5.91421	6.08201
Psme3_ENSMUST00000019470	7.57813	7.37375	7.5246	7.38768	7.4455	7.73024	7.52675	7.52247	7.44273	7.37084	7.71774	7.44816	7.43998	7.40139	7.41124
Zfp687_ENSMUST00000019482	5.23866	5.13703	5.21234	5.29445	5.49166	4.94973	5.0401	5.21808	5.3666	5.25575	4.78176	4.95469	4.63898	5.13633	5.17293
D8Ertd738e_ENSMUST00000019506	5.22201	4.80261	5.09772	4.8496	5.02407	5.2191	4.93678	5.13741	4.96658	5.00421	5.21629	5.07926	5.22641	5.07676	4.78453
Calm3_ENSMUST00000019514	6.71875	6.64675	6.73635	6.63303	6.69144	6.72963	6.46485	6.92019	6.64874	6.54878	6.74043	6.68744	6.70937	6.48205	6.41566
Cops3_ENSMUST00000019517	8.17989	8.21507	8.19022	8.19383	8.18154	8.37097	8.3142	8.21535	8.13904	8.21922	8.3961	8.36745	8.35752	8.36554	8.27351
Gipc1_ENSMUST00000019577	6.25102	6.1146	5.99939	5.87382	5.81941	5.84672	6.11745	6.11652	5.89213	5.88437	5.70426	5.76477	5.88652	5.82851	5.78257
Arhgef25_ENSMUST00000019611	2.65093	3.10794	2.94448	2.77269	2.7629	3.43092	3.30418	2.82467	3.03602	3.50618	3.29029	3.59594	3.29844	3.49854	3.53318
Xab2_ENSMUST00000019614	7.38728	7.4694	7.40617	7.52961	7.38155	7.53258	7.58878	7.30374	7.43247	7.60353	7.596	7.6753	7.66374	7.65777	7.58741
Cdc37_ENSMUST00000019615	8.03096	7.95631	7.99389	7.87822	7.87422	8.10168	7.91188	7.92086	7.82113	7.83778	8.04266	7.86336	7.97197	7.826	7.90676
Cops6_ENSMUST00000019638	7.63163	7.53545	7.65825	7.54779	7.57185	7.88095	7.88871	7.7139	7.55297	7.70809	7.96504	7.8335	7.9242	7.90424	7.84342
Ubb_ENSMUST00000019649	3.48411	3.39745	3.66141	3.37132	3.47587	3.43092	3.26205	3.81317	3.34706	3.47203	4.21181	4.04732	3.90202	3.90091	3.7569
Zkscan1_ENSMUST00000019660	3.32693	2.92594	2.56762	2.6283	2.9574	3.13602	2.59463	3.11418	2.92326	2.80257	3.14768	3.11051	3.50739	2.96802	3.41692
Ap4m1_ENSMUST00000019662	4.49801	4.73503	4.52944	4.57808	4.70602	4.2572	4.30936	4.51273	4.78487	4.75721	4.62909	4.56117	4.60908	4.62869	4.68751
Mknk1_ENSMUST00000019677	3.36786	3.30725	3.81442	3.31583	3.21827	3.33052	3.00541	3.11418	3.39859	3.2482	3.32384	3.08277	3.57081	3.13308	3.02524
Armc6_ENSMUST00000019679	5.01212	4.78935	4.91516	4.80327	4.81762	5.32727	5.04632	4.91885	4.76538	4.99221	5.45454	5.1411	4.81956	4.70935	5.06118
Dusp9_ENSMUST00000019701	7.50203	7.37042	7.63017	7.54175	7.79189	6.96342	6.71173	7.35022	7.20896	6.83903	7.03951	6.85467	7.22271	7.36726	6.84858
Arid3a_ENSMUST00000019708	3.55672	3.51494	3.53496	3.40717	3.32286	3.81223	3.58611	3.47675	3.49644	3.87623	3.62236	3.33878	3.60151	3.53834	3.55167
Ubxn6_ENSMUST00000019722	4.78919	4.63475	4.80987	4.57808	4.70602	4.92412	4.54718	4.67394	4.30717	4.7853	4.74508	4.53069	4.41536	4.58184	4.81547
Mydgf_ENSMUST00000019723	5.51405	5.39087	5.15617	5.1591	5.22098	5.34668	5.31194	5.40581	5.27306	5.30991	5.38472	4.9393	5.55129	5.14924	5.10568
Plin3_ENSMUST00000019726	7.25443	7.18277	7.19763	7.08427	6.81852	7.32645	7.1618	7.22134	7.10292	7.34983	7.57177	7.26277	7.19278	7.09606	7.15716
Cyb561_ENSMUST00000019734	3.05348	3.17068	3.13089	3.17738	3.19641	2.94549	3.00541	2.95591	3.07877	3.14361	3.10972	2.77131	3.14018	3.15885	3.07723
Sema6a_ENSMUST00000019791	2.47478	2.53892	1.54593	1.78636	1.94435	2.26402	2.48902	2.73003	2.66724	2.77483	2.01018	2.77131	0.732092	1.38306	2.18779
Ccdc12_ENSMUST00000019803	4.95282	4.91682	4.69629	4.8496	4.80323	5.03196	4.93007	4.80739	4.64252	4.6158	4.8409	4.60084	4.83255	4.62869	4.6102
Fmc1_ENSMUST00000019833	5.35519	4.8984	4.94862	4.93188	5.02407	5.17635	4.93678	5.05196	4.87253	4.96177	5.36068	4.90009	5.30312	5.02166	4.72058
Mrpl24_ENSMUST00000019854	7.01131	6.97876	6.97219	6.88419	6.90866	6.7757	6.79718	6.89315	6.84879	6.92989	6.9537	7.05001	6.79818	6.82147	6.83165
Gle1_ENSMUST00000019859	5.47243	5.52898	5.36262	5.43131	5.37488	5.84672	5.76455	5.46578	5.49052	5.62166	5.79678	5.68398	5.70054	5.62638	5.70207
Leng1_ENSMUST00000019878	3.1505	2.57028	2.84138	2.77269	2.35281	3.59139	3.47986	2.82467	2.5506	3.26824	3.75126	3.13773	3.50739	3.45761	3.15187
Polr2i_ENSMUST00000019882	5.86798	5.59527	5.67396	5.51582	5.399	5.82382	5.72245	5.52335	5.37091	5.60993	5.61222	5.66539	5.51143	5.17472	5.34717
Fbxo5_ENSMUST00000019907	7.59547	7.39908	7.4738	7.37302	7.46162	7.70415	7.67358	7.70615	7.61419	7.71175	7.8816	7.78482	7.90587	7.69236	7.66166
Mtrf1l_ENSMUST00000019908	2.23036	2.0084	2.11624	2.6283	2.63872	2.83988	2.75509	2.33924	2.28452	2.46337	2.66226	2.93543	2.70408	3.08013	2.91526
Hdac2_ENSMUST00000019911	7.91923	8.18499	8.00883	8.15087	8.0852	7.93752	8.21969	7.97603	8.1844	8.01277	7.85746	8.15574	7.9074	8.14401	8.14694
Rwdd1_ENSMUST00000019917	6.3437	6.02123	6.25809	6.26667	6.30382	6.33214	6.05097	6.38849	6.14941	6.09816	6.24065	6.05269	6.12705	6.09522	5.9453
Trmt11_ENSMUST00000019927	5.37541	5.63289	5.43523	5.66021	5.4599	5.47568	5.69105	5.31091	5.61555	5.67141	5.5848	5.62268	5.80314	5.66734	5.76286
Lrp11_ENSMUST00000019931	4.02177	4.33946	4.03292	4.27276	4.38699	4.34988	3.98613	4.08579	4.38588	4.58418	4.54623	4.35627	4.63898	4.75229	4.52852
Sec63_ENSMUST00000019937	6.64366	6.90226	6.58767	6.59274	6.89346	6.86141	6.99178	6.49665	6.83015	6.82219	6.72168	6.86285	6.68808	6.74487	7.06038
Snx3_ENSMUST00000019939	6.54672	6.53594	6.62177	6.51274	6.54561	6.59545	6.42005	6.61723	6.46758	6.37489	6.51207	6.34609	6.50941	6.48968	6.39276
Adat2_ENSMUST00000019944	4.61313	4.216	4.58368	4.47207	4.20191	4.46092	4.30936	4.48401	4.46052	4.3691	4.76964	4.41307	4.48286	4.20285	4.12124
Pex3_ENSMUST00000019945	4.89098	4.86717	4.39028	4.53012	4.65884	4.56401	4.88914	4.80739	4.80411	4.57617	4.58826	4.87605	4.5315	4.41013	4.76881
Ltv1_ENSMUST00000019950	7.18741	6.95371	6.98434	6.94337	6.92537	7.26657	7.05791	6.98822	6.8748	6.95638	7.2017	7.0174	6.95795	6.8923	7.07803
Cd164_ENSMUST00000019962	7.98648	7.77806	7.90188	7.68916	7.75871	7.82785	7.57809	8.06595	7.74354	7.803	7.83582	7.54665	7.9242	7.79039	7.71187
Smpd2_ENSMUST00000019965	4.44161	4.8417	4.46154	4.72022	4.65884	4.41262	4.6073	4.48401	4.81046	4.85982	4.24722	4.87605	4.54735	4.81845	4.91883
Mical1_ENSMUST00000019967	5.74521	5.85926	5.39938	5.51992	5.5997	6.21734	6.41285	5.5719	5.85879	6.44698	6.1312	6.24645	6.00607	6.07507	6.24147
Wasf1_ENSMUST00000019975	5.70584	5.53694	5.53771	5.56425	5.55745	5.71352	5.70684	5.42104	5.50234	5.77658	5.86674	5.79928	5.65004	5.872	5.68122
Rev3l_ENSMUST00000019986	4.63844	5.62545	4.80074	5.63019	5.76847	4.27081	5.52286	4.90809	5.63359	5.48707	4.56038	5.58362	4.63898	5.38033	5.45427
Traf3ip2_ENSMUST00000019987	3.70783	3.75222	3.3719	3.60533	3.56387	3.84899	3.76266	3.81317	3.54298	3.68078	3.59514	3.86387	3.95052	4.07338	3.56994
Tube1_ENSMUST00000019991	3.85904	4.28379	4.35328	4.3299	4.50728	3.67565	3.90633	4.43985	4.41119	4.18108	3.99984	3.84748	3.63157	3.83851	4.1458
Lama4_ENSMUST00000019992	3.24141	3.41483	3.15975	3.04712	2.7629	1.74556	2.37506	3.29033	3.05756	1.81625	2.01018	2.77131	1.78654	2.74806	2.23433
Perp_ENSMUST00000019998	4.42231	4.216	4.56223	4.23337	4.36756	4.77928	4.72827	4.59558	4.34269	3.80943	4.6688	4.45696	4.7932	4.59133	4.07083
Abracl_ENSMUST00000020002	4.73547	4.71412	4.86348	4.60147	4.37731	4.75042	4.68906	4.68659	4.56946	4.53541	4.602	4.28501	4.62411	4.36657	4.44193
Fam184a_ENSMUST00000020003	2.58303	3.12916	2.76832	3.04712	2.93117	2.20853	2.16251	2.68028	2.63895	2.19685	1.52475	1.95086	2.81301	2.2694	1.92948
Asf1a_ENSMUST00000020004	6.52427	6.42237	6.37959	6.33805	6.39781	6.59274	6.46948	6.29654	6.33279	6.31594	6.41812	6.47442	6.34227	6.33443	6.3747
Gopc_ENSMUST00000020008	4.5254	4.2743	4.61528	4.66207	4.68262	4.17273	4.34005	4.8753	4.50822	4.32195	4.48823	4.13098	4.51547	4.35547	4.26268
Qrsl1_ENSMUST00000020012	4.81901	4.76922	4.63596	4.7344	4.69826	4.96656	5.05868	4.80739	4.84183	5.02791	4.94159	5.24489	5.07057	5.04947	5.10568
Reep3_ENSMUST00000020023	4.71974	4.38427	4.47308	4.2031	4.22368	4.34988	4.36016	4.67394	4.55439	4.70671	4.62909	4.7227	4.72514	4.69181	4.39148
Serinc1_ENSMUST00000020027	7.7143	7.67723	7.52321	7.45237	7.57926	7.74738	7.62973	7.56763	7.58483	7.64914	7.78101	7.57182	7.91963	7.64757	7.61075
Ccdc59_ENSMUST00000020049	5.6195	5.40833	5.896	5.46145	5.62855	5.81455	5.65894	5.79867	5.56382	5.58218	5.84379	5.62268	5.65736	5.51109	5.6558
Lims1_ENSMUST00000020077	5.25511	5.14747	5.3249	5.1591	5.01786	5.446	5.34258	5.37487	5.22629	5.49134	5.57786	5.14781	5.62784	5.40744	5.46894
Zwint_ENSMUST00000020081	7.1527	7.12057	7.33205	7.18837	7.12227	7.53116	7.26805	7.2747	7.07812	7.21825	7.57873	7.2994	7.5225	7.32664	7.33854
Ube2d1_ENSMUST00000020085	4.5072	4.28379	4.49589	4.35765	4.32789	4.57502	4.14524	4.12351	4.41953	3.96484	4.04077	4.19717	4.06508	3.96072	4.07083
Cdk1_ENSMUST00000020099	8.86732	8.79869	8.91596	8.89745	8.91349	8.79673	8.6688	8.95363	8.80908	8.5724	8.74547	8.71679	8.85143	8.82877	8.63453
Atp2b1_ENSMUST00000020107	7.36975	7.37486	7.18189	7.10897	7.25111	7.40106	7.47352	7.29963	7.33444	7.48547	7.34952	7.50414	7.24476	7.28776	7.48887
Actr6_ENSMUST00000020109	5.46773	5.88443	5.64874	5.84471	5.7423	5.51624	5.88741	5.70226	5.91885	5.72314	5.61899	5.73389	5.42826	5.61246	5.78257
Uhrf1bp1l_ENSMUST00000020112	4.3729	5.02265	4.63596	5.33689	5.4736	4.53046	5.14234	4.71158	5.18287	5.24061	4.50295	5.26355	4.51547	5.11674	5.40934
Poc1b_ENSMUST00000020113	3.96954	3.83202	4.26309	4.14059	4.1798	2.94549	3.4044	4.0273	4.15567	3.86311	3.29029	3.69089	3.50739	3.57707	2.99852
Dusp6_ENSMUST00000020118	6.94861	6.83928	7.6633	7.52961	7.29291	6.34185	6.21176	7.08937	6.88838	6.34689	6.51207	6.34317	6.67009	6.75968	6.3564
Tmpo_ENSMUST00000020123	7.90886	7.82432	7.9727	7.77654	7.81449	8.08155	7.95549	7.98502	7.75676	7.73354	8.01853	7.90357	7.96017	7.89469	7.85464
Sgk1_ENSMUST00000020145	6.16654	6.40072	5.65888	5.8834	6.44028	7.75467	7.92881	6.40772	6.64697	8.23776	8.00825	8.12206	7.37039	7.49917	8.0535
Ikbip_ENSMUST00000020150	2.39781	2.47407	2.61006	1.8398	2.53803	1.74556	1.85766	2.82467	2.28452	2.01906	1.83509	1.88812	3.00893	3.05291	1.92948
Apaf1_ENSMUST00000020157	4.47008	5.0999	4.91516	5.34153	5.16017	4.66022	5.1539	5.0123	5.24518	5.19946	4.93075	5.30616	5.13494	5.54568	5.1305
Myb_ENSMUST00000020158	1.93591	2.0084	1.9278	1.4847	2.22908	2.55847	2.11597	2.05684	2.28452	2.71768	2.60882	2.62509	2.45792	2.06659	2.76485
Med23_ENSMUST00000020159	6.37917	6.74623	6.60351	6.81249	6.90698	6.57913	6.91401	6.47492	6.89886	6.80343	6.48267	6.92472	6.26767	6.67963	6.91616
Nedd1_ENSMUST00000020163	4.8337	5.0283	4.96506	5.11643	5.08483	4.64985	4.98937	5.10948	5.13303	4.79913	5.01532	5.10017	5.0032	5.25455	4.98837
Enpp3_ENSMUST00000020169	6.9836	7.06248	6.26142	6.47945	7.08111	7.80932	7.91188	7.3991	7.52522	8.27723	7.95169	7.99757	7.40125	7.53158	8.34485
Ccn2_ENSMUST00000020171	6.10735	6.06867	6.0465	5.89291	5.71181	6.28932	6.13214	6.2589	6.22273	6.60501	6.48267	6.38353	6.61849	6.49475	6.26127
Pex7_ENSMUST00000020182	4.67151	5.19352	4.80074	4.98028	5.07288	4.29765	4.85412	4.7722	5.05488	4.77132	4.57438	4.57119	4.56303	4.61013	4.83825
Ifngr1_ENSMUST00000020188	3.92909	4.12388	3.75892	3.87222	3.87035	4.20144	4.15678	4.06656	4.14565	3.71038	3.89212	4.07575	4.30778	4.10022	3.77275
Snrpf_ENSMUST00000020203	7.26395	7.0925	7.22178	7.13726	7.21216	7.3682	7.25468	7.46486	7.21256	7.0505	7.36572	7.10276	7.19782	7.08098	7.10333
Fgd6_ENSMUST00000020208	3.80045	3.94401	3.96914	4.10829	4.00219	3.38159	3.4044	4.17831	4.22392	3.47203	3.48081	3.65365	3.29844	3.65155	3.31234
Ndufa12_ENSMUST00000020209	7.07295	6.74279	7.24216	6.99581	6.81673	6.9904	6.79718	6.98053	6.83639	6.64196	7.01661	6.71707	7.04707	6.79091	6.50617
Cep83_ENSMUST00000020212	3.34754	3.28851	3.62048	3.62068	3.6468	3.52479	3.68508	3.56164	3.51212	3.91488	3.35663	3.81412	3.3715	3.65155	3.77275
Socs2_ENSMUST00000020215	5.05034	4.92897	4.70611	4.76234	4.67474	5.00778	4.68906	5.15573	4.83561	4.67704	4.6818	4.82672	4.21156	4.26348	4.72058
Nudt4_ENSMUST00000020217	5.8751	5.71587	5.79386	5.93342	5.9943	5.68839	5.4913	5.70226	5.71376	5.44808	5.53553	5.26971	5.65736	5.56989	5.28219
Nuak1_ENSMUST00000020220	2.65093	2.22095	1.9278	2.65835	2.35281	2.36899	2.45202	2.51982	2.58066	2.85651	1.83509	2.12419	2.16094	1.76493	2.32314
Tcp11l2_ENSMUST00000020223	2.94946	2.63104	2.87657	2.50138	2.8212	2.26402	2.29376	2.91348	2.6101	2.42818	2.60882	2.01098	2.96239	2.74806	2.52384
Cry1_ENSMUST00000020227	5.90669	5.77428	5.82121	6.07942	6.12733	5.80055	5.69501	5.72697	5.95372	5.64866	5.62573	5.61785	5.67911	5.84448	5.80202
Timp3_ENSMUST00000020234	2.13873	2.90149	2.05612	2.71665	2.9574	2.51338	2.72439	3.11418	2.5199	3.18636	2.43549	2.70005	2.64636	2.74806	3.10254
Hsp90b1_ENSMUST00000020238	10.9323	10.8762	10.7352	10.6511	10.9693	10.9382	10.8048	11.0232	10.8187	10.7352	11.0699	10.9473	11.0144	10.8577	10.9736
Washc3_ENSMUST00000020248	4.71974	4.77596	4.94033	4.53822	4.57662	4.56401	4.1336	4.67394	4.82937	4.56	4.76964	4.43519	4.7932	4.55299	4.0186
Gnptab_ENSMUST00000020251	4.67966	5.08369	4.36572	4.68415	5.05477	4.73086	5.04632	4.34724	5.01141	5.33863	4.62909	5.1411	4.60908	4.94969	5.16695
Sycp3_ENSMUST00000020252	7.0822	6.97291	7.29839	7.06897	6.95171	6.71974	6.67207	7.37975	7.19324	6.73489	6.90188	6.47975	6.59199	6.41147	6.83165
Chpt1_ENSMUST00000020253	2.97617	3.21103	2.5239	2.74494	2.67078	2.51338	2.89948	2.40198	2.99197	2.82979	3.03064	2.70005	2.75957	2.87783	2.85697
Herc4_ENSMUST00000020258	8.2575	8.35446	8.35757	8.42994	8.35497	8.28723	8.39682	8.26472	8.30239	8.26357	8.17494	8.29071	8.13952	8.21019	8.1748
Hnrnph3_ENSMUST00000020263	6.37917	6.15654	6.37344	6.31701	6.36634	6.16364	6.01654	6.46761	6.24401	6.26948	6.10248	5.96802	6.36927	6.24405	6.05957
Ccar1_ENSMUST00000020268	7.29744	7.49209	7.43449	7.58151	7.4967	7.62688	7.82412	7.4538	7.49002	7.63088	7.47802	7.59778	7.43786	7.52911	7.58517
Ddx50_ENSMUST00000020270	6.13725	6.07961	6.07329	6.19671	6.08632	6.14897	6.16965	5.90538	5.86796	5.93851	6.24065	6.32256	6.35583	6.35965	6.0002
Supv3l1_ENSMUST00000020273	6.29942	6.54781	6.15796	6.35191	6.3491	6.27251	6.60414	6.2841	6.46557	6.43151	6.44885	6.58486	6.23867	6.60194	6.53201
Macroh2a2_ENSMUST00000020283	4.46065	4.35755	4.16687	4.17218	4.47133	3.54733	3.94679	4.46944	4.38588	3.71038	3.67531	4.08975	4.08694	4.20285	3.84951
Tysnd1_ENSMUST00000020284	4.88395	4.91682	4.66644	4.94414	4.63466	4.94973	4.86119	4.62218	4.50822	4.65438	4.99464	5.02926	4.71113	4.78575	4.95402
Sar1a_ENSMUST00000020285	6.80138	6.83928	6.80646	6.72821	6.86256	6.95079	6.7427	6.76178	6.71121	6.79655	6.98025	6.8046	6.99888	6.82952	6.80684
Ppa1_ENSMUST00000020286	8.4214	8.30638	8.40429	8.39355	8.45329	8.31459	8.18347	8.40629	8.29787	8.16347	8.24448	8.24841	8.29668	8.27714	8.27699
Eif4ebp2_ENSMUST00000020288	5.87864	5.68397	5.90028	5.69325	5.67672	5.99758	5.83808	5.72697	5.64074	5.77308	5.98156	5.9257	5.74933	5.72884	5.7549
Pald1_ENSMUST00000020289	7.13946	7.40018	7.09306	7.28425	7.33229	7.02093	7.47006	7.14774	7.48407	7.49187	6.871	7.34974	6.98439	7.30805	7.60523
Ddit4_ENSMUST00000020308	4.62162	4.70001	4.54045	4.24332	4.4804	5.04786	4.68109	4.7722	4.69155	4.93695	4.28178	4.26045	4.80644	4.38852	4.43198
Mcu_ENSMUST00000020312	4.92566	4.98823	4.80987	5.11101	4.97997	4.9749	4.95011	4.91885	4.92032	5.00421	4.87525	5.01465	5.12441	5.28995	5.04822
Cand1_ENSMUST00000020315	9.7275	9.75062	9.78766	9.78668	9.8056	9.75875	9.72815	9.75297	9.70877	9.61861	9.73518	9.74569	9.71047	9.69112	9.6845
Tbk1_ENSMUST00000020316	5.19383	5.62545	5.52113	5.93649	5.76104	5.20499	5.7981	5.46578	5.76701	5.73038	5.28604	5.74278	5.47044	5.69402	5.7469
Pno1_ENSMUST00000020317	7.31847	7.13113	7.35406	7.11711	7.20122	7.54943	7.33435	7.30785	7.11837	7.13613	7.49469	7.3009	7.45056	7.33373	7.26338
Egfr_ENSMUST00000020329	3.99589	3.90764	3.62048	3.77954	4.0878	3.83072	4.04942	4.14201	4.34269	3.87623	3.5674	3.67239	3.90202	3.73955	3.89368
Tbc1d15_ENSMUST00000020339	7.81486	7.7518	7.83525	7.80957	7.71614	7.77868	7.79672	8.01544	7.86834	7.76119	7.91087	7.81148	7.85263	7.76546	7.8102
2310011J03Rik_ENSMUST00000020341	3.34754	2.8513	3.00933	2.82662	3.08185	3.25035	3.32479	3.32312	2.89961	2.98315	3.59514	3.13773	3.14018	2.67852	3.02524
Rab21_ENSMUST00000020343	4.05974	4.45319	4.62566	4.43782	4.4804	4.31089	4.31966	3.83607	4.53916	4.54365	4.04077	4.30916	4.41536	4.51359	4.51915
Pwwp3a_ENSMUST00000020365	6.20093	6.26594	5.98333	6.12318	6.0163	6.22085	6.20065	6.13971	6.29249	6.37257	6.44505	6.37211	6.2484	6.1668	6.3352
Uqcr11_ENSMUST00000020372	5.95786	5.80756	6.02314	5.84471	5.86169	6.25891	5.88741	6.0738	5.72052	6.03523	6.16861	5.94894	6.08422	5.92551	5.73076
Frs2_ENSMUST00000020381	4.33211	4.72112	4.69629	4.8496	4.73663	4.40029	4.54718	4.43985	4.78487	4.63907	4.28178	4.45696	4.46628	4.88941	4.68751
Yeats4_ENSMUST00000020382	4.95282	4.8984	4.89814	5.11101	5.21556	5.13973	4.87523	5.13741	4.93203	5.1245	5.03572	4.9159	4.51547	4.97166	5.11814
Snrpd3_ENSMUST00000020397	7.88439	7.68621	7.98787	7.77054	7.67523	7.93965	7.76408	7.96698	7.65538	7.65961	8.01725	7.73779	7.96903	7.63845	7.67015
Csrp2_ENSMUST00000020403	7.68625	7.55713	7.64045	7.56673	7.45012	7.83588	7.54553	7.76252	7.5718	7.57567	7.91913	7.72662	7.76042	7.67462	7.59968
Mdm2_ENSMUST00000020408	6.1867	6.16427	6.54456	6.57118	6.4121	6.72222	6.64569	6.24613	6.26961	6.42483	6.59686	6.63108	6.70585	6.65721	6.47985
Ap3d1_ENSMUST00000020420	6.43801	7.1219	6.68269	7.13992	7.00455	6.58731	7.2412	6.41154	6.99546	7.13204	6.61052	7.16528	6.65187	7.11756	7.1374
Mdm1_ENSMUST00000020437	3.99589	4.18594	3.88524	4.1299	4.26628	4.17273	4.0861	4.40963	4.08403	4.20207	4.44314	4.44612	4.46628	4.34429	4.25141
Timm13_ENSMUST00000020440	5.77974	5.40833	5.73276	5.60726	5.70021	5.84672	5.74938	5.66437	5.5487	5.52087	5.87242	5.69776	5.88652	5.72021	5.58573
Llph_ENSMUST00000020444	6.13132	5.97803	6.00735	6.03715	5.96227	6.28597	6.14958	6.2159	5.87101	6.00271	6.32177	6.11907	6.02317	6.06488	6.02027
Tmbim4_ENSMUST00000020446	5.58085	5.50483	5.24637	5.12184	5.29484	5.37845	5.39712	5.27784	5.40491	5.33863	5.43932	5.28805	5.40234	5.33585	5.25423
Irak3_ENSMUST00000020448	4.59601	4.5028	4.35328	4.37585	4.49838	4.76011	4.99581	4.24827	4.09448	4.81284	4.69468	4.81833	4.21156	4.38852	5.19663
Helb_ENSMUST00000020449	6.99181	7.24969	7.059	7.2685	7.31083	7.08203	7.35453	6.95199	7.29079	7.35336	7.15353	7.42071	7.10446	7.27751	7.4351
Nfic_ENSMUST00000020461	2.68372	2.3349	3.32171	2.53417	2.8212	2.76492	2.2076	2.51982	2.69499	2.71768	2.85818	2.46236	2.86454	2.87783	2.66644
Ncln_ENSMUST00000020463	6.40643	6.57898	6.33916	6.27397	6.5304	6.4475	6.63128	6.24185	6.39119	6.52816	6.32591	6.51131	6.17886	6.38715	6.70103
Hcfc2_ENSMUST00000020478	2.92223	2.94999	3.29595	3.27761	3.38216	3.07526	3.12775	2.99714	3.12029	3.00719	2.43549	3.21645	3.44104	3.20903	2.88641
Txnrd1_ENSMUST00000020484	8.5029	8.57488	8.72885	8.74997	8.66308	8.63249	8.67483	8.7844	8.78588	8.72473	8.68785	8.75024	8.63017	8.6665	8.75116
D10Wsu102e_ENSMUST00000020488	5.76066	5.6623	5.95068	5.56425	5.58295	5.82843	5.6136	5.70226	5.76374	5.606	5.81459	5.48108	5.77649	5.56508	5.40934
Wdr82_ENSMUST00000020490	7.13651	7.31247	7.1318	7.27215	7.29934	7.31828	7.39042	7.21043	7.4335	7.36154	7.22852	7.38566	7.3434	7.44654	7.50794
Pofut2_ENSMUST00000020493	4.5254	4.31189	4.39028	4.27276	4.45301	4.24346	4.20204	3.88081	4.41953	3.97707	4.10007	4.3329	4.19152	4.45241	4.26268
Adarb1_ENSMUST00000020496	3.34754	3.12916	3.18804	3.60533	3.6142	3.0439	2.9267	3.22243	3.32947	3.18636	3.07072	3.05448	3.4746	3.10685	2.99852
Aldh1l2_ENSMUST00000020497	2.54784	2.71762	2.76832	3.44214	3.43911	3.07526	3.21866	2.40198	3.19991	3.3075	2.55332	2.01098	2.31705	2.93858	3.41692
Appl2_ENSMUST00000020500	4.81161	4.82879	4.98131	4.62449	4.88066	4.337	4.52953	4.81893	4.90852	4.72857	4.41228	4.82672	4.71113	4.87394	4.8078
Sumo3_ENSMUST00000020501	4.43199	4.33033	4.42635	4.42913	4.27673	4.57502	4.49357	4.23109	4.39437	4.22275	4.64245	4.43519	4.25082	4.33302	4.53782
Hint1_ENSMUST00000020504	7.60192	7.44211	7.64173	7.47682	7.47076	7.79761	7.58771	7.80812	7.47209	7.57265	7.85459	7.62689	7.76042	7.55481	7.48166
Papolg_ENSMUST00000020513	6.30996	6.44581	6.34859	6.48575	6.53911	6.18895	6.4741	6.52863	6.54775	6.3516	6.36673	6.39203	6.148	6.48205	6.26127
Pfkl_ENSMUST00000020522	8.46685	8.67385	8.26848	8.37161	8.88814	8.47164	8.69427	8.55863	8.69348	8.71928	8.39216	8.69919	8.18457	8.40912	8.7916
Pex13_ENSMUST00000020523	6.49455	6.62825	6.38876	6.5908	6.66582	6.46832	6.5978	6.5702	6.66637	6.60107	6.64079	6.60937	6.47252	6.64359	6.64184
Rhbdf1_ENSMUST00000020524	2.23036	3.76583	1.9278	3.00095	3.54669	2.94549	3.71662	3.4473	3.84493	3.95251	3.38869	3.53582	2.9143	3.4367	3.80395
Mpg_ENSMUST00000020528	4.59601	4.45319	4.54045	4.19287	4.29741	4.09835	3.93343	4.28202	4.29815	4.21245	4.38074	4.18417	4.02034	3.78988	4.1458
Ahsa2_ENSMUST00000020529	4.71974	4.87347	4.89814	5.06126	5.09077	4.57502	4.64876	5.07139	5.04414	4.72132	4.51752	4.80989	4.60908	4.48332	4.74489
Nprl3_ENSMUST00000020530	4.31128	4.33946	4.41442	4.39383	4.22368	3.73578	4.07398	3.98694	4.32504	3.76781	3.48081	3.98872	3.99744	4.31021	3.70826
Cpeb4_ENSMUST00000020543	2.09063	2.53892	3.00933	2.77269	1.94435	2.46684	2.16251	2.05684	1.95802	2.39211	2.55332	1.88812	1.88963	2.74806	2.08994
Stc2_ENSMUST00000020546	3.96954	3.85767	3.15975	3.15647	3.66283	3.67565	3.44262	3.74221	3.27536	3.47203	3.14768	3.16445	3.26047	2.64245	3.58797
Cdc34_ENSMUST00000020550	4.57868	4.67858	4.74471	4.78976	4.61831	4.75042	4.73598	4.5821	4.35143	4.63907	4.75741	4.45696	4.5939	4.50357	4.56539
Asb3_ENSMUST00000020551	4.96621	5.08912	4.88091	4.68415	4.97356	4.82612	4.73598	4.85301	5.0224	4.64675	4.99464	4.90802	5.07057	4.71804	4.76881
Tpgs1_ENSMUST00000020552	4.19098	3.93199	3.77766	3.70949	3.77032	4.41262	4.37999	3.64181	3.78164	4.34099	4.70745	4.47842	4.30778	4.33302	4.43198
Madcam1_ENSMUST00000020554	2.68372	2.74537	2.17396	2.32523	2.42977	2.31746	2.33498	2.20494	2.17057	2.82979	2.23845	2.17763	1.98585	2.01109	2.5969
Shc2_ENSMUST00000020564	2.65093	2.77259	3.00933	2.87862	3.00848	2.97905	2.45202	2.86976	2.89961	3.03084	2.49561	2.54601	2.52351	2.90852	2.85697
Ccng1_ENSMUST00000020576	5.55893	5.63289	5.95068	5.84797	5.49614	5.85125	6.06022	5.52335	5.65846	5.8382	5.76659	5.97935	5.80314	5.84844	5.7062
Nudcd2_ENSMUST00000020578	6.50376	6.19477	6.40391	6.28846	6.23847	6.30263	6.28721	6.1939	6.16189	6.25449	6.33828	6.30165	6.53746	6.41147	6.27247
Hmmr_ENSMUST00000020579	8.47038	8.4524	8.459	8.38796	8.43416	8.54138	8.48014	8.6783	8.47635	8.45492	8.57046	8.46538	8.98039	8.67545	8.36525
Polrmt_ENSMUST00000020580	5.40028	5.86243	5.26641	5.71844	5.54885	5.66796	6.14958	5.18278	5.61192	5.9725	5.56389	5.96422	5.66465	5.89134	6.09152
Ppp2ca_ENSMUST00000020608	8.66511	8.53221	8.69105	8.5324	8.4579	8.74769	8.49386	8.68777	8.50161	8.39125	8.70943	8.46269	8.58672	8.50389	8.50171
Flt4_ENSMUST00000020617	3.77023	3.66775	3.73994	3.72378	3.91118	3.38159	3.03073	3.5056	3.34706	3.22788	3.32384	3.4943	3.4746	3.55783	3.45673
Cnot6_ENSMUST00000020624	4.05974	4.14487	4.10886	4.39383	4.4622	3.73578	3.86472	3.94542	4.1755	4.12725	3.97893	4.47842	4.04288	4.29867	4.12124
Gfpt2_ENSMUST00000020629	7.2241	7.48388	7.41517	7.55978	7.85168	7.67374	7.98654	7.48129	7.8227	8.0356	7.84452	8.04238	7.76042	8.06616	8.22392
Hspa4_ENSMUST00000020630	10.3977	10.5285	10.4841	10.5278	10.5335	10.5741	10.6246	10.5303	10.4914	10.4925	10.6365	10.6783	10.5943	10.6136	10.5982
Mapk9_ENSMUST00000020634	4.67966	4.75564	4.66644	4.80998	4.7517	4.61825	4.78886	4.69914	5.0224	4.79913	4.6688	4.80141	4.6827	4.91987	4.80008
Rack1_ENSMUST00000020640	10.4672	10.6364	10.789	10.7246	10.7142	10.7924	10.8241	10.8255	10.6614	10.8214	10.8488	10.9712	10.8954	10.856	10.8866
Rufy1_ENSMUST00000020643	4.21361	3.97949	4.15259	4.21326	4.31781	4.03595	4.12187	3.7899	4.33389	4.02497	3.89212	4.3329	3.97417	3.90091	4.12124
Mrnip_ENSMUST00000020647	3.92909	3.80591	3.59957	3.37132	3.40139	3.71601	3.56894	4.0273	3.75553	3.40121	3.91432	3.53582	3.63157	3.49854	3.49546
Rad50_ENSMUST00000020649	7.28012	7.97107	7.36495	7.82041	7.83762	6.66925	7.39164	7.45749	7.83833	7.52764	6.67694	7.39415	6.80809	7.27898	7.25494
Sar1b_ENSMUST00000020653	6.24279	6.07415	6.17925	6.06266	6.11281	6.37373	6.06022	6.04951	6.00727	6.16113	6.13593	6.04552	6.36481	5.95522	6.10724
Jade2_ENSMUST00000020655	5.30865	5.19352	5.24637	5.20055	5.11427	4.38785	4.40924	4.96113	5.25454	4.19162	4.13829	4.43519	4.21156	4.13957	4.3392
Ube2b_ENSMUST00000020657	6.37415	6.00123	6.45718	6.31701	6.14741	6.02595	6.03542	6.33322	6.19628	6.12037	6.07811	5.97558	6.22887	6.34007	5.97986
Kremen1_ENSMUST00000020662	2.74715	2.74537	2.69136	2.16696	2.73284	2.31746	2.01813	2.51982	2.80092	2.68824	2.23845	2.70005	2.86454	2.52849	2.66644
Slu7_ENSMUST00000020681	6.3941	6.25874	6.26142	6.26179	6.18119	6.56815	6.46717	6.3211	6.30154	6.44037	6.47148	6.56243	6.38259	6.46408	6.33253
Hus1_ENSMUST00000020683	5.13577	5.12124	5.09772	5.24579	5.29998	4.70101	4.64876	4.96113	5.00033	4.88599	4.62909	4.62989	4.75275	4.76073	4.8078
Pttg1_ENSMUST00000020687	6.86173	6.71148	7.09866	6.86015	6.76569	6.60085	6.23916	6.86559	6.54012	6.41812	6.47148	6.14614	6.88184	6.64814	6.24147
Btg2_ENSMUST00000020692	3.6918	3.41483	4.12359	3.83323	3.4939	4.38785	4.40924	3.56164	3.76864	3.71038	4.19378	3.77997	4.04288	3.98972	3.51444
Tns3_ENSMUST00000020695	8.00281	8.36008	7.89009	8.24424	8.21318	8.70947	9.03014	7.98502	8.28652	8.95696	8.77534	9.03674	8.42343	8.78187	9.10195
Castor1_ENSMUST00000020699	5.07527	5.30025	4.64619	4.94414	5.41329	5.58867	5.71856	5.22677	5.30942	5.75898	5.52114	5.72045	4.87086	5.18102	5.57672
Igfbp3_ENSMUST00000020702	4.89799	4.796	4.49589	4.31111	4.26628	4.75042	4.40924	4.63529	4.58437	4.66953	4.53195	4.42417	4.76636	4.44195	4.27386
Pes1_ENSMUST00000020705	8.34658	8.66707	8.4282	8.61423	8.63339	8.49429	8.76855	8.46532	8.62573	8.63931	8.47382	8.68196	8.33714	8.61508	8.71109
Arf5_ENSMUST00000020717	6.52879	6.61703	6.51416	6.5291	6.72045	6.50908	6.45319	6.64018	6.69928	6.54468	6.50843	6.64775	6.60341	6.62291	6.68646
2310033P09Rik_ENSMUST00000020719	4.47008	4.49465	4.15259	4.14059	4.27673	4.36265	4.50265	4.37877	4.21436	4.2732	4.50295	4.22282	3.71815	4.17787	4.1458
Drg1_ENSMUST00000020741	7.99303	8.11494	7.93355	8.0756	7.96348	8.20985	8.34353	7.91281	8.03365	8.14598	8.24558	8.33768	7.99816	8.09397	8.19185
Mtif2_ENSMUST00000020749	5.82454	5.99257	5.76128	5.88658	5.87895	6.03794	6.1668	5.79867	5.93639	6.20077	5.93889	6.10535	5.84222	6.13795	6.22428
Cfap36_ENSMUST00000020754	3.9427	4.2743	4.06378	4.24332	4.23445	4.17273	4.17959	4.60894	4.24284	4.13818	4.45833	4.24802	4.57855	4.2753	4.18187
Ppp4r3b_ENSMUST00000020755	6.42352	6.54584	6.41592	6.64622	6.62753	6.40184	6.65182	6.30477	6.589	6.5671	6.32177	6.61906	6.57275	6.6885	6.51797
Pnpt1_ENSMUST00000020756	7.04325	7.69957	7.08556	7.5697	7.6178	7.03495	7.71222	7.29344	7.77881	7.68685	6.96171	7.72998	7.25927	7.72615	7.80732
Polm_ENSMUST00000020767	3.55672	3.44898	2.97727	2.77269	2.70215	2.97905	2.69303	3.29033	2.72221	2.71768	2.66226	2.66305	2.64636	2.48841	2.7
Pgam2_ENSMUST00000020768	2.68372	2.25994	2.11624	1.94108	2.35281	2.31746	1.31452	2.27365	2.48854	2.68824	1.63578	2.73612	2.75957	2.64245	2.48587
Dynll2_ENSMUST00000020775	5.73742	5.60666	5.82572	5.78125	5.4507	5.53892	5.14234	5.72697	5.57133	4.72132	5.47709	5.11394	5.37595	4.94229	4.88276
Ccdc117_ENSMUST00000020776	5.39038	5.39087	5.57568	5.3916	5.55316	5.72346	5.5711	5.54436	5.56382	5.47419	5.72952	5.67006	5.9771	5.72884	5.71443
Ska2_ENSMUST00000020794	4.47945	4.20605	4.76363	4.4805	4.28711	4.74067	4.37011	4.67394	4.51602	4.35979	4.57438	4.39062	4.98002	4.76073	4.3069
Smg8_ENSMUST00000020801	6.11638	6.38317	6.37344	6.71039	6.76939	6.29599	6.50152	6.158	6.56852	6.64004	6.29241	6.53965	6.38259	6.64359	6.71341
Gdpd1_ENSMUST00000020804	3.42716	3.49873	3.51276	3.29684	3.58084	1.89366	2.25132	3.29033	3.12029	2.19685	2.66226	1.95086	2.45792	2.31595	2.1397
Mrpl22_ENSMUST00000020820	6.40889	6.35418	6.36107	6.24208	6.30126	6.39874	6.3639	6.36112	6.25337	6.33744	6.51571	6.28957	6.4808	6.43801	6.4106
Cnot8_ENSMUST00000020822	6.30734	6.54189	6.29432	6.5189	6.44955	6.1961	6.62714	6.50381	6.58158	6.51354	6.09764	6.37211	6.28668	6.36242	6.56425
Sap30l_ENSMUST00000020826	2.31651	2.87661	2.56762	2.74494	2.7629	2.60219	2.84345	2.77813	2.39013	2.23807	2.94699	3.05448	2.45792	2.67852	2.79621
Rnft1_ENSMUST00000020827	5.11187	4.91682	4.83693	4.78295	4.85996	5.00778	4.76644	5.0123	4.87253	4.96791	5.13356	4.88411	4.73901	4.76912	4.8973
Fam114a2_ENSMUST00000020831	6.15489	5.93048	6.06949	5.96082	6.08334	6.08107	5.85943	6.10713	6.08009	6.02054	6.10248	6.02015	5.94155	5.79605	5.82881
Ppm1d_ENSMUST00000020835	5.38541	5.78099	5.76128	5.85448	6.02872	5.76732	5.98775	5.53038	5.82466	5.80772	5.81459	6.00914	5.71465	5.91421	5.85882
Srebf1_ENSMUST00000020846	6.88659	6.98314	6.66518	6.66299	6.98237	6.76612	6.8027	6.7796	6.8748	6.98995	6.54801	6.73945	6.62224	6.77434	6.85231
Tom1l1_ENSMUST00000020849	5.27677	4.96481	5.16331	4.93802	4.86689	5.45198	5.08912	5.05196	5.07085	5.07417	5.25158	5.04373	5.27483	4.77746	4.76881
Cox11_ENSMUST00000020851	4.02177	4.7488	4.46154	4.61686	4.84598	4.38785	4.57325	4.51273	4.68465	4.35042	4.38074	4.85159	4.39797	4.46279	4.55626
Bzw2_ENSMUST00000020856	7.75054	7.54436	7.67833	7.5367	7.56972	7.97749	7.84479	7.75953	7.60417	7.7892	8.17034	7.87958	8.09841	7.80882	7.82073
Pctp_ENSMUST00000020864	2.8662	2.47407	3.3719	2.79991	2.98317	2.20853	2.66097	3.03721	3.03602	1.92122	2.30716	1.60572	2.75957	1.89326	2.27942
Twistnb_ENSMUST00000020877	6.3047	6.27786	6.30728	6.31229	6.08334	6.23133	6.25804	6.24613	6.31054	6.21632	6.14534	6.2244	6.10043	6.3316	6.06923
Nampt_ENSMUST00000020886	7.4338	7.64076	7.44917	7.57167	7.68998	7.38238	7.72972	7.6921	7.81086	7.71996	7.52746	7.68571	7.5205	7.60604	7.62064
Tspan13_ENSMUST00000020896	5.88218	5.65134	5.50996	5.41379	5.56173	5.70352	5.48215	5.68344	5.53341	5.56203	5.44695	5.44339	5.74246	5.56989	5.60799
Matn3_ENSMUST00000020899	4.40275	4.12388	3.85026	3.98325	4.28711	3.86702	3.56894	4.39428	4.38588	3.98919	3.82341	4.07575	4.28904	4.004	3.83448
Rock2_ENSMUST00000020904	6.12834	6.4352	6.60351	6.69053	6.69534	6.48008	6.70782	6.49305	6.5853	6.61678	6.47522	6.6782	6.387	6.58303	6.6113
E2f6_ENSMUST00000020908	4.24691	4.00267	4.18101	4.04143	4.00219	3.63414	3.97314	3.92421	3.94074	3.84988	3.67531	3.76259	3.97417	3.85437	3.67491
Laptm4a_ENSMUST00000020909	8.19134	8.2268	8.30445	8.18288	8.12985	8.34467	8.24289	8.31957	8.1984	8.16881	8.33879	8.26084	8.48338	8.32842	8.17256
Sdc1_ENSMUST00000020911	5.64053	5.47614	5.14178	4.93802	5.24247	5.93485	5.5754	5.41344	5.24518	5.29534	5.76659	5.52812	5.31242	5.43406	5.46894
Hs1bp3_ENSMUST00000020927	5.72566	5.56055	5.83469	5.49098	5.21556	5.51624	5.43079	5.73309	5.61918	5.30507	5.49192	5.37068	5.36704	5.38579	5.29323
Gna13_ENSMUST00000020930	5.63635	5.60666	5.90455	5.82165	5.7423	5.68331	5.52731	5.72083	5.77028	5.408	5.67856	5.63706	5.57468	5.74593	5.5168
Smc6_ENSMUST00000020931	6.58628	7.10727	6.73874	7.27094	7.14812	6.50333	7.17463	6.77369	7.12476	7.1618	6.59686	7.26123	6.86296	7.29214	7.10019
Rdh14_ENSMUST00000020947	2.92223	2.68934	2.84138	2.6878	2.18536	1.96237	1.85766	1.80159	2.72221	1.44588	2.66226	2.54601	2.45792	2.2694	1.98497
Map2k6_ENSMUST00000020949	2.61738	2.79931	1.9278	1.67315	2.27151	2.55847	2.72439	1.60228	1.81363	2.71768	3.10972	2.62509	3.3715	3.39395	2.73279
Adi1_ENSMUST00000020957	5.611	5.3598	5.71342	5.59177	5.57026	5.86478	5.69501	5.71467	5.60828	5.55797	5.80868	5.79928	5.54341	5.55541	5.71853
Rnaseh1_ENSMUST00000020959	4.23589	4.216	4.09399	4.3299	4.34786	4.38785	4.37999	4.16027	4.35143	4.30265	4.31553	4.13098	3.71815	4.26348	4.15792
Ubxn2a_ENSMUST00000020962	5.55893	5.39963	5.46443	5.37359	5.46905	5.69849	5.6052	5.44358	5.46657	5.63329	5.4621	5.74721	5.91735	5.84844	5.63426
Fkbp1b_ENSMUST00000020964	1.63425	1.45739	1.25642	1.73087	1.89091	1.96237	1.6115	1.37095	1.65317	1.64292	1.40446	1.15115	2.24111	1.09355	1.38634
Rnf144a_ENSMUST00000020971	2.71578	2.68934	3.07139	2.50138	2.35281	2.55847	2.11597	2.57531	2.72221	1.92122	2.01018	2.58609	2.70408	2.01109	2.32314
Dus4l_ENSMUST00000020977	3.84461	4.02548	3.81442	3.91019	3.67869	3.75527	3.42364	3.71775	3.94074	3.60403	3.45075	3.47308	3.71815	4.11345	3.53318
Rrm2_ENSMUST00000020980	8.94714	8.98332	9.04577	8.98862	9.04926	9.12365	9.06386	9.11798	9.01846	9.1613	9.20592	9.19332	9.13133	9.08497	9.15282
Klf11_ENSMUST00000020982	4.58737	4.76244	4.65635	4.63209	4.76661	4.53046	4.24593	4.51273	4.78487	4.6158	4.38074	4.22282	4.15059	4.28703	4.32852
Dnajc27_ENSMUST00000020986	2.09063	2.13965	2.33442	2.6283	1.89091	1.74556	2.41405	2.33924	2.20956	2.35511	1.83509	2.27891	2.07605	2.67852	1.6146
Dnmt3a_ENSMUST00000020991	7.48818	7.53743	7.73695	7.72511	7.54831	7.40106	7.43731	7.34424	7.3949	7.51407	7.4517	7.3814	7.43146	7.45696	7.50676
Kif3c_ENSMUST00000020999	1.88041	1.75904	1.99339	2.28726	1.83541	1.82151	2.06788	2.33924	2.20956	2.1107	0.96836	1.52555	1.78654	1.95338	2.08994
Rab10_ENSMUST00000021001	6.3437	6.56153	6.3105	6.44753	6.40259	6.30263	6.56786	6.36112	6.4776	6.46879	6.41812	6.44475	6.58047	6.54446	6.4604
Taf15_ENSMUST00000021018	7.67814	7.58235	7.81158	7.64575	7.47644	7.78225	7.59197	7.70304	7.57553	7.45956	7.83582	7.52877	7.21777	7.20053	7.56368
Itgb3_ENSMUST00000021028	3.26327	3.191	2.84138	2.95326	3.26102	2.02796	2.29376	2.40198	3.18041	2.49772	1.92529	2.27891	3.22148	3.05291	2.82691
Mettl2_ENSMUST00000021030	5.41011	5.33262	5.36262	5.16435	5.10843	5.67309	5.53617	5.40581	5.28224	5.4956	5.52114	5.54347	5.3936	5.18729	5.47864
Lig3_ENSMUST00000021039	6.90929	6.81984	6.93929	6.99875	7.03258	7.00269	6.93427	6.93087	6.98847	6.89004	6.9157	6.87099	6.6845	6.86907	7.00105
Cct6b_ENSMUST00000021040	3.9427	3.73848	4.03292	3.88499	3.87035	4.27081	3.60309	4.04706	3.98637	3.60403	4.08057	3.53582	4.15059	3.83851	3.77275
Ddx42_ENSMUST00000021046	8.23831	8.14128	8.33877	8.27124	8.17805	8.32196	8.24964	8.26472	8.14093	8.19848	8.31396	8.23822	8.313	8.28667	8.26022
Ftsj3_ENSMUST00000021048	8.46567	8.75798	8.40955	8.64317	8.70578	8.76462	9.01198	8.47173	8.6827	8.98674	8.68865	8.9313	8.53399	8.71669	9.04066
Psmc5_ENSMUST00000021049	8.54198	8.52423	8.56594	8.48287	8.43882	8.76342	8.67934	8.51937	8.47335	8.54186	8.81274	8.74693	8.67235	8.5987	8.59105
Adap2_ENSMUST00000021050	1.76258	1.81248	1.99339	2.16696	2.18536	1.17996	1.79994	2.13279	1.65317	2.06561	1.73888	1.95086	2.07605	2.12003	1.68332
Smarcd2_ENSMUST00000021052	6.0891	6.21724	6.07329	6.2246	6.10697	6.09261	6.05406	6.04951	6.19385	6.35862	6.05832	6.28957	6.28668	6.36242	6.14732
Polg2_ENSMUST00000021060	2.71578	3.432	3.26972	3.17738	3.30254	3.33052	3.19646	3.29033	3.46456	2.80257	3.25594	3.33878	3.00893	2.99688	3.47622
Ddx5_ENSMUST00000021062	10.8412	10.7069	10.9899	10.7823	10.6989	11.1661	10.9022	11.0683	10.7547	10.8391	11.1902	10.989	11.1891	10.955	10.9257
Psmd12_ENSMUST00000021063	8.70908	8.60311	8.72945	8.67384	8.63745	8.88953	8.81208	8.67513	8.5739	8.58643	8.85208	8.78078	8.77775	8.65918	8.66246
Slc9a3r1_ENSMUST00000021077	6.77309	6.58091	6.57434	6.48575	6.52603	6.23481	5.98775	6.63039	6.46959	5.9101	6.19151	6.03108	5.98875	5.91421	5.83259
Fdxr_ENSMUST00000021078	3.99589	4.46992	3.73994	4.44646	4.01474	3.40647	3.77769	3.94542	4.27076	3.76781	3.51025	3.55614	4.1712	4.07338	3.95054
Nt5c_ENSMUST00000021082	4.36281	4.22588	4.18101	4.10829	3.98954	4.22959	4.22415	4.5821	4.10486	4.10514	4.38074	4.13098	4.38038	4.38852	4.28496
Jpt1_ENSMUST00000021083	6.97865	6.84891	6.96404	6.78381	6.84861	6.94018	6.89518	7.07981	6.76946	6.76693	7.06453	6.80884	6.94304	6.80321	6.76979
Nup85_ENSMUST00000021085	7.60513	7.69157	7.53289	7.62402	7.60955	7.8023	7.92712	7.5487	7.69713	7.78486	7.83873	7.85826	7.59294	7.68684	7.74137
Mif4gd_ENSMUST00000021087	4.32173	4.40181	4.68641	4.52196	4.29741	4.40029	4.52953	4.64829	4.39437	4.51878	4.58826	4.58114	4.36257	4.10022	4.65366
Grb2_ENSMUST00000021090	6.72664	6.57898	6.56358	6.53923	6.47474	6.77092	6.57433	6.63039	6.47159	6.57315	6.86246	6.5574	6.88184	6.72561	6.58011
Pafah1b1_ENSMUST00000021091	7.9218	8.15751	8.19197	8.18611	8.01825	7.79996	8.01615	8.11007	8.10648	7.93107	7.96105	8.1075	8.06851	8.08392	8.01736
Recql5_ENSMUST00000021097	4.43199	4.36651	4.23624	4.1299	4.42508	4.32401	4.57325	4.46944	4.6567	4.68452	4.76964	4.79287	4.19152	4.49348	4.69584
Itgb4_ENSMUST00000021107	4.72762	4.78935	4.48453	4.44646	4.45301	4.48447	4.77395	4.42482	4.49249	4.83316	4.21181	4.68629	4.8582	5.11674	4.59244
Galk1_ENSMUST00000021114	7.33792	7.41213	7.14088	7.15713	7.44897	7.22173	7.30742	7.30169	7.35741	7.24504	7.20395	7.40959	6.9873	7.14843	7.17964
Unk_ENSMUST00000021116	3.50261	3.39745	3.15975	3.15647	3.36266	3.90243	3.77769	3.38655	3.18041	3.79569	3.48081	3.47308	3.3715	3.51858	3.70826
Ten1_ENSMUST00000021130	3.24141	2.94999	3.4204	3.02422	3.12877	3.63414	3.00541	3.41725	3.05756	3.12175	3.22075	3.33878	3.22148	3.25753	3.10254
Srp68_ENSMUST00000021133	7.49628	7.50432	7.53427	7.54477	7.45588	7.32156	7.38061	7.48311	7.48606	7.28247	7.40544	7.39556	7.39469	7.44915	7.24645
Tsen54_ENSMUST00000021134	4.24691	4.40181	4.34074	4.67683	4.22368	4.12856	4.2567	4.56849	4.4766	4.39667	4.22963	4.3329	4.19152	4.10022	3.99176
Ncbp3_ENSMUST00000021135	6.23728	6.09317	6.12542	6.21957	6.27282	6.31254	6.16108	6.23756	6.08796	6.1903	6.28817	6.27432	6.23378	6.26199	6.20979
Exoc7_ENSMUST00000021147	4.82637	4.87347	4.94033	4.86901	4.7887	4.72098	5.04632	4.80739	4.75882	4.85982	5.00502	4.92374	4.66828	4.8817	4.86808
Ube2g1_ENSMUST00000021148	6.16364	5.93952	6.2175	6.02855	6.07737	6.20321	5.94179	6.13971	6.03738	5.8746	6.15469	5.99432	6.22887	6.04084	6.06923
Tekt1_ENSMUST00000021155	2.68372	2.37097	2.47881	2.39829	2.18536	2.55847	2.59463	2.05684	2.89961	2.68824	1.83509	2.83921	2.45792	2.44719	2.32314
Med31_ENSMUST00000021157	4.84823	4.59718	4.80987	4.63964	4.53368	4.80757	4.78142	4.76028	4.70526	4.56811	5.03572	4.63944	4.72514	4.83452	4.29597
Txndc17_ENSMUST00000021158	6.38914	6.13834	6.34859	6.02855	6.23042	6.46832	6.13506	6.4822	6.13683	5.99972	6.28391	6.11223	6.26287	5.94415	5.97986
Slc13a5_ENSMUST00000021161	3.83004	3.96776	4.13816	4.02998	4.42508	3.25035	2.9267	3.88081	3.78164	3.41924	3.10972	2.66305	3.66101	3.65155	3.12742
Pimreg_ENSMUST00000021164	4.7967	4.5109	4.59429	4.56227	4.65083	4.24346	4.17959	4.74826	4.80411	4.22275	4.2646	4.36781	4.51547	4.47309	4.26268
Mxra7_ENSMUST00000021170	2.97617	2.79931	2.69136	2.71665	2.46677	2.51338	2.37506	2.51982	2.63895	2.35511	2.55332	2.01098	2.24111	2.01109	2.4068
Mfsd11_ENSMUST00000021173	3.53891	3.60855	3.07139	3.19799	3.05781	3.47862	3.56894	3.53389	3.48059	3.65057	3.45075	3.72718	3.87714	3.51858	3.62337
Sec14l1_ENSMUST00000021177	6.08604	6.36092	6.32649	6.4389	6.60074	6.22085	6.36639	6.19833	6.43504	6.51354	6.40642	6.45561	6.36481	6.52478	6.52267
Eral1_ENSMUST00000021183	5.33985	5.59908	5.43523	5.60726	5.27933	5.50477	5.66299	5.38267	5.6264	5.58618	5.40837	5.60328	5.45372	5.63558	5.66432
Dhrs13_ENSMUST00000021187	3.64262	3.81903	3.51276	3.77954	3.45761	3.90243	3.79257	3.64181	3.85726	3.92753	3.91432	4.07575	3.33543	3.66958	3.58797
Blmh_ENSMUST00000021197	8.16037	8.16587	8.25517	8.30903	8.11827	8.18401	8.22587	8.18557	8.20142	8.03779	8.15528	8.10233	8.03938	8.10478	8.06722
Cpd_ENSMUST00000021201	5.54114	5.54485	5.38112	5.49098	5.64479	5.24001	5.47756	5.20054	5.43401	5.43927	5.06577	5.30015	5.89893	5.95522	5.43447
Timm22_ENSMUST00000021203	4.67151	4.59718	4.54045	4.37585	4.40616	4.70101	4.34005	4.66117	4.56194	4.34099	4.6818	4.08975	4.30778	4.44195	4.32852
Nxn_ENSMUST00000021204	4.7967	4.82229	4.54045	4.46358	4.7887	4.337	4.35014	4.64829	4.58437	4.3315	4.28178	4.37926	4.28904	4.39936	4.41187
Luc7l3_ENSMUST00000021226	7.52484	7.35587	7.61593	7.54175	7.46506	7.78225	7.66046	7.42198	7.35197	7.40969	7.80497	7.64834	7.72252	7.66566	7.50082
Lrrc59_ENSMUST00000021239	8.10999	7.93914	8.03827	7.86781	8.01357	8.24217	7.90163	7.91146	7.79573	7.95367	8.2379	7.99478	8.23316	8.06701	8.06963
Slc35b1_ENSMUST00000021243	5.7138	5.75734	5.47595	5.7041	5.86516	5.79585	5.82367	5.61226	5.53725	5.5981	5.65897	5.57866	5.5824	5.54079	5.88459
Snx11_ENSMUST00000021246	1.93591	1.96186	2.05612	2.46783	2.35281	2.91114	3.0556	2.20494	2.35578	2.88274	2.90327	2.62509	3.05402	2.78161	2.5969
Scrn2_ENSMUST00000021249	3.6592	3.432	3.49022	3.68049	3.30254	3.63414	3.53396	3.7899	3.48059	3.73938	3.64908	3.65365	3.82607	3.97529	3.62337
Per1_ENSMUST00000021271	4.04719	4.10259	4.18101	4.42038	4.35774	4.5191	4.6073	4.23109	4.59913	4.83987	4.57438	4.83506	4.54735	4.46279	4.91169
Vamp2_ENSMUST00000021273	2.68372	2.63104	2.38418	1.89133	2.42977	2.91114	2.9267	2.77813	2.5199	2.23807	2.60882	2.90406	2.58624	2.36103	2.5969
Pfas_ENSMUST00000021282	8.36376	8.80076	8.45318	8.81646	8.8165	8.56918	8.96639	8.47173	8.82839	9.17695	8.56082	9.00198	8.42128	8.83327	9.09567
Stx8_ENSMUST00000021285	4.93931	4.81576	4.94033	4.86257	4.41565	4.98319	4.69699	5.0123	4.71883	4.69935	5.02556	4.64893	4.7932	4.63787	4.60135
Usp43_ENSMUST00000021288	3.19667	3.53097	2.76832	3.33456	3.42038	2.31746	2.59463	3.03721	3.48059	2.95869	2.76354	3.11051	2.45792	2.40476	2.94355
Tmem101_ENSMUST00000021296	5.23313	5.12652	4.97321	5.18514	5.22098	5.02394	5.23236	5.03227	5.10745	5.16781	5.06577	5.12078	5.05956	5.12983	5.11814
Lsm12_ENSMUST00000021297	6.6353	6.44792	6.58767	6.56127	6.48379	6.63018	6.53064	6.59726	6.51115	6.42929	6.51207	6.36925	6.35132	6.38169	6.3564
Eftud2_ENSMUST00000021306	9.17034	9.20027	9.26412	9.24068	9.19383	9.16295	9.14759	9.18919	9.16577	9.13664	9.15265	9.17988	9.0716	9.0971	9.1253
Kif18b_ENSMUST00000021311	6.41378	6.92367	6.7459	6.93572	6.9468	6.39874	6.61882	6.65957	6.8457	6.54263	6.28391	6.55992	6.5958	6.80525	6.51797
Dcakd_ENSMUST00000021313	7.32887	7.35924	7.29676	7.19735	7.2067	7.27673	7.2439	7.35022	7.20896	7.04325	7.1205	7.16197	7.20783	7.00844	7.07643
Nmt1_ENSMUST00000021314	7.75825	7.80468	7.76187	7.84348	7.70554	7.8023	7.89991	7.66517	7.74851	7.77614	7.70187	7.76641	7.81711	7.80983	7.75141
Gosr2_ENSMUST00000021329	4.86977	4.7488	4.73515	4.43782	4.70602	4.74067	4.44733	4.67394	4.59913	4.51039	4.70745	4.45696	4.6537	4.53342	4.59244
Fkbp3_ENSMUST00000021332	8.60753	8.42585	8.66864	8.46491	8.37335	8.73608	8.45056	8.80485	8.47685	8.52426	8.90014	8.56713	8.79777	8.54599	8.55483
Scfd1_ENSMUST00000021335	6.86531	6.96555	6.92675	6.90158	6.70118	7.08589	7.14451	6.91751	6.86262	7.0257	7.25485	7.06249	7.07468	6.94322	6.98922
Ap4s1_ENSMUST00000021338	2.74715	2.47407	1.9278	2.50138	2.57238	2.46684	2.2076	2.68028	2.66724	2.74654	2.37275	3.02562	2.16094	2.22131	2.76485
Dtd2_ENSMUST00000021339	4.27945	4.07004	4.10886	3.73792	3.97677	3.75527	3.86472	4.16027	3.78164	3.96484	3.95771	4.04732	4.28904	4.04603	3.65793
Gtf2a1_ENSMUST00000021345	6.65197	6.58091	6.59825	6.40385	6.50172	6.7757	6.5262	6.56678	6.4994	6.58318	6.86532	6.68744	6.85023	6.74912	6.58685
Sel1l_ENSMUST00000021347	5.90669	5.88443	5.71342	5.68962	5.9943	6.0772	6.21728	5.94279	5.84028	6.08692	6.17781	6.15282	6.18394	6.1282	6.28358
Pole2_ENSMUST00000021359	6.13428	6.26833	6.09959	6.27882	6.07737	6.03396	6.31581	6.26735	6.3038	6.33507	6.19605	6.43656	6.42612	6.40341	6.44811
Klhdc2_ENSMUST00000021362	5.80976	6.0521	6.14359	6.15252	5.89261	5.66796	5.71467	5.83891	6.08009	5.66008	5.53553	5.64182	5.79652	5.93672	5.74288
Nemf_ENSMUST00000021368	7.07912	7.302	7.24721	7.48418	7.38276	6.99861	7.35954	7.15231	7.2399	7.2131	6.84235	7.34098	6.95201	7.24029	7.16919
L2hgdh_ENSMUST00000021370	5.3139	5.70532	5.14899	5.58396	5.67672	5.15449	5.71076	5.58548	5.61918	5.69381	4.98419	5.69318	5.33999	5.48587	5.78648
Sec23a_ENSMUST00000021375	6.52653	6.69201	6.75774	6.60437	6.81673	6.72469	6.89	6.62053	6.73312	6.88518	6.73421	6.8361	6.88496	6.93392	6.92328
Gemin2_ENSMUST00000021379	6.06441	5.89686	5.99539	5.93342	5.95903	6.04983	6.01337	6.02978	6.03195	6.0057	6.11691	6.08102	5.91124	5.92925	5.84014
Trappc6b_ENSMUST00000021380	4.36281	4.13441	4.03292	3.88499	4.27673	4.37531	4.20204	3.96633	4.00865	4.26325	4.19378	4.0616	4.34454	4.31021	4.21705
Pnn_ENSMUST00000021381	7.49166	7.42076	7.58966	7.57955	7.61265	7.74738	7.66552	7.63937	7.45394	7.53489	7.78704	7.6507	7.61755	7.61654	7.71084
Galc_ENSMUST00000021390	3.6918	4.14487	3.62048	4.06406	3.95089	3.43092	3.53396	3.64181	4.18531	3.84988	3.51025	3.89611	4.10847	4.13957	4.04496
Polr2h_ENSMUST00000021405	6.45235	6.36316	6.4831	6.31229	6.29356	6.54032	6.33117	6.42293	6.33939	6.3818	6.45644	6.34901	6.16864	6.19198	6.28081
2700097O09Rik_ENSMUST00000021406	5.35519	5.31421	5.19153	5.34615	5.42273	5.69849	5.69896	5.25253	5.24518	5.44368	5.55685	5.7604	5.70054	5.71153	5.39404
Ppp2r3c_ENSMUST00000021410	5.38541	5.25271	5.19153	5.41379	5.41329	5.70853	5.80912	5.27784	5.24518	5.57013	5.95504	5.68398	5.76297	5.61246	5.6386
Prorp_ENSMUST00000021411	5.2928	5.29087	5.24637	5.25566	5.3894	5.7284	5.60098	5.39814	5.37091	5.84488	5.82048	5.88611	5.47044	5.68518	5.54477
Psma6_ENSMUST00000021412	8.62452	8.76096	8.76686	8.72533	8.72021	8.81658	8.86406	8.7042	8.70504	8.74363	8.83836	8.87327	8.79279	8.82324	8.73658
Nfkbia_ENSMUST00000021413	5.59385	5.71236	5.78925	5.59566	5.4507	5.90897	5.78701	5.5582	5.52571	5.87133	5.87242	5.62749	5.55129	5.41815	5.70207
Mbip_ENSMUST00000021416	5.59385	5.45948	5.52667	5.39606	5.37973	5.70352	5.5711	5.70848	5.65493	5.51249	5.51389	5.42693	5.51143	5.16203	5.37859
Sptlc2_ENSMUST00000021424	6.90929	7.15976	6.77882	7.05633	7.1538	6.96132	7.27865	6.95983	7.17242	7.16581	7.03191	7.16858	6.93704	7.11756	7.15716
Ahsa1_ENSMUST00000021425	8.21677	8.12883	8.22306	8.15614	8.1864	8.32523	8.27038	8.30733	8.19172	8.22115	8.38025	8.34134	8.37428	8.31272	8.34219
Snw1_ENSMUST00000021428	8.02537	7.90572	8.0295	7.8662	7.91411	8.1768	7.92459	8.10301	8.01451	7.96523	8.20789	7.95708	8.13297	7.87831	7.88048
Mthfd1_ENSMUST00000021443	9.77891	9.77038	9.91053	9.82217	9.68152	10.0041	9.9192	9.75972	9.70515	9.86033	10.0591	10.0053	10.0752	9.99922	9.82346
Ppp2r5e_ENSMUST00000021447	5.96788	5.80096	5.86567	5.79484	5.95578	5.94761	5.82367	5.68344	5.72052	5.53748	5.91156	5.67472	6.04008	5.83652	5.81356
Sgpp1_ENSMUST00000021450	3.12685	3.17068	2.73035	3.13526	2.7629	1.5805	2.01813	2.62875	2.69499	2.01906	1.12882	2.50479	2.96239	2.87783	2.03841
Tex21_ENSMUST00000021453	2.13873	2.0084	2.22946	1.98918	1.71758	2.60219	2.52509	2.4621	1.1902	2.56406	2.71379	2.22916	1.42397	1.89326	1.81164
Sptb_ENSMUST00000021458	3.34754	4.01412	3.04069	3.54226	3.32286	2.41875	3.1041	3.71775	3.72894	2.90851	2.43549	2.99618	1.78654	2.60545	2.88641
Atl1_ENSMUST00000021466	2.35774	2.74537	2.17396	2.39829	2.50284	2.20853	2.69303	2.13279	2.85111	2.59612	2.23845	2.73612	2.75957	3.18416	2.36558
Sav1_ENSMUST00000021467	2.74715	2.8513	2.17396	3.42476	3.00848	2.41875	2.97965	3.11418	2.87556	2.93382	2.30716	2.54601	2.52351	2.87783	2.82691
Tmx1_ENSMUST00000021471	6.0105	5.93952	5.98333	5.7077	5.9095	5.52195	5.51839	6.06898	5.75388	5.39439	5.52836	5.51261	5.98294	5.75863	5.42948
Actr10_ENSMUST00000021479	6.69884	6.77848	6.83357	6.9234	6.85386	6.68458	6.75794	6.73765	6.83795	6.66859	6.47148	6.75272	6.69876	6.82952	6.76187
Timm9_ENSMUST00000021486	4.08451	3.95594	4.15259	3.97133	4.00219	4.31089	4.24593	4.19612	3.95229	4.05987	4.17552	4.23547	3.95052	3.97529	3.74087
Rtn1_ENSMUST00000021497	4.99915	4.76922	4.76363	4.56227	4.63466	4.5191	4.50265	4.64829	4.27995	4.42372	4.36471	4.47842	4.8582	4.41013	4.16994
Dhrs7_ENSMUST00000021512	3.44639	3.39745	3.3719	3.33456	3.63059	3.0439	3.1041	3.58886	3.54298	3.41924	2.90327	3.02562	3.79984	3.77329	2.94355
Ppm1a_ENSMUST00000021514	6.06441	6.38537	6.20371	6.42367	6.37852	6.11164	6.43908	6.26313	6.41433	6.41588	5.97101	6.19878	5.9051	6.27088	6.34319
Glrx5_ENSMUST00000021522	5.22758	5.08912	5.19153	5.01554	4.72141	5.32074	4.81094	4.96113	4.79773	4.71404	5.00502	4.82672	5.09235	4.9933	4.91883
Mnat1_ENSMUST00000021523	7.11413	6.8774	6.96199	6.77697	6.74513	7.33295	7.05791	6.96243	6.9137	6.95483	7.26136	6.90703	7.03868	6.86321	6.87819
Hif1a_ENSMUST00000021530	7.79998	7.89802	7.94396	8.09702	7.85342	7.73761	7.85633	7.80086	7.97403	7.72268	7.66144	7.77727	7.81547	7.74328	7.70051
Snapc1_ENSMUST00000021532	3.44639	3.65318	4.00138	3.68049	3.52931	3.61292	3.65284	3.38655	3.60279	3.73938	3.79976	3.57618	3.87714	3.87005	3.3966
Atp6v1d_ENSMUST00000021536	6.4356	6.30841	6.51136	6.32406	6.29098	6.88151	6.64978	6.64667	6.49151	6.5671	6.77723	6.65248	6.56887	6.28557	6.46772
Zfyve26_ENSMUST00000021547	4.40275	5.17833	4.773	4.98622	5.19916	4.49611	5.28063	4.78403	5.18287	5.35745	4.45833	5.08626	4.76636	5.1233	5.0994
Arg2_ENSMUST00000021550	2.27408	2.44052	2.28289	2.24826	2.50284	3.25035	3.44262	2.40198	2.00311	2.80257	2.55332	3.13773	3.71815	3.98972	2.94355
Zfp36l1_ENSMUST00000021552	6.83826	6.7062	6.86676	6.86338	6.64982	6.55986	6.42005	6.55647	6.4994	6.58318	6.60029	6.49298	6.79487	6.81339	6.50854
Actn1_ENSMUST00000021554	8.53189	8.49695	8.49128	8.39299	8.33009	8.75012	8.64287	8.50694	8.48482	8.59835	8.72207	8.70033	8.5645	8.49633	8.58264
Smoc1_ENSMUST00000021564	4.48876	4.35755	4.13816	3.97133	4.58505	4.55291	4.27799	4.59558	4.71883	5.01017	4.79379	4.74056	4.77985	4.58184	5.06118
Pcnx_ENSMUST00000021567	3.81532	3.75222	3.49022	3.81999	4.25574	3.27757	3.4044	3.32312	3.79452	3.98919	3.42006	3.67239	3.57081	3.59605	3.78843
Cdca7l_ENSMUST00000021592	5.31912	5.44264	5.02901	5.29445	5.13165	5.19788	5.29637	5.1466	5.21196	5.20986	5.1049	5.16114	5.09235	5.18729	5.24289
Psmc1_ENSMUST00000021595	8.67483	8.57343	8.61234	8.54301	8.53286	8.74464	8.59542	8.65997	8.52014	8.51223	8.71734	8.6115	8.70893	8.56658	8.57249
Nrde2_ENSMUST00000021596	5.77974	6.19729	5.98333	6.17608	6.14456	6.11164	6.28983	5.96373	6.22511	6.51983	6.04329	6.35482	5.94155	6.24405	6.32717
Trip11_ENSMUST00000021605	5.45354	5.97803	5.61788	5.94261	6.20328	5.34023	5.99741	5.61888	5.95372	5.9228	5.32798	5.96042	5.75617	6.00222	5.96958
Atxn3_ENSMUST00000021606	5.59385	5.24301	5.6022	5.4443	5.38457	5.66281	5.47295	5.50917	5.35361	5.43484	5.52836	5.35916	5.61285	5.53096	5.4144
Lgmn_ENSMUST00000021607	7.0914	7.01625	7.04166	6.97058	7.11208	6.7589	6.78608	7.09887	7.11196	6.87705	6.6639	6.71028	6.89119	6.86907	6.81834
Chga_ENSMUST00000021610	4.12088	3.97949	4.28944	4.01844	4.22368	4.24346	3.98613	4.00726	3.80729	4.34099	4.36471	4.22282	4.39797	4.29867	4.29597
Otub2_ENSMUST00000021620	1.25238	0.554686	1.35952	1.34384	1.52054	1.17996	1.13943	1.09532	1.33829	1.29778	1.63578	1.25425	2.58624	1.83052	1.54245
Ppp4r4_ENSMUST00000021631	1.49339	1.31653	2.47881	1.78636	1.94435	1.74556	1.67709	1.70537	2.17057	1.76075	1.73888	1.35046	1.55521	2.01109	1.98497
Dcaf4_ENSMUST00000021645	4.86977	5.08369	4.97321	5.11643	5.13165	5.07914	5.22141	4.80739	5.03873	5.25072	5.07565	5.36493	5.07057	5.43406	5.42447
Numb_ENSMUST00000021647	4.8337	5.0673	4.95686	5.14855	5.05477	4.5191	4.67308	5.0123	4.96088	4.66953	4.88652	4.74941	5.0032	5.04947	4.66219
Abcd4_ENSMUST00000021666	3.99589	4.47821	3.85026	4.09736	4.1798	3.61292	4.07398	3.92421	4.36876	4.21245	3.77572	3.94316	3.66101	3.9161	3.8791
Isca2_ENSMUST00000021667	3.75488	3.26953	3.66141	3.58982	3.2398	3.43092	3.15102	3.56164	3.64608	2.85651	3.25594	3.08277	3.68986	3.49854	3.02524
Npc2_ENSMUST00000021668	6.79201	6.44369	6.60088	6.52706	6.34165	7.01285	6.65996	6.84033	6.68724	6.91249	6.82488	6.73723	6.80809	6.66846	6.83731
Fcf1_ENSMUST00000021669	7.45176	7.26054	7.42857	7.29744	7.28776	7.65958	7.36078	7.43704	7.29533	7.35804	7.57177	7.33069	7.40561	7.20517	7.23933
Ylpm1_ENSMUST00000021670	7.27475	7.36707	7.3431	7.43619	7.3645	7.32156	7.51783	7.2536	7.35088	7.4365	7.39758	7.48572	7.0692	7.32806	7.57277
Fos_ENSMUST00000021674	1.69984	2.18087	2.61006	2.12453	1.94435	2.76492	2.06788	1.37095	1.91148	2.19685	2.23845	1.52555	1.78654	2.17156	2.03841
Erg28_ENSMUST00000021676	5.68575	5.57222	5.43523	5.35076	5.53585	5.62622	5.19926	5.70848	5.51017	5.49134	5.59857	5.25114	5.48698	5.52106	5.45427
Angel1_ENSMUST00000021682	4.1328	4.26474	3.70121	4.10829	4.51613	3.77451	4.21314	3.85862	4.27995	4.20207	4.2646	4.13098	4.12968	4.25156	4.28496
Evl_ENSMUST00000021689	2.43681	2.37097	2.76832	2.85286	3.03335	2.87595	2.59463	2.91348	2.77516	3.34572	2.66226	3.13773	2.52351	2.90852	2.91526
Yy1_ENSMUST00000021692	7.41195	7.28201	7.455	7.34442	7.34972	7.39331	7.21107	7.3778	7.26557	7.20142	7.5002	7.28425	7.46106	7.34919	7.30486
Amn_ENSMUST00000021707	3.26327	3.191	3.49022	3.23835	3.4939	1.39408	2.41405	3.47675	3.48059	1.81625	1.52475	2.41863	0.938543	1.76493	1.81164
Zfyve21_ENSMUST00000021714	4.87687	4.67137	4.573	4.21326	4.83187	4.70101	4.52063	4.59558	4.29815	4.35042	4.7201	4.48902	4.62411	4.76912	4.49067
Xrcc3_ENSMUST00000021715	3.19667	2.97364	3.07139	3.33456	2.87723	3.45497	3.51615	2.82467	3.03602	2.95869	2.94699	3.26663	2.9143	2.78161	2.99852
Atp5mpl_ENSMUST00000021719	6.19241	6.04375	6.2175	6.05138	6.02872	6.23133	5.9942	6.42293	5.95085	5.91963	6.10248	5.8821	6.24354	5.9771	5.74288
Siva1_ENSMUST00000021728	6.39658	6.28733	6.27797	6.14723	6.24114	6.50621	6.20899	6.35717	6.19628	6.07843	6.39067	6.2558	6.36033	6.23197	6.07883
Ryr2_ENSMUST00000021750	2.68372	3.15007	2.84138	3.35306	3.15167	1.74556	2.41405	3.22243	3.46456	2.80257	1.27321	2.50479	2.45792	2.87783	2.76485
Aoah_ENSMUST00000021757	2.77784	3.01981	2.56762	1.94108	2.04563	4.0518	3.98613	2.68028	2.92326	3.58817	3.64908	3.92765	2.64636	2.52849	3.72466
Mrs2_ENSMUST00000021772	2.43681	2.99691	2.5239	3.19799	2.8212	0.928421	1.85766	2.73003	2.82623	2.49772	1.83509	2.12419	2.52351	2.71371	2.9713
Exoc2_ENSMUST00000021785	6.24554	6.49975	6.46876	6.62164	6.48379	6.25207	6.45085	6.32919	6.58158	6.46228	6.25811	6.65483	6.26767	6.6206	6.47501
Tmem14c_ENSMUST00000021790	6.21502	6.15912	6.24469	5.98474	6.05021	6.00167	5.88046	6.33322	6.06156	5.98768	6.14534	5.96042	6.12177	5.84448	5.91705
Elovl2_ENSMUST00000021793	3.07835	3.28851	2.84138	3.04712	3.12877	2.41875	2.48902	2.51982	2.96943	2.46337	2.66226	2.66305	2.86454	3.28118	2.63209
Tbc1d7_ENSMUST00000021797	4.10886	4.17578	4.12359	4.38487	4.16861	4.27081	4.1336	4.24827	4.38588	4.08268	4.28178	4.37926	4.08694	4.33302	4.0836
Mcur1_ENSMUST00000021800	3.78542	3.90764	3.98535	4.08635	3.63059	3.2226	3.00541	3.92421	3.63179	3.18636	3.18468	3.21645	3.33543	3.61479	3.05147
Cap2_ENSMUST00000021802	3.34754	3.25029	3.77766	2.87862	3.00848	2.02796	2.11597	3.41725	3.03602	1.81625	1.83509	2.01098	2.3892	2.06659	1.92948
Nup153_ENSMUST00000021803	8.61073	8.60879	8.6516	8.73726	8.74772	8.70384	8.72221	8.64546	8.66483	8.60181	8.77912	8.74859	8.75574	8.76833	8.76013
Tpmt_ENSMUST00000021806	4.24691	4.29322	4.50716	4.11914	4.20191	4.24346	4.26738	4.5821	4.31613	4.49347	4.74508	4.59102	4.63898	4.59133	4.15792
Dek_ENSMUST00000021807	8.3201	8.19005	8.22392	8.16009	8.17736	8.48338	8.30255	8.40246	8.20082	8.29015	8.59213	8.37176	8.49364	8.23613	8.23969
Cenpp_ENSMUST00000021818	6.2592	6.23447	6.14719	6.08773	6.09225	6.40184	6.30547	6.1351	6.05889	5.93225	6.3627	6.37498	6.10579	5.81237	6.09468
Nol8_ENSMUST00000021824	7.34434	7.31826	7.45936	7.53062	7.56013	7.37609	7.39895	7.42387	7.45597	7.48867	7.57873	7.39697	7.43786	7.37415	7.35311
Wrnip1_ENSMUST00000021832	5.8751	6.0041	5.95068	5.96082	5.85473	5.69345	5.82729	5.73917	5.92472	5.75898	5.86104	5.86591	5.76975	5.90662	5.89186
Eci2_ENSMUST00000021854	3.78542	4.09182	3.79616	4.00681	3.82832	3.81223	3.77769	4.04706	3.76864	3.69566	3.72639	3.88008	3.66101	3.61479	3.77275
Fars2_ENSMUST00000021857	4.32173	4.46158	3.85026	4.24332	4.20191	4.34988	4.59886	4.24827	4.33389	4.50196	4.24722	4.62989	4.15059	4.89709	4.67912
Ssr1_ENSMUST00000021864	8.33888	8.18119	8.15393	8.01227	8.30669	8.40762	8.15929	8.29499	8.18011	8.20565	8.38919	8.10406	8.3765	8.15205	8.27907
Riok1_ENSMUST00000021866	6.42352	6.55174	6.61397	6.59469	6.68949	6.55986	6.65996	6.48944	6.56852	6.4226	6.42199	6.47442	6.50941	6.58778	6.53434
Sema4d_ENSMUST00000021900	5.91362	6.2073	5.52667	5.84144	6.03181	5.97281	6.25267	5.94279	6.1718	6.33507	5.80868	6.22757	5.6719	6.03737	6.24999
Auh_ENSMUST00000021913	4.10886	3.99113	3.91939	3.57414	4.0395	3.65504	3.44262	4.28202	4.14565	4.01314	3.51025	3.36205	4.08694	3.82248	3.93653
Ror2_ENSMUST00000021918	5.09368	5.22342	4.98131	4.89449	5.18258	4.03595	4.23508	4.97151	4.90258	4.19162	3.99984	3.92765	4.49926	4.81845	4.13357
Sptlc1_ENSMUST00000021920	6.46184	6.68844	6.3918	6.47735	6.584	6.21382	6.67006	6.57361	6.64341	6.67423	6.10731	6.62388	6.60341	6.53465	6.68855
Ptch1_ENSMUST00000021921	4.66332	4.92291	4.4499	4.38487	4.84598	4.89805	5.5581	4.63529	5.14313	5.9005	5.17092	5.4047	4.98002	5.28995	5.86623
Msx2_ENSMUST00000021922	2.8079	2.66048	2.47881	2.28726	1.99588	1.89366	2.25132	1.89178	2.00311	1.76075	2.85818	1.95086	2.52351	2.8144	1.87176
Habp4_ENSMUST00000021929	1.76258	1.96186	2.11624	1.8398	1.52054	1.17996	2.06788	2.13279	2.24753	2.59612	1.73888	1.68167	1.98585	1.83052	2.18779
Sfxn1_ENSMUST00000021930	6.02017	5.90611	5.97929	5.93342	6.01941	5.95606	5.89432	6.02978	6.13176	6.14225	6.12169	5.9257	6.06783	6.09188	6.30281
Zfp346_ENSMUST00000021937	3.62584	3.57802	3.75892	3.60533	3.54669	3.67565	3.46136	3.5056	3.41537	3.36445	3.62236	3.69089	3.3715	3.23348	3.15187
Lman2_ENSMUST00000021940	6.99017	7.10994	6.77183	6.86176	6.99825	6.94231	7.02994	6.8261	6.77921	7.06346	6.96171	7.01373	7.00176	7.00489	7.14199
Mxd3_ENSMUST00000021941	2.09063	1.86401	2.11624	1.89133	2.50284	2.80289	1.91316	2.4621	2.39013	2.06561	2.71379	2.41863	2.64636	2.64245	2.18779
Prelid1_ENSMUST00000021942	6.29942	6.33832	6.27467	6.34961	6.62549	6.35788	6.51279	6.26313	6.33279	6.67798	6.32591	6.41447	6.28195	6.4485	6.51326
Ddx41_ENSMUST00000021956	5.75681	5.95445	5.8076	5.88021	5.8301	5.79585	5.81277	5.67076	5.83093	5.93539	5.65897	5.87807	5.84864	5.94785	6.06602
Fam193b_ENSMUST00000021957	4.49801	4.28379	4.32808	4.14059	4.28711	4.44899	4.59886	4.21371	4.1755	4.59215	4.47335	4.45696	4.38038	4.20285	4.36034
Txndc15_ENSMUST00000021959	4.70384	4.37542	4.56223	4.47207	4.52493	4.64985	4.68906	4.37877	4.38588	4.50196	4.62909	4.11737	4.6537	4.59133	4.57447
Caml_ENSMUST00000021963	4.5072	4.4105	4.48453	4.43782	4.33791	4.53046	4.55592	4.66117	4.23341	4.74296	5.03572	4.47842	4.77985	4.42082	4.58348
Ptdss1_ENSMUST00000021990	4.85545	5.16812	4.81895	5.01554	5.26365	5.00778	5.30677	4.66117	5.05488	5.20986	4.85244	4.97747	4.90817	5.30733	5.04169
Mterf3_ENSMUST00000021991	5.54561	5.64399	5.64364	5.66762	5.43211	5.69849	5.68707	5.68344	5.6514	5.43927	5.90049	5.60815	5.65736	5.91798	5.53085
Uqcrb_ENSMUST00000021993	7.5112	7.33319	7.62372	7.45451	7.31337	7.7054	7.42304	7.6164	7.31669	7.32494	7.63995	7.43587	7.72252	7.42944	7.37534
Cetn3_ENSMUST00000022009	6.43801	6.21971	6.4973	6.26423	6.28063	6.73945	6.63748	6.4822	6.29476	6.45356	6.70586	6.49298	6.62598	6.49222	6.42823
Ccnh_ENSMUST00000022030	6.86888	6.9038	6.89493	6.7923	6.83453	6.85916	6.80637	6.90673	6.95157	6.69658	6.73108	6.83402	6.79154	6.73848	6.78159
2210016F16Rik_ENSMUST00000022032	5.19383	5.29087	5.06759	5.24579	5.10257	4.86253	4.98937	4.89724	5.14313	4.8532	4.7201	4.82672	4.87086	4.76073	4.78453
Naa35_ENSMUST00000022038	7.24896	7.11792	7.15885	7.10078	7.21895	7.40724	7.42781	7.20164	7.21136	7.44643	7.40348	7.429	7.37262	7.41348	7.47319
Golm1_ENSMUST00000022039	6.62056	6.39416	6.48025	6.31936	6.50395	6.43848	6.23099	6.62053	6.40596	6.29168	6.35054	6.14614	6.81465	6.76598	6.34849
Agtpbp1_ENSMUST00000022040	3.21922	3.15007	2.87657	3.04712	3.21827	3.27757	3.99902	2.91348	3.29363	3.71038	3.03064	3.61544	3.57081	3.75652	3.67491
Nkd2_ENSMUST00000022051	1.93591	2.09721	2.43227	2.71665	2.63872	1.29099	1.39469	2.77813	2.58066	1.44588	1.27321	1.52555	1.67551	0.862228	1.30145
Trip13_ENSMUST00000022053	6.77118	6.70267	6.78346	6.76321	6.80233	6.60354	6.63748	6.69131	6.72137	6.61678	6.64411	6.51391	6.58432	6.5469	6.62883
Pdcd6_ENSMUST00000022060	6.02657	5.83364	5.92149	5.79822	5.80504	6.23828	5.98452	6.03968	5.92179	5.90371	6.07811	6.07399	5.82282	5.76703	5.8991
Sdha_ENSMUST00000022062	8.99283	9.36526	9.07258	9.23134	9.28371	8.89228	9.26455	9.10507	9.2735	9.14649	8.93855	9.25366	9.03833	9.23178	9.38424
Ccdc127_ENSMUST00000022063	5.24416	5.04514	5.17749	5.11101	5.09668	5.09452	4.83269	4.95068	4.99476	5.02202	5.00502	4.70461	4.90817	4.9933	4.95402
Pcsk1_ENSMUST00000022075	2.09063	2.92594	1.99339	1.78636	2.73284	1.4903	1.85766	2.82467	2.48854	1.97097	1.83509	1.68167	1.55521	1.54812	1.81164
Rhobtb3_ENSMUST00000022078	4.32173	4.70708	4.59429	4.80327	4.82477	4.14343	4.20204	4.74826	4.94941	4.49347	4.24722	4.19717	4.02034	4.43142	4.28496
Glrx_ENSMUST00000022082	3.6918	3.32574	3.55682	3.00095	3.30254	3.47862	3.28327	3.38655	3.18041	3.84988	3.77572	3.4943	2.81301	3.32735	3.29048
Med10_ENSMUST00000022089	5.30865	5.26714	5.13453	5.19543	4.89431	5.34023	5.13652	5.1466	4.81679	4.46771	5.20733	5.09323	5.03728	4.87394	4.67912
Ndufs6_ENSMUST00000022097	7.02897	6.84571	6.87549	6.82248	6.8451	7.03096	6.94263	6.97022	6.82545	6.751	7.16976	6.90505	7.04428	6.91893	6.73986
Lpcat1_ENSMUST00000022099	6.77118	6.96408	6.49447	6.705	6.87637	6.29599	6.32862	6.68502	6.95587	6.60107	6.09279	6.39486	6.25806	6.51733	6.50854
Clptm1l_ENSMUST00000022102	4.89098	5.00554	4.78231	5.13258	5.27933	4.95817	5.12481	4.85301	4.95516	5.19424	4.91982	5.00729	4.94454	4.92738	5.25423
Tert_ENSMUST00000022104	2.8662	3.75222	3.68144	3.84634	3.79961	3.01184	3.12775	3.5056	3.89363	3.57214	2.71379	3.42969	3.05402	3.57707	3.35508
Xrcc4_ENSMUST00000022115	3.57431	3.46575	3.59957	3.55829	3.6142	3.84899	3.34511	3.76625	3.52764	3.66576	3.75126	3.84748	3.26047	3.51858	3.67491
Atg10_ENSMUST00000022119	1.16218	2.0084	1.63082	2.16696	1.11718	0.784031	1.54279	1.89178	1.33829	1.64292	1.52475	1.25425	1.55521	1.54812	1.68332
Zcchc9_ENSMUST00000022121	4.63844	4.09182	4.58368	4.49723	4.38699	4.41262	4.36016	4.315	4.08403	4.3315	4.42779	4.22282	4.48286	4.15245	4.28496
Ak6_ENSMUST00000022135	5.31912	4.94102	5.54319	5.40495	5.17142	5.2742	4.98937	5.28618	5.06023	4.87949	5.11452	5.10707	5.41967	5.24856	5.04169
Rad17_ENSMUST00000022136	5.11788	5.4926	5.23285	5.61111	5.57026	5.14713	5.44026	4.8753	5.58251	5.35745	5.1049	5.32404	5.34907	5.42347	5.37859
Marveld2_ENSMUST00000022137	3.98278	4.34854	3.91939	3.99508	3.84247	3.25035	3.34511	4.60894	4.31613	3.52296	3.59514	3.61544	3.68986	4.07338	3.58797
Smn1_ENSMUST00000022147	7.04009	6.76668	6.79271	6.65928	6.6458	7.10121	6.89518	6.81462	6.68378	6.59909	7.03698	6.85057	6.86612	6.57826	6.63318
Mccc2_ENSMUST00000022148	5.03771	5.52898	4.94033	5.22083	5.55745	5.46388	5.78329	5.29447	5.57133	5.80772	5.30296	5.90604	5.3848	5.62638	5.88823
Ptcd2_ENSMUST00000022153	5.80231	6.09856	5.90028	6.06547	5.96873	5.70853	5.81641	5.91617	6.17427	5.83484	5.94968	6.07046	5.88652	5.95522	5.92416
Btf3_ENSMUST00000022163	9.06227	8.87446	9.20262	8.95912	8.91474	9.30615	9.02227	9.33548	8.905	8.96542	9.4203	9.13203	9.29345	9.04797	9.00587
Ankra2_ENSMUST00000022164	2.71578	2.57028	2.56762	2.9288	2.14027	2.20853	2.59463	2.82467	2.80092	2.88274	2.60882	2.73612	2.52351	2.60545	2.27942
Hexb_ENSMUST00000022169	7.825	8.09553	7.54934	7.76364	7.94558	7.98783	8.26038	7.86906	8.1097	8.62724	8.01082	8.34208	8.24415	8.37724	8.55081
Polk_ENSMUST00000022172	3.02817	3.51494	3.75892	3.84634	3.72523	3.67565	3.73213	3.18724	3.71545	3.45465	3.53911	3.42969	3.92647	3.70499	3.45673
Hmgcr_ENSMUST00000022176	8.94418	9.26489	9.02289	9.19399	9.3811	8.70509	9.10167	9.27129	9.44618	9.4311	8.92016	9.30597	9.25776	9.43653	9.38811
F2rl1_ENSMUST00000022185	7.53048	7.48182	7.57902	7.57463	7.43036	6.91006	6.89173	7.4163	7.42005	7.00047	6.94564	6.92472	7.2301	7.14843	6.82215
Aggf1_ENSMUST00000022189	4.95282	5.07278	5.27302	5.1001	5.2478	5.01588	5.30158	5.09056	5.20233	5.18372	4.98419	5.22599	4.9204	5.09689	5.08042
Ap3b1_ENSMUST00000022196	7.41805	7.9248	7.6263	7.93457	7.73521	7.47053	7.95218	7.62957	7.83756	7.97745	7.57351	8.00128	7.47563	7.841	7.94574
Scamp1_ENSMUST00000022197	5.68169	5.43414	5.40542	5.22586	5.44608	5.46388	5.35265	5.63855	5.55249	5.30991	5.38472	5.25735	5.72165	5.45501	5.45427
Dimt1_ENSMUST00000022203	6.93676	6.86638	7.0436	6.98548	6.86256	6.83874	6.8479	6.93353	6.8457	6.86394	6.83945	6.82776	6.79818	6.86321	6.83543
Kif2a_ENSMUST00000022204	7.05583	6.9904	6.99239	6.99581	6.94517	7.27166	7.2439	7.0965	7.13112	7.13204	7.24394	7.29789	6.92799	6.97257	7.19295
Elovl7_ENSMUST00000022207	4.12088	3.72461	3.66141	3.57414	3.58084	3.71601	3.61986	4.0273	3.88161	3.88923	3.95771	3.83089	4.19152	3.98972	3.80395
Plk2_ENSMUST00000022212	4.99262	5.09452	5.66393	5.7041	5.39421	5.97281	6.22278	5.49485	5.49052	5.38065	5.67206	5.69776	5.71465	5.66734	5.35772
Zfyve16_ENSMUST00000022217	5.46773	5.57609	5.59165	5.6034	5.68459	5.15449	5.15965	5.48764	5.53341	4.96177	5.09522	5.15449	5.34907	5.52602	5.14884
Dhfr_ENSMUST00000022218	6.66229	6.56543	6.70243	6.59663	6.52603	6.77331	6.69798	6.83749	6.67684	6.751	6.83655	6.77456	6.85661	6.67517	6.74188
Trappc13_ENSMUST00000022224	6.60138	6.52598	6.55546	6.50449	6.61523	6.89256	6.79902	6.6106	6.62189	6.74207	6.96171	6.84438	6.80809	6.85141	6.71341
Trim23_ENSMUST00000022225	5.86798	5.70532	5.67895	5.7744	5.75731	5.56124	5.67508	5.80449	5.67945	5.67891	5.90049	5.78644	5.77649	5.91421	5.54937
Ppwd1_ENSMUST00000022226	7.00646	7.08708	7.16242	7.20882	7.1077	7.00065	7.19016	7.05318	7.19324	6.99897	7.02173	7.28729	7.04707	7.04861	6.99092
Cenpk_ENSMUST00000022227	5.45354	5.21848	5.21921	5.24579	4.92786	5.29433	4.92333	5.42104	5.26845	4.94941	5.26891	5.25114	4.95647	5.12983	5.0086
Cwc27_ENSMUST00000022228	6.59923	6.36986	6.37652	6.37019	6.29613	6.59545	6.39834	6.56678	6.42057	6.40687	6.43357	5.98685	6.42612	6.21057	6.25282
Srek1ip1_ENSMUST00000022230	2.71578	2.60098	2.43227	2.6283	2.46677	2.36899	2.56027	3.03721	2.58066	1.70304	2.37275	2.41863	2.96239	2.12003	2.76485
Emb_ENSMUST00000022242	8.35551	8.12487	7.72734	7.60485	8.00337	8.51731	8.26971	8.34075	8.21286	8.39125	8.63453	8.32589	8.13822	7.99464	8.54794
Mrps30_ENSMUST00000022245	7.06675	7.36148	6.96199	7.19479	7.30062	6.94231	7.42304	7.07501	7.31892	7.27506	7.02428	7.42624	6.93403	7.29504	7.33454
Psmd6_ENSMUST00000022256	8.30174	8.07722	8.21191	8.06862	8.04678	8.40145	8.22175	8.25625	8.04245	8.09711	8.42345	8.20965	8.15383	8.09731	8.08002
Ptprg_ENSMUST00000022264	5.55006	5.79101	5.41741	5.64903	5.92288	5.4218	5.6094	5.44358	5.90704	5.78007	5.43164	5.81201	5.63528	5.71153	5.9488
Pdhb_ENSMUST00000022268	7.94397	8.11427	8.21277	8.20342	8.17596	8.21778	8.31548	8.21098	8.23901	8.27413	8.16456	8.3501	8.30019	8.327	8.3659
Kctd6_ENSMUST00000022272	3.02817	2.60098	3.00933	3.21831	2.73284	2.97905	3.00541	2.73003	3.39859	3.07701	3.14768	2.80566	2.86454	2.96802	3.17592
Mtrex_ENSMUST00000022281	8.85657	8.92878	8.8909	8.8563	8.82721	9.1133	9.16019	8.86594	8.85937	9.02772	9.08822	9.1766	9.03482	9.04451	9.09724
Gpx8_ENSMUST00000022282	2.8662	2.71762	2.47881	2.74494	1.99588	1.66539	2.06788	2.62875	2.45648	2.42818	2.43549	1.35046	2.3892	2.56749	1.87176
Ndufs4_ENSMUST00000022286	7.18598	7.10593	7.14809	7.11575	7.11646	7.15724	7.2439	7.21699	7.17734	7.01536	7.13238	7.16031	7.11779	7.05205	7.00441
Vdac2_ENSMUST00000022293	8.70559	8.87799	8.83888	8.90413	8.88515	8.74647	8.83427	8.8421	8.88104	8.7959	8.71181	8.86005	8.81342	8.83577	8.81762
Ube2e1_ENSMUST00000022296	5.76066	5.67318	5.61788	5.5362	5.74607	5.81919	5.5925	5.75127	5.76046	5.66764	5.90604	5.76913	5.59771	5.63099	5.6386
Ngly1_ENSMUST00000022310	3.80045	3.76583	3.88524	3.91019	3.42038	3.01184	3.28327	3.41725	3.64608	2.88274	3.07072	2.83921	3.50739	3.39395	3.07723
Oxsm_ENSMUST00000022311	3.07835	3.49873	2.91093	3.19799	3.36266	2.26402	2.72439	2.68028	3.34706	3.07701	2.66226	2.66305	3.1814	3.41548	2.88641
Glud1_ENSMUST00000022322	9.12219	9.40494	9.36785	9.44309	9.44911	9.05057	9.32014	9.28696	9.39899	9.3364	9.02077	9.30785	9.16383	9.3332	9.31217
Cdhr1_ENSMUST00000022337	2.54784	2.40616	1.25642	1.73087	1.71758	3.01184	3.00541	2.57531	2.48854	3.58817	3.45075	3.05448	3.05402	2.8144	3.78843
Nid2_ENSMUST00000022340	10.2562	10.3437	10.0836	10.0892	10.3635	10.399	10.4168	10.3333	10.3189	10.6251	10.3552	10.4199	10.3276	10.3133	10.6874
Rtraf_ENSMUST00000022341	8.26496	8.08675	8.2833	8.18159	8.0852	8.47605	8.24086	8.33874	8.07581	8.16013	8.45596	8.23744	8.36983	8.11387	8.09744
Ecd_ENSMUST00000022344	7.14389	7.13769	7.07044	7.15581	7.14954	7.14251	7.13579	7.08937	7.17488	7.1497	7.07934	7.12674	7.03587	7.20826	7.25211
Dnajc9_ENSMUST00000022345	6.3047	6.01269	6.16865	6.2495	6.05021	6.32889	6.28195	6.2246	6.08009	5.88112	6.39857	6.11566	6.42612	6.15725	5.88459
Usp54_ENSMUST00000022356	4.61313	5.36428	4.54045	5.1591	5.30509	4.85352	5.5754	4.64829	5.26383	5.39439	4.86389	5.43793	4.62411	5.21825	5.78648
Zswim8_ENSMUST00000022358	4.66332	5.06179	5.17749	5.51582	5.23177	4.54173	5.07702	4.92954	5.15816	4.90531	4.31553	5.18743	4.80644	5.07676	5.14275
Vcl_ENSMUST00000022369	9.37085	9.17753	9.11831	8.94661	8.98934	9.32788	9.09756	9.21562	9.11661	9.18521	9.3334	9.07156	9.1333	8.97823	9.08301
Txndc16_ENSMUST00000022377	3.1505	2.97364	2.80532	3.02422	2.93117	3.35628	3.26205	3.22243	2.87556	3.91488	3.14768	3.11051	3.82607	3.55783	3.43696
Ero1l_ENSMUST00000022378	6.31259	6.22465	6.06568	5.9578	6.65584	6.35788	6.33117	6.44171	6.38269	6.67235	6.53015	6.57742	6.55717	6.4589	6.7031
Psmc6_ENSMUST00000022380	8.77428	8.59884	8.80902	8.56846	8.5448	8.88179	8.71442	8.80195	8.54799	8.60624	8.96072	8.74416	8.94641	8.68712	8.65178
Anxa11_ENSMUST00000022416	7.98401	7.85886	8.13771	7.99471	7.86039	7.99912	7.6955	8.06595	7.92069	7.89206	7.97959	7.8262	7.84784	7.7454	7.82453
Ppif_ENSMUST00000022419	6.21502	5.96334	6.16153	6.13392	6.13309	6.18176	5.85235	6.24185	6.00727	6.01462	6.20057	5.93736	6.02883	5.99866	5.99007
Rnase4_ENSMUST00000022428	2.13873	2.47407	2.17396	2.20819	2.04563	1.96237	1.96659	2.82467	2.63895	2.56406	2.30716	1.68167	1.78654	2.31595	2.23433
Arf4_ENSMUST00000022429	7.13799	7.23141	7.24384	7.22899	7.2284	7.36662	7.252	7.17943	7.22451	7.23617	7.24831	7.24567	7.3434	7.42015	7.37014
Eaf1_ENSMUST00000022446	5.60673	5.6403	5.64364	5.67131	5.5745	5.68331	5.49585	5.63202	5.56758	5.60206	5.57786	5.38779	5.7832	5.62638	5.6558
Tasor_ENSMUST00000022450	7.31455	7.64997	7.30324	7.63917	7.54831	7.60017	8.08043	7.29344	7.64118	7.97135	7.56652	8.03967	7.50434	7.91845	8.06401
Capn7_ENSMUST00000022451	5.37038	5.6403	5.38112	5.81833	5.63263	5.21206	5.63851	5.36703	5.67945	5.52504	5.37675	5.60328	5.34907	5.74593	5.69376
Bap1_ENSMUST00000022458	4.81161	5.30957	4.76363	5.28485	5.27933	4.76011	4.9829	4.63529	5.24049	4.79913	4.6818	5.1809	4.51547	5.16839	5.17293
Dph3_ENSMUST00000022461	3.36786	3.432	3.3719	3.45932	3.72523	3.33052	3.17392	3.29033	3.6881	3.16514	3.48081	3.45155	3.44104	3.10685	3.24574
Oxnad1_ENSMUST00000022462	4.38291	4.4105	4.32808	4.4805	4.73663	4.54173	4.72827	4.36309	4.52377	4.60796	4.24722	4.7227	4.28904	4.51359	4.71238
Parg_ENSMUST00000022470	6.69884	6.8231	6.72191	6.87622	6.79689	6.76852	6.96741	6.58041	6.83327	6.77745	6.59342	6.93057	6.80149	6.97801	6.95836
Ogdhl_ENSMUST00000022480	7.7906	8.2421	7.98182	8.21673	8.14776	7.74373	8.15786	8.06837	8.3052	8.16815	7.73499	8.1432	7.78403	7.9703	8.34086
Ebpl_ENSMUST00000022494	4.82637	4.78935	4.87222	4.69869	4.86689	4.94973	4.67308	4.96113	4.7784	4.67704	4.65568	4.61059	5.03728	4.82651	4.81547
Kpna3_ENSMUST00000022496	8.08872	7.91338	8.08884	8.03106	7.95293	8.13369	8.009	8.0611	7.97262	7.97288	8.23239	8.01878	8.09302	7.96939	8.04046
Spryd7_ENSMUST00000022497	3.52087	3.54682	3.73994	3.81999	3.78504	3.45497	3.47986	3.5056	3.48059	3.58817	3.18468	3.42969	3.3715	3.30445	3.22284
Rnaseh2b_ENSMUST00000022499	6.25102	6.36763	6.32967	6.33107	6.2142	6.55708	6.46717	6.41154	6.33499	6.57717	6.63745	6.51391	6.58432	6.53465	6.4604
Mapk8_ENSMUST00000022504	5.30339	5.26714	5.38723	5.43565	5.44608	4.9749	5.05251	5.36703	5.39648	5.11899	4.78176	5.03651	5.13494	5.0835	5.10568
Pspc1_ENSMUST00000022507	7.54058	7.43254	7.54251	7.53873	7.37548	7.78581	7.67959	7.7877	7.62595	7.61042	7.70665	7.66012	7.55619	7.35617	7.5326
Zmym2_ENSMUST00000022511	7.57813	7.61656	7.66958	7.65789	7.63415	7.62555	7.65843	7.81101	7.81719	7.65009	7.49653	7.69146	7.65096	7.61654	7.6922
Cryl1_ENSMUST00000022517	4.09673	4.09182	4.19502	4.08635	4.02717	3.30429	3.56894	4.0273	4.15567	3.288	3.75126	3.24176	3.4746	3.53834	3.33387
Eef1akmt1_ENSMUST00000022518	4.84098	4.68576	5.02117	4.63209	4.56813	4.88925	4.75888	4.8642	4.93203	4.84655	4.96305	5.03651	4.36257	4.57229	4.94005
Tdh_ENSMUST00000022522	9.54742	9.6699	9.53925	9.48405	9.47431	9.8869	9.94335	9.57169	9.50443	9.86404	9.82945	9.91234	9.78382	9.79694	9.98082
Pinx1_ENSMUST00000022528	5.57649	5.60666	5.5322	5.52401	5.32033	5.8099	5.5797	5.41344	5.39225	5.51669	5.76048	5.5074	5.35808	5.23045	5.35245
Tkt_ENSMUST00000022529	9.86139	10.0634	9.96058	9.99241	10.1019	9.80274	9.91517	10.0886	10.1001	10.1278	9.93533	10.1042	9.90529	9.93474	10.1554
Dcp1a_ENSMUST00000022535	6.09216	6.1252	6.40692	6.39718	6.12733	6.08107	5.93175	6.26735	6.34816	6.02644	5.99724	6.0347	6.20408	6.25604	5.91705
Ska3_ENSMUST00000022536	6.85275	6.78183	6.99439	6.82414	6.84335	6.89914	6.78049	6.7796	6.73145	6.67798	7.06949	6.86489	7.19782	6.94507	6.7031
Mrpl57_ENSMUST00000022538	5.12983	5.03394	5.11256	5.02711	5.17142	5.40955	5.05868	5.00221	4.89662	5.11347	5.2775	5.11394	5.46211	5.32451	4.94005
Micu2_ENSMUST00000022543	5.36534	5.43839	5.49871	5.41819	5.32538	5.20499	5.22689	5.4361	5.26383	5.18899	5.4621	5.34171	5.10312	4.8817	5.02854
Hmbox1_ENSMUST00000022544	4.19098	4.01412	4.15259	4.1512	4.13453	4.0518	3.96002	4.00726	3.92911	4.13818	3.97893	3.83089	3.82607	4.12657	4.00525
Extl3_ENSMUST00000022550	4.30075	4.66412	4.00138	4.62449	4.47133	3.65504	4.59038	4.06656	4.51602	4.806	4.06081	4.71368	4.27006	4.92738	4.62774
Cab39l_ENSMUST00000022553	3.55672	3.39745	3.53496	3.49307	3.59762	2.94549	3.1041	3.25678	3.23813	3.48921	3.51025	3.42969	2.86454	3.08013	2.82691
Mtmr6_ENSMUST00000022563	3.24141	3.49873	3.70121	3.60533	3.93777	3.38159	3.70093	3.53389	3.89363	4.09395	3.14768	3.84748	3.50739	3.80627	3.7569
Esd_ENSMUST00000022573	6.6499	6.64123	6.69259	6.63681	6.65984	6.52052	6.65996	6.57361	6.71121	6.55083	6.73108	6.63108	6.73383	6.7342	6.53434
Zc3h13_ENSMUST00000022577	7.17737	6.9267	7.07802	6.97208	7.09446	7.34265	7.24526	7.24934	6.98847	7.30204	7.37775	7.22043	7.41428	7.40004	7.36623
Slc25a30_ENSMUST00000022580	2.83735	2.94999	3.07139	3.00095	3.03335	2.36899	2.45202	2.91348	3.03602	2.68824	2.37275	2.58609	2.64636	2.71371	2.85697
Gpalpp1_ENSMUST00000022585	5.03771	5.14747	5.04457	5.04996	4.94762	5.14713	5.22141	5.06171	5.01692	5.07417	5.38472	4.94701	5.23622	5.14924	4.96786
Nufip1_ENSMUST00000022586	7.6913	7.4694	7.67083	7.51017	7.41032	7.72778	7.48845	7.51184	7.39596	7.33803	7.78252	7.54411	7.70496	7.586	7.42259
Tsc22d1_ENSMUST00000022587	6.35901	6.26594	6.57434	6.58494	6.4121	6.53187	6.35641	6.4039	6.34159	6.40913	6.60371	6.37498	6.63713	6.38169	6.35903
Enox1_ENSMUST00000022589	6.88306	6.78016	6.65762	6.5291	6.6111	7.33781	7.12114	6.82324	6.64874	6.93303	7.23073	7.00637	6.56108	6.58303	7.06843
Tnfsf11_ENSMUST00000022592	1.88041	1.96186	1.0251	1.61303	1.58925	1.4903	2.2076	1.60228	1.70866	1.81625	1.92529	2.17763	2.3892	2.01109	1.92948
Naa16_ENSMUST00000022597	6.07681	6.39635	6.14719	6.29804	6.37609	5.88262	6.22552	6.27993	6.53629	6.30386	6.03318	6.43381	6.04567	6.13471	6.22716
Mtrf1_ENSMUST00000022600	2.61738	3.191	2.84138	2.9773	3.40139	2.83988	2.75509	2.51982	2.99197	3.05411	2.94699	3.36205	3.22148	3.51858	3.35508
Wbp4_ENSMUST00000022601	5.94777	5.70178	5.95481	5.80831	5.85124	5.86926	5.71076	6.06898	5.67945	5.55389	5.90604	5.67936	5.88028	5.73741	5.56311
Pbk_ENSMUST00000022612	6.49685	6.40072	6.51416	6.57513	6.57132	5.86478	5.99098	6.56335	6.76292	5.9101	5.85531	5.9296	6.02883	6.1085	5.73481
Esco2_ENSMUST00000022613	7.88262	8.18563	8.11946	8.30072	8.1499	8.13741	8.42692	8.21426	8.40465	8.33596	8.18867	8.4694	8.3211	8.42779	8.27072
Ccdc25_ENSMUST00000022614	5.86441	6.00697	6.13271	6.1042	6.05325	6.08107	6.04166	6.17157	6.06688	5.96331	5.84956	6.09844	5.80314	6.09855	5.9099
Clu_ENSMUST00000022616	5.6447	5.49669	5.52667	5.4443	5.57026	4.88925	4.84701	5.5719	5.52184	4.98617	4.74508	4.49955	4.7932	4.72668	4.68751
Trim35_ENSMUST00000022623	5.63635	5.68397	5.63339	5.57611	5.44144	5.73823	5.54937	5.46578	5.43812	5.29534	5.59857	5.66539	5.61285	5.8245	5.26548
Dpysl2_ENSMUST00000022629	5.47243	5.50888	5.6022	5.4784	5.43211	5.49321	5.43079	5.44358	5.68291	5.40348	5.4621	5.47575	5.65004	5.55055	5.28772
Bnip3l_ENSMUST00000022634	6.54895	6.43094	6.45428	6.2764	6.47246	6.59274	6.35641	6.62053	6.38269	6.45574	6.65733	6.36061	6.28668	6.06147	6.32449
Nefl_ENSMUST00000022639	5.03136	5.44687	4.81895	5.1591	5.27933	4.86253	5.38245	5.03227	5.52184	5.07985	4.70745	5.28196	4.27006	4.78575	5.4738
Pibf1_ENSMUST00000022650	5.05661	4.86717	4.96506	5.17997	5.00534	4.78877	4.85412	5.19169	4.96088	4.79913	5.17092	5.24489	5.02601	5.1233	4.63643
Bora_ENSMUST00000022656	6.07372	6.2073	6.37959	6.38149	6.31907	6.12669	6.01971	6.32515	6.20836	6.04107	6.04832	6.12589	6.27721	6.31738	6.11036
Loxl2_ENSMUST00000022660	5.89274	6.21476	5.44698	5.64903	6.83453	5.02394	5.42603	5.98438	6.32393	5.52504	5.49928	5.70233	5.17631	5.46537	5.50261
Tnfrsf10b_ENSMUST00000022663	5.83552	5.68038	5.99539	5.82497	6.08036	5.94337	5.94512	6.15345	5.93348	5.75544	5.67856	5.72942	5.91735	5.78368	5.77078
Rhobtb2_ENSMUST00000022665	2.35774	3.36204	2.76832	3.31583	3.56387	2.36899	3.4044	2.73003	3.48059	3.14361	1.63578	2.872	2.64636	3.15885	2.94355
Bin3_ENSMUST00000022680	3.81532	3.49873	3.07139	3.77954	3.3429	3.73578	3.53396	3.96633	3.81995	3.90211	3.91432	3.57618	3.63157	3.30445	3.62337
Sorbs3_ENSMUST00000022682	3.10281	3.32574	3.64109	3.40717	3.38216	2.36899	2.06788	3.29033	3.31166	2.23807	1.52475	2.06869	2.16094	2.90852	1.46651
Fam160b2_ENSMUST00000022690	4.14463	4.03675	3.88524	4.2532	4.15734	3.61292	3.61986	3.94542	4.18531	3.73938	3.99984	3.31513	3.4746	3.75652	3.86438
Bmp1_ENSMUST00000022693	3.19667	3.48234	3.21578	3.52605	3.12877	1.29099	1.47064	3.47675	3.49644	1.97097	0.96836	1.68167	1.98585	1.76493	1.81164
Xpo7_ENSMUST00000022696	7.39348	7.56007	7.33205	7.53873	7.4719	7.41492	7.5941	7.2663	7.58112	7.58068	7.47615	7.50675	7.15448	7.38101	7.61075
Fgf17_ENSMUST00000022697	4.27945	4.29322	3.51276	3.25811	4.26628	5.00778	5.06482	4.0273	4.18531	4.84655	5.0458	4.87605	4.5939	4.59133	5.42447
Rb1_ENSMUST00000022701	4.23589	4.33033	4.42635	4.53012	4.22368	4.27081	4.64876	4.43985	4.60645	4.47634	4.62909	4.74056	4.69699	4.75229	4.1088
Itm2b_ENSMUST00000022704	7.25307	7.06936	7.02608	6.86176	7.04792	6.98422	6.8479	7.12235	6.94147	6.87868	7.05707	6.87301	7.09909	6.88073	6.81834
Med4_ENSMUST00000022705	6.0891	5.6623	6.14359	5.88975	5.82655	6.02996	5.87349	6.02978	5.95085	5.69751	6.09764	5.82881	6.01179	5.85634	5.71443
Spry2_ENSMUST00000022709	6.1461	5.99546	6.26806	6.24703	6.08334	5.68331	5.50491	6.02481	5.97933	5.60993	5.71695	5.61785	5.74933	5.97348	5.73076
Rnf219_ENSMUST00000022716	4.61313	4.71412	5.10516	5.1001	4.81045	4.14343	4.35014	4.55475	4.53916	3.78181	3.64908	4.0616	4.69699	4.43142	4.3392
Fbxl3_ENSMUST00000022720	4.42231	4.60477	4.7542	4.79653	4.55101	4.15816	4.6073	4.62218	4.50822	4.21245	4.44314	4.51001	4.30778	4.35547	4.21705
Cln5_ENSMUST00000022721	5.38042	4.94102	5.01329	4.87542	4.72141	5.03196	4.95672	5.34325	5.04952	5.04543	5.18924	5.00729	5.1138	4.81034	4.98837
Tgds_ENSMUST00000022727	2.74715	3.36204	3.46732	3.49307	3.38216	2.72593	3.26205	3.11418	3.27536	3.2482	2.85818	2.96612	3.3715	3.34989	3.24574
Gpr180_ENSMUST00000022728	3.6592	3.81903	3.34702	3.21831	3.4939	3.19431	3.32479	3.25678	3.61737	3.53954	2.85818	3.21645	3.50739	3.82248	3.3966
Dnajc3_ENSMUST00000022734	5.86083	6.00123	5.4702	5.43565	5.71181	6.00575	5.96823	5.68344	5.74727	5.84154	5.88933	5.86183	5.89274	5.92925	6.19516
Rab2b_ENSMUST00000022765	3.26327	3.44898	3.46732	3.66577	3.54669	3.81223	3.87872	3.5056	3.88161	3.65057	3.75126	3.61544	3.90202	3.97529	3.95054
Tox4_ENSMUST00000022766	7.15563	6.9875	7.10238	7.05209	6.87465	7.17725	7.02207	7.07501	6.97014	7.03011	7.15818	7.03017	7.0637	7.12085	6.97387
Mettl3_ENSMUST00000022767	5.57649	5.49669	5.5322	5.52808	5.47814	5.96446	5.76455	5.53038	5.44222	5.48707	5.78478	5.79928	5.47044	5.64928	5.71853
Dad1_ENSMUST00000022781	6.88659	6.60572	6.65255	6.45183	6.63771	6.99451	6.71369	6.68186	6.54012	6.69103	6.80719	6.64538	6.78821	6.52726	6.64399
Lrp10_ENSMUST00000022782	5.74909	5.77428	5.74709	5.62259	5.88238	4.7982	5.13652	5.33523	5.58622	5.30507	4.88652	5.12759	5.36704	5.51609	5.25987
Haus4_ENSMUST00000022784	5.68575	5.82391	5.68393	5.88658	5.87207	5.35947	5.32223	5.61226	5.77028	5.06847	4.95236	4.96232	5.09235	5.28995	5.31504
4931414P19Rik_ENSMUST00000022786	1.8227	2.47407	2.22946	2.79991	2.46677	1.96237	2.9267	2.62875	2.32059	2.93382	2.49561	2.66305	2.16094	2.40476	2.91526
Acin1_ENSMUST00000022793	8.52172	8.33233	8.46624	8.38908	8.30094	8.57674	8.46919	8.48718	8.36687	8.39296	8.65115	8.52329	8.40506	8.40845	8.51238
Psmb5_ENSMUST00000022803	8.20693	8.25784	8.25099	8.26637	8.20567	8.31295	8.25636	8.25731	8.2525	8.225	8.29717	8.36385	8.1833	8.26903	8.26793
Pabpn1_ENSMUST00000022808	5.81347	5.62545	5.97118	5.7077	5.58715	5.72346	5.46368	6.04461	5.50234	5.52087	5.74198	5.64182	5.63528	5.65382	5.80202
Efs_ENSMUST00000022813	3.53891	3.62358	3.44405	3.13526	3.30254	3.54733	3.4044	3.11418	3.6881	2.46337	3.18468	2.50479	2.64636	2.48841	2.63209
Ngdn_ENSMUST00000022815	6.33082	6.13572	6.19676	6.17348	5.9943	6.73455	6.4485	6.20274	6.10357	6.30871	6.71537	6.33731	6.40886	6.37071	6.32449
Sub1_ENSMUST00000022816	7.97327	7.90726	8.10191	7.97768	7.93406	8.23524	8.08043	8.2381	8.00346	7.96062	8.39709	8.10406	8.3451	8.12289	8.02813
Dhrs4_ENSMUST00000022821	4.47945	4.61984	4.34074	4.59372	4.42508	4.64985	4.78886	4.16027	4.39437	4.44147	4.3966	4.80989	4.43253	4.37759	4.47137
Ripk3_ENSMUST00000022830	5.28213	5.86243	5.44111	5.84144	5.56173	4.76011	5.08308	5.19169	5.56758	4.76428	3.91432	4.58114	4.15059	4.44195	4.64507
Khnyn_ENSMUST00000022831	4.58737	4.61232	4.43817	4.4805	4.62651	4.34988	4.32989	4.8642	4.82937	4.24315	4.31553	4.18417	4.19152	4.28703	4.26268
Cct5_ENSMUST00000022842	10.1488	10.2303	10.2355	10.2179	10.2044	10.3409	10.3148	10.2938	10.1811	10.2188	10.3123	10.3453	10.2244	10.1917	10.2577
Tars_ENSMUST00000022849	9.103	9.19115	9.16798	9.10061	9.01337	9.25013	9.26055	9.11447	9.09269	9.13392	9.23927	9.23054	9.07844	9.03846	9.15357
Brix1_ENSMUST00000022855	8.27441	8.2746	8.32371	8.32552	8.28808	8.51088	8.60704	8.36062	8.39146	8.35775	8.5243	8.52973	8.35752	8.44882	8.40648
Rad1_ENSMUST00000022856	4.99915	5.21848	4.93199	5.02711	5.10257	5.07138	4.86119	5.1466	4.97792	4.7853	5.1049	5.1411	4.72514	4.91987	5.0994
Mtdh_ENSMUST00000022865	8.37447	8.29116	8.16108	8.10386	8.27119	8.41454	8.28294	8.29809	8.22124	8.45438	8.50524	8.36457	8.41913	8.38613	8.4735
Laptm4b_ENSMUST00000022867	7.46361	7.42183	7.46804	7.32112	7.38759	7.42409	7.33435	7.46118	7.51066	7.24631	7.27643	7.18498	7.2301	7.03824	7.23933
Sdc2_ENSMUST00000022871	3.59169	3.49873	3.26972	3.47629	3.72523	3.33052	3.24052	3.4473	3.51212	3.47203	3.32384	2.872	3.95052	3.75652	3.02524
Ank_ENSMUST00000022875	2.83735	2.50686	2.38418	2.53417	2.9574	2.46684	2.45202	2.27365	2.87556	2.31715	2.1663	2.06869	1.88963	2.60545	2.82691
Rnf19a_ENSMUST00000022890	3.72369	3.80591	3.70121	3.91019	3.88409	3.98731	3.73213	3.83607	4.14565	4.04833	3.82341	3.91197	3.95052	3.98972	3.8193
Ywhaz_ENSMUST00000022894	9.42246	9.2963	9.55563	9.3726	9.34087	9.54785	9.33609	9.63182	9.32462	9.25997	9.56499	9.33088	9.51773	9.2905	9.25652
Grhl2_ENSMUST00000022895	4.03454	4.33946	3.46732	3.80663	4.0878	4.58595	4.72827	4.00726	4.1755	4.74296	4.53195	4.62027	3.71815	3.93112	4.8307
Rrm2b_ENSMUST00000022901	2.43681	2.25994	2.28289	1.8398	2.31273	1.89366	2.37506	2.33924	1.65317	2.23807	2.37275	2.327	2.9143	2.52849	2.32314
Atp6v1c1_ENSMUST00000022904	6.66844	6.63753	6.7996	6.74582	6.54777	6.97177	6.9191	6.75878	6.75141	6.78269	6.81016	6.7461	6.68091	6.65041	6.73177
Slc25a32_ENSMUST00000022908	4.53442	4.58954	4.68641	4.66946	4.75918	4.41262	4.6073	4.23109	4.56946	4.21245	4.29875	4.23547	4.30778	4.37759	4.53782
Dcaf13_ENSMUST00000022909	7.43861	7.78643	7.71767	7.77483	7.65834	7.69282	7.9629	7.57616	7.75841	7.84447	7.64162	7.97417	7.49211	7.75705	7.92372
Dpys_ENSMUST00000022915	2.18527	2.13965	2.11624	2.28726	2.50284	3.43092	3.0556	2.95591	2.58066	3.07701	3.29029	3.02562	3.22148	3.08013	3.55167
Lrp12_ENSMUST00000022916	4.19098	4.32114	4.37805	4.53822	4.72904	3.38159	3.86472	4.10478	4.46052	3.48921	3.29029	3.79715	3.90202	3.59605	3.89368
Eif3h_ENSMUST00000022925	8.78093	8.80488	8.91331	8.85103	8.74678	8.89503	8.83965	8.83003	8.72747	8.79849	8.86781	8.88184	8.75659	8.77876	8.809
Rad21_ENSMUST00000022927	8.50002	8.95241	8.70824	8.95647	8.93798	8.40454	8.79879	8.66797	8.89457	8.79374	8.37725	8.75684	8.62084	8.89876	8.74464
Shcbp1_ENSMUST00000022945	6.83826	7.13507	7.02608	7.03929	7.07513	6.96551	7.2439	6.97538	7.15379	6.98995	6.9157	7.16362	6.79487	6.9762	6.93213
Rida_ENSMUST00000022946	5.26598	4.96481	5.11256	5.12722	4.80323	4.90679	4.81094	5.18278	5.07614	4.99822	5.25158	5.17434	5.16608	4.97166	5.18483
Matn2_ENSMUST00000022947	1.98935	2.13965	2.47881	1.98918	2.27151	1.05967	1.31452	2.4621	2.5199	1.76075	1.52475	1.15115	2.16094	1.76493	2.18779
Khdrbs3_ENSMUST00000022954	4.43199	4.18594	4.60482	4.45504	4.26628	4.46092	4.26738	4.56849	4.1755	4.15979	4.41228	4.27278	4.63898	4.50357	4.36034
Eif3e_ENSMUST00000022960	9.62043	9.54423	9.65841	9.54163	9.49096	9.79334	9.6862	9.69425	9.44567	9.57378	9.8537	9.73598	9.83275	9.62016	9.64008
Emc2_ENSMUST00000022962	6.9503	6.75989	7.1245	6.9172	6.87465	7.00676	6.80086	7.08221	6.8457	6.60895	7.11332	6.89112	7.13625	6.89804	6.68437
Washc5_ENSMUST00000022976	6.40151	6.96112	6.65509	7.13992	7.05249	6.64593	7.08686	6.5939	6.97439	7.09886	6.56214	7.04462	6.40886	6.90567	7.17964
Sqle_ENSMUST00000022977	7.80185	7.99294	7.74411	7.76537	8.02679	7.63479	7.72972	7.9155	8.04851	7.91527	7.57873	7.80831	7.77733	7.95934	8.01985
Ndufb9_ENSMUST00000022980	6.52653	6.44792	6.3918	6.24703	6.25707	6.53187	6.38122	6.39621	6.29476	6.31112	6.49377	6.37498	6.30078	6.18885	6.05957
Tbc1d31_ENSMUST00000022992	5.46773	5.71236	5.55953	5.74319	5.5997	5.34023	5.64671	5.50917	5.83717	5.64866	5.48452	5.78644	5.23622	5.51609	5.6168
Derl1_ENSMUST00000022993	6.28079	6.2418	6.23455	6.27154	6.23847	6.26572	6.27667	6.08818	6.19628	6.25198	6.28391	6.19878	6.189	6.30012	6.25846
Mtbp_ENSMUST00000022998	5.92052	6.23447	6.18978	6.35421	6.16721	5.94761	6.1204	6.09294	6.28109	6.27196	5.85531	6.11223	6.08422	6.26199	6.26968
Trmu_ENSMUST00000023019	2.58303	3.12916	2.43227	3.31583	2.87723	2.41875	3.19646	2.68028	2.82623	2.74654	2.30716	2.80566	2.24111	2.64245	2.85697
L3mbtl2_ENSMUST00000023029	6.56444	6.77848	6.41592	6.64434	6.67177	6.96551	7.18453	6.59726	6.83015	7.19751	6.9855	7.03922	6.64452	6.68407	7.22212
Rbx1_ENSMUST00000023036	6.97037	6.65226	6.94344	6.71754	6.63365	6.92735	6.85501	6.86837	6.69241	6.72586	7.11571	6.78751	7.03306	6.7785	6.68646
Slc25a17_ENSMUST00000023040	6.11638	6.15912	6.15438	6.01989	6.2597	6.06943	6.07854	6.17607	6.08796	6.26699	5.93347	6.07751	6.31937	6.14441	6.2127
Adsl_ENSMUST00000023043	7.75729	7.8421	7.77358	7.78679	7.78367	7.85747	7.93971	7.79503	7.8164	7.9105	7.82121	7.97133	7.6213	7.59074	7.93345
Mief1_ENSMUST00000023048	5.09977	5.14226	5.14178	5.42257	5.15451	5.01588	4.86119	4.96113	4.90852	4.94941	4.73265	4.82672	4.87086	4.91231	5.08042
Tab1_ENSMUST00000023050	2.89449	2.87661	3.46732	2.95326	2.73284	3.13602	3.0556	2.95591	3.09968	3.3075	3.10972	2.99618	3.09774	2.71371	2.88641
Dscc1_ENSMUST00000023059	4.95282	5.11593	5.14899	4.93802	4.64277	5.28765	5.31194	5.24399	5.13809	5.34807	5.26891	5.5074	5.29375	5.02166	5.28772
Josd1_ENSMUST00000023061	2.31651	2.0084	2.61006	2.28726	2.35281	1.74556	2.33498	1.97667	2.58066	2.46337	1.92529	2.70005	1.98585	2.2694	2.18779
Tomm22_ENSMUST00000023062	6.3941	6.38537	6.45136	6.33107	6.26496	6.50621	6.37629	6.25466	6.04818	6.32315	6.47895	6.31065	6.41752	6.40071	6.34053
Cby1_ENSMUST00000023064	3.6918	3.37985	3.81442	3.69506	3.26102	3.83072	3.24052	3.5056	3.64608	3.07701	3.70108	3.31513	3.68986	3.57707	3.17592
Dmc1_ENSMUST00000023065	4.16799	3.99113	4.49589	4.43782	3.91118	4.01992	4.21314	4.23109	4.48457	4.11623	3.62236	4.0036	3.7459	3.66958	4.0186
Smc1b_ENSMUST00000023068	5.2108	5.52097	5.08274	5.4868	5.56173	4.72098	5.31194	5.36703	5.82466	5.4785	4.36471	5.1411	4.75275	4.97891	5.55397
Fam118a_ENSMUST00000023069	4.17953	4.07004	4.01723	4.19287	4.1798	4.15816	4.24593	4.06656	4.1755	4.17048	4.3966	4.07575	3.87714	4.17787	4.28496
Samm50_ENSMUST00000023071	7.92095	8.21507	7.98988	8.16206	8.20362	8.13834	8.25703	7.99904	8.21106	8.29809	8.15178	8.22321	8.19089	8.3586	8.29013
Parvb_ENSMUST00000023072	6.28881	6.07961	6.56897	6.37246	6.28323	6.18176	5.9942	6.44171	6.12922	6.29168	5.97629	5.78644	6.40886	6.18572	6.20103
Ndufa6_ENSMUST00000023085	7.02257	6.80838	6.89063	6.72111	6.6458	7.01082	6.82277	6.91482	6.80491	6.77745	7.04957	6.90505	7.12044	6.84943	6.76187
Smdt1_ENSMUST00000023086	5.55893	5.34627	5.4702	5.26545	5.36511	5.48739	5.20483	5.35914	5.21196	5.14632	5.40053	5.18743	5.59771	5.18102	5.08678
Twf1_ENSMUST00000023087	6.91448	6.74279	6.89921	6.8937	6.80414	6.94443	6.76361	6.8986	6.85496	6.82895	6.99854	6.83817	7.08286	6.92644	6.82596
Naga_ENSMUST00000023088	5.13577	5.08369	5.14899	5.07246	5.00534	4.47274	4.68906	5.28618	5.24518	5.03961	4.61561	4.85979	5.20658	5.38579	5.07404
Wbp2nl_ENSMUST00000023089	3.17377	2.92594	3.243	3.21831	2.53803	2.15081	2.16251	2.20494	2.77516	2.19685	2.30716	1.95086	1.42397	2.40476	2.56083
Sept3_ENSMUST00000023095	1.98935	2.13965	2.38418	2.46783	2.42977	1.96237	2.29376	2.62875	2.35578	2.46337	1.73888	2.66305	2.31705	1.95338	2.56083
Slc38a2_ENSMUST00000023099	9.24811	9.13883	8.99364	8.90648	9.01727	9.34567	9.19978	9.39356	9.27378	9.32479	9.33853	9.30747	9.16768	9.04969	9.38069
Srebf2_ENSMUST00000023100	8.122	8.28468	7.95943	8.10113	8.41358	8.09405	8.21831	8.17326	8.32365	8.51695	8.21461	8.29751	8.15642	8.28667	8.45335
Slc38a4_ENSMUST00000023101	9.43996	9.33989	9.28637	9.2257	9.45517	9.06382	8.9445	9.38096	9.37024	9.198	9.03793	9.01488	9.31734	9.18357	9.14979
Rpap3_ENSMUST00000023104	7.19312	7.06386	6.93512	7.01627	6.91704	6.99451	6.83718	7.12468	7.03263	6.69843	6.92119	6.92667	6.90663	6.72561	6.6948
Pmm1_ENSMUST00000023112	6.9587	6.89763	6.98837	6.98992	6.95659	7.41645	7.35453	7.18166	6.9758	7.08056	7.26136	7.26123	7.04428	6.9543	7.1251
Polr3h_ENSMUST00000023113	4.73547	4.70001	4.70611	4.60919	4.48942	4.7982	4.98937	4.95068	4.64252	4.69195	4.76964	4.85159	4.73901	4.46279	4.89005
Aco2_ENSMUST00000023116	9.05993	9.26099	9.00163	9.11897	9.17089	8.99528	9.08742	9.01512	9.17288	9.13869	8.90915	9.11073	9.0668	9.12023	9.11056
Phf5a_ENSMUST00000023117	6.4332	6.21724	6.32649	6.10147	6.09815	6.46832	6.20899	6.3211	6.11131	6.10374	6.35866	6.14614	6.33771	6.09855	6.13203
Col2a1_ENSMUST00000023123	3.53891	4.03675	3.32171	3.55829	3.54669	3.35628	3.44262	3.56164	3.6881	3.22788	3.32384	2.99618	2.58624	3.10685	3.60578
Itga5_ENSMUST00000023128	7.93973	8.08607	7.82515	7.91914	8.14206	7.85295	7.93217	7.76997	7.97898	7.80558	7.7795	7.96184	7.87322	8.02385	7.90766
Gtsf1_ENSMUST00000023129	2.8662	2.8513	2.69136	2.65835	2.42977	2.26402	2.25132	2.68028	2.63895	2.1107	2.49561	1.82253	1.67551	1.54812	2.08994
Pde1b_ENSMUST00000023132	2.43681	2.50686	1.71099	1.73087	1.99588	3.47862	3.56894	2.86976	2.80092	3.2482	2.81163	3.02562	2.52351	2.40476	3.7569
Ppp1r1a_ENSMUST00000023133	3.73937	3.37985	2.94448	2.65835	3.28193	4.337	3.93343	4.08579	3.67423	3.86311	4.1193	3.92765	2.9143	3.20903	4.04496
Litaf_ENSMUST00000023143	5.03136	4.8417	4.88955	4.82331	4.59344	4.72098	4.58184	5.03227	4.86033	4.6158	4.91982	4.55108	4.54735	4.29867	4.41187
Nubp1_ENSMUST00000023146	5.93761	5.8719	6.08085	6.01118	5.85822	5.89145	5.88741	5.73309	5.87404	5.70488	5.77874	5.87807	5.8677	5.81642	5.85511
1810013L24Rik_ENSMUST00000023150	6.21502	5.96923	6.32012	6.13659	6.11573	6.52052	6.22278	6.30887	6.07746	6.29656	6.51571	6.23074	6.56887	6.53465	6.31098
Bcl6_ENSMUST00000023151	2.39781	2.0084	2.33442	2.08081	2.35281	1.66539	1.39469	1.70537	2.00311	2.49772	2.1663	2.17763	2.96239	3.05291	2.03841
Il1rap_ENSMUST00000023156	2.58303	2.57028	2.05612	1.67315	2.50284	2.41875	2.2076	1.60228	2.17057	2.39211	1.63578	1.82253	1.88963	1.83052	2.18779
Anks3_ENSMUST00000023157	2.43681	3.06455	2.73035	2.39829	2.53803	2.31746	2.75509	2.4621	2.66724	2.82979	2.81163	2.90406	3.05402	3.10685	2.91526
Crebbp_ENSMUST00000023165	7.57704	7.56007	7.6081	7.66993	7.68508	7.57845	7.68259	7.49575	7.65449	7.68685	7.55421	7.61241	7.59675	7.74859	7.72211
Hes1_ENSMUST00000023171	5.98771	5.88131	6.28453	5.88658	5.86862	5.56124	5.24863	5.81606	5.79613	5.46119	5.69147	5.53326	6.21405	5.91798	5.55855
Zfp263_ENSMUST00000023176	4.99262	5.06179	5.27302	5.01554	5.16017	5.36583	5.53175	5.08101	5.08665	5.55389	5.65239	5.56368	5.46211	5.48077	5.5722
Zfp7_ENSMUST00000023179	5.33469	5.87818	5.6022	6.01699	5.9162	5.01588	5.60098	5.68974	5.92472	5.83148	5.36068	5.76477	5.3936	5.71153	5.74288
Glyr1_ENSMUST00000023189	7.86754	7.79972	7.96557	7.88618	7.72093	8.07672	7.99138	7.95133	7.83833	7.70442	8.0873	7.9647	7.87007	7.72615	7.89413
Ercc4_ENSMUST00000023206	4.26868	4.33033	4.573	4.50552	4.61007	4.68076	4.86823	4.2986	4.26151	4.49347	4.79379	4.57119	4.96829	5.04257	4.60135
Cyc1_ENSMUST00000023210	8.01976	8.15492	8.15483	8.16402	8.21045	8.10168	8.17569	7.96178	8.02	7.99033	7.96238	8.05224	7.99672	8.14803	8.06401
Sharpin_ENSMUST00000023211	4.36281	4.34854	4.15259	3.94718	4.01474	4.50765	4.03698	4.08579	4.32504	4.05987	4.45833	4.17105	4.19152	3.87005	4.1088
Hgh1_ENSMUST00000023213	4.85545	4.75564	4.73515	4.61686	4.68262	4.68076	4.77395	4.73613	4.78487	4.48493	4.6688	4.57119	4.48286	4.37759	4.75291
Dgat1_ENSMUST00000023214	4.35265	4.41914	4.12359	4.53012	4.55101	4.36265	4.38981	4.10478	4.45242	4.59215	4.04077	4.08975	3.99744	4.16521	4.24005
Bop1_ENSMUST00000023217	7.43139	7.43573	7.30808	7.45772	7.33354	7.48666	7.5619	7.29551	7.30661	7.42316	7.33108	7.49627	7.13363	7.30373	7.46101
Fbxl6_ENSMUST00000023219	5.41011	5.39087	5.27961	5.34615	5.17142	5.10216	5.04632	5.10948	5.4007	5.50407	5.24284	5.15449	5.16608	5.03563	5.22572
Slc52a2_ENSMUST00000023220	2.89449	3.28851	3.18804	3.00095	3.26102	2.94549	3.08005	2.57531	2.82623	2.39211	2.66226	2.50479	2.75957	3.32735	2.9713
Gpaa1_ENSMUST00000023221	5.20517	5.68755	5.22605	5.51582	5.67672	5.00778	5.39712	5.22677	5.63359	5.67891	4.70745	5.35916	4.94454	5.19353	5.60799
Oplah_ENSMUST00000023222	2.65093	3.2308	3.62048	3.7658	3.32286	2.68585	3.42364	2.95591	3.39859	3.88923	2.85818	3.40749	3.26047	3.70499	3.17592
Grina_ENSMUST00000023225	5.20517	5.0283	4.79155	4.91331	4.72904	5.10216	4.90291	4.94015	4.94941	5.01017	4.98419	4.69547	4.77985	4.68296	4.72058
Naprt_ENSMUST00000023237	4.21361	4.82879	4.55138	4.82993	4.57662	4.00371	4.07398	4.54088	4.62099	4.04833	4.04077	4.08975	3.79984	4.38852	4.00525
Rpl24_ENSMUST00000023269	6.87421	7.05141	7.16953	7.11304	7.16651	7.20587	7.16752	7.2684	7.04211	7.147	7.15586	7.35119	7.3159	7.29504	7.24645
Cep97_ENSMUST00000023270	4.75102	4.64215	5.03681	4.88181	4.96065	4.88925	4.71271	5.03227	4.94364	4.75721	4.98419	4.99246	4.8834	4.92738	5.10568
Lmf2_ENSMUST00000023283	5.25511	5.62918	5.15617	5.63398	5.65684	4.78877	5.36763	5.23541	5.55249	5.44808	4.6688	5.19393	5.10312	5.3471	5.50735
Mapk8ip2_ENSMUST00000023291	4.03454	4.20605	4.13816	4.09736	3.87035	3.59139	3.26205	4.43985	4.39437	3.86311	3.38869	3.26663	2.75957	3.47822	3.86438
Rabl2_ENSMUST00000023294	2.58303	2.63104	2.56762	2.36222	2.53803	2.72593	2.33498	2.91348	2.80092	2.71768	2.98942	2.83921	1.88963	2.87783	2.52384
Morc1_ENSMUST00000023330	6.5754	6.76837	6.03875	6.11237	6.43562	7.13509	7.26672	6.5145	6.6273	7.09606	6.93482	7.02471	6.3468	6.51484	7.09704
Nectin3_ENSMUST00000023334	5.93421	5.90917	5.5541	5.60726	5.76476	5.95185	6.02916	6.07861	6.03738	6.18504	6.1312	5.94894	6.00607	5.94415	6.29185
Atg3_ENSMUST00000023343	4.78919	4.67858	4.93199	4.79653	4.83187	5.12482	4.93007	5.08101	4.7784	4.83987	5.09522	4.96991	4.87086	5.04947	4.90451
Slc35a5_ENSMUST00000023344	3.10281	2.63104	2.76832	2.82662	3.21827	2.36899	2.78515	2.68028	3.07877	2.82979	2.76354	2.54601	2.9143	2.52849	2.82691
Prkdc_ENSMUST00000023352	6.77499	7.82025	6.89921	7.71173	7.62498	6.92735	8.05058	7.09887	7.85226	8.08798	7.02937	8.05046	6.85023	7.61188	8.07524
Mcm4_ENSMUST00000023353	9.85982	9.8179	9.90734	9.8675	9.77436	9.85168	9.82537	9.90115	9.84773	9.80375	9.95286	9.85966	9.92173	9.83064	9.78831
Fopnl_ENSMUST00000023357	4.80418	4.46158	4.67646	4.49723	4.49838	4.53046	4.17959	4.60894	4.64963	4.58418	4.33211	4.0616	4.12968	4.01815	4.32852
Nde1_ENSMUST00000023359	6.15197	6.03253	6.15079	6.04286	6.01005	6.09644	5.95176	6.13048	5.99057	5.82473	6.04329	5.86591	5.99455	6.1151	5.81739
Mpv17l_ENSMUST00000023360	3.57431	3.57802	3.83245	3.60533	3.15167	2.72593	3.15102	3.41725	3.29363	3.16514	2.98942	3.19068	3.26047	3.39395	3.55167
Ntan1_ENSMUST00000023362	5.76449	5.74365	5.8917	5.76407	5.5997	5.61024	5.68309	5.83891	5.82466	5.53748	5.43164	5.54347	5.43679	5.42878	5.53085
Rrn3_ENSMUST00000023363	8.66614	8.81146	8.82656	8.87162	8.86234	8.91087	9.10652	8.81209	8.88519	8.99916	8.90431	9.03266	9.00427	9.05741	9.09999
Pla2g10_ENSMUST00000023364	4.19098	4.04793	3.75892	4.09736	4.14598	3.71601	3.60309	3.92421	3.83249	4.03669	3.51025	3.69089	3.22148	3.18416	3.78843
Bfar_ENSMUST00000023365	4.71974	4.44475	4.47308	4.50552	4.38699	4.57502	4.63232	4.48401	4.34269	4.47634	4.51752	4.62027	4.7932	4.65608	4.42196
Qtrt2_ENSMUST00000023387	5.00565	5.25754	4.99739	5.26056	5.16017	4.95817	5.24863	4.80739	5.29589	5.01017	4.9088	5.35916	4.81956	5.07676	5.04822
Mrpl40_ENSMUST00000023391	6.10129	6.11726	5.94655	6.01989	6.01317	6.3191	6.23099	6.21152	6.01829	6.17976	6.39857	6.34901	6.16351	6.21672	6.15035
Gbe1_ENSMUST00000023393	3.17377	3.34401	3.15975	2.95326	3.92454	2.60219	3.08005	3.5056	3.44835	2.85651	3.07072	3.26663	2.64636	2.52849	3.10254
Arl6_ENSMUST00000023405	4.3729	4.25513	4.31532	4.4805	4.7517	4.61825	4.44733	4.37877	4.37735	4.6158	4.89771	4.52039	4.83255	4.72668	4.55626
Riox2_ENSMUST00000023407	6.28881	6.1331	6.05804	6.13659	6.1011	6.10025	6.15821	6.13971	6.14187	5.95097	6.23184	6.15282	6.189	6.00932	6.09152
Cldnd1_ENSMUST00000023426	4.16799	4.2743	4.22263	4.44646	4.06385	4.37531	4.2567	4.60894	4.18531	4.40574	4.04077	4.15782	4.34454	4.39936	4.53782
Tbc1d23_ENSMUST00000023431	5.56774	5.56834	5.66895	5.71486	5.37	5.94337	5.68707	5.74524	5.61555	5.60993	5.93347	5.61785	5.76297	5.84448	5.76286
Nit2_ENSMUST00000023432	6.75392	6.87583	6.7973	6.8258	6.79143	6.94018	7.04865	6.65313	6.86415	7.04034	7.02937	7.18172	7.00463	7.17235	6.99936
Tmem45a_ENSMUST00000023435	3.36786	3.36204	2.47881	3.06967	3.6468	3.13602	2.97965	2.99714	3.03602	3.12175	3.07072	3.29108	3.77312	3.28118	3.47622
Lztr1_ENSMUST00000023444	4.35265	4.61984	4.56223	4.59372	4.72141	3.98731	4.36016	4.16027	4.64252	4.57617	4.08057	4.45696	4.19152	4.49348	4.21705
Aifm3_ENSMUST00000023448	1.56554	1.91377	1.99339	1.94108	2.09373	0.784031	1.31452	1.89178	2.00311	1.21761	1.12882	1.44066	1.27958	1.62407	2.03841
Snap29_ENSMUST00000023449	4.53442	4.28379	4.19502	4.2532	3.93777	4.11353	4.24593	4.54088	4.27076	4.38754	4.48823	4.15782	4.6827	4.54324	3.93653
Sdf2l1_ENSMUST00000023453	5.00565	5.08369	4.55138	4.42038	5.08483	5.06358	5.07702	5.05196	4.75223	4.98011	5.12407	4.9393	5.13494	5.00755	4.96786
Ppil2_ENSMUST00000023455	7.13206	7.16105	7.08744	7.05633	6.75638	7.16637	7.1387	6.9728	7.04885	7.0345	7.22186	7.01557	6.95795	6.96893	6.92505
Ncbp2_ENSMUST00000023460	5.92052	5.76074	5.8874	5.9487	5.82655	6.11919	5.9715	6.00474	5.66899	5.85817	6.12645	6.0238	6.08964	6.09855	5.88459
Pak2_ENSMUST00000023467	7.41683	7.30317	7.41816	7.41104	7.30701	7.31007	7.22484	7.2663	7.25279	7.19751	7.27429	7.17023	7.18774	7.14199	7.09862
Tfrc_ENSMUST00000023486	9.11507	9.35741	9.05156	9.16124	9.53517	9.38375	9.60454	9.35246	9.43028	9.61764	9.373	9.55566	9.27095	9.356	9.68109
Fyttd1_ENSMUST00000023489	6.79951	6.76159	6.84694	6.85691	6.9053	6.60891	6.70585	6.88494	6.8395	6.66481	6.51207	6.62147	6.84062	6.82751	6.71135
Lrch3_ENSMUST00000023491	5.01212	5.43839	5.45282	5.56425	5.42273	4.96656	5.08912	5.27784	5.46254	5.24567	4.6688	5.06515	5.0032	5.07676	4.94005
Lmln_ENSMUST00000023497	2.39781	2.53892	1.9278	2.28726	2.42977	2.31746	2.48902	1.80159	2.28452	2.65818	1.73888	2.80566	2.52351	2.56749	1.98497
Snx4_ENSMUST00000023502	6.38914	6.34967	6.43375	6.41489	6.30637	6.38941	6.42483	6.41914	6.35904	6.27444	6.34238	6.28044	6.40016	6.36795	6.33787
Gsk3b_ENSMUST00000023507	5.26598	5.3598	5.45282	5.43565	5.399	5.07914	5.36265	5.25253	5.54489	5.408	5.24284	5.45426	5.32167	5.55541	5.49307
Klhl24_ENSMUST00000023509	6.18097	6.44581	6.19328	6.3565	6.31907	6.17454	6.34132	6.49665	6.58715	6.486	6.07811	6.4529	6.22887	6.30589	6.36688
Umps_ENSMUST00000023510	8.07101	8.14389	8.08509	8.12957	8.03989	7.93752	8.02955	7.93552	8.11035	7.966	7.95838	8.06471	8.04776	8.17037	7.92461
Rabl3_ENSMUST00000023524	3.80045	3.85767	3.75892	3.70949	3.91118	3.95396	3.60309	3.74221	3.86949	3.60403	3.59514	3.81412	3.71815	3.59605	3.86438
Gtf2e1_ENSMUST00000023525	6.0105	6.02971	6.13271	5.92417	5.9262	6.0772	6.00382	6.18501	5.89811	5.94164	6.18239	6.0347	6.13232	6.00932	5.91348
Ccdc14_ENSMUST00000023532	5.74132	5.68038	5.8874	5.7744	5.57873	5.64724	5.82729	6.00978	5.83717	5.78703	5.95504	5.67936	5.92344	5.78782	5.73076
Iqcb1_ENSMUST00000023535	5.35519	5.41699	5.3564	5.46571	5.37488	5.53328	5.53617	5.58548	5.58622	5.68638	5.75434	5.66539	5.62037	5.4498	5.38376
Pdia5_ENSMUST00000023550	5.42958	5.46784	5.31211	5.3916	5.29484	5.28765	5.24863	5.22677	5.37091	5.28554	5.34442	5.09323	5.49518	5.09689	5.36296
Slc49a4_ENSMUST00000023554	5.11187	5.43414	4.97321	5.13792	5.19916	5.00778	5.03386	5.06171	5.16314	5.1409	5.11452	5.17434	5.3936	5.17472	5.17293
Ehhadh_ENSMUST00000023559	1.63425	1.91377	1.63082	1.98918	1.37244	1.39408	2.11597	1.97667	1.91148	1.70304	1.92529	2.06869	1.67551	1.54812	1.74891
Senp2_ENSMUST00000023561	5.62795	5.83041	5.87875	5.7291	5.86862	5.62091	5.7981	5.58548	5.83405	5.98163	5.76048	5.77348	5.62037	5.85634	6.07563
Tmem41a_ENSMUST00000023562	3.88747	3.49873	3.77766	3.66577	3.84247	2.83988	2.95342	4.0273	3.64608	2.59612	2.94699	2.90406	3.22148	2.78161	2.79621
Cxadr_ENSMUST00000023572	6.05191	5.82391	5.42931	5.22586	5.58295	5.97281	5.5925	5.74524	5.65846	5.47419	6.09279	5.68398	5.67911	5.68074	5.58123
Usp25_ENSMUST00000023580	2.71578	2.47407	2.80532	2.43348	2.63872	2.51338	2.97965	2.51982	2.48854	2.95869	2.49561	3.16445	2.9143	3.02517	2.52384
Rfc4_ENSMUST00000023598	7.43741	7.3793	7.31772	7.31406	7.11646	7.62158	7.62766	7.38169	7.18592	7.36968	7.72874	7.47108	7.44422	7.41348	7.36623
Eif4a2_ENSMUST00000023599	8.31226	8.27162	8.59792	8.52426	8.39391	7.97021	7.96782	8.56292	8.41355	8.11035	8.2379	8.16238	8.88457	8.78859	8.00985
St6gal1_ENSMUST00000023601	3.73937	3.77932	2.94448	3.13526	3.52931	2.94549	3.30418	3.35518	3.83249	3.26824	3.62236	3.57618	2.45792	3.10685	3.35508
Atp5j_ENSMUST00000023608	7.87909	7.6682	7.98283	7.79949	7.74842	8.18671	7.87567	7.95918	7.75182	7.83862	8.1199	7.89262	8.30019	8.00977	7.89865
Ets2_ENSMUST00000023612	5.59816	5.59527	5.58102	5.52401	5.73853	5.63677	5.45436	5.75728	5.72052	5.67891	5.69147	5.56368	5.84864	5.90662	5.83259
Vps26c_ENSMUST00000023615	4.94608	4.92897	4.98937	4.98028	4.77401	4.99143	5.00222	5.03227	5.01141	5.12999	5.12407	4.79287	5.0815	4.84249	4.91883
Pros1_ENSMUST00000023629	5.80976	5.78434	5.9257	5.84797	5.91954	6.06553	6.04477	5.55129	5.55628	5.54981	5.69788	5.70233	6.16351	6.24104	5.65152
Psmg1_ENSMUST00000023630	7.04798	7.03183	7.03584	6.9172	6.87809	7.14805	7.07474	7.00347	6.88989	6.94397	7.18354	7.14194	7.05541	7.01551	6.99599
Chaf1b_ENSMUST00000023666	7.26666	7.47251	7.25224	7.31759	7.16369	7.31828	7.46194	7.23863	7.44171	7.5544	7.28497	7.60998	7.12309	7.3309	7.51503
Atp5o_ENSMUST00000023677	7.70534	7.5542	7.76187	7.60485	7.54615	7.72778	7.44557	7.7994	7.54155	7.45191	7.713	7.4345	7.69076	7.47373	7.37664
Donson_ENSMUST00000023682	4.39286	4.72112	4.4024	4.59372	4.65083	4.62886	4.77395	4.43985	4.62099	4.72857	4.74508	4.73166	4.49926	4.76912	4.64507
Gart_ENSMUST00000023684	10.1955	10.1053	10.1585	10.0591	10.0936	10.2948	10.1339	10.1963	10.0991	10.1874	10.3237	10.243	10.2603	10.1565	10.2517
Tmem50b_ENSMUST00000023686	3.46538	3.89531	3.68144	3.52605	3.92454	3.69597	3.19646	3.38655	3.64608	2.90851	3.48081	3.08277	3.44104	3.45761	3.26828
Ifnar1_ENSMUST00000023689	4.99262	4.94102	4.55138	4.8496	4.85299	5.15449	5.37259	4.68659	4.87253	5.33388	5.26028	5.21325	4.93252	4.98612	5.16093
Ifnar2_ENSMUST00000023693	3.36786	3.37985	3.53496	3.38936	3.72523	3.47862	3.38491	3.56164	3.49644	3.3075	3.22075	2.96612	3.40669	3.47822	3.05147
Cfap298_ENSMUST00000023694	5.33985	5.19352	5.23285	5.05562	5.10843	5.08685	4.92333	5.31091	5.15816	4.89246	5.18924	4.80141	5.09235	5.18102	5.06118
Sod1_ENSMUST00000023707	8.9391	8.73048	9.0554	8.74691	8.85887	9.30739	9.02582	9.13942	8.77007	9.01703	9.36144	9.17701	9.29463	9.05912	9.0634
Lmbr1l_ENSMUST00000023736	3.62584	3.85767	3.4204	3.69506	3.95089	3.0439	2.89948	3.69288	3.55817	3.40121	3.03064	3.47308	3.50739	3.4367	3.58797
Kmt2d_ENSMUST00000023741	6.76162	7.41104	6.73396	7.32112	7.28905	6.76372	7.30871	6.73461	7.26441	7.26013	6.67694	7.2674	6.58047	7.18963	7.30349
Nckap5l_ENSMUST00000023747	4.02177	4.00267	4.37805	4.57019	4.29741	3.63414	3.79257	3.81317	4.11517	3.26824	2.94699	3.67239	3.68986	3.75652	3.65793
Tmbim6_ENSMUST00000023749	8.46508	8.36456	8.42152	8.24486	8.38608	8.44712	8.30644	8.50516	8.31697	8.28093	8.43597	8.34208	8.5508	8.35304	8.38537
Racgap1_ENSMUST00000023756	7.91664	7.82107	7.80703	7.74363	7.80549	7.88317	7.65843	7.9155	7.77638	7.65676	7.90949	7.66715	7.86058	7.74965	7.65419
Asic1_ENSMUST00000023758	2.47478	2.71762	2.61006	2.85286	3.03335	1.5805	2.62818	2.4621	2.94653	2.74654	2.30716	2.90406	1.78654	2.96802	2.73279
Smarcd1_ENSMUST00000023759	7.63058	7.68889	7.68207	7.75671	7.65534	7.81977	7.79948	7.70304	7.69112	7.72722	7.67775	7.69948	7.56401	7.599	7.69636
Cox14_ENSMUST00000023761	3.6918	3.73848	3.34702	3.57414	3.45761	3.79349	3.38491	3.61557	3.58807	3.09955	3.77572	3.21645	3.14018	2.8144	3.31234
Cers5_ENSMUST00000023762	6.46891	6.43094	6.22092	6.05138	6.3216	6.28932	6.29507	6.43047	6.12157	6.21632	6.54446	6.28957	6.30078	6.18885	6.36165
Atf1_ENSMUST00000023769	6.20658	5.98095	6.22775	6.1042	6.12154	6.49755	6.19226	6.26313	6.04548	6.26699	6.25376	6.01649	6.07331	6.1052	6.16244
Slc11a2_ENSMUST00000023774	5.23866	5.3598	5.05996	5.25073	5.33041	5.16181	5.33752	5.24399	5.36229	5.12999	5.17092	5.32996	4.9204	5.1233	5.25423
Slc4a8_ENSMUST00000023776	5.05661	5.26235	4.88955	5.06126	5.11427	4.56401	4.68109	4.91885	5.13809	4.96177	4.33211	4.60084	4.41536	4.81845	4.54707
Krt18_ENSMUST00000023803	5.15927	5.61421	5.14178	5.33224	5.19365	4.34988	4.8822	5.35122	5.6514	5.26575	4.61561	4.98498	4.30778	4.51359	4.3069
Csad_ENSMUST00000023805	5.48178	5.80426	5.77066	5.74669	5.67672	5.1173	5.31709	5.38267	5.75058	5.40348	5.11452	5.23862	5.51143	5.69842	5.53085
Soat2_ENSMUST00000023806	3.07835	3.15007	2.22946	2.87862	3.15167	2.55847	2.78515	3.03721	2.32059	2.98315	2.01018	1.75382	2.58624	2.44719	2.73279
Amhr2_ENSMUST00000023809	2.31651	2.05349	1.71099	1.67315	1.83541	2.20853	1.79994	1.89178	2.45648	2.23807	2.1663	2.77131	2.16094	2.52849	2.32314
Prr13_ENSMUST00000023810	4.02177	4.00267	4.20889	3.93496	3.98954	4.49611	3.94679	3.76625	3.49644	4.12725	4.78176	4.08975	3.77312	3.78988	4.07083
Map3k12_ENSMUST00000023812	2.09063	2.50686	1.78694	2.32523	2.42977	2.60219	3.0556	2.33924	2.48854	2.93382	2.81163	2.73612	2.52351	2.31595	3.35508
Tarbp2_ENSMUST00000023813	5.70983	5.45529	5.78462	5.67499	5.45531	5.75769	5.84166	5.50203	5.52956	5.63329	5.76659	5.59839	5.72165	5.57468	5.60799
Calcoco1_ENSMUST00000023818	6.07989	6.06041	6.06568	5.96683	5.94599	6.34185	6.19786	6.01982	5.8801	6.02938	6.14064	6.12248	6.28668	6.03389	5.99007
Rttn_ENSMUST00000023828	5.25511	5.88755	5.4702	5.98177	5.95578	5.19788	5.95837	5.40581	6.07746	5.9907	5.43932	6.09497	5.29375	6.16363	6.04659
Nus1_ENSMUST00000023830	4.85545	4.98823	4.70611	5.00972	5.27933	4.98319	5.14234	4.62218	4.98917	5.23553	5.28604	5.05804	4.84543	5.19353	5.37859
Mospd1_ENSMUST00000023836	2.04088	2.29791	2.05612	1.98918	2.27151	2.94549	1.96659	1.97667	2.24753	1.64292	1.52475	2.327	2.45792	2.01109	1.87176
Noct_ENSMUST00000023849	8.02697	8.05453	8.41555	8.42994	8.46819	7.36503	7.38919	7.96568	8.03229	7.52035	7.54357	7.58424	8.03376	8.02473	7.44379
Ndufa5_ENSMUST00000023851	6.21221	6.0041	6.09959	6.02278	6.00691	6.32564	6.15534	6.35717	6.12413	5.95715	6.4025	6.11907	6.28668	5.94785	5.85138
Fhl1_ENSMUST00000023854	4.91189	4.6929	4.66644	4.59372	4.55101	5.49321	5.39225	4.7722	4.80411	5.36678	5.5709	5.48108	4.87086	4.6651	5.28219
Msrb2_ENSMUST00000023856	3.19667	3.30725	3.243	3.33456	2.84949	3.77451	3.63645	3.83607	3.09968	3.90211	3.93618	3.65365	3.29844	3.15885	3.65793
Rfc2_ENSMUST00000023867	6.51746	6.4813	6.35796	6.29086	6.1784	6.45646	6.38613	6.34923	6.37628	6.37026	6.56214	6.37211	6.46419	6.30589	6.2329
Denr_ENSMUST00000023869	6.7227	6.57319	6.70243	6.58494	6.56919	6.53187	6.51951	6.65635	6.56288	6.37719	6.61391	6.33143	6.34227	6.32023	6.26968
Prmt5_ENSMUST00000023873	8.40613	8.48053	8.48844	8.45692	8.3891	8.37413	8.36856	8.46532	8.46833	8.18075	8.40397	8.33988	8.21343	8.26385	8.32213
Sympk_ENSMUST00000023882	7.27206	7.48285	7.26724	7.48942	7.33229	7.2426	7.47928	7.20604	7.36283	7.64914	7.3352	7.60755	7.23745	7.6258	7.48045
Nagpa_ENSMUST00000023911	3.67559	3.72461	3.57835	3.77954	3.4939	3.73578	3.91994	3.71775	3.51212	3.90211	3.45075	3.81412	3.7459	4.11345	3.8791
Wrb_ENSMUST00000023913	4.45116	4.38427	4.22263	4.21326	4.56813	4.91548	4.67308	4.33121	4.16562	4.83987	5.07565	4.87605	4.76636	4.54324	4.92594
Ivns1abp_ENSMUST00000023918	7.01936	7.09519	7.30324	7.34788	7.30701	6.95712	6.995	6.97796	7.08469	7.2131	7.03698	7.18335	7.1852	7.30229	7.225
Krt8_ENSMUST00000023952	4.99915	5.40833	5.35016	5.39606	5.28969	4.5191	5.0086	5.18278	5.6514	5.45683	4.53195	5.25735	4.63898	4.94969	4.44193
Serping1_ENSMUST00000023994	2.23036	2.50686	2.11624	2.36222	3.05781	3.25035	2.78515	2.68028	2.77516	3.55593	3.48081	2.93543	4.08694	3.75652	3.24574
Kcnk5_ENSMUST00000024011	6.77309	6.72025	6.34546	6.23959	6.46334	6.79231	6.71369	6.52511	6.6237	6.91249	6.67369	6.72606	6.81137	6.80933	6.96182
Acy1_ENSMUST00000024031	5.55893	5.69824	5.48167	5.56028	5.17701	6.04983	6.06329	5.60561	5.58251	6.21374	6.06329	6.30165	6.06783	6.03737	6.26688
Creld2_ENSMUST00000024042	6.54895	6.4352	6.22092	6.19158	6.56706	6.39874	6.28983	6.2504	6.16438	6.20077	6.41033	6.14278	6.2961	6.18259	6.3721
Twf2_ENSMUST00000024047	7.3972	7.26893	7.08179	7.05209	7.24979	7.6069	7.44439	7.32818	7.23636	7.41195	7.5595	7.33511	7.25445	7.2098	7.47198
March5_ENSMUST00000024078	6.26463	6.15912	6.35172	6.41048	6.2987	6.57913	6.41526	5.95853	6.10357	6.18241	6.22297	6.28957	6.2961	6.42215	6.32449
Trip6_ENSMUST00000024119	4.72762	4.63475	4.79155	4.51377	4.45301	5.2742	5.10111	4.92954	4.73897	4.88599	5.43164	5.04373	4.8834	4.76912	4.94705
Agap3_ENSMUST00000024123	4.20234	4.41914	4.4024	4.50552	4.37731	3.52479	4.09812	4.46944	4.58437	4.01314	4.04077	4.32108	3.85183	4.22741	4.18187
Stk31_ENSMUST00000024171	5.85004	5.93048	5.8917	6.15779	5.84423	5.13229	5.56678	5.60561	5.70696	5.35277	5.09522	5.5178	5.19656	5.64473	5.31504
Nfatc4_ENSMUST00000024179	4.63844	4.5109	4.28944	4.50552	4.60178	4.31089	4.07398	4.78403	4.71883	4.45027	3.91432	4.0036	4.28904	4.15245	4.26268
Tulp2_ENSMUST00000024233	2.83735	2.57028	2.22946	2.43348	2.04563	2.41875	1.96659	2.57531	2.48854	2.85651	2.30716	2.66305	2.86454	2.52849	2.48587
Pcbp4_ENSMUST00000024260	5.07527	5.03394	4.71585	5.02711	5.00534	5.29433	5.39712	5.00221	5.10745	5.41251	5.26028	5.33585	4.77985	4.95705	5.40426
Cdca3_ENSMUST00000024270	6.74424	6.59432	6.40089	6.37246	6.65784	6.69724	6.4833	6.60728	6.4736	6.52191	6.69307	6.53965	6.80809	6.66172	6.37988
Mrps23_ENSMUST00000024486	5.70983	5.50077	5.68393	5.65276	5.4507	5.5941	5.29637	5.57871	5.41328	5.34807	5.63244	5.06515	5.55913	5.37484	5.19663
Acbd4_ENSMUST00000024492	2.39781	1.70355	2.22946	2.03572	1.7777	1.29099	1.54279	2.13279	1.70866	1.76075	2.09035	1.44066	1.78654	1.46795	1.92948
Rhebl1_ENSMUST00000024518	5.2928	5.29557	5.39938	5.18514	5.23177	5.08685	5.04632	5.35914	5.26845	5.01611	4.99464	4.93154	5.02601	5.10354	4.94005
Serac1_ENSMUST00000024570	3.85904	4.31189	4.13816	4.43782	4.47133	3.61292	4.11005	3.83607	4.59913	4.10514	3.38869	4.14446	3.87714	4.43142	3.92239
Rps6ka2_ENSMUST00000024575	3.88747	4.03675	3.70121	4.05279	4.15734	3.97073	4.51166	3.88081	4.08403	4.79223	3.99984	4.35627	4.21156	4.26348	4.67068
Agpat4_ENSMUST00000024594	4.48876	4.99402	4.65635	4.78976	4.85996	5.08685	5.38245	4.85301	5.12285	5.31955	4.94159	5.26971	5.14539	5.18102	5.51208
Igf2r_ENSMUST00000024599	9.18258	9.41712	9.11187	9.24161	9.27624	8.95422	9.2488	9.15146	9.33265	9.11675	8.77078	9.03312	8.86098	8.90305	9.20305
Riok2_ENSMUST00000024620	7.81486	7.9511	7.96353	8.0749	7.96429	7.95974	8.11929	7.86071	7.93966	7.8985	7.99138	7.98732	7.95275	8.0856	7.98455
Chd1_ENSMUST00000024627	7.77737	7.80303	7.99589	7.98511	7.92993	7.88095	7.90334	8.03907	8.03501	7.93891	7.93686	7.86743	7.85741	7.80372	7.96225
Fgfr1op_ENSMUST00000024636	5.14168	4.76922	5.07518	4.8561	5.06083	5.31418	5.17108	5.26102	5.33168	5.06847	5.20733	5.11394	5.29375	5.02866	5.13664
Phf10_ENSMUST00000024657	6.37164	6.28261	6.2175	6.26423	6.42626	6.61692	6.41044	6.26313	6.22986	6.486	6.52295	6.42279	6.40886	6.31165	6.46772
Mmp25_ENSMUST00000024696	3.34754	3.66775	2.94448	3.42476	3.05781	2.83988	3.12775	3.5056	3.64608	3.32673	2.98942	3.05448	2.52351	2.56749	3.05147
Tnfrsf12a_ENSMUST00000024698	4.10886	4.02548	3.75892	3.95931	3.75544	3.67565	3.47986	4.24827	4.03059	3.82304	3.82341	3.67239	3.57081	3.4367	3.8193
Cldn6_ENSMUST00000024699	5.05034	5.16812	4.67646	4.39383	4.97997	5.36583	5.2378	5.58548	5.51796	5.35277	5.45454	5.42693	4.43253	4.21518	5.4144
Pkmyt1_ENSMUST00000024701	5.58085	5.44264	5.22605	5.23087	5.28969	5.37215	5.05251	5.48764	5.52956	5.63329	5.18924	5.16114	5.32167	5.31881	5.22572
Flywch2_ENSMUST00000024704	3.12685	2.92594	2.56762	2.85286	2.42977	2.15081	2.45202	2.33924	2.48854	1.70304	0.581337	1.44066	1.42397	2.06659	1.30145
Pla2g7_ENSMUST00000024706	3.42716	3.25029	3.3719	3.44214	3.51172	4.00371	4.36016	3.64181	3.72894	4.24315	4.08057	4.0616	3.90202	3.87005	4.2286
Tnfrsf21_ENSMUST00000024708	4.17953	4.08097	4.10886	4.05279	4.35774	4.57502	4.38981	4.04706	4.24284	4.63907	4.22963	4.23547	4.39797	4.26348	4.67068
Cd2ap_ENSMUST00000024709	6.70684	6.65592	6.70488	6.7032	6.70118	6.85916	6.70389	6.84598	6.77435	6.84238	6.70903	6.61422	6.73383	6.66172	6.87452
Tbc1d5_ENSMUST00000024717	4.75874	4.7488	4.91516	4.90079	4.64277	3.35628	3.58611	4.62218	4.71883	4.15979	4.04077	4.21005	3.68986	3.77329	4.03184
Cdc5l_ENSMUST00000024727	6.69683	6.51595	6.67271	6.55928	6.53911	6.43244	6.17817	6.44544	6.36553	5.9907	6.5796	6.19231	6.65553	6.51234	6.04984
Spats1_ENSMUST00000024731	1.41744	1.64583	1.85909	0.916421	1.71758	2.26402	2.2076	1.97667	1.59545	2.01906	2.23845	2.06869	1.42397	1.09355	1.87176
Aars2_ENSMUST00000024733	5.50948	5.83687	5.31211	5.54427	5.71566	5.38473	5.82367	5.15573	5.65846	5.74475	5.46961	5.96042	5.51949	5.95522	5.93829
Mrpl14_ENSMUST00000024734	4.98607	4.7488	4.98131	4.78295	4.72904	5.1173	5.05868	4.8642	4.97226	5.10235	5.40837	4.94701	5.19656	5.02866	4.99514
Sgo1_ENSMUST00000024736	6.02657	6.19729	6.12175	6.29804	6.35405	6.01386	6.25804	6.18946	6.50136	6.24946	6.06825	6.47975	6.2914	6.45111	6.26127
Hsp90ab1_ENSMUST00000024739	11.8419	11.7834	12.076	11.847	11.8215	12.2888	12.0566	12.2283	11.83	12.0509	12.4036	12.2085	12.4157	12.1445	12.14
Gtpbp2_ENSMUST00000024748	1.8227	2.05349	2.11624	1.67315	1.7777	2.15081	2.37506	1.60228	2.08927	2.49772	1.92529	1.68167	-0.160992	2.01109	1.98497
Polh_ENSMUST00000024749	3.87332	4.05903	4.06378	4.41159	4.25574	3.95396	4.07398	4.08579	4.09448	3.97707	3.95771	4.15782	4.08694	3.9161	3.9081
Enpp4_ENSMUST00000024757	3.78542	3.99113	3.88524	3.79315	4.00219	3.77451	4.16823	4.04706	3.9751	4.38754	3.86958	4.32108	4.44951	4.61944	4.31775
Fbxl17_ENSMUST00000024761	3.64262	3.65318	3.51276	3.19799	3.58084	3.56953	3.87872	3.41725	3.44835	3.53954	3.72639	4.03289	3.4746	3.9161	3.70826
Mrps18a_ENSMUST00000024763	5.653	5.57995	5.75656	5.61495	5.48717	5.80523	5.66299	5.64505	5.60096	5.48707	5.80274	5.59839	5.46211	5.38033	5.50735
Rrp36_ENSMUST00000024766	5.04404	4.86717	4.93199	4.71308	4.92121	5.26742	5.2159	5.13741	4.92619	5.11347	5.11452	5.08626	4.72514	4.85042	5.19074
Med20_ENSMUST00000024778	2.61738	2.74537	2.84138	2.6283	2.90445	3.10596	3.12775	2.82467	2.89961	2.62749	3.07072	3.38495	2.64636	2.71371	2.73279
Pgc_ENSMUST00000024782	3.32693	3.06455	3.21578	3.17738	2.90445	2.94549	2.62818	2.95591	3.16065	3.60403	2.94699	2.77131	3.14018	2.78161	2.82691
Bysl_ENSMUST00000024783	7.36975	7.16619	7.26889	7.16238	7.16228	7.38081	7.26272	7.12235	7.0367	7.17645	7.27643	7.19798	7.32052	7.11756	7.20907
Ppil1_ENSMUST00000024802	6.79389	6.70972	6.68765	6.58885	6.60697	6.92089	6.83539	6.48944	6.63627	6.81369	6.89073	6.85877	6.76467	6.66172	6.81643
Cpne5_ENSMUST00000024805	2.92223	2.79931	2.84138	3.23835	2.93117	3.54733	3.19646	2.99714	3.16065	3.72495	3.14768	3.16445	3.44104	3.28118	3.62337
Pim1_ENSMUST00000024811	7.19027	6.97437	7.29025	7.20246	7.29034	7.30015	7.1618	7.36604	7.25045	7.15105	7.39561	7.23626	7.37927	7.20053	7.16169
Cmtr1_ENSMUST00000024816	2.83735	2.60098	2.56762	2.36222	2.60593	2.72593	2.37506	2.40198	2.5199	2.46337	2.43549	2.27891	2.52351	2.74806	2.63209
Abcg1_ENSMUST00000024829	4.93931	5.31884	4.30243	4.65463	4.81762	4.9749	5.51839	5.02232	5.23104	5.62942	4.89771	5.30616	4.89584	5.21211	5.4444
Rsph1_ENSMUST00000024832	1.69984	1.64583	1.35952	1.26789	1.37244	1.82151	1.47064	1.37095	1.65317	1.70304	1.83509	1.35046	1.11912	1.83052	0.900909
Sik1_ENSMUST00000024839	7.12163	7.49004	7.59363	7.81958	7.90992	6.8433	7.17179	7.19943	7.57926	7.1857	6.75895	7.19474	7.27364	7.34218	7.28427
Arhgap28_ENSMUST00000024840	4.04719	4.13441	3.90241	4.29206	4.26628	4.01992	4.37011	3.64181	4.22392	4.09395	3.86958	4.13098	4.36257	4.46279	4.18187
Ndc80_ENSMUST00000024851	7.28681	7.13899	7.02999	6.98992	6.91871	7.35229	7.27071	7.15914	7.15754	7.15105	7.3124	7.21724	7.25445	7.12738	7.10802
Clip4_ENSMUST00000024854	2.89449	3.15007	2.91093	3.47629	3.21827	1.89366	2.52509	2.91348	2.85111	2.95869	2.1663	2.46236	2.96239	3.28118	2.23433
Ehd3_ENSMUST00000024860	2.27408	2.77259	2.11624	2.53417	2.14027	1.17996	2.16251	2.05684	2.35578	2.1107	1.40446	1.75382	1.55521	2.17156	1.6146
Spast_ENSMUST00000024869	5.68169	5.42987	5.23963	5.49098	5.4507	5.69849	5.65894	5.35122	5.5487	5.63715	5.76659	5.71142	5.49518	5.46537	5.70207
Slc30a6_ENSMUST00000024870	5.53217	5.65501	5.45282	5.4868	5.52274	5.56124	5.6094	5.48039	5.63	5.79741	5.63912	5.79928	5.55913	5.66285	5.75091
Yipf4_ENSMUST00000024873	6.02976	5.95445	5.88308	5.76061	5.77954	6.10406	5.77582	5.85582	5.90407	5.80772	5.98681	5.76913	6.17886	5.85634	5.76286
Ttc27_ENSMUST00000024882	6.85455	7.15976	6.73396	7.08289	7.03566	7.11825	7.50885	6.83749	7.11453	7.50987	7.10851	7.42624	6.9873	7.28776	7.48045
Eif2ak2_ENSMUST00000024884	5.27138	5.25271	5.26641	5.49931	5.44144	5.62622	5.42603	5.26102	5.31836	5.35277	5.2775	5.34171	5.49518	5.50608	5.24857
Cebpz_ENSMUST00000024885	8.20904	8.28172	8.35367	8.40744	8.28549	8.14574	8.29147	8.23379	8.36201	8.27227	8.30664	8.35083	8.24658	8.34464	8.256
Ndufaf7_ENSMUST00000024887	5.22201	5.26714	5.15617	5.28485	5.19916	5.26742	5.2159	5.31091	5.47859	5.56203	5.41617	5.37641	5.57468	5.50608	5.42447
Vapa_ENSMUST00000024897	8.39997	8.18816	8.31892	8.23866	8.26595	8.53364	8.23814	8.4234	8.26932	8.205	8.56258	8.33254	8.4916	8.26014	8.26513
Prss41_ENSMUST00000024926	2.31651	2.13965	1.78694	1.94108	1.44839	1.05967	1.47064	2.20494	1.81363	1.21761	1.12882	1.44066	1.55521	1.46795	1.30145
Tedc2_ENSMUST00000024930	3.72369	3.68218	3.4204	3.80663	3.63059	4.12856	3.73213	3.66757	3.84493	3.58817	4.06081	3.74499	3.63157	4.01815	4.03184
Atp6v0c_ENSMUST00000024932	8.3201	8.25663	8.23836	8.06512	8.13991	8.56643	8.3611	8.35865	8.17458	8.21535	8.44933	8.28919	8.42021	8.29613	8.39436
Epas1_ENSMUST00000024954	5.68979	5.61044	5.73755	5.63776	5.58715	5.52195	5.36265	5.56507	5.42161	4.95561	5.22519	5.16114	5.69343	5.42878	5.25987
Pigf_ENSMUST00000024957	5.611	5.55664	5.60744	5.51582	5.48266	5.4218	5.39225	5.5582	5.46657	5.4785	5.46961	5.39345	5.73556	5.56508	5.34186
Cript_ENSMUST00000024959	4.8337	4.73503	4.80987	4.61686	4.37731	5.10975	4.70487	4.88631	4.61374	4.59215	4.91982	4.81833	4.51547	4.76073	4.54707
Mcfd2_ENSMUST00000024963	4.75874	4.59718	4.34074	4.40274	4.4804	4.68076	3.97314	4.45472	4.68465	4.39667	4.41228	4.27278	4.63898	4.23953	4.15792
Msh2_ENSMUST00000024967	9.77773	9.74053	9.68222	9.61865	9.58361	9.8858	9.83101	9.82127	9.70536	9.80782	9.89544	9.82972	9.72623	9.65566	9.74401
Meiob_ENSMUST00000024972	2.27408	2.0084	2.65128	2.90393	2.39181	1.89366	2.29376	3.35518	2.85111	2.56406	2.71379	2.73612	2.70408	2.56749	2.23433
Nme3_ENSMUST00000024978	3.81532	3.65318	3.83245	3.54226	3.70988	3.84899	3.68508	3.53389	3.78164	4.02497	4.24722	4.14446	4.21156	3.946	3.83448
Jpt2_ENSMUST00000024981	5.73351	5.52097	5.67396	5.722	5.54885	5.83302	5.86295	5.88356	5.61918	5.74832	6.01789	5.8821	5.97123	5.8405	5.71853
Ift140_ENSMUST00000024983	5.24416	5.62545	5.5322	5.68597	5.54885	4.88925	5.34763	5.26945	5.59729	5.61776	5.15236	5.59839	5.33999	5.55541	5.55855
Nme4_ENSMUST00000025007	5.26598	5.23325	5.2927	5.1591	5.33041	5.26062	5.14234	5.39042	5.25454	5.05699	4.98419	4.90802	5.21653	5.0835	5.14884
Tmem8_ENSMUST00000025010	3.90148	3.97949	4.07896	3.98325	4.32789	2.83988	3.28327	3.74221	4.33389	3.60403	2.49561	3.19068	2.3892	3.08013	3.31234
Mrpl28_ENSMUST00000025014	6.60352	6.49771	6.57701	6.59274	6.52383	6.39874	6.31838	6.50381	6.4736	6.2368	6.31761	6.14614	6.40016	6.34007	6.05633
Arhgdig_ENSMUST00000025019	2.18527	2.25994	2.33442	2.20819	2.79234	1.74556	1.6115	2.05684	2.20956	2.19685	1.63578	1.88812	1.42397	1.69622	2.52384
Dusp1_ENSMUST00000025025	5.2108	5.34627	5.4702	5.35994	5.42273	4.94973	5.08308	5.25253	5.42576	4.94941	5.0458	4.73166	4.89584	4.72668	5.08678
Cuta_ENSMUST00000025027	5.26598	4.9707	4.99739	5.02134	4.71373	5.52763	5.19926	5.1648	5.00588	5.20986	5.43932	5.26355	5.42826	5.1233	5.21415
Kdm4b_ENSMUST00000025036	4.92566	5.09452	4.88091	5.04996	5.78687	5.40338	5.40198	5.10006	5.23104	5.37604	5.09522	5.52812	5.05956	5.25455	5.38376
Uqcc2_ENSMUST00000025045	6.06441	5.92443	5.94655	5.7744	5.76104	5.80055	5.49585	5.95853	5.95659	5.62555	5.82048	5.52812	5.6719	5.65382	5.4444
Acsbg3_ENSMUST00000025048	3.34754	3.26953	2.80532	3.31583	3.3429	3.43092	3.71662	2.95591	3.21915	3.68078	3.42006	3.79715	3.00893	3.18416	3.72466
Mllt1_ENSMUST00000025053	4.02177	4.19603	3.90241	3.92263	4.12299	3.88483	3.68508	4.10478	3.99755	3.88923	4.08057	3.53582	3.82607	3.85437	3.83448
Nudt12_ENSMUST00000025065	1.76258	1.75904	2.38418	2.74494	2.50284	2.80289	2.84345	1.37095	1.7621	2.90851	2.98942	2.96612	2.16094	2.78161	2.88641
Bambi_ENSMUST00000025075	3.40766	3.60855	2.91093	2.82662	3.3429	3.71601	3.08005	2.62875	3.18041	3.32673	3.18468	3.33878	3.4746	3.30445	3.31234
Mtpap_ENSMUST00000025077	6.03612	6.09856	6.03097	5.99065	6.1784	6.00167	6.22826	5.92687	6.16438	6.03231	5.67856	6.02744	5.84222	6.05119	6.07244
Zeb1_ENSMUST00000025081	3.81532	3.04235	4.37805	4.09736	3.97677	3.19431	3.34511	3.81317	3.86949	3.34572	3.99984	3.16445	4.34454	4.23953	3.47622
Kif5b_ENSMUST00000025083	8.52229	8.80488	8.75035	8.83137	8.81247	8.51374	8.71929	8.76886	8.79192	8.63353	8.45312	8.61574	8.67235	8.75362	8.72593
Map4k3_ENSMUST00000025089	5.1824	5.32345	5.25308	5.6034	5.44144	5.40338	5.68707	5.29447	5.55628	5.88761	5.39265	5.49693	5.47874	5.872	5.89186
Thumpd2_ENSMUST00000025093	3.52087	3.66775	3.51276	3.49307	3.43911	3.2226	3.36514	3.32312	3.46456	3.61971	3.32384	3.63467	3.60151	3.49854	3.69168
Cox7a2l_ENSMUST00000025095	6.35901	6.07415	6.42486	6.31936	6.18119	6.33862	6.03542	6.0834	6.12922	6.04978	6.05832	5.92179	6.16864	6.09855	5.86623
Dync2li1_ENSMUST00000025101	4.00889	4.12388	3.75892	3.89764	3.78504	3.54733	3.77769	4.16027	4.35143	4.19162	4.19378	4.18417	3.92647	4.13957	3.97815
Polr2d_ENSMUST00000025106	5.81347	5.62918	5.77533	5.75367	5.52712	5.91331	5.7379	5.73309	5.61192	5.60206	5.84379	5.80778	6.189	5.85634	5.75091
Sap130_ENSMUST00000025109	7.14389	7.17387	7.13725	7.22272	7.28258	7.19877	7.16894	7.14316	7.21855	7.30204	7.14885	7.21405	7.23255	7.33514	7.32516
Mapre2_ENSMUST00000025127	5.19383	5.40399	5.23963	5.35536	5.34041	5.08685	5.30677	5.18278	5.45445	5.24061	5.39265	5.41029	5.09235	5.16839	5.23147
Thoc1_ENSMUST00000025137	7.13651	7.17259	7.18891	7.29386	7.03566	7.36345	7.46078	7.04829	7.22451	7.20792	7.19944	7.35699	7.02742	7.08098	7.22356
Esco1_ENSMUST00000025142	3.67559	3.432	3.49022	3.68049	3.52931	3.95396	4.01178	3.07621	3.51212	4.01314	3.38869	3.89611	3.77312	3.75652	3.83448
Tapbp_ENSMUST00000025161	5.19951	5.01697	4.89814	4.88816	5.31019	4.74067	4.63232	5.20054	4.86644	4.93695	4.75741	4.58114	4.56303	4.47309	4.89005
Pfdn6_ENSMUST00000025163	6.82546	6.67948	6.84027	6.60244	6.62753	7.09165	6.86911	6.64991	6.60919	6.69473	7.02937	6.87706	6.90663	6.66846	6.79912
Cdh2_ENSMUST00000025166	3.77023	3.56251	3.91939	3.79315	4.02717	4.70101	4.46601	3.81317	3.71545	4.12725	4.47335	4.17105	3.7459	4.07338	4.43198
Wdr46_ENSMUST00000025170	6.82912	6.93425	6.78115	6.90941	6.81673	6.94867	7.08535	6.48583	6.7481	6.90451	6.79528	6.97841	6.73036	6.8846	6.93565
Vps52_ENSMUST00000025178	5.98442	6.00983	5.83021	5.90236	5.90614	5.56677	5.95176	5.51628	5.75388	5.78007	5.80868	5.87402	5.75617	5.77954	5.85511
H2-K1_ENSMUST00000025181	5.28213	5.3508	5.31852	5.20055	5.56173	4.01992	3.61986	5.1466	5.24049	4.23299	3.79976	4.0036	4.28904	4.03215	4.43198
Ring1_ENSMUST00000025183	3.96954	3.81903	3.98535	3.80663	3.6468	3.61292	3.71662	3.53389	3.70184	3.63522	3.97893	3.57618	3.90202	4.01815	3.22284
Brd2_ENSMUST00000025193	7.66486	7.49107	7.55614	7.63067	7.65634	7.77272	7.721	7.40677	7.4989	7.47473	7.78101	7.67064	7.49824	7.63616	7.70672
Tap2_ENSMUST00000025197	2.94946	3.30725	2.65128	2.85286	2.98317	1.39408	1.39469	3.15117	3.14061	2.31715	0.96836	1.60572	1.55521	1.62407	1.6146
Pfdn1_ENSMUST00000025204	6.64574	6.59813	6.74352	6.53519	6.477	6.81106	6.68209	6.63039	6.53437	6.6477	6.97498	6.59471	6.90663	6.73206	6.47016
Dnajc18_ENSMUST00000025208	4.12088	4.03675	4.00138	4.18256	3.82832	4.20144	3.90633	4.04706	3.98637	4.02497	4.33211	4.10363	4.04288	3.93112	3.86438
Spata24_ENSMUST00000025209	2.68372	2.37097	2.28289	2.65835	2.87723	2.46684	1.67709	2.13279	2.42369	2.39211	2.43549	2.01098	3.09774	2.64245	2.18779
Sil1_ENSMUST00000025215	5.14168	5.03394	4.88091	4.96833	4.97997	4.50765	4.51166	5.05196	4.97792	5.01611	4.65568	4.41307	5.03728	4.86614	4.6102
Hspa9_ENSMUST00000025217	10.5178	10.594	10.6304	10.5862	10.65	10.7708	10.7344	10.6645	10.586	10.6644	10.7167	10.7221	10.758	10.7296	10.8241
Etf1_ENSMUST00000025218	8.97182	8.90745	9.05252	9.05932	9.00867	9.17386	9.12169	8.99237	8.96463	9.04779	9.23322	9.14676	9.26257	9.11325	9.11484
Epb41l4a_ENSMUST00000025234	5.02497	5.42129	5.3564	5.59177	5.69632	5.39719	5.62195	5.08101	5.60462	5.57818	5.22519	5.50218	5.55913	5.73741	5.71443
Stard4_ENSMUST00000025236	4.86262	4.66412	4.96506	4.96833	4.92786	4.58595	4.62403	5.13741	4.97792	4.55185	4.93075	4.49955	5.01465	4.8583	4.8307
Ercc3_ENSMUST00000025241	5.92052	6.15912	6.06568	6.13392	6.20602	5.95606	6.30288	5.91617	6.07746	5.99672	5.98156	6.1858	5.92344	6.28265	6.15641
Iws1_ENSMUST00000025243	7.11262	6.96997	7.2132	7.18321	7.0014	7.25121	7.08836	7.21917	7.02309	7.0198	7.18582	7.1453	7.25686	7.01551	7.04903
Bag6_ENSMUST00000025250	9.05915	9.0554	9.18431	9.05897	8.96004	9.10951	9.06233	9.13885	9.00571	9.05825	9.06546	9.00059	9.17663	9.02976	9.09093
Prrc2a_ENSMUST00000025253	8.57294	8.46862	8.46551	8.44295	8.40467	8.49791	8.2993	8.32969	8.36634	8.28093	8.46914	8.33033	8.47822	8.45078	8.47592
Wdr33_ENSMUST00000025264	7.65868	8.02371	7.71889	8.09083	8.09631	7.7104	8.02168	7.65716	7.96124	8.07524	7.69868	8.0096	7.73642	8.00799	8.06239
Riok3_ENSMUST00000025270	7.16	7.13244	7.15169	7.19735	6.98874	7.43772	7.37938	7.05318	7.05153	7.29839	7.29135	7.21565	7.3881	7.2236	7.24218
Pou5f1_ENSMUST00000025271	8.85926	8.76477	8.94939	8.76083	8.85626	8.98241	8.7928	8.88185	8.68875	8.74229	8.88055	8.81438	8.94791	8.83727	8.85998
Rmc1_ENSMUST00000025276	5.75295	6.04375	5.90455	5.91797	5.80142	5.53328	5.7302	5.77517	5.88913	5.54981	5.49192	5.57369	5.62784	5.61712	5.77078
Mrpl27_ENSMUST00000025278	5.34498	5.13179	5.36881	5.25073	4.96712	5.499	5.25938	5.13741	5.24049	5.01611	5.31135	5.29411	5.33999	5.18729	4.84577
Npc1_ENSMUST00000025279	6.77118	6.78183	6.62953	6.50035	6.79325	7.06846	7.10782	6.75578	6.76456	7.00495	6.96438	6.84645	6.75787	6.78265	7.15263
Impact_ENSMUST00000025290	6.91966	6.83283	7.21492	7.0535	6.74889	8.54908	8.37042	7.13856	6.99825	7.42428	7.56477	7.43038	7.15448	7.09939	7.50201
Dhx16_ENSMUST00000025292	7.31324	7.35924	7.50083	7.47682	7.38276	8.00829	8.13688	7.43517	7.55202	7.85112	7.91363	8.06116	7.98803	7.98207	7.85464
Ndfip1_ENSMUST00000025293	7.36723	6.94326	7.3431	7.05914	7.11936	6.80406	6.67809	7.3621	7.06356	6.76693	6.98811	6.62869	7.17504	6.8415	6.65259
Spry4_ENSMUST00000025295	7.92524	7.73113	8.07755	7.9925	7.95293	7.14621	6.86735	7.61805	7.50577	6.93303	7.24831	7.10965	7.52851	7.39733	6.98922
Mrps18b_ENSMUST00000025305	7.45295	7.21662	7.12633	7.0898	6.99825	7.55639	7.35077	7.11301	7.0121	7.10444	7.56301	7.33217	7.27364	6.9543	7.02772
Dele1_ENSMUST00000025314	5.45354	5.33719	5.39938	5.38262	5.55745	5.42789	5.14234	5.61888	5.54489	5.38524	5.07565	5.07926	5.57468	5.33585	5.4144
Rpp21_ENSMUST00000025319	4.70384	4.39307	4.62566	4.53822	4.44376	4.44899	4.24593	4.34724	4.46858	4.24315	4.42779	3.88008	4.08694	4.41013	3.97815
Gabbr1_ENSMUST00000025338	3.91535	3.96776	3.79616	3.81999	3.92454	3.65504	3.42364	3.74221	3.92911	3.65057	3.48081	3.38495	3.79984	3.78988	3.64076
Dcp2_ENSMUST00000025350	5.82086	5.76753	5.80303	5.64528	5.73474	5.85125	5.85235	5.48764	5.6967	5.59414	5.96038	5.85775	6.04008	6.18259	5.62992
Pggt1b_ENSMUST00000025354	5.10583	5.00554	4.98937	5.1001	5.08483	4.82612	5.17108	4.91885	4.79131	4.8989	4.74508	4.98498	5.02601	5.01462	4.90451
Ap3s1_ENSMUST00000025357	4.49801	4.26474	4.46154	4.19287	4.27673	4.38785	4.39955	4.73613	4.56946	4.45027	4.70745	4.62989	4.83255	4.57229	4.57447
Hbegf_ENSMUST00000025363	4.85545	4.72112	5.02901	4.95022	4.79598	4.12856	4.09812	4.55475	4.56946	4.24315	4.04077	3.91197	5.0032	4.78575	4.0186
Yipf5_ENSMUST00000025364	6.91103	6.76499	6.70733	6.56326	6.62549	7.0626	6.84255	6.8261	6.67161	6.82219	7.02683	6.86693	7.14409	7.01198	6.94967
Tcerg1_ENSMUST00000025375	8.36565	8.32028	8.37997	8.38683	8.46876	8.6079	8.5491	8.37144	8.36795	8.43456	8.66839	8.47941	8.45529	8.41247	8.4741
Dpysl3_ENSMUST00000025379	5.7873	5.85926	5.27961	5.35536	5.55745	6.36741	6.63128	5.67711	5.74727	5.96023	6.20957	6.34901	5.82282	5.91042	6.17741
Spink1_ENSMUST00000025381	2.04088	1.45739	1.71099	1.26789	1.71758	4.61825	4.41885	1.49125	1.33829	4.03669	4.50295	4.40189	3.87714	3.37209	4.3069
Hsd17b4_ENSMUST00000025385	7.36217	7.27489	7.48667	7.53062	7.46734	7.22697	7.26005	7.44637	7.46506	7.33091	7.43068	7.34828	7.41859	7.33231	7.31707
Smad4_ENSMUST00000025393	6.76928	6.83767	6.81101	6.8324	6.80594	6.65375	6.62507	6.77369	6.77921	6.58318	6.55862	6.60206	6.55717	6.66397	6.47501
Sec11c_ENSMUST00000025394	3.53891	3.2308	3.18804	2.85286	3.75544	3.84899	3.86472	3.38655	3.09968	3.41924	3.67531	3.57618	3.60151	3.59605	3.8791
Pmaip1_ENSMUST00000025399	4.3729	4.10259	4.46154	4.30161	4.11135	3.30429	3.30418	4.28202	4.14565	3.00719	2.85818	3.19068	4.02034	3.51858	2.76485
Impa2_ENSMUST00000025403	5.82821	5.98095	5.82572	5.91487	5.96227	6.30924	6.23916	6.1351	6.27191	6.4226	6.39067	6.38069	6.30078	6.235	6.42823
Srfbp1_ENSMUST00000025406	6.88306	6.9685	7.02412	7.01045	6.98396	7.05476	7.01099	7.01857	6.9758	6.9393	7.17437	6.94797	7.06094	7.04343	6.92328
Afg3l2_ENSMUST00000025408	7.20446	7.19791	6.95378	7.11033	7.2067	6.91873	7.08081	7.14545	7.12221	7.09886	6.99854	7.05359	7.01892	7.07591	7.18409
Psmg2_ENSMUST00000025418	6.38167	6.49771	6.46009	6.52094	6.57556	6.76612	6.78422	6.45657	6.58158	6.92517	6.78025	6.86693	6.55325	6.76598	6.84858
Ppic_ENSMUST00000025419	6.39905	6.32689	6.34859	6.29086	6.53694	6.29599	6.1668	6.46026	6.28794	6.10095	6.03824	5.99432	6.44316	6.32308	6.26688
Ptpn2_ENSMUST00000025420	6.56003	6.76329	6.63211	6.68141	6.65384	6.48593	6.72923	6.51095	6.69928	6.60501	6.50478	6.66656	6.62971	6.65495	6.60467
Seh1l_ENSMUST00000025421	7.19169	7.45896	7.18891	7.32112	7.42332	7.43016	7.72778	7.40102	7.52426	7.67282	7.39561	7.70517	7.30195	7.51047	7.66803
Cep192_ENSMUST00000025425	7.26801	7.70752	7.30486	7.72422	7.8261	7.01891	7.53562	7.34424	7.8164	8.03341	7.5002	7.97228	7.52651	7.85879	8.02895
Me2_ENSMUST00000025439	6.97535	7.25573	6.81101	7.25995	7.41979	6.92089	7.35077	6.93883	7.28052	7.36387	7.00631	7.34536	6.85979	7.28045	7.36754
Cxxc1_ENSMUST00000025444	4.81161	4.67137	4.66644	4.64715	4.62651	5.06358	4.95672	4.76028	4.75882	4.95561	4.95236	4.79287	4.7932	4.67406	5.16695
Rbfa_ENSMUST00000025462	5.32433	5.58379	5.48167	5.51171	5.67276	5.53892	5.45903	5.38267	5.35795	5.53334	5.43164	5.37068	5.5824	5.66734	5.54477
Pcyox1l_ENSMUST00000025472	5.47243	5.46367	5.10516	5.12184	5.44608	6.00575	6.01654	5.07139	5.16809	5.93539	5.76048	6.05269	5.7832	5.79605	6.07244
Napg_ENSMUST00000025474	5.03136	5.06179	5.06759	5.05562	4.97997	5.19074	4.80362	5.09056	4.96658	4.81284	5.05582	4.84335	4.98002	4.71804	4.82311
Txnl1_ENSMUST00000025476	8.1538	7.97693	8.10191	8.0325	8.00495	8.26785	8.0629	8.12874	7.95336	7.8985	8.2368	8.07355	8.27542	8.06956	7.92815
Nars_ENSMUST00000025483	9.28363	9.29337	9.44826	9.37741	9.29918	9.51034	9.53161	9.4003	9.29999	9.46133	9.47125	9.46118	9.44449	9.41498	9.54664
Fech_ENSMUST00000025484	4.75874	4.61232	4.573	4.91953	4.76661	4.06748	4.53838	4.76028	4.89064	4.31233	4.44314	4.65836	4.30778	4.50357	4.78453
Lmnb1_ENSMUST00000025486	9.64118	9.63926	9.74218	9.56735	9.61536	9.78892	9.69538	9.80431	9.5623	9.52283	9.75107	9.71382	9.82017	9.6565	9.67556
C330018D20Rik_ENSMUST00000025488	2.13873	2.13965	2.38418	2.46783	1.83541	2.09069	2.01813	2.05684	2.5199	1.37373	2.1663	1.68167	1.78654	1.69622	1.21125
Prrc1_ENSMUST00000025490	5.941	5.76074	5.9088	5.81166	5.62447	5.70853	5.50038	5.97409	5.72726	5.90371	5.80274	5.62749	5.84222	6.05806	5.77472
Fbn2_ENSMUST00000025497	5.27677	5.30957	4.9236	4.91953	5.34538	4.03595	3.93343	4.98182	4.93203	3.90211	3.84668	3.91197	4.12968	4.23953	4.26268
Isoc1_ENSMUST00000025503	5.01212	4.97657	4.97321	4.8496	4.92786	5.23307	5.24863	4.81893	5.00588	5.05699	4.96305	5.21325	5.10312	5.17472	5.25423
Dctn4_ENSMUST00000025505	5.86441	6.1252	5.99939	6.19415	5.98795	5.94761	6.25267	5.99967	6.17427	6.21374	6.0076	6.21165	5.9295	6.03737	6.22428
Rbm22_ENSMUST00000025506	7.33534	7.11527	7.39408	7.29026	7.22706	7.32971	7.21659	7.36801	7.21616	7.06203	7.29558	7.13689	7.30428	7.13064	6.93917
Rps14_ENSMUST00000025511	9.45962	9.33305	9.63612	9.34716	9.36588	9.68124	9.42379	9.68285	9.29292	9.42748	9.7503	9.54554	9.70474	9.4263	9.424
Tmx3_ENSMUST00000025515	6.68271	6.60003	6.60875	6.3334	6.44492	6.70728	6.60835	6.64343	6.55155	6.70027	6.55155	6.63108	6.54143	6.57588	6.64399
Gnaq_ENSMUST00000025541	4.5254	4.24544	4.56223	4.43782	4.48942	4.40029	4.1336	4.2986	4.4766	4.3315	4.3966	4.19717	4.57855	4.31021	4.25141
Psat1_ENSMUST00000025542	9.18866	9.05297	9.26454	9.09513	9.07681	9.43791	9.22672	9.21508	9.02223	9.23728	9.45241	9.25755	9.40751	9.22112	9.2872
Cndp2_ENSMUST00000025546	6.94354	6.82147	6.93512	6.91253	6.9353	7.15173	7.13579	6.98566	6.85956	7.16848	7.4249	7.24411	7.22764	7.18023	7.1959
Timm21_ENSMUST00000025547	4.09673	4.02548	3.98535	4.39383	4.4622	3.77451	3.82186	4.08579	4.21436	3.84988	3.48081	4.03289	3.87714	3.57707	3.65793
Anxa1_ENSMUST00000025561	3.19667	2.82554	3.07139	2.6878	3.00848	3.69597	3.24052	3.35518	3.38162	3.40121	3.86958	3.67239	2.75957	2.99688	2.73279
Incenp_ENSMUST00000025562	7.93378	8.11161	7.94603	8.13759	8.20636	7.8909	8.04438	8.00915	8.16964	8.04797	7.89562	8.05224	7.94379	8.15044	8.11075
Fth1_ENSMUST00000025563	6.3437	6.21476	6.0192	6.06827	5.89261	6.4294	6.28458	6.19833	6.04009	6.07843	6.57613	6.39486	6.40886	6.28849	6.10411
Fads2_ENSMUST00000025567	6.67865	6.7768	6.60088	6.64058	6.83983	6.42332	6.47179	6.65635	6.88387	6.74386	6.3627	6.62869	6.51345	6.62522	6.60467
Tmem138_ENSMUST00000025568	4.27945	4.26474	4.10886	4.1512	4.45301	4.2843	3.90633	4.26524	4.06289	3.97707	4.57438	4.04732	4.15059	4.34429	3.95054
Sdhaf2_ENSMUST00000025570	4.5072	4.36651	4.65635	4.40274	4.35774	4.92412	4.58184	4.5821	4.46858	4.42372	4.70745	4.34463	4.32627	4.45241	4.46162
Osbp_ENSMUST00000025590	5.45354	5.76414	5.52113	5.7077	5.9262	5.82382	5.9351	5.67076	5.70013	6.02938	5.65239	5.9296	5.94753	6.08182	6.12279
Rfk_ENSMUST00000025617	5.19383	4.91682	5.16331	4.99213	4.94106	4.75042	4.86823	5.07139	4.84183	4.87296	5.14299	4.74941	5.0815	5.05634	4.91169
Ostf1_ENSMUST00000025631	4.87687	4.87975	4.83693	4.8496	4.90108	5.37845	5.06482	5.05196	5.11773	5.24567	5.36068	5.09323	5.20658	5.18729	5.35245
Carnmt1_ENSMUST00000025632	6.75392	6.72896	6.69506	6.60822	6.67375	7.24087	7.01892	6.85722	6.84879	7.19881	7.37375	7.21884	7.1852	7.0776	7.29666
Ccdc86_ENSMUST00000025639	4.95282	4.76244	5.00536	4.8561	4.71373	5.19074	4.92333	5.10006	4.82309	4.84655	5.36874	5.05804	4.7932	4.48332	4.8078
Prpf19_ENSMUST00000025642	8.62294	8.7117	8.57266	8.51094	8.50312	8.70697	8.85876	8.50694	8.49324	8.54597	8.68058	8.76505	8.62177	8.60047	8.66352
Tmem132a_ENSMUST00000025645	5.23866	5.4885	5.27961	5.25073	5.37973	4.50765	4.6073	5.13741	5.44631	4.94941	4.54623	4.45696	4.54735	4.77746	4.75291
Ddb1_ENSMUST00000025649	10.9295	10.9354	11.048	10.9537	10.9687	11.1212	11.0351	11.1172	10.9468	10.984	11.1165	11.0761	11.0002	10.9119	10.9722
Zfand5_ENSMUST00000025659	6.57759	6.46471	6.39787	6.37019	6.27282	6.57365	6.4438	6.65313	6.61827	6.40913	6.7122	6.47975	6.64083	6.47438	6.53666
Rtn3_ENSMUST00000025667	7.9566	7.8652	7.8036	7.64387	7.81628	8.11212	7.91613	7.96308	7.82034	7.83358	8.12467	7.88762	7.8873	7.70444	7.95793
Atl3_ENSMUST00000025668	6.20093	6.45003	6.13997	6.2764	6.25707	6.37057	6.56786	6.11183	6.19628	6.73489	6.47522	6.71932	6.34227	6.69071	6.63318
Naa40_ENSMUST00000025675	5.66537	5.40833	5.45864	5.50345	5.5095	5.63677	5.65894	5.4731	5.51796	5.46119	5.82048	5.45426	5.65736	5.54568	5.5722
Otub1_ENSMUST00000025679	7.29611	7.22527	7.33995	7.15976	7.03566	7.39952	7.27997	7.17044	7.13872	7.10165	7.34135	7.21724	7.26167	7.12575	7.12973
Cdc42bpg_ENSMUST00000025681	3.91535	4.70708	4.12359	4.54628	4.71373	3.97073	4.46601	4.33121	4.67074	4.69935	3.64908	4.43519	4.06508	4.61944	4.57447
Ehd1_ENSMUST00000025684	7.20305	7.36148	7.33205	7.42531	7.41388	7.30842	7.57809	7.14086	7.39172	7.60057	7.3352	7.63765	7.40343	7.6037	7.60965
Ppp2r5b_ENSMUST00000025695	2.31651	2.50686	2.28289	2.56623	2.53803	2.31746	2.52509	2.40198	2.48854	1.58018	2.01018	2.62509	2.16094	2.56749	2.36558
Ak3_ENSMUST00000025696	4.02177	3.96776	3.64109	3.87222	3.6468	3.61292	3.44262	3.85862	3.78164	3.76781	3.93618	3.65365	3.4746	4.004	3.56994
Snx15_ENSMUST00000025702	3.24141	3.10794	3.18804	3.00095	2.93117	3.2226	3.03073	3.4473	3.19991	3.20727	3.18468	3.38495	3.26047	3.20903	3.35508
Cdca5_ENSMUST00000025704	7.13354	6.9904	7.13362	7.0307	6.94353	7.11636	6.88654	7.24506	6.95444	6.97021	7.05956	6.89112	7.04148	6.85732	6.96527
Zfpl1_ENSMUST00000025707	5.00565	4.87347	4.94033	4.83652	4.66681	5.40955	5.24863	4.81893	4.72558	5.22018	5.16167	4.97747	4.98002	4.77746	5.02192
Tm7sf2_ENSMUST00000025713	3.52087	3.51494	3.57835	3.69506	3.56387	3.30429	3.4044	3.85862	3.75553	3.98919	3.35663	3.63467	4.04288	4.01815	3.9081
Rpp30_ENSMUST00000025714	5.85004	5.94252	5.95068	6.10965	5.83718	5.89585	5.83449	5.79283	5.84648	5.72314	5.74198	5.73389	5.75617	5.84844	5.71853
Frmd8_ENSMUST00000025728	5.611	5.30025	5.62307	5.3916	5.4599	5.26062	5.23236	5.11885	5.41745	5.06847	5.14299	5.16114	5.37595	5.37484	4.92594
Tnks2_ENSMUST00000025729	8.29313	8.4344	8.18321	8.43266	8.3885	8.31048	8.61124	8.24346	8.5245	8.63835	8.38224	8.64212	8.30603	8.51453	8.64211
Uhrf2_ENSMUST00000025739	5.94777	5.85926	5.8874	6.05421	5.97837	5.55012	5.5797	5.9895	5.87101	5.63329	5.60541	5.56368	5.83578	5.70717	5.6558
Rad9a_ENSMUST00000025740	3.96954	3.94401	4.03292	3.98325	4.06385	3.40647	3.94679	4.04706	4.27076	4.2929	3.75126	3.9737	3.7459	3.83851	4.31775
Mrpl21_ENSMUST00000025745	6.46655	6.35868	6.3918	6.44322	6.30382	6.59545	6.38858	6.44544	6.31948	6.39553	6.56915	6.48505	6.40886	6.33726	6.36165
Rps6kb2_ENSMUST00000025749	2.47478	2.40616	1.63082	2.5976	2.42977	2.51338	2.45202	1.70537	2.48854	2.77483	2.76354	2.83921	2.96239	2.8144	3.05147
Ighmbp2_ENSMUST00000025751	4.34241	4.48645	4.42635	4.41159	4.71373	4.22959	4.39955	4.28202	4.81679	4.53541	4.22963	4.36781	3.90202	4.50357	4.60135
Pola2_ENSMUST00000025752	7.08834	7.02901	6.99239	6.98251	6.90361	6.94443	7.02994	6.99077	6.97156	7.06775	6.99854	7.06249	6.76805	6.86125	6.93917
Dmrt1_ENSMUST00000025755	5.941	5.70532	5.95481	5.83487	5.57873	5.89585	5.79441	5.63855	5.36229	5.53334	5.85531	5.53326	5.67911	5.62175	5.29871
Eif1ad_ENSMUST00000025759	5.38042	5.11593	5.10516	5.25073	5.28452	5.61559	5.38736	5.26945	5.20715	5.32912	5.53553	5.47041	5.42826	5.44457	5.43447
Banf1_ENSMUST00000025762	7.15854	7.03464	7.19241	6.9449	6.97436	7.26997	7.05174	7.29344	6.9758	7.02276	7.30401	6.96897	7.11779	6.83752	6.94443
Sf3b2_ENSMUST00000025774	9.17467	8.99889	9.1091	9.00187	8.95882	9.26975	9.02621	9.16565	8.99145	9.0029	9.23377	9.0408	9.17408	9.05699	9.00881
Gldc_ENSMUST00000025778	8.35996	8.82208	8.06902	8.38571	8.62063	8.70884	9.26489	8.57148	8.89007	9.30976	8.64369	9.11501	8.45739	8.82626	9.32566
Cdk2ap2_ENSMUST00000025779	3.32693	3.08641	2.65128	3.11372	2.84949	3.13602	3.21866	3.4473	3.19991	3.12175	3.10972	3.16445	2.96239	3.15885	3.41692
Pacs1_ENSMUST00000025786	4.72762	5.11061	4.68641	4.98622	5.18813	4.57502	4.88914	4.84174	5.01141	5.03961	4.78176	5.1411	4.80644	5.12983	5.06118
Pip5k1b_ENSMUST00000025800	2.31651	2.29791	2.05612	2.24826	2.18536	2.02796	1.85766	1.70537	2.13049	2.59612	1.83509	1.60572	1.78654	2.40476	2.18779
Rab1b_ENSMUST00000025804	6.33598	6.31768	6.35796	6.25934	6.27803	6.28932	6.19506	6.34125	6.28566	6.12313	6.22297	6.08452	5.97123	6.07845	6.08519
Yif1a_ENSMUST00000025811	4.55228	4.58954	4.58368	4.27276	4.65083	4.60757	4.52063	4.62218	4.66374	4.77132	4.73265	4.61059	4.56303	4.60076	4.78453
Cbwd1_ENSMUST00000025815	5.66126	5.71937	5.87875	5.92108	5.69242	5.50477	5.80545	5.88356	5.85879	5.69751	5.75434	5.72045	5.98875	5.75863	5.73481
Rce1_ENSMUST00000025823	5.11788	4.9707	4.90668	4.86257	4.99904	4.66022	4.81094	4.84174	4.92032	5.01017	4.73265	4.9159	4.81956	4.71804	4.77669
Slc29a2_ENSMUST00000025826	4.90496	4.40181	4.49589	4.04143	4.74419	4.54173	4.38981	4.42482	4.13556	4.26325	4.51752	4.42417	3.95052	4.15245	4.60135
Minpp1_ENSMUST00000025827	6.00727	5.92443	5.83469	5.72555	5.84774	5.77689	5.72633	5.79283	5.7373	5.89084	5.71695	5.71594	5.9051	5.80015	5.93829
Cpt1a_ENSMUST00000025835	7.63373	7.96297	8.07281	8.11947	8.10073	6.94018	7.252	7.82824	8.06588	7.59761	7.10851	7.35844	7.59485	7.67907	7.37664
Mrpl11_ENSMUST00000025836	6.35392	6.17195	6.32649	6.17868	6.12733	6.47715	6.16108	6.30066	6.21316	6.17446	6.44885	6.29562	6.43892	6.24405	6.30008
Tesmin_ENSMUST00000025840	3.10281	3.01981	3.3719	3.35306	3.2398	2.64463	2.06788	3.38655	3.23813	2.65818	2.37275	2.06869	2.58624	2.71371	2.08994
Ppp6r3_ENSMUST00000025846	8.0772	8.3116	8.24089	8.42066	8.38246	8.21514	8.51811	8.25837	8.45926	8.48627	8.18867	8.48803	8.16158	8.40307	8.41787
Dpp3_ENSMUST00000025851	7.68827	7.77385	7.70305	7.78423	7.80459	7.89969	7.94886	7.85652	7.84454	8.07524	7.87029	8.01694	7.71377	7.87346	7.99557
Drap1_ENSMUST00000025853	5.3139	4.947	5.08274	5.06126	5.15451	5.40955	5.18241	4.94015	5.07614	5.22018	5.23404	4.99989	5.26527	5.18729	5.24857
Lrp5_ENSMUST00000025856	5.48644	5.92139	5.1985	5.68962	5.896	5.07138	5.47756	5.55129	5.76701	5.9228	5.11452	5.82043	5.28432	5.8405	5.79427
Rnaseh2c_ENSMUST00000025864	4.74326	4.46992	4.73515	4.29206	4.52493	4.44899	4.01178	4.315	4.43607	4.35979	4.15702	4.21005	4.44951	4.38852	4.3069
Rela_ENSMUST00000025867	4.31128	4.35755	4.80987	4.76234	4.64277	4.77928	4.58184	4.56849	4.56194	4.6158	4.602	4.62027	4.84543	4.61013	4.57447
Slc1a1_ENSMUST00000025875	3.24141	3.36204	2.43227	2.6878	2.7629	3.56953	3.79257	2.91348	2.87556	4.03669	3.86958	3.53582	3.29844	3.51858	3.96441
Znrd2_ENSMUST00000025885	6.56224	6.4352	6.3918	6.35191	6.35651	6.5709	6.30806	6.34125	6.2487	6.15037	6.69307	6.39486	6.31474	6.23197	6.40298
Scyl1_ENSMUST00000025890	5.08757	5.52097	5.05996	5.56822	5.62447	4.85352	5.38736	5.19169	5.42576	5.18899	4.94159	5.23862	5.16608	5.26644	5.33119
Arl2_ENSMUST00000025893	5.3501	5.43839	5.42338	5.3916	5.28452	5.45794	5.17108	5.53038	5.56382	5.4785	5.51389	5.50218	5.52751	5.30733	5.29871
Map4k2_ENSMUST00000025897	3.46538	3.51494	3.04069	3.29684	3.47587	3.10596	3.12775	3.25678	3.48059	3.53954	2.55332	3.16445	2.24111	3.13308	3.31234
Prdx5_ENSMUST00000025904	5.39534	5.40833	5.31852	5.61495	5.4599	5.39719	5.10708	5.37487	5.32282	5.13545	5.21629	5.20684	5.24597	5.09689	5.32045
Esrra_ENSMUST00000025906	2.92223	2.53892	2.61006	3.09186	3.08185	3.56953	2.95342	2.40198	2.82623	2.93382	2.71379	2.66305	2.45792	2.2694	2.91526
Bad_ENSMUST00000025910	1.25238	1.31653	1.99339	1.98918	1.65484	1.82151	2.06788	0.934853	1.53533	2.39211	2.1663	1.95086	2.16094	1.62407	2.23433
Plcb3_ENSMUST00000025912	6.76162	7.13899	6.76715	7.08704	7.0372	6.86814	7.06711	6.84033	7.04076	7.33922	6.87666	7.28577	6.93101	7.24631	7.19295
Vegfb_ENSMUST00000025914	2.43681	2.0084	1.9278	2.03572	2.18536	2.02796	2.29376	2.05684	1.81363	2.62749	2.71379	2.54601	1.78654	1.89326	2.66644
Stip1_ENSMUST00000025918	10.0104	9.83233	10.0444	9.84685	9.87002	10.2375	9.97385	10.1329	9.88114	9.94154	10.2728	10.0074	10.1933	9.95556	10.0033
Spindoc_ENSMUST00000025924	5.5186	5.39963	5.31852	5.41379	5.41329	5.40338	5.44968	5.08101	5.26845	5.36212	5.68503	5.31215	5.50333	5.56508	5.36296
Plaat3_ENSMUST00000025925	4.92566	4.72809	5.14178	5.07803	4.98636	4.80757	4.35014	4.8753	4.90258	4.40574	4.61561	4.36781	5.28432	5.13633	4.51915
Smc3_ENSMUST00000025930	8.75175	9.18293	8.86101	9.13108	9.14723	8.89228	9.31693	8.92854	9.23651	9.22067	8.86638	9.26528	8.88145	9.16343	9.20414
Hhex_ENSMUST00000025944	2.23036	1.38868	1.85909	1.73087	1.83541	2.55847	2.16251	1.70537	1.40701	1.86969	2.55332	2.22916	2.9143	2.93858	1.01194
Eif3a_ENSMUST00000025955	10.4131	10.5927	10.5759	10.6674	10.6333	10.5667	10.6769	10.638	10.6426	10.7006	10.4994	10.6817	10.5976	10.6614	10.7232
Fam45a_ENSMUST00000025957	5.2981	5.22834	5.31852	5.39606	5.14883	4.85352	5.31709	5.39814	5.41328	5.17314	5.06577	5.08626	5.29375	5.33585	4.98157
Prdx3_ENSMUST00000025961	6.29678	6.1998	6.37959	6.46252	6.37852	6.40184	6.50829	6.54262	6.39119	6.47311	6.45644	6.46639	6.56887	6.45631	6.66326
Noc3l_ENSMUST00000025963	7.27475	7.21538	7.42709	7.45129	7.30446	7.55361	7.55756	7.21262	7.11196	7.29595	7.49284	7.37283	7.29492	7.27309	7.24076
Hells_ENSMUST00000025965	9.5527	9.71203	9.64763	9.76375	9.67585	9.77883	9.89916	9.67016	9.74053	9.81678	9.80812	9.90715	9.68919	9.79001	9.87349
Aldh18a1_ENSMUST00000025979	7.11112	7.81535	7.31772	7.75062	7.81897	7.03894	7.7034	7.27889	7.67728	7.82684	6.851	7.4989	7.26407	7.65325	7.82833
Tctn3_ENSMUST00000025981	3.59169	3.88287	3.39635	3.72378	3.88409	3.45497	3.76266	4.00726	3.94074	3.66576	3.97893	3.74499	3.97417	3.80627	3.78843
Ccnj_ENSMUST00000025983	2.61738	2.74537	2.65128	2.82662	2.7629	2.20853	2.41405	1.49125	2.63895	2.23807	1.92529	2.327	2.16094	2.78161	2.03841
Tm9sf3_ENSMUST00000025989	7.26936	7.33433	7.03194	7.09117	7.28517	7.14066	7.28261	7.12235	7.21016	7.33566	7.24831	7.39274	7.27364	7.39869	7.48887
Smndc1_ENSMUST00000025997	7.48469	7.28083	7.41517	7.35936	7.28646	7.48228	7.30742	7.44265	7.26093	7.12793	7.46304	7.2488	7.66737	7.40139	7.06199
Mxi1_ENSMUST00000025998	2.54784	3.06455	2.76832	2.5976	3.08185	2.15081	2.78515	2.95591	2.87556	1.64292	2.1663	2.17763	2.64636	2.01109	2.7
Trim8_ENSMUST00000026008	5.56334	5.38206	5.31211	5.43565	5.46905	5.46979	5.43079	5.09056	5.3139	5.54571	5.36874	5.48108	5.40234	5.35269	5.50261
Arl3_ENSMUST00000026009	4.41256	4.41914	4.7542	4.61686	4.47133	4.12856	4.32989	4.67394	4.55439	4.31233	4.62909	4.48902	4.46628	4.53342	4.46162
Sfxn2_ENSMUST00000026011	3.72369	3.7106	3.57835	3.54226	3.6142	4.01992	3.60309	3.83607	3.70184	3.91488	3.93618	3.77997	3.85183	3.77329	3.80395
Maoa_ENSMUST00000026013	5.98442	6.39854	6.08837	6.39718	6.29098	6.30594	6.72536	6.27156	6.45343	6.51983	6.28817	6.74167	6.43466	6.50232	6.68855
Fundc1_ENSMUST00000026016	3.34754	3.06455	3.15975	3.04712	2.87723	3.33052	3.26205	3.35518	3.63179	3.43706	3.51025	3.36205	3.40669	3.34989	3.05147
Taf5_ENSMUST00000026027	5.7873	5.94551	6.03486	6.04001	6.03181	6.25549	6.32351	5.92687	6.10616	6.29168	6.29241	6.2926	6.30078	6.4061	6.39532
Pcgf6_ENSMUST00000026032	6.61844	6.53991	6.70243	6.49827	6.477	6.71974	6.52842	6.76774	6.58715	6.47311	6.69307	6.49034	6.38259	6.32593	6.53898
Nr0b1_ENSMUST00000026036	7.54951	7.79807	7.5246	7.69189	7.92246	7.81397	8.08119	7.65071	7.82427	8.03048	7.84307	8.16734	7.83012	8.04214	8.40267
Gsto1_ENSMUST00000026050	5.46302	5.51292	5.63853	5.71129	5.51834	5.35947	5.34763	5.59222	5.49447	4.89246	4.7201	4.96991	4.93252	4.95705	5.04822
Casp7_ENSMUST00000026062	3.73937	3.76583	3.55682	3.55829	3.19641	3.45497	3.46136	3.18724	3.38162	3.48921	3.45075	3.72718	3.68986	3.23348	2.85697
Vwa2_ENSMUST00000026068	2.61738	3.01981	1.71099	2.20819	2.42977	2.02796	2.56027	1.89178	2.32059	2.39211	1.52475	1.82253	1.78654	2.31595	1.6146
Trub1_ENSMUST00000026073	5.3501	5.18341	5.41143	5.15384	4.98636	5.47568	5.21037	5.36703	5.30492	5.33388	5.30296	5.08626	5.26527	5.23651	5.14275
3110040N11Rik_ENSMUST00000026092	2.43681	2.60098	2.76832	2.32523	2.60593	1.82151	2.16251	2.68028	1.91148	2.42818	2.60882	2.41863	2.16094	2.40476	2.23433
Btbd1_ENSMUST00000026093	5.53666	5.4926	5.57568	5.69688	5.49614	5.03993	4.96331	5.24399	5.41745	4.90531	4.99464	5.03651	5.22641	5.47052	4.98837
P4hb_ENSMUST00000026122	9.58235	9.43852	9.35153	9.23415	9.44767	9.77555	9.53852	9.52709	9.27464	9.52751	9.74412	9.53246	9.59413	9.40189	9.68397
Alyref_ENSMUST00000026125	7.50318	7.43254	7.58568	7.42858	7.38034	7.85182	7.6287	7.58125	7.32781	7.55848	7.63328	7.54156	7.56011	7.37827	7.5818
Ints4_ENSMUST00000026126	7.98236	7.99799	7.96045	7.91292	7.84115	8.09882	8.05058	7.90741	7.86529	7.91289	8.11032	8.10492	8.04358	8.01242	7.95272
Anapc11_ENSMUST00000026128	5.90322	5.7709	5.8744	5.57611	5.59135	5.98112	5.77956	5.80449	5.57879	5.7905	6.10248	6.00545	6.16351	5.88363	5.88823
Pcyt2_ENSMUST00000026129	4.56114	4.5664	4.54045	4.47207	4.72904	4.37531	4.72051	4.37877	4.72558	4.72132	4.7201	4.63944	4.44951	4.81845	4.84577
Aspscr1_ENSMUST00000026135	7.05896	6.86796	6.67521	6.63492	6.57344	7.1388	7.08081	6.8986	6.7027	6.97021	7.1881	6.96517	7.03306	6.89421	6.98071
Lrrc45_ENSMUST00000026139	2.04088	2.25994	2.28289	1.98918	1.71758	2.15081	1.04322	2.4621	1.7621	2.01906	1.40446	2.22916	1.42397	1.62407	1.74891
Maged1_ENSMUST00000026142	8.0933	7.98059	7.98887	7.93304	8.04066	8.35269	8.25435	8.27941	8.20505	8.25794	8.40886	8.26933	8.24658	8.23689	8.29357
Dcxr_ENSMUST00000026144	3.30602	3.10794	3.98535	3.49307	3.42038	3.35628	3.00541	3.41725	3.19991	3.18636	2.94699	3.19068	3.68986	3.78988	3.07723
Arhgap19_ENSMUST00000026150	6.77689	6.69735	6.7648	6.64434	6.54993	6.5709	6.55919	6.80304	6.69241	6.63619	6.57264	6.65011	6.73383	6.57348	6.42322
Zdhhc16_ENSMUST00000026154	3.48411	3.7106	3.26972	3.73792	3.88409	3.93698	3.94679	3.38655	3.63179	4.30265	3.5674	4.04732	3.60151	3.9161	4.21705
Rfng_ENSMUST00000026156	3.17377	3.49873	2.76832	2.9288	2.9574	3.13602	3.12775	2.73003	2.82623	3.20727	3.22075	2.96612	2.58624	3.32735	3.12742
Ogfod3_ENSMUST00000026169	3.85904	3.96776	3.68144	3.89764	4.09963	3.71601	3.44262	4.0273	3.85726	3.79569	3.82341	3.76259	3.00893	3.59605	3.9081
Ubtd1_ENSMUST00000026170	2.61738	2.47407	2.80532	2.77269	2.50284	1.96237	2.16251	2.13279	2.17057	1.64292	2.60882	2.17763	2.07605	2.17156	2.5969
Wdr45b_ENSMUST00000026173	5.52314	5.90917	5.68393	5.96983	5.9655	5.37845	5.90462	5.59893	5.80888	5.6901	5.32798	5.6513	5.45372	5.77538	5.79038
R3hcc1l_ENSMUST00000026188	5.11788	5.13703	5.24637	5.14325	5.2478	5.04786	4.96987	5.12816	5.17304	4.87296	5.08547	4.94701	5.15577	5.06318	5.14275
Got1_ENSMUST00000026196	7.68827	7.69957	7.82965	7.86055	7.87164	8.00218	8.0827	7.81534	7.85303	8.01054	7.99789	7.97417	8.02105	8.11222	7.99049
Cpn1_ENSMUST00000026210	2.23036	2.53892	2.43227	1.98918	2.50284	2.60219	2.52509	2.40198	2.28452	2.98315	2.09035	2.80566	2.45792	2.8144	2.48587
Chuk_ENSMUST00000026217	5.47243	5.8529	5.62307	5.99949	5.82298	5.61559	6.181	5.39814	5.74063	5.92911	5.17092	5.74721	5.72862	6.24405	6.02358
Cwf19l1_ENSMUST00000026218	5.94777	5.92746	5.97118	5.8834	5.9943	6.17091	6.04477	6.02481	5.97368	6.01166	6.06329	6.09149	5.91735	6.03041	6.03677
Scd2_ENSMUST00000026221	7.96829	8.12421	7.90827	7.90275	8.06499	7.96289	7.93636	8.14831	8.0384	8.03779	7.87737	7.98451	8.26826	8.17432	8.03554
Ndufb8_ENSMUST00000026222	7.38603	7.23508	7.36029	7.11304	7.2067	7.2426	7.15174	7.43517	7.30773	7.0763	7.26999	7.10621	7.33885	7.19431	6.95489
Sema4g_ENSMUST00000026225	2.23036	2.92594	2.47881	2.43348	2.8212	1.89366	2.37506	2.62875	2.32059	2.62749	2.23845	2.41863	2.45792	2.71371	2.88641
Twnk_ENSMUST00000026227	4.65507	5.06179	4.86348	5.22586	5.18813	4.40029	4.87523	4.64829	5.15816	5.02791	4.62909	5.16114	4.6537	4.97166	5.27107
Poll_ENSMUST00000026239	3.24141	3.2308	3.10145	3.50965	2.84949	3.0439	3.17392	3.41725	3.29363	3.3075	3.10972	3.21645	3.57081	2.78161	2.85697
Oga_ENSMUST00000026243	8.48963	8.62568	8.63371	8.6862	8.55396	8.35588	8.60546	8.71505	8.70334	8.59934	8.42441	8.52136	8.33029	8.50326	8.50052
Ldb1_ENSMUST00000026252	6.71875	6.91758	6.6802	6.89528	6.97276	6.53187	6.83179	6.82037	6.99127	6.74565	6.47148	6.735	6.42182	6.48714	6.86531
Gbf1_ENSMUST00000026254	5.8751	6.40072	6.05036	6.54125	6.5628	6.14528	6.69204	6.05928	6.57226	6.61483	6.15469	6.74831	6.2914	6.61363	6.76187
Fbxl15_ENSMUST00000026256	2.09063	2.0084	2.61006	1.89133	1.94435	2.31746	1.6115	1.70537	1.40701	1.58018	1.52475	1.52555	1.55521	1.89326	1.38634
Hexa_ENSMUST00000026262	6.10735	6.35643	6.2175	6.40385	6.12154	6.21382	6.49471	6.17607	6.40596	6.52816	5.93889	6.32553	5.86138	6.05463	6.52968
Bbs4_ENSMUST00000026265	3.52087	3.7106	3.95275	3.69506	3.74042	3.88483	4.07398	3.92421	4.13556	3.82304	3.59514	3.95851	3.33543	3.87005	3.89368
Limd1_ENSMUST00000026269	3.36786	3.2308	3.55682	3.13526	3.43911	2.94549	2.69303	3.32312	3.14061	2.74654	3.42006	2.96612	3.26047	2.96802	2.91526
Sacm1l_ENSMUST00000026270	6.12536	6.29908	6.24132	6.20692	6.1417	6.15632	6.24458	6.11183	6.14439	6.08692	6.15469	6.23074	6.16864	6.17629	6.2185
Lztfl1_ENSMUST00000026274	4.3729	3.94401	4.12359	3.79315	4.23445	4.68076	4.49357	4.26524	4.08403	4.2732	4.94159	4.53069	4.60908	4.45241	4.39148
Ribc1_ENSMUST00000026288	4.54338	4.57416	4.13816	4.33921	3.97677	4.41262	4.27799	4.45472	4.40281	4.00122	4.3966	4.21005	4.15059	4.26348	3.65793
Hsd17b10_ENSMUST00000026289	6.0393	6.24423	6.13271	6.28365	6.30126	6.34507	6.41044	6.37682	6.3038	6.52816	6.49377	6.50871	6.49722	6.32593	6.44564
Huwe1_ENSMUST00000026292	9.5739	10.2127	9.74098	10.2449	10.3034	9.71927	10.3966	9.8014	10.3074	10.353	9.71319	10.3763	9.71837	10.2782	10.4321
Fgd1_ENSMUST00000026296	5.9308	6.11194	5.8076	6.06547	6.10989	6.08493	6.07854	5.87806	6.08796	6.28431	5.93889	6.24645	5.76297	6.00578	6.15035
Sat1_ENSMUST00000026318	3.3879	3.28851	3.34702	2.79991	2.98317	3.50189	3.70093	3.25678	3.44835	3.2482	3.32384	3.19068	3.3715	3.05291	3.55167
Polr3a_ENSMUST00000026322	6.81994	7.19414	6.92885	7.28545	7.27998	6.98008	7.29441	6.75578	7.10809	7.21568	6.7528	7.0941	6.81465	7.07591	7.24928
Acot9_ENSMUST00000026324	4.19098	4.2357	3.96914	4.06406	4.05173	4.58595	4.72051	4.10478	4.36876	4.51878	4.80571	4.84335	4.56303	4.44195	4.73683
Prdx4_ENSMUST00000026328	7.09749	7.15718	6.94344	6.86981	7.10916	7.24949	7.29311	7.19058	7.13746	7.2234	7.25049	7.20603	7.16992	7.01021	7.39468
Padi3_ENSMUST00000026377	2.61738	2.44052	3.15975	2.5976	2.39181	1.89366	1.6115	2.51982	2.82623	2.19685	0.787788	1.75382	1.98585	1.95338	2.18779
Sbds_ENSMUST00000026387	6.69683	6.52398	6.52806	6.61782	6.65384	6.77092	6.54389	6.69445	6.57786	6.58917	6.7742	6.52426	6.69521	6.62291	6.64184
Bloc1s1_ENSMUST00000026405	4.90496	4.73503	4.76363	4.64715	4.60178	5.19788	4.86823	4.95068	4.75882	4.93695	4.96305	4.89212	5.12441	4.87394	4.65366
Ormdl2_ENSMUST00000026409	5.36534	5.13703	5.05228	4.96232	5.03643	5.49321	5.30158	4.99205	5.05488	5.18899	5.61899	5.07222	5.25565	4.97166	5.11192
Dnajc14_ENSMUST00000026410	3.85904	3.7106	3.70121	3.99508	3.97677	3.63414	3.86472	3.83607	3.96374	3.79569	3.84668	3.94316	3.7459	3.93112	3.65793
Dgka_ENSMUST00000026414	4.87687	5.27668	5.06759	5.00972	4.80323	5.36583	5.77582	5.06171	5.23577	5.91963	5.40053	5.76477	5.32167	5.41281	5.65152
Cdk2_ENSMUST00000026415	6.16944	6.22957	6.23116	6.27397	6.1644	6.38629	6.39834	6.23756	6.19385	6.40008	6.30506	6.44475	6.37817	6.39259	6.38762
Rps26_ENSMUST00000026420	6.72664	6.50584	6.83133	6.58298	6.61729	6.88594	6.57218	6.95722	6.57039	6.6667	6.96703	6.84232	6.80809	6.63902	6.68437
Esyt1_ENSMUST00000026427	7.54839	7.64813	7.26059	7.42531	7.52329	7.11448	7.25065	7.27261	7.39807	7.56254	7.19718	7.3114	7.07741	7.13227	7.42635
Smarcc2_ENSMUST00000026433	4.86262	4.8984	5.13453	4.80327	5.00534	4.76972	4.70487	5.13741	4.97792	4.71404	4.70745	4.9393	4.76636	4.88941	4.95402
Chmp6_ENSMUST00000026434	4.63005	4.216	4.07896	4.2532	4.31781	4.18716	4.28852	3.76625	4.40281	4.12725	4.04077	3.61544	3.95052	4.10022	3.9081
Baiap2_ENSMUST00000026436	5.01856	4.73503	5.27961	4.93802	4.68262	4.94124	4.83987	4.84174	4.57693	4.10514	4.74508	4.62989	5.14539	4.81845	4.52852
Nabp2_ENSMUST00000026439	4.41256	4.57416	4.573	4.45504	4.32789	4.49611	4.57325	4.66117	4.76538	4.58418	4.6818	4.56117	4.5939	4.21518	4.62774
Faap100_ENSMUST00000026448	3.48411	4.08097	4.06378	4.08635	3.98954	3.91981	4.38981	4.04706	4.03059	4.19162	4.02045	4.19717	4.46628	4.19042	4.27386
Atp5b_ENSMUST00000026459	11.0253	11.1534	11.1538	11.0414	11.1602	11.1837	11.1872	11.2805	11.0962	11.1696	11.2148	11.2733	11.3517	11.2654	11.2993
Prim1_ENSMUST00000026461	6.64157	6.9038	6.78578	6.90471	6.78046	6.82958	7.19436	6.87944	6.91959	7.11554	6.91844	7.15699	6.96387	7.09939	7.05552
Nab2_ENSMUST00000026469	6.56444	6.46471	6.86676	6.79906	6.24381	6.53751	6.29767	6.67553	6.54394	6.02644	6.39463	6.2589	6.53746	6.52973	6.40553
Shmt2_ENSMUST00000026470	8.74253	8.9661	8.75627	8.93668	9.07494	8.75255	8.99962	8.81642	8.9632	8.92694	8.63954	8.99316	8.69031	8.92855	9.10078
Gli1_ENSMUST00000026474	3.32693	3.80591	2.76832	3.45932	3.93777	4.5968	4.64876	4.14201	3.99755	5.07417	4.87525	4.90802	4.19152	4.41013	5.08042
Mbd6_ENSMUST00000026476	2.58303	3.06455	2.56762	3.19799	3.03335	2.80289	3.21866	2.40198	3.05756	3.288	2.37275	3.21645	2.9143	3.08013	3.15187
Dctn2_ENSMUST00000026479	7.62848	7.39362	7.66833	7.47577	7.26824	7.79996	7.63799	7.6197	7.41276	7.53386	7.75665	7.62569	7.60625	7.49538	7.48887
Ttc4_ENSMUST00000026480	5.92738	5.68397	5.9257	5.84144	5.72714	5.95185	5.67106	5.8218	5.90407	5.84488	5.98156	5.78644	5.79652	5.68074	5.64722
Ier3ip1_ENSMUST00000026487	5.40521	5.0999	5.37498	5.22083	5.23177	5.37215	5.38245	5.35914	5.18287	5.01017	5.18011	4.90802	5.47044	5.05634	5.05471
Rnf165_ENSMUST00000026494	2.61738	2.77259	2.84138	2.85286	3.2398	2.83988	2.84345	2.68028	2.94653	2.56406	2.98942	2.50479	2.96239	2.31595	3.05147
Atp5a1_ENSMUST00000026495	10.7013	10.6956	10.75	10.616	10.7475	10.8198	10.7235	10.9134	10.7009	10.6953	10.8415	10.8141	10.9341	10.7875	10.8322
Clns1a_ENSMUST00000026506	7.74083	7.62218	7.65825	7.56177	7.63821	7.96289	7.7958	7.74448	7.50479	7.63088	7.93686	7.70176	7.79071	7.62811	7.68803
4833420G17Rik_ENSMUST00000026519	3.62584	3.68218	3.81442	4.04143	4.07588	3.65504	4.07398	3.61557	3.71545	4.09395	3.22075	3.57618	3.29844	3.66958	4.0836
Paip1_ENSMUST00000026520	6.01373	5.70178	6.07329	5.93342	5.98157	6.0179	5.88741	6.02978	5.97085	5.73399	6.06329	5.93349	6.13232	6.03041	5.86992
Paox_ENSMUST00000026537	5.43921	5.63289	5.27961	5.40495	5.37973	5.37845	5.5754	5.39814	5.77028	5.65248	5.5709	5.47575	5.62037	5.73313	5.62556
Echs1_ENSMUST00000026538	7.09292	7.06936	7.14088	7.02639	7.10916	7.00269	6.94263	7.19943	7.19324	7.02128	7.06205	6.96327	6.9873	6.9598	7.03923
Tubgcp2_ENSMUST00000026547	5.96121	6.40508	5.97524	6.47101	6.34414	5.82382	6.38613	6.1351	6.42265	6.27444	5.95504	6.19231	5.92344	6.28265	6.15943
Dpysl4_ENSMUST00000026551	3.83004	3.72461	3.34702	3.97133	3.74042	3.63414	3.94679	3.76625	3.89363	3.86311	3.59514	3.53582	3.14018	3.39395	3.8791
Syce1_ENSMUST00000026553	5.12983	4.62731	4.82796	4.65463	4.61007	4.40029	4.37011	4.40963	4.23341	4.01314	4.38074	4.21005	4.41536	4.29867	3.8193
Ric8a_ENSMUST00000026558	4.77404	4.93501	4.87222	4.80998	4.84598	4.47274	4.80362	4.55475	4.76538	4.56	4.53195	4.60084	4.39797	4.47309	4.76881
Sirt3_ENSMUST00000026559	2.31651	2.82554	2.84138	2.77269	3.05781	2.55847	2.69303	1.89178	3.14061	2.80257	2.85818	2.77131	2.64636	2.60545	2.5969
Psmd13_ENSMUST00000026560	8.41957	8.23661	8.44222	8.26148	8.24613	8.51303	8.26971	8.32363	8.22124	8.22436	8.39413	8.25541	8.41913	8.19237	8.18224
Ifitm3_ENSMUST00000026565	5.54561	5.36875	5.07518	4.99213	5.20465	5.6315	5.38245	5.63202	5.32726	5.28062	5.85531	5.51261	5.33999	5.09021	5.30418
Ptdss2_ENSMUST00000026568	6.0891	5.96038	5.85689	5.87062	5.88238	6.06943	6.03542	5.78108	5.99616	6.01462	5.85531	5.77348	5.74933	5.8405	6.07883
Hras_ENSMUST00000026572	3.98278	3.77932	3.81442	3.69506	3.72523	3.90243	3.80729	3.66757	3.49644	3.82304	3.75126	3.92765	3.85183	3.83851	3.77275
Taldo1_ENSMUST00000026576	8.5132	8.47743	8.54968	8.40412	8.40288	8.64299	8.48301	8.54131	8.35714	8.45383	8.62363	8.48472	8.55962	8.41314	8.40585
Eps8l2_ENSMUST00000026577	3.50261	3.73848	3.55682	3.68049	3.17422	3.73578	3.70093	4.24827	3.88161	3.79569	3.91432	3.59594	3.00893	2.96802	3.56994
Pidd1_ENSMUST00000026580	1.98935	2.50686	1.85909	2.36222	2.22908	2.26402	2.48902	1.37095	2.13049	2.53127	2.1663	2.37355	1.67551	2.56749	1.98497
Tspan4_ENSMUST00000026585	4.47008	4.4105	3.96914	3.99508	4.31781	4.50765	4.53838	4.2986	4.40281	4.32195	4.41228	4.44612	4.28904	4.34429	4.42196
Tmem192_ENSMUST00000026595	3.0024	2.92594	2.47881	2.85286	2.73284	2.87595	2.9267	2.82467	3.14061	3.32673	2.94699	2.77131	3.4746	3.18416	3.53318
Apool_ENSMUST00000026599	5.43921	5.71937	5.76598	5.86096	5.66482	5.14713	5.52731	5.68974	5.78971	5.61385	5.38472	5.59348	5.41103	5.66285	5.47864
[truncated: 8,086 more rows]

## Sheet: Rps27_IP_vs_total
gene_name_ensembl_ID	log2_fold_change	average_expression_log2_cpm	t	p-value	adjusted_p-value	B
Cenpe_ENSMUST00000062893	-1.28566	7.71538	-23.0723	1.38588e-08	0.000139766	9.66379
Nup205_ENSMUST00000043815	-0.909074	8.76017	-17.3375	1.2985e-07	0.000575622	8.11886
Aspm_ENSMUST00000053364	-1.00595	7.85481	-16.7318	1.71231e-07	0.000575622	7.83721
Myh9_ENSMUST00000016771	-0.895471	8.36182	-15.3026	3.42202e-07	0.000862776	7.28509
Akap9_ENSMUST00000044492	-1.03581	6.95693	-14.45	5.32772e-07	0.0010387	6.78188
Mdn1_ENSMUST00000178134	-1.31649	9.285	-14.1744	6.17965e-07	0.0010387	6.77684
Trrap_ENSMUST00000100467	-0.776336	7.94208	-13.5588	8.69303e-07	0.00125242	6.44363
Cul7_ENSMUST00000043464	-0.779728	7.25074	-12.7125	1.42367e-06	0.00138876	5.96089
Herc2_ENSMUST00000076226	-0.905773	7.03516	-12.4643	1.65477e-06	0.00138876	5.80621
Myo5a_ENSMUST00000155282	-0.9835	6.22097	-12.3444	1.7812e-06	0.00138876	5.62607
Pnpt1_ENSMUST00000020756	-0.697876	7.36361	-12.1648	1.9914e-06	0.00138876	5.66176
Anapc1_ENSMUST00000014499	-0.690086	7.78606	-12.1184	2.05007e-06	0.00138876	5.65004
4932438A13Rik_ENSMUST00000057272	-0.857764	6.32719	-12.0858	2.09247e-06	0.00138876	5.51284
Agrn_ENSMUST00000180572	-0.768513	8.16531	-11.9716	2.24903e-06	0.00138876	5.57022
Plcg1_ENSMUST00000109462	-0.799173	6.50915	-11.9319	2.30641e-06	0.00138876	5.45628
Cecr2_ENSMUST00000112686	-0.694056	6.94149	-11.8441	2.43939e-06	0.00138876	5.45066
Smg1_ENSMUST00000032891	-0.761356	6.7793	-11.7704	2.55758e-06	0.00138876	5.39345
Pi4ka_ENSMUST00000036161	-0.767844	6.93195	-11.765	2.56647e-06	0.00138876	5.40218
Heatr1_ENSMUST00000059270	-0.901386	9.30809	-11.7352	2.6164e-06	0.00138876	5.43386
Nup188_ENSMUST00000064447	-0.66928	8.65567	-11.6037	2.84942e-06	0.00142712	5.34991
Knl1_ENSMUST00000099542	-0.700781	7.62314	-11.4766	3.09699e-06	0.00142712	5.25763
Prkdc_ENSMUST00000023352	-1.07047	7.44217	-11.4007	3.25641e-06	0.00142712	5.20207
Cyfip1_ENSMUST00000032629	-0.670382	8.10106	-11.3679	3.32811e-06	0.00142712	5.19694
Kntc1_ENSMUST00000031366	-0.74184	7.96121	-11.3374	3.39622e-06	0.00142712	5.1757
Ubr4_ENSMUST00000097822	-0.743018	9.33252	-11.1518	3.84685e-06	0.00155182	5.06234
Herc1_ENSMUST00000042824	-0.740338	7.05805	-10.9934	4.2844e-06	0.00166185	4.9334
Alms1_ENSMUST00000072018	-0.818394	6.54803	-10.8616	4.69146e-06	0.00171673	4.81773
Smc1a_ENSMUST00000045312	-0.614985	8.25807	-10.8021	4.88928e-06	0.00171673	4.82702
Golga4_ENSMUST00000084820	-0.708375	6.59752	-10.7882	4.93657e-06	0.00171673	4.7764
Bptf_ENSMUST00000057892	-0.715317	7.73852	-10.617	5.56639e-06	0.00181467	4.69798
Ints2_ENSMUST00000018212	-0.689035	6.88148	-10.614	5.57805e-06	0.00181467	4.67795
Cenpf_ENSMUST00000171929	-0.739742	8.62868	-10.5294	5.92295e-06	0.00183872	4.64054
Akap11_ENSMUST00000123853	-0.88363	7.54992	-10.4822	6.12537e-06	0.00183872	4.60304
Urb2_ENSMUST00000034457	-0.788144	7.98563	-10.4655	6.19895e-06	0.00183872	4.59477
Atad2_ENSMUST00000038194	-0.862238	8.1996	-10.4016	6.48964e-06	0.00186994	4.55052
Psme4_ENSMUST00000041231	-0.620029	8.35896	-10.3063	6.9517e-06	0.00194744	4.48326
Dync1h1_ENSMUST00000018851	-0.861591	9.65252	-10.2403	7.29337e-06	0.00198794	4.4355
Smc5_ENSMUST00000087556	-0.609356	7.35566	-10.1882	7.57634e-06	0.00201072	4.3961
Sun1_ENSMUST00000058716	-0.579031	7.44272	-10.1409	7.84433e-06	0.00202188	4.36308
2610507B11Rik_ENSMUST00000010421	-0.728709	6.58568	-10.0744	8.23827e-06	0.00202188	4.29635
Usp34_ENSMUST00000180046	-0.863323	7.39425	-10.0591	8.33171e-06	0.00202188	4.30359
Otud4_ENSMUST00000173078	-0.623251	7.37628	-10.0205	8.57395e-06	0.00202188	4.27602
Brca2_ENSMUST00000044620	-0.706742	8.26012	-10.0132	8.62081e-06	0.00202188	4.27135
Kmt2a_ENSMUST00000002095	-0.777709	5.56581	-9.98069	8.83176e-06	0.00202428	4.12116
Cep295_ENSMUST00000098979	-0.839096	6.72896	-9.90177	9.36878e-06	0.00206451	4.17906
Dmxl1_ENSMUST00000180611	-0.690341	6.67218	-9.89497	9.4167e-06	0.00206451	4.17341
Mycbp2_ENSMUST00000159855	-0.853886	6.81158	-9.7742	1.03157e-05	0.00221348	4.089
Cdc42bpb_ENSMUST00000041965	-0.682304	6.25289	-9.66593	1.12036e-05	0.00235393	3.98945
Gapvd1_ENSMUST00000102800	-0.599245	7.28269	-9.62711	1.15425e-05	0.00237563	3.98528
Sgo2a_ENSMUST00000027202	-1.00395	6.94723	-9.58682	1.19064e-05	0.00240151	3.95253
Nup107_ENSMUST00000064848	-0.572029	8.3425	-9.53249	1.24175e-05	0.00245549	3.90875
Rev3l_ENSMUST00000019986	-1.08297	5.03359	-9.48128	1.29217e-05	0.00246706	3.65817
Rictor_ENSMUST00000061656	-0.739086	6.47311	-9.47696	1.29652e-05	0.00246706	3.86137
Golgb1_ENSMUST00000039855	-1.03142	7.03374	-9.34235	1.44086e-05	0.00269094	3.76769
Pik3c2a_ENSMUST00000170430	-0.677876	5.82543	-9.28006	1.51364e-05	0.00273983	3.67643
Ttc3_ENSMUST00000117648	-0.858276	5.85309	-9.27365	1.52137e-05	0.00273983	3.6706
Ift172_ENSMUST00000041565	-0.846179	5.80898	-9.19465	1.62022e-05	0.00284533	3.60862
Opa1_ENSMUST00000160597	-0.615863	6.74388	-9.18224	1.63638e-05	0.00284533	3.64277
Ahctf1_ENSMUST00000027768	-0.652522	8.51469	-9.12943	1.70723e-05	0.0029182	3.58902
Huwe1_ENSMUST00000026292	-0.659997	9.99866	-9.05666	1.81051e-05	0.00304317	3.52558
Smc6_ENSMUST00000020931	-0.617639	6.8716	-8.89515	2.06559e-05	0.00335992	3.41476
Ctc1_ENSMUST00000116359	-0.491359	7.18603	-8.85551	2.13416e-05	0.00335992	3.37894
Taf1_ENSMUST00000118878	-0.687517	6.91227	-8.85454	2.13586e-05	0.00335992	3.38163
Hadha_ENSMUST00000156859	-0.521481	7.95898	-8.84417	2.15424e-05	0.00335992	3.35934
Atm_ENSMUST00000232179	-0.826162	7.02356	-8.83581	2.16917e-05	0.00335992	3.36565
Tsc2_ENSMUST00000097373	-0.651229	6.74125	-8.80269	2.22949e-05	0.00335992	3.34048
Kmt2d_ENSMUST00000023741	-0.593277	7.03157	-8.80124	2.23217e-05	0.00335992	3.33662
Myo1b_ENSMUST00000046390	-0.787204	7.21204	-8.77316	2.28485e-05	0.00338864	3.31174
Birc6_ENSMUST00000180037	-0.557106	9.41072	-8.7132	2.40204e-05	0.00351081	3.23984
Ap3d1_ENSMUST00000020420	-0.637118	6.8607	-8.69222	2.44461e-05	0.00351817	3.24879
Zfp106_ENSMUST00000055241	-0.731437	8.00065	-8.6603	2.511e-05	0.00351817	3.20501
Bms1_ENSMUST00000032237	-0.47312	8.00343	-8.65995	2.51173e-05	0.00351817	3.2038
Hectd4_ENSMUST00000042614	-0.942317	5.01797	-8.58013	2.68678e-05	0.00371181	3.03765
Snx14_ENSMUST00000165315	-0.663768	5.91902	-8.55557	2.74336e-05	0.00372445	3.12749
Ncaph_ENSMUST00000110387	-0.543219	7.55506	-8.54428	2.76979e-05	0.00372445	3.11228
Smc2_ENSMUST00000117280	-0.576413	8.67134	-8.50496	2.86414e-05	0.00374329	3.06438
Pik3r4_ENSMUST00000191268	-0.780059	6.76586	-8.49959	2.87731e-05	0.00374329	3.08938
Smg5_ENSMUST00000001451	-0.675078	5.97612	-8.49235	2.89516e-05	0.00374329	3.07853
Fancm_ENSMUST00000058889	-0.949456	5.24767	-8.45985	2.97681e-05	0.00379989	2.98653
Wdfy3_ENSMUST00000053177	-1.03474	5.86092	-8.41931	3.08227e-05	0.00379989	3.01086
Akap8l_ENSMUST00000050214	-0.742938	5.91233	-8.4178	3.08628e-05	0.00379989	3.01475
Mtor_ENSMUST00000103221	-0.589497	7.44394	-8.40746	3.11388e-05	0.00379989	2.99673
Son_ENSMUST00000122302	-0.765939	6.10962	-8.40246	3.12733e-05	0.00379989	3.00789
Cep250_ENSMUST00000109619	-1.10386	4.46926	-8.37228	3.20987e-05	0.00385376	2.73638
Daam1_ENSMUST00000223272	-0.662565	5.64028	-8.3391	3.30346e-05	0.0038805	2.9373
Gcn1_ENSMUST00000064454	-0.58652	8.83734	-8.33713	3.3091e-05	0.0038805	2.91613
Ppp1r15b_ENSMUST00000052529	-0.552207	6.70661	-8.20415	3.71652e-05	0.00417886	2.83603
Iars2_ENSMUST00000027921	-0.665712	7.5628	-8.19959	3.73146e-05	0.00417886	2.81185
Myo1e_ENSMUST00000034745	-0.697807	5.78239	-8.17926	3.79885e-05	0.00417886	2.81282
Tgs1_ENSMUST00000052712	-0.461179	7.01642	-8.17704	3.80627e-05	0.00417886	2.80423
Zfp445_ENSMUST00000216063	-0.58574	6.86846	-8.17532	3.81205e-05	0.00417886	2.80715
Myo1c_ENSMUST00000069057	-0.718141	6.23874	-8.17465	3.81429e-05	0.00417886	2.81696
Ap1g1_ENSMUST00000093157	-0.477414	7.34559	-8.16303	3.85359e-05	0.00417886	2.78335
Atp11b_ENSMUST00000029257	-0.584907	6.21866	-8.08669	4.12322e-05	0.00442369	2.741
Thada_ENSMUST00000047524	-0.609772	7.48152	-8.01568	4.39293e-05	0.00466344	2.64801
Chd1l_ENSMUST00000029730	-0.617595	5.79885	-7.99471	4.47631e-05	0.00470245	2.65753
Htt_ENSMUST00000080036	-0.52415	6.68521	-7.91788	4.79709e-05	0.0049875	2.58227
Dlc1_ENSMUST00000033923	-0.484715	7.16021	-7.88759	4.93055e-05	0.00506835	2.53945
Ints10_ENSMUST00000034328	-0.458727	7.00124	-7.87762	4.97537e-05	0.00506835	2.53526
Polr1b_ENSMUST00000103205	-0.531196	7.80947	-7.84719	5.11498e-05	0.00508372	2.48453
Kif20b_ENSMUST00000087341	-0.570326	8.13519	-7.84041	5.14668e-05	0.00508372	2.47202
Pdzd8_ENSMUST00000099274	-0.674278	5.24042	-7.83517	5.17134e-05	0.00508372	2.48973
Ube3c_ENSMUST00000049453	-0.519255	6.72071	-7.83078	5.1921e-05	0.00508372	2.50198
Dnajc13_ENSMUST00000035170	-0.711679	7.90335	-7.80869	5.29792e-05	0.00513745	2.44765
Gfm2_ENSMUST00000161639	-0.462139	7.05526	-7.78886	5.39498e-05	0.00518175	2.45171
Trip11_ENSMUST00000021605	-0.597801	5.67627	-7.73553	5.66589e-05	0.00536746	2.42923
Hcfc1_ENSMUST00000033761	-0.517412	9.01139	-7.73001	5.69478e-05	0.00536746	2.35819
Vps13c_ENSMUST00000077879	-0.427856	7.51908	-7.6728	6.00412e-05	0.00560662	2.32768
Myo9b_ENSMUST00000071935	-0.777367	5.07581	-7.65637	6.09638e-05	0.00560688	2.32144
Heatr5b_ENSMUST00000097281	-0.519504	6.38322	-7.65298	6.11559e-05	0.00560688	2.34936
Las1l_ENSMUST00000079987	-0.535733	7.57447	-7.62554	6.27376e-05	0.00567248	2.28193
Tep1_ENSMUST00000006444	-0.926419	5.49779	-7.62112	6.29964e-05	0.00567248	2.32002
Vps13a_ENSMUST00000068156	-0.574282	7.08741	-7.60191	6.41355e-05	0.00572395	2.27622
Gemin4_ENSMUST00000102500	-0.499	7.60352	-7.57133	6.59967e-05	0.00582251	2.22896
Urb1_ENSMUST00000140920	-0.727067	7.33636	-7.56422	6.64379e-05	0.00582251	2.23266
Alg2_ENSMUST00000044148	-0.608828	5.56263	-7.55411	6.70713e-05	0.00582251	2.26524
Prpf8_ENSMUST00000018449	-0.605884	10.2647	-7.53	6.86087e-05	0.00582251	2.1624
Pkp2_ENSMUST00000039408	-0.672446	6.32686	-7.52871	6.8692e-05	0.00582251	2.23663
Ap3b1_ENSMUST00000022196	-0.475158	7.72339	-7.51523	6.95693e-05	0.00582251	2.17141
Gm47283_ENSMUST00000177591	-1.52733	2.82717	-7.49757	7.07378e-05	0.00582251	1.32543
Ipo4_ENSMUST00000047131	-0.662802	5.41995	-7.49632	7.08214e-05	0.00582251	2.20842
Lrpprc_ENSMUST00000112308	-0.495987	9.21753	-7.49361	7.10028e-05	0.00582251	2.1293
Pcnt_ENSMUST00000001179	-0.764009	7.8841	-7.48448	7.16181e-05	0.00582251	2.13946
Vps13b_ENSMUST00000048646	-0.578239	6.66411	-7.4812	7.18406e-05	0.00582251	2.17845
Ogdh_ENSMUST00000003461	-0.486129	7.69569	-7.4764	7.2168e-05	0.00582251	2.13464
Ctr9_ENSMUST00000005749	-0.469247	7.66487	-7.45287	7.37943e-05	0.00590648	2.11253
Atp13a1_ENSMUST00000034326	-0.468742	6.6558	-7.42856	7.55183e-05	0.00599687	2.12774
Cabin1_ENSMUST00000001712	-0.676135	5.77189	-7.39295	7.81239e-05	0.00606699	2.12089
Apc_ENSMUST00000079362	-0.731866	6.27476	-7.39264	7.81475e-05	0.00606699	2.1105
Top2a_ENSMUST00000068031	-0.408831	10.8424	-7.39185	7.82061e-05	0.00606699	2.02779
Ogdhl_ENSMUST00000022480	-0.424081	7.96875	-7.36058	8.05802e-05	0.00620344	2.01393
Adnp2_ENSMUST00000066743	-0.500721	6.39861	-7.29199	8.60713e-05	0.00657598	2.00773
Ncapg2_ENSMUST00000084828	-0.434254	6.96208	-7.24415	9.01476e-05	0.00683031	1.93422
Ralgapb_ENSMUST00000109485	-0.62691	5.52288	-7.23723	9.07548e-05	0.00683031	1.97528
Kif14_ENSMUST00000189413	-0.901465	5.57725	-7.22495	9.1843e-05	0.00686102	1.96394
Kmt2c_ENSMUST00000045291	-0.473745	7.04462	-7.1919	9.48447e-05	0.00690267	1.87896
Vps13d_ENSMUST00000036579	-0.576747	5.93227	-7.1896	9.50577e-05	0.00690267	1.92657
Focad_ENSMUST00000097992	-0.4893	6.26253	-7.18866	9.51449e-05	0.00690267	1.91335
Setx_ENSMUST00000061578	-0.860356	8.98002	-7.17306	9.66051e-05	0.00690267	1.81298
Atad2b_ENSMUST00000045664	-0.547794	6.171	-7.17235	9.66718e-05	0.00690267	1.90163
Pmpcb_ENSMUST00000030882	-0.44685	7.46097	-7.16902	9.69871e-05	0.00690267	1.83843
Zfyve26_ENSMUST00000021547	-0.736191	4.81707	-7.16686	9.71917e-05	0.00690267	1.87009
Gtpbp4_ENSMUST00000222098	-0.520075	8.73895	-7.14441	9.93508e-05	0.00700666	1.78531
Nynrin_ENSMUST00000168479	-0.666038	5.26181	-7.13252	0.000100516	0.0070396	1.87144
Gemin5_ENSMUST00000035604	-0.477855	7.80084	-7.12277	0.000101483	0.00705141	1.78072
Szt2_ENSMUST00000075406	-0.684083	5.00865	-7.11677	0.000102083	0.00705141	1.84307
Mcm3ap_ENSMUST00000170795	-0.930003	7.22395	-7.09588	0.000104202	0.00714109	1.7797
Usp9x_ENSMUST00000089302	-0.417076	10.3385	-7.0901	0.000104797	0.00714109	1.72313
Fnip1_ENSMUST00000046835	-0.677766	6.0406	-7.06712	0.000107201	0.00725257	1.80499
Pdpr_ENSMUST00000039333	-0.572937	6.24053	-7.06081	0.000107872	0.00725257	1.78964
Rttn_ENSMUST00000023828	-0.688229	5.63887	-7.01551	0.000112825	0.00751951	1.76515
Setd2_ENSMUST00000153838	-0.639291	7.20624	-7.01098	0.000113333	0.00751951	1.69094
Mast2_ENSMUST00000106486	-0.957024	3.71137	-6.99863	0.000114734	0.00755833	1.471
Trpm7_ENSMUST00000103224	-0.559452	5.75624	-6.99267	0.000115417	0.00755833	1.74046
Klhl11_ENSMUST00000056665	-0.583186	6.04212	-6.98488	0.000116316	0.00756803	1.72339
Jade1_ENSMUST00000026865	-0.374412	9.50754	-6.96151	0.00011906	0.00769695	1.59164
Mbtps1_ENSMUST00000081381	-0.606581	6.18095	-6.93356	0.000122438	0.00786283	1.66619
Mia3_ENSMUST00000109158	-0.572734	5.62962	-6.91929	0.000124203	0.00786283	1.67153
Rock1_ENSMUST00000067947	-0.46081	6.6898	-6.91621	0.000124588	0.00786283	1.61918
Hdac6_ENSMUST00000115642	-0.377108	7.34671	-6.91495	0.000124745	0.00786283	1.58344
Cplane1_ENSMUST00000110617	-0.828383	5.50453	-6.8999	0.000126647	0.00793313	1.65441
Abl2_ENSMUST00000027888	-0.545978	5.5948	-6.87402	0.000129992	0.00809238	1.62771
Espl1_ENSMUST00000064924	-0.830262	8.19297	-6.85757	0.000132168	0.00817737	1.49958
Enc1_ENSMUST00000041623	-0.428033	7.3506	-6.83751	0.000134878	0.00829416	1.50325
Wdr6_ENSMUST00000068700	-0.483973	7.79654	-6.81816	0.00013755	0.00840721	1.46648
Snrnp70_ENSMUST00000074575	-0.416535	8.43804	-6.70234	0.00015482	0.00937689	1.32816
Fnip2_ENSMUST00000076136	-0.808805	5.22511	-6.69483	0.00015602	0.00937689	1.45289
Ibtk_ENSMUST00000039213	-0.435134	6.52435	-6.69126	0.000156593	0.00937689	1.3964
Nup160_ENSMUST00000057481	-0.384883	8.8426	-6.68791	0.000157134	0.00937689	1.30732
Taf2_ENSMUST00000041733	-0.580199	6.05085	-6.66753	0.000160468	0.00942327	1.40241
Mroh1_ENSMUST00000096385	-0.736923	4.87245	-6.66685	0.000160581	0.00942327	1.41396
Immt_ENSMUST00000064062	-0.570895	7.69109	-6.66212	0.000161368	0.00942327	1.30536
Ticrr_ENSMUST00000035977	-0.754288	7.88669	-6.66043	0.000161649	0.00942327	1.29855
Spg11_ENSMUST00000036450	-0.596287	6.37473	-6.64662	0.000163971	0.00946168	1.36099
Mki67_ENSMUST00000033310	-0.403792	8.57806	-6.64537	0.000164184	0.00946168	1.26484
Ccdc88c_ENSMUST00000068411	-0.876596	6.03563	-6.63757	0.000165513	0.0094841	1.37527
Ric1_ENSMUST00000043610	-0.701955	5.1609	-6.61889	0.000168748	0.00956014	1.37758
Myh10_ENSMUST00000102611	-0.842256	7.47747	-6.61508	0.000169417	0.00956014	1.26712
Dcaf1_ENSMUST00000159645	-0.45685	7.93964	-6.61229	0.000169908	0.00956014	1.24271
Atg2b_ENSMUST00000041055	-0.536474	6.28068	-6.60549	0.000171111	0.00956014	1.3234
Ambra1_ENSMUST00000045705	-0.669409	6.14824	-6.60286	0.00017158	0.00956014	1.33056
Mms22l_ENSMUST00000108222	-0.508094	6.15318	-6.58549	0.000174707	0.00968089	1.31012
Znfx1_ENSMUST00000048988	-0.71888	4.54602	-6.55664	0.000180041	0.00992195	1.28326
Virma_ENSMUST00000059914	-0.41332	7.14457	-6.54683	0.000181897	0.00994592	1.20493
Aldh18a1_ENSMUST00000025979	-0.666103	7.33645	-6.54186	0.000182845	0.00994592	1.19251
Ep400_ENSMUST00000041558	-0.522506	7.66769	-6.53868	0.000183453	0.00994592	1.17274
Ubr2_ENSMUST00000113337	-0.54487	7.31375	-6.53365	0.000184421	0.00994592	1.18325
Ccnf_ENSMUST00000115390	-0.372779	8.34167	-6.50263	0.00019052	0.0102025	1.11356
Pak1ip1_ENSMUST00000046951	-0.404419	7.55402	-6.49922	0.000191203	0.0102025	1.13321
Ccar2_ENSMUST00000035612	-0.525179	5.49347	-6.46815	0.000197561	0.0104863	1.22168
Smc3_ENSMUST00000025930	-0.418686	9.04593	-6.44745	0.000201925	0.0105378	1.04373
Fastkd1_ENSMUST00000073152	-0.764639	4.3083	-6.44712	0.000201994	0.0105378	1.15109
Abcg2_ENSMUST00000031822	-0.408756	7.11575	-6.44645	0.000202138	0.0105378	1.09758
Nf1_ENSMUST00000071325	-1.06371	5.52621	-6.44377	0.000202711	0.0105378	1.19873
Ascc3_ENSMUST00000035606	-0.586099	6.82741	-6.43426	0.000204761	0.0105898	1.10433
Ralgapa1_ENSMUST00000085385	-0.514751	5.37731	-6.389	0.000214834	0.0110541	1.14331
Rptor_ENSMUST00000026671	-0.559463	6.03683	-6.38086	0.000216705	0.0110937	1.10174
Macf1_ENSMUST00000097897	-0.597952	6.41754	-6.37607	0.000217811	0.0110941	1.06986
Lrp6_ENSMUST00000032322	-0.436325	6.39602	-6.36554	0.000220269	0.0111629	1.0582
Pkp4_ENSMUST00000102754	-0.477919	5.59687	-6.35255	0.000223346	0.0112622	1.09673
Pan2_ENSMUST00000005825	-0.488972	6.29378	-6.33819	0.000226801	0.011351	1.03674
Gtf3c1_ENSMUST00000055506	-0.402514	7.8044	-6.3359	0.000227357	0.011351	0.943637
Pole_ENSMUST00000007296	-0.327366	8.22918	-6.31484	0.000232545	0.0115528	0.907744
Wdr62_ENSMUST00000108190	-0.691007	6.22012	-6.30703	0.000234501	0.0115929	1.011
Ccdc18_ENSMUST00000047677	-0.921708	4.82159	-6.26456	0.000245466	0.0119909	1.01437
Tpr_ENSMUST00000124973	-0.468283	9.75944	-6.26357	0.00024573	0.0119909	0.834403
Mrps30_ENSMUST00000022245	-0.390764	7.20735	-6.2621	0.00024612	0.0119909	0.88853
Wdtc1_ENSMUST00000043305	-0.383625	7.60336	-6.25491	0.000248035	0.0120261	0.860642
Usp54_ENSMUST00000022356	-0.695976	5.11802	-6.23444	0.000253585	0.0122364	0.988075
Vwa8_ENSMUST00000040990	-0.591379	5.71737	-6.20863	0.00026078	0.0125236	0.937579
Tmod3_ENSMUST00000072232	0.698247	6.82428	6.19379	0.000265018	0.0126187	0.834088
Wdr33_ENSMUST00000025264	-0.329763	7.85379	-6.19294	0.000265262	0.0126187	0.780672
Dmxl2_ENSMUST00000118163	-0.578533	5.50414	-6.18043	0.000268898	0.0127316	0.919082
Myo10_ENSMUST00000110457	-1.02785	8.05818	-6.16544	0.000273327	0.0128324	0.749122
Fat1_ENSMUST00000191428	-0.547567	9.74476	-6.16462	0.000273571	0.0128324	0.722133
Efr3a_ENSMUST00000015146	-0.578384	5.85466	-6.14338	0.000279992	0.0130383	0.857472
Washc5_ENSMUST00000022976	-0.499386	6.7837	-6.14157	0.000280546	0.0130383	0.782339
Anapc4_ENSMUST00000031072	-0.345668	7.21444	-6.11391	0.000289175	0.0133777	0.720522
Fbxo38_ENSMUST00000048688	-0.485104	7.02222	-6.09366	0.000295676	0.0135829	0.711106
Kdm6a_ENSMUST00000044484	-0.584962	6.76388	-6.08822	0.000297453	0.0135829	0.724687
Pms1_ENSMUST00000027267	-0.656581	5.56124	-6.08761	0.000297652	0.0135829	0.816267
Pik3cb_ENSMUST00000035037	-0.618957	5.09057	-6.07862	0.000300611	0.0136562	0.824702
Rif1_ENSMUST00000112693	-0.526966	10.2753	-6.06197	0.00030618	0.0138467	0.603417
Uhrf1bp1l_ENSMUST00000020112	-0.674772	4.8058	-6.0491	0.000310563	0.0139823	0.794123
Copa_ENSMUST00000135192	-0.384966	8.82629	-6.02644	0.000318446	0.0142735	0.569204
Ercc6l_ENSMUST00000056904	-0.541279	6.93324	-6.02066	0.000320494	0.0143017	0.634671
Med12_ENSMUST00000117203	-0.568015	6.82283	-6.00756	0.000325184	0.0144471	0.628349
Ergic2_ENSMUST00000136008	-0.52845	5.5562	-5.99768	0.000328774	0.0145425	0.717047
Polr3b_ENSMUST00000077175	-0.418148	7.45223	-5.97561	0.000336948	0.014839	0.549248
Zfp229_ENSMUST00000065871	-0.602116	5.28412	-5.96049	0.000342679	0.0148496	0.69154
Ncbp1_ENSMUST00000030014	-0.349202	7.7202	-5.95719	0.000343941	0.0148496	0.514745
Msh3_ENSMUST00000185852	-0.569647	5.67258	-5.95617	0.000344335	0.0148496	0.663638
Dna2_ENSMUST00000131422	-0.430049	6.60526	-5.95596	0.000344416	0.0148496	0.584309
Hipk1_ENSMUST00000118317	-0.646595	4.98125	-5.95561	0.000344551	0.0148496	0.695362
Rlf_ENSMUST00000056635	-0.404882	7.32266	-5.94823	0.000347402	0.0148723	0.524295
Rhbdf2_ENSMUST00000103028	-0.628444	4.64663	-5.94662	0.000348028	0.0148723	0.683851
Bahcc1_ENSMUST00000044985	-0.748126	4.26387	-5.94071	0.000350335	0.0149077	0.654167
Trap1_ENSMUST00000006137	-0.310637	8.76169	-5.92955	0.00035474	0.0150317	0.456704
Sdha_ENSMUST00000022062	-0.353173	9.11786	-5.91357	0.000361153	0.0152319	0.434175
Cnot1_ENSMUST00000211887	-0.39173	9.26689	-5.91029	0.000362485	0.0152319	0.429203
Oxct1_ENSMUST00000110690	-0.352061	7.18609	-5.90361	0.000365214	0.0152829	0.479906
Rrm1_ENSMUST00000033283	-0.301697	9.15222	-5.88628	0.000372398	0.0155192	0.401612
Usp24_ENSMUST00000094933	-0.510358	6.73887	-5.87241	0.000378266	0.0156837	0.477772
Washc4_ENSMUST00000038388	-0.394468	6.80502	-5.86962	0.000379456	0.0156837	0.467855
Plekhh1_ENSMUST00000039928	-0.637027	5.46243	-5.86167	0.000382874	0.0157603	0.57309
Mastl_ENSMUST00000028119	-0.397587	6.24673	-5.84053	0.000392131	0.0160455	0.481754
Fam83h_ENSMUST00000060807	-0.856821	4.77257	-5.8381	0.00039321	0.0160455	0.570499
Myo9a_ENSMUST00000136740	-1.06093	4.62481	-5.83504	0.000394575	0.0160455	0.563898
Ints1_ENSMUST00000200393	-0.374056	7.69917	-5.83091	0.000396424	0.016056	0.367584
Blm_ENSMUST00000081314	-0.31331	7.85066	-5.79359	0.000413579	0.0166838	0.316752
Lcor_ENSMUST00000172371	-0.487433	5.552	-5.78015	0.000419954	0.0166874	0.473545
Utp20_ENSMUST00000004470	-0.753976	8.80456	-5.7763	0.000421801	0.0166874	0.275961
Tnpo3_ENSMUST00000012679	-0.39755	7.91594	-5.77558	0.000422149	0.0166874	0.293651
Cpsf2_ENSMUST00000047357	-0.312847	7.4012	-5.77547	0.000422201	0.0166874	0.315764
Kdm5a_ENSMUST00000005108	-0.439167	6.63721	-5.77128	0.000424222	0.0166874	0.367
Smpd4_ENSMUST00000006053	-0.373091	7.15202	-5.76972	0.000424975	0.0166874	0.32482
Fryl_ENSMUST00000101127	-0.917317	6.01423	-5.76916	0.000425251	0.0166874	0.429254
Uhrf1bp1_ENSMUST00000114849	-0.659922	5.22209	-5.76411	0.000427705	0.0167186	0.478259
Dlst_ENSMUST00000053811	-0.408851	7.31281	-5.75465	0.000432352	0.016835	0.297226
Rad21_ENSMUST00000022927	-0.408217	8.63164	-5.74748	0.000435909	0.0169083	0.242744
Top3a_ENSMUST00000002891	-0.486686	5.36745	-5.73635	0.000441495	0.0170593	0.436907
Zfp318_ENSMUST00000113481	-0.586524	5.86948	-5.71588	0.000451977	0.0173976	0.374717
Abr_ENSMUST00000072740	-0.391633	6.16945	-5.68282	0.000469487	0.018003	0.305079
Fam135a_ENSMUST00000027337	-0.652618	4.40147	-5.66616	0.000478597	0.0182828	0.379447
Tbk1_ENSMUST00000020316	-0.49625	5.4752	-5.6512	0.000486936	0.0185311	0.332145
Me2_ENSMUST00000025439	-0.350024	7.1424	-5.64116	0.000492627	0.0186647	0.171582
Rab3gap2_ENSMUST00000069652	-0.55796	6.77689	-5.6385	0.000494148	0.0186647	0.199293
Atg2a_ENSMUST00000045351	-0.429856	5.66448	-5.6307	0.000498629	0.0186974	0.291801
Mlh3_ENSMUST00000019378	-0.575447	4.74925	-5.63054	0.000498722	0.0186974	0.344799
Polr2b_ENSMUST00000031167	-0.493188	8.65296	-5.62538	0.000501714	0.0187399	0.0951359
Ofd1_ENSMUST00000049501	-0.46498	5.29256	-5.62082	0.000504373	0.0187697	0.310309
Kbtbd2_ENSMUST00000114321	-0.537292	5.00659	-5.60635	0.000512919	0.0190176	0.310316
Dop1a_ENSMUST00000190957	-0.85386	3.83196	-5.60235	0.000515314	0.0190364	0.260759
Eif3d_ENSMUST00000100484	-0.306609	9.46475	-5.59882	0.00051743	0.0190448	0.0540204
Ubn1_ENSMUST00000230703	-0.63212	4.2847	-5.58218	0.000527552	0.0193468	0.284747
Mcm3_ENSMUST00000053266	-0.297534	9.79497	-5.57556	0.00053164	0.0193849	0.024145
Gclc_ENSMUST00000034905	-0.385993	6.14809	-5.57428	0.000532436	0.0193849	0.178649
Sipa1l2_ENSMUST00000212987	-0.822267	4.7551	-5.56339	0.000539244	0.0195621	0.270815
Ccdc88a_ENSMUST00000040182	-0.388216	6.2278	-5.555	0.000544554	0.019669	0.147714
Fscn1_ENSMUST00000031565	-0.291075	8.75803	-5.55059	0.000547371	0.019669	0.00150292
Brwd1_ENSMUST00000099502	-0.381054	7.27597	-5.54954	0.00054804	0.019669	0.0520419
Acp6_ENSMUST00000090759	-0.371573	8.0302	-5.54154	0.0005532	0.0197838	0.0065311
2610021A01Rik_ENSMUST00000163475	-0.656692	4.40824	-5.51842	0.000568394	0.0202553	0.220106
Polr1a_ENSMUST00000055296	-0.404671	7.45104	-5.50335	0.000578547	0.0205163	-0.014782
9930021J03Rik_ENSMUST00000177155	-0.698614	3.9707	-5.50154	0.000579785	0.0205163	0.175749
Nol6_ENSMUST00000030138	-0.394431	8.25003	-5.49624	0.000583406	0.0205419	-0.0553985
Kif18a_ENSMUST00000028527	-0.554559	6.58386	-5.49453	0.000584582	0.0205419	0.0425839
Nbeal1_ENSMUST00000160834	-0.776679	5.1814	-5.48674	0.000589968	0.0206591	0.166202
L2hgdh_ENSMUST00000021370	-0.533119	5.42697	-5.46353	0.000606348	0.0211593	0.11845
Pcca_ENSMUST00000038374	-0.612659	5.94042	-5.45944	0.000609287	0.0211885	0.065945
Resf1_ENSMUST00000046689	-0.672766	8.7072	-5.45548	0.000612146	0.0212147	-0.113957
Ago2_ENSMUST00000044113	-0.408891	7.1216	-5.43947	0.000623853	0.0215464	-0.0720716
Mars_ENSMUST00000037290	-0.310714	9.06671	-5.42637	0.000633615	0.0218089	-0.155875
Mid1_ENSMUST00000112104	-1.55646	4.72188	-5.39798	0.000655355	0.0224805	0.0878342
Mccc1_ENSMUST00000029259	-0.491126	5.41923	-5.38679	0.000664149	0.0226471	0.0276956
Nbeal2_ENSMUST00000167320	-0.881806	3.50736	-5.38386	0.00066647	0.0226471	-0.0112849
Gfm1_ENSMUST00000077271	-0.415606	7.78071	-5.38326	0.000666949	0.0226471	-0.179818
Ints11_ENSMUST00000030901	-0.368301	7.10095	-5.36802	0.000679187	0.022935	-0.159564
Prr14l_ENSMUST00000120129	-0.559787	6.1957	-5.36704	0.000679977	0.022935	-0.0736828
Ice1_ENSMUST00000043493	-0.520199	6.215	-5.35439	0.000690344	0.0232071	-0.0921683
Coq6_ENSMUST00000110276	-0.436846	5.63533	-5.35078	0.000693332	0.0232301	-0.0367794
Polr2a_ENSMUST00000058470	-0.31836	9.47409	-5.33666	0.000705155	0.0234714	-0.271516
Tarbp1_ENSMUST00000170518	-0.479181	5.82373	-5.33502	0.000706541	0.0234714	-0.0745688
Dicer1_ENSMUST00000041987	-0.380145	7.05124	-5.33387	0.000707517	0.0234714	-0.198252
Kif4_ENSMUST00000048962	-0.31109	7.12898	-5.32089	0.000718625	0.0237617	-0.221219
Abcb7_ENSMUST00000033695	-0.324736	7.21382	-5.30745	0.000730318	0.0240204	-0.244034
Etl4_ENSMUST00000114627	-0.626694	6.98631	-5.30568	0.00073188	0.0240204	-0.224464
Ncor1_ENSMUST00000018645	-0.362115	7.26943	-5.29901	0.000737775	0.0240204	-0.258017
Gprasp1_ENSMUST00000113147	-0.437474	7.17235	-5.2955	0.000740896	0.0240204	-0.254665
Carmil1_ENSMUST00000072889	-0.592634	5.47395	-5.29371	0.000742499	0.0240204	-0.0872905
Kidins220_ENSMUST00000222941	-0.44199	5.73742	-5.29342	0.000742757	0.0240204	-0.116683
Lrba_ENSMUST00000107635	-0.723797	6.39016	-5.29247	0.000743609	0.0240204	-0.182204
Mrps27_ENSMUST00000052249	-0.382285	6.52253	-5.29036	0.000745503	0.0240204	-0.205151
Shprh_ENSMUST00000044053	-0.415978	6.30004	-5.28696	0.000748566	0.0240423	-0.18589
Ncapd3_ENSMUST00000073127	-0.37236	7.58974	-5.28392	0.000751308	0.0240538	-0.295974
Copg1_ENSMUST00000113607	-0.333337	8.02423	-5.27523	0.000759227	0.0242304	-0.325563
Aco1_ENSMUST00000102973	-0.31885	6.75705	-5.26936	0.000764631	0.0243259	-0.254701
2610008E11Rik_ENSMUST00000039271	-1.02541	2.62285	-5.2631	0.000770438	0.0244336	-0.345478
Ltbp1_ENSMUST00000112514	-0.596435	5.08292	-5.25882	0.00077443	0.0244832	-0.0959147
Pikfyve_ENSMUST00000081154	-0.366178	6.40438	-5.25396	0.000778996	0.0245189	-0.238648
Nrk_ENSMUST00000064937	-1.23538	2.73532	-5.25245	0.000780425	0.0245189	-0.331763
Kdm5b_ENSMUST00000047714	-0.302933	10.3873	-5.21107	0.000820597	0.0256497	-0.432866
Stxbp2_ENSMUST00000160708	-0.442766	5.69212	-5.21017	0.000821503	0.0256497	-0.213752
Dock11_ENSMUST00000033419	-0.473932	6.06227	-5.19972	0.000832009	0.0258274	-0.267251
Zfp518a_ENSMUST00000050092	-0.557124	7.5255	-5.19942	0.000832317	0.0258274	-0.397218
Hectd1_ENSMUST00000042052	-0.345507	7.55883	-5.18965	0.000842279	0.025989	-0.414259
Hspa14_ENSMUST00000027961	-0.476636	7.23013	-5.18926	0.000842679	0.025989	-0.392538
Pfas_ENSMUST00000021282	-0.42606	8.71048	-5.18535	0.000846709	0.0260337	-0.455856
Pgap1_ENSMUST00000097739	-0.35399	6.44989	-5.17913	0.000853159	0.0261523	-0.337289
Phkb_ENSMUST00000053771	-0.582742	4.82608	-5.14693	0.000887418	0.02712	-0.212246
Cdk5rap2_ENSMUST00000144099	-0.451067	6.58143	-5.13606	0.000899327	0.0272978	-0.404059
Tbl1xr1_ENSMUST00000193734	-0.375421	5.64658	-5.1349	0.000900607	0.0272978	-0.302675
Togaram1_ENSMUST00000066296	-0.60613	4.97583	-5.13422	0.000901356	0.0272978	-0.237255
Mapkap1_ENSMUST00000147337	-0.767524	4.15704	-5.12299	0.000913868	0.0275771	-0.226066
Dpp9_ENSMUST00000038794	-0.373478	5.6567	-5.12105	0.000916045	0.0275771	-0.321027
Atp13a3_ENSMUST00000100013	-0.333198	6.84499	-5.11548	0.000922342	0.027684	-0.457448
Vps16_ENSMUST00000028900	-0.461254	6.93404	-5.10283	0.000936805	0.0280346	-0.479654
Epg5_ENSMUST00000044622	-0.653713	4.61758	-5.09704	0.000943512	0.0281518	-0.260701
Brip1_ENSMUST00000044423	-0.555704	5.14308	-5.08657	0.000955776	0.0284298	-0.308449
Hip1r_ENSMUST00000000939	-0.686707	4.80474	-5.08429	0.000958467	0.0284298	-0.284687
Clta_ENSMUST00000107851	0.298606	7.83568	5.05879	0.000989143	0.0292537	-0.599192
Hdac2_ENSMUST00000019911	-0.281267	8.04577	-5.04911	0.00100107	0.0295167	-0.616886
Wdr90_ENSMUST00000079461	-0.600258	4.75034	-5.04684	0.00100389	0.0295167	-0.327277
Zswim8_ENSMUST00000022358	-0.57635	4.8078	-5.04399	0.00100744	0.0295351	-0.334169
Dhcr24_ENSMUST00000047973	-0.366772	7.91829	-5.02719	0.00102866	0.0300698	-0.640176
Fanca_ENSMUST00000035495	-0.497586	6.29719	-5.01384	0.00104588	0.0304846	-0.528528
Slc25a3_ENSMUST00000076694	-0.285394	9.25321	-5.00856	0.00105277	0.0305051	-0.69168
Atr_ENSMUST00000215311	-0.706959	7.30923	-5.00706	0.00105473	0.0305051	-0.628786
Plk4_ENSMUST00000026858	-0.586511	4.50609	-5.0018	0.00106167	0.0305051	-0.36945
Cad_ENSMUST00000013773	-0.279875	9.99488	-5.00158	0.00106195	0.0305051	-0.704284
Utp6_ENSMUST00000108241	-0.292672	7.67956	-5.00115	0.00106252	0.0305051	-0.664387
Ubr1_ENSMUST00000028728	-0.397555	6.95315	-4.99907	0.00106528	0.0305051	-0.616114
Slc38a10_ENSMUST00000103018	-0.514409	5.72144	-4.99721	0.00106775	0.0305051	-0.48131
Aars2_ENSMUST00000024733	-0.413169	5.66413	-4.98382	0.00108573	0.030931	-0.49318
Kdm5c_ENSMUST00000112588	-0.305653	7.50189	-4.97741	0.00109446	0.0310919	-0.685805
Cit_ENSMUST00000051704	-0.521395	7.38994	-4.97	0.00110464	0.0312928	-0.68561
Nbas_ENSMUST00000042953	-0.414177	6.44616	-4.95872	0.00112034	0.0316488	-0.617728
Wdr11_ENSMUST00000084519	-0.443032	6.17297	-4.93667	0.00115173	0.0323645	-0.613897
Ift80_ENSMUST00000169064	-0.842969	4.00054	-4.93642	0.00115209	0.0323645	-0.442859
Flot2_ENSMUST00000100784	-0.606579	4.64769	-4.91471	0.00118396	0.0331673	-0.480531
Bdp1_ENSMUST00000038104	-0.560477	5.35334	-4.91166	0.00118851	0.0332026	-0.546172
Chd6_ENSMUST00000039782	-0.439654	6.02775	-4.89113	0.00121964	0.033728	-0.655515
Dhx57_ENSMUST00000038166	-0.454435	4.9088	-4.89102	0.00121981	0.033728	-0.529732
Cdk5rap1_ENSMUST00000109731	-0.344976	5.93951	-4.88967	0.00122191	0.033728	-0.648158
Mta1_ENSMUST00000109726	-0.357114	6.56024	-4.88793	0.00122458	0.033728	-0.722942
Gnpat_ENSMUST00000034466	-0.397132	5.86762	-4.88747	0.0012253	0.033728	-0.641269
Me1_ENSMUST00000034989	-0.615117	4.82572	-4.88437	0.00123011	0.033728	-0.529592
Xpo6_ENSMUST00000009344	-0.39498	6.22243	-4.88397	0.00123073	0.033728	-0.689017
Skiv2l_ENSMUST00000046022	-0.393066	5.7831	-4.87544	0.00124405	0.0340007	-0.646111
Ciao1_ENSMUST00000003759	-0.320295	6.14943	-4.87055	0.00125177	0.0341193	-0.699159
Fam120a_ENSMUST00000060805	-0.335396	6.18946	-4.86434	0.00126164	0.0342956	-0.711728
Acaca_ENSMUST00000103201	-0.495435	8.12643	-4.86155	0.0012661	0.0343241	-0.864537
Sik3_ENSMUST00000126865	-0.382652	5.70504	-4.85629	0.00127456	0.034461	-0.661177
Myh14_ENSMUST00000107899	-0.551797	4.74486	-4.84908	0.00128626	0.0346132	-0.5677
Pald1_ENSMUST00000020289	-0.388479	7.20856	-4.84581	0.0012916	0.0346132	-0.838075
Ints8_ENSMUST00000044616	-0.307485	6.9025	-4.84437	0.00129396	0.0346132	-0.815245
Zfp654_ENSMUST00000207826	-0.403618	6.11727	-4.84366	0.00129513	0.0346132	-0.728511
Tbrg4_ENSMUST00000189268	-0.348411	6.4587	-4.84231	0.00129735	0.0346132	-0.77173
Nup43_ENSMUST00000040135	-0.391999	7.5025	-4.83895	0.00130289	0.0346333	-0.867193
Tmem135_ENSMUST00000041968	-0.399197	5.48311	-4.83694	0.00130622	0.0346333	-0.658436
Dnpep_ENSMUST00000066668	-0.330114	6.72163	-4.83455	0.00131019	0.0346333	-0.810414
Strip1_ENSMUST00000064759	-0.367578	5.94686	-4.83199	0.00131445	0.0346333	-0.72349
Shmt2_ENSMUST00000026470	-0.274121	8.84892	-4.8315	0.00131528	0.0346333	-0.921484
Tubgcp5_ENSMUST00000032627	-0.463934	5.39628	-4.8279	0.0013213	0.0347014	-0.658598
Hk2_ENSMUST00000000642	-0.304784	8.08977	-4.81993	0.00133475	0.0349102	-0.92018
Rab3gap1_ENSMUST00000037649	-0.337458	6.00044	-4.81909	0.00133618	0.0349102	-0.747467
Chd9_ENSMUST00000048665	-0.429378	6.00974	-4.81686	0.00133997	0.034919	-0.74982
Nemf_ENSMUST00000021368	-0.353011	7.15377	-4.81042	0.00135101	0.0351146	-0.881216
Nat10_ENSMUST00000028608	-0.488631	7.85457	-4.80842	0.00135445	0.0351146	-0.924977
Cdc42bpg_ENSMUST00000025681	-0.68191	4.19057	-4.79015	0.00138636	0.0357227	-0.612568
Nacc1_ENSMUST00000001975	-0.426299	7.46204	-4.78906	0.00138829	0.0357227	-0.930792
Tubgcp3_ENSMUST00000000776	-0.493132	4.84428	-4.78764	0.00139082	0.0357227	-0.652485
Top2b_ENSMUST00000017629	-0.419372	7.14763	-4.78693	0.00139207	0.0357227	-0.911013
Rnf213_ENSMUST00000093902	-0.832371	6.95168	-4.78148	0.0014018	0.0358024	-0.893155
Tubgcp6_ENSMUST00000109353	-1.00489	3.72853	-4.78121	0.00140227	0.0358024	-0.634172
Glud1_ENSMUST00000022322	-0.279507	9.20441	-4.77858	0.00140701	0.0358325	-0.996395
Usp32_ENSMUST00000108075	-0.503529	4.79693	-4.77274	0.00141754	0.0360097	-0.66684
Sbf1_ENSMUST00000123791	-0.734315	4.71141	-4.76498	0.00143168	0.0362635	-0.666993
Dock7_ENSMUST00000205650	-0.476155	6.41034	-4.76333	0.00143472	0.0362635	-0.867805
Pitrm1_ENSMUST00000222485	-0.276526	8.19044	-4.75997	0.0014409	0.0363242	-1.00379
B4galnt3_ENSMUST00000057283	-0.41812	5.53376	-4.7575	0.00144546	0.0363242	-0.766871
Tubgcp2_ENSMUST00000026547	-0.418527	6.1206	-4.75617	0.00144792	0.0363242	-0.843466
Ube4b_ENSMUST00000103212	-0.35471	8.00652	-4.74751	0.00146409	0.0366385	-1.014
Trappc11_ENSMUST00000039061	-0.302987	6.83515	-4.73462	0.00148851	0.0370933	-0.954765
Nol10_ENSMUST00000046011	-0.355806	7.46601	-4.73261	0.00149236	0.0370933	-1.00756
Rnf185_ENSMUST00000077078	0.501608	4.28567	4.73212	0.0014933	0.0370933	-0.687998
Tyw1_ENSMUST00000040213	-0.384341	6.25692	-4.72631	0.00150449	0.0372795	-0.900383
Tbck_ENSMUST00000169172	-0.460188	4.64504	-4.72401	0.00150894	0.0372981	-0.716226
Tsn_ENSMUST00000027623	0.281702	7.46288	4.71797	0.0015207	0.0374969	-1.03159
Cox6a1_ENSMUST00000040154	0.279016	7.70751	4.71132	0.00153377	0.0377271	-1.0538
Ints7_ENSMUST00000045450	-0.301425	6.96209	-4.70885	0.00153867	0.0377555	-1.00132
Nbea_ENSMUST00000029374	-0.73665	4.52445	-4.70179	0.00155272	0.0379968	-0.733336
Gcat_ENSMUST00000006544	-1.06491	3.07328	-4.70013	0.00155604	0.0379968	-0.793472
Xpo5_ENSMUST00000087031	-0.3074	8.43355	-4.69275	0.00157093	0.0382677	-1.10064
Plrg1_ENSMUST00000150268	-0.254483	7.79068	-4.68689	0.00158286	0.0384654	-1.08787
Lyst_ENSMUST00000110559	-0.609648	4.07986	-4.68039	0.0015962	0.0386965	-0.742634
Mtmr4_ENSMUST00000103179	-0.514388	5.66251	-4.67547	0.00160638	0.0388497	-0.888352
Wipi2_ENSMUST00000110778	-0.381152	6.26715	-4.66545	0.00162735	0.0392627	-0.98258
Gak_ENSMUST00000046603	-0.474171	6.16371	-4.64453	0.00167207	0.0402454	-0.995304
Tle4_ENSMUST00000052011	-0.28323	7.20876	-4.6425	0.00167647	0.0402552	-1.11199
Ltn1_ENSMUST00000039449	-0.355658	7.68394	-4.63689	0.00168873	0.0404044	-1.14952
Cnih4_ENSMUST00000134115	0.308861	6.18697	4.63599	0.0016907	0.0404044	-1.01899
Fancd2_ENSMUST00000036340	-0.354137	7.67364	-4.63025	0.00170335	0.0405802	-1.15805
Gbf1_ENSMUST00000026254	-0.563428	6.33602	-4.62901	0.0017061	0.0405802	-1.03627
Parn_ENSMUST00000058884	-0.34267	6.5863	-4.62058	0.00172491	0.0409096	-1.08114
Plxna1_ENSMUST00000163139	-0.390172	6.89837	-4.61918	0.00172806	0.0409096	-1.11498
Ndufb6_ENSMUST00000095128	0.270189	7.13057	4.60891	0.00175131	0.0413164	-1.155
Ptk2_ENSMUST00000110036	-0.414831	5.99658	-4.60798	0.00175344	0.0413164	-1.02416
Gli3_ENSMUST00000110510	-0.685294	4.14764	-4.59247	0.00178926	0.0420621	-0.850531
Dsp_ENSMUST00000124830	-0.335873	6.25173	-4.58894	0.00179751	0.042158	-1.08403
Atp9a_ENSMUST00000029060	-0.539128	4.97629	-4.58608	0.00180425	0.0422178	-0.92109
Med23_ENSMUST00000020159	-0.382689	6.67099	-4.58199	0.0018139	0.0422673	-1.1421
Nhsl1_ENSMUST00000037341	-0.952785	3.22014	-4.58163	0.00181475	0.0422673	-0.900743
Usp36_ENSMUST00000092382	-0.520517	6.23715	-4.57783	0.0018238	0.0423803	-1.09373
Aqr_ENSMUST00000043160	-0.535503	8.76021	-4.57482	0.00183098	0.0424492	-1.26701
Pwp2_ENSMUST00000042556	-0.345298	7.64216	-4.56719	0.00184936	0.0427088	-1.24258
Fastkd3_ENSMUST00000051784	-0.534801	4.78903	-4.5656	0.0018532	0.0427088	-0.928155
Kank2_ENSMUST00000034717	-0.584718	7.19593	-4.56491	0.00185488	0.0427088	-1.21213
Cdc7_ENSMUST00000031221	-0.438616	5.44686	-4.56167	0.00186278	0.0427668	-1.01134
Timeless_ENSMUST00000055539	-0.548433	7.00287	-4.56039	0.00186588	0.0427668	-1.20215
Mrps9_ENSMUST00000057208	-0.394435	6.5412	-4.54803	0.00189637	0.043271	-1.17365
Btbd9_ENSMUST00000168787	-0.545713	5.68859	-4.54799	0.00189646	0.043271	-1.06013
Pfkl_ENSMUST00000020522	-0.244938	8.56633	-4.54146	0.00191278	0.0435448	-1.31046
Nek4_ENSMUST00000228328	-0.622158	3.90556	-4.53718	0.00192355	0.0436915	-0.913584
Actr5_ENSMUST00000045644	-0.654154	4.09931	-4.53206	0.00193655	0.0438879	-0.923282
Jarid2_ENSMUST00000173246	-0.288334	9.67388	-4.52779	0.00194743	0.0440354	-1.3413
Chml_ENSMUST00000104984	-1.04994	2.24645	-4.52088	0.00196522	0.0441553	-1.14468
Sbno1_ENSMUST00000065263	-0.484889	7.94477	-4.52079	0.00196546	0.0441553	-1.31938
Xpot_ENSMUST00000218004	-0.336739	7.7836	-4.52063	0.00196586	0.0441553	-1.31391
Cinp_ENSMUST00000043716	0.520758	4.47904	4.51853	0.00197131	0.0441793	-0.965899
Cluh_ENSMUST00000092915	-0.377823	7.3402	-4.51656	0.00197642	0.0441956	-1.29251
Syncrip_ENSMUST00000069221	0.243913	9.25332	4.51073	0.00199166	0.0443541	-1.36279
Phka2_ENSMUST00000112377	-0.483377	4.70757	-4.51048	0.00199231	0.0443541	-0.991932
Maco1_ENSMUST00000030628	-0.352338	6.84723	-4.50766	0.00199973	0.0443544	-1.26261
Zranb3_ENSMUST00000112538	-0.484307	5.60586	-4.50713	0.00200112	0.0443544	-1.10436
Dync2h1_ENSMUST00000140466	-0.780392	4.47223	-4.5041	0.00200911	0.0444339	-0.976322
Gli2_ENSMUST00000062483	-0.329181	6.45054	-4.50094	0.0020175	0.0445219	-1.2279
Stt3b_ENSMUST00000035010	-0.266571	7.95395	-4.49862	0.0020237	0.0445612	-1.35224
Nefl_ENSMUST00000022639	-0.488982	5.11877	-4.49551	0.00203201	0.0445879	-1.05574
Haus6_ENSMUST00000070607	-0.413084	6.60578	-4.49486	0.00203376	0.0445879	-1.25301
Map4k5_ENSMUST00000049239	-0.411169	5.32447	-4.49256	0.00203994	0.0446265	-1.08715
Als2_ENSMUST00000027178	-0.507004	5.90751	-4.4879	0.00205252	0.0447036	-1.17087
Eif2ak1_ENSMUST00000100487	-0.360399	5.50865	-4.48553	0.00205895	0.0447036	-1.12219
Zfp553_ENSMUST00000106312	0.304935	6.44384	4.48282	0.00206634	0.0447036	-1.25748
Nsfl1c_ENSMUST00000089140	0.251361	7.72517	4.48241	0.00206747	0.0447036	-1.36752
Kif24_ENSMUST00000108055	-0.593855	4.02127	-4.48141	0.0020702	0.0447036	-0.983561
Ranbp6_ENSMUST00000099525	-0.492054	4.62114	-4.47998	0.00207411	0.0447036	-1.02284
Eml4_ENSMUST00000049503	-0.279378	7.14297	-4.47971	0.00207485	0.0447036	-1.32932
Arl6ip1_ENSMUST00000032888	0.256369	8.86898	4.47822	0.00207893	0.0447036	-1.40369
Ndufa12_ENSMUST00000020209	0.2754	6.8895	4.47402	0.00209051	0.0448569	-1.31768
Itgav_ENSMUST00000028499	-0.287802	7.12477	-4.47136	0.00209788	0.0449121	-1.33912
Abcg1_ENSMUST00000024829	-0.442389	5.15922	-4.46988	0.00210198	0.0449121	-1.09539
Ipo9_ENSMUST00000041023	-0.254685	7.73986	-4.46434	0.00211747	0.0451473	-1.39041
Cdc23_ENSMUST00000133181	-0.289281	7.49092	-4.45864	0.00213352	0.0453094	-1.38398
Man2a1_ENSMUST00000086723	-0.558932	5.75637	-4.45845	0.00213406	0.0453094	-1.18916
Sema4d_ENSMUST00000021900	-0.324931	6.06378	-4.45553	0.00214233	0.0453894	-1.24035
Eif4ebp1_ENSMUST00000033880	0.258697	7.40587	4.45331	0.00214864	0.0454278	-1.38957
Utp15_ENSMUST00000040972	-0.282096	7.08662	-4.44817	0.00216332	0.0455215	-1.36791
Taok2_ENSMUST00000117394	-0.415728	5.05741	-4.44767	0.00216476	0.0455215	-1.11252
Tmc6_ENSMUST00000026659	-0.544504	4.9617	-4.44702	0.00216661	0.0455215	-1.10006
Adgrl1_ENSMUST00000141158	-0.354324	6.2773	-4.43168	0.00221121	0.0461614	-1.30047
Lrig3_ENSMUST00000074807	-0.392439	5.96163	-4.43011	0.00221583	0.0461614	-1.25948
Cpsf1_ENSMUST00000071898	-0.291687	8.02032	-4.42948	0.00221766	0.0461614	-1.45052
Ndufs1_ENSMUST00000027111	-0.344335	8.53419	-4.42911	0.00221878	0.0461614	-1.46528
Exoc4_ENSMUST00000052266	-0.258164	7.65203	-4.42871	0.00221996	0.0461614	-1.4353
Vps33a_ENSMUST00000031388	-0.457105	5.09618	-4.42682	0.00222552	0.0461733	-1.14426
Fblim1_ENSMUST00000105785	0.29725	8.2839	4.42542	0.00222969	0.0461733	-1.46618
Dhx40_ENSMUST00000018569	-0.295737	6.69288	-4.42115	0.00224237	0.0463408	-1.36603
2700049A03Rik_ENSMUST00000149564	-0.39344	5.8665	-4.41806	0.00225162	0.0464367	-1.26278
Adam23_ENSMUST00000087374	-0.283501	7.4631	-4.41617	0.00225728	0.0464584	-1.4412
Gnptab_ENSMUST00000020251	-0.405605	4.88512	-4.41091	0.00227315	0.0466899	-1.14072
Mmut_ENSMUST00000169611	-0.26937	7.19171	-4.40835	0.00228092	0.0467542	-1.43224
Psip1_ENSMUST00000030207	0.223657	9.21187	4.40528	0.00229027	0.0468506	-1.50919
Lmo7_ENSMUST00000100337	-0.483664	4.49883	-4.40033	0.00230544	0.0470655	-1.11464
Ell_ENSMUST00000093454	-0.489597	4.67911	-4.39157	0.00233253	0.0475224	-1.14316
Nuf2_ENSMUST00000111368	-0.366311	5.99563	-4.38927	0.00233971	0.0475588	-1.32086
Ankrd11_ENSMUST00000098334	-0.312648	7.71551	-4.38797	0.00234375	0.0475588	-1.49496
Copg2_ENSMUST00000048774	-0.442709	7.19621	-4.38458	0.0023544	0.0476789	-1.46318
Pfkp_ENSMUST00000138703	-0.325508	8.91225	-4.38284	0.00235986	0.0476938	-1.53647
Hadhb_ENSMUST00000026841	-0.254474	7.56675	-4.37813	0.00237478	0.0477717	-1.50107
Sec23ip_ENSMUST00000042942	-0.271422	7.30814	-4.37747	0.00237688	0.0477717	-1.48434
Cox6c_ENSMUST00000014457	0.283111	7.68832	4.37714	0.00237793	0.0477717	-1.51235
Jmy_ENSMUST00000065537	-0.589764	4.74457	-4.36849	0.00240559	0.0482098	-1.17834
Snrpa_ENSMUST00000080356	0.256177	8.19211	4.36734	0.00240929	0.0482098	-1.545
Pds5b_ENSMUST00000016569	-0.272541	7.24366	-4.36531	0.00241584	0.048245	-1.49641
Trappc10_ENSMUST00000000384	-0.845372	3.41295	-4.36187	0.00242701	0.0483487	-1.13498
Sf1_ENSMUST00000131252	0.22327	9.39729	4.36076	0.00243062	0.0483487	-1.5731
Med24_ENSMUST00000017354	-0.289905	6.62183	-4.3547	0.00245043	0.0486469	-1.45016
Btbd7_ENSMUST00000223554	-0.639212	3.61051	-4.34962	0.00246717	0.048883	-1.14191
Dlg5_ENSMUST00000090398	-0.408715	5.09163	-4.34461	0.00248379	0.0490746	-1.25389
Paip2_ENSMUST00000041314	0.261338	7.06542	4.34378	0.00248658	0.0490746	-1.51505
Eif4b_ENSMUST00000169681	0.226858	9.66894	4.33457	0.00251752	0.0495882	-1.61146
Fastkd5_ENSMUST00000110262	-0.500409	6.05598	-4.32827	0.00253889	0.0499117	-1.41016
Arfgef1_ENSMUST00000088615	-0.387228	5.55562	-4.32411	0.00255314	0.0500942	-1.3461
Smyd5_ENSMUST00000045693	-0.293806	6.55918	-4.31454	0.00258623	0.0506166	-1.49871
C2cd3_ENSMUST00000051777	-0.435142	4.74108	-4.31314	0.00259112	0.0506166	-1.25318
Ociad1_ENSMUST00000031038	0.263055	7.60649	4.31014	0.00260161	0.0506166	-1.60205
Lmtk2_ENSMUST00000041804	-0.254301	6.85722	-4.30737	0.00261132	0.0506166	-1.54243
Agpat5_ENSMUST00000149565	-0.277396	6.71992	-4.30603	0.00261602	0.0506166	-1.52928
Mto1_ENSMUST00000034896	-0.556161	4.82307	-4.30464	0.00262093	0.0506166	-1.2718
Depdc5_ENSMUST00000119705	-0.526918	5.06517	-4.3033	0.00262569	0.0506166	-1.30362
Dazap2_ENSMUST00000000356	0.343535	5.58962	4.30329	0.00262571	0.0506166	-1.3862
Ncoa4_ENSMUST00000163336	-0.228876	8.38205	-4.30147	0.00263217	0.0506166	-1.64148
Ncor2_ENSMUST00000086083	-0.30204	6.27019	-4.30082	0.00263448	0.0506166	-1.48132
Heatr5a_ENSMUST00000040583	-0.539377	5.4048	-4.30068	0.00263498	0.0506166	-1.35397
Ccdc124_ENSMUST00000007865	0.432904	5.34042	4.29872	0.00264195	0.0506541	-1.35533
Mrto4_ENSMUST00000030513	0.257964	7.70297	4.29215	0.00266546	0.0509208	-1.6325
Nusap1_ENSMUST00000068225	0.240224	8.12948	4.2912	0.00266887	0.0509208	-1.65045
Atp5d_ENSMUST00000105367	0.258633	7.84144	4.29061	0.00267101	0.0509208	-1.64102
Hmgcr_ENSMUST00000022176	-0.367644	9.04033	-4.28573	0.00268864	0.0511603	-1.67487
Fbh1_ENSMUST00000071564	-0.354808	5.15411	-4.28234	0.002701	0.0512457	-1.34665
Wdr36_ENSMUST00000053663	-0.260771	8.47489	-4.28171	0.00270329	0.0512457	-1.67149
Ints9_ENSMUST00000043914	-0.283895	6.70058	-4.27838	0.00271548	0.0513801	-1.56584
Sik2_ENSMUST00000041375	-0.428769	4.68257	-4.27614	0.00272373	0.0514397	-1.29564
Ubqln2_ENSMUST00000060714	0.246447	8.08902	4.27467	0.00272914	0.0514457	-1.67259
Mink1_ENSMUST00000102559	-0.592223	4.9221	-4.26343	0.00277093	0.0521359	-1.3381
Isyna1_ENSMUST00000210005	-0.415964	7.59109	-4.25527	0.00280175	0.0524028	-1.67338
Mon2_ENSMUST00000037557	-0.467633	6.08883	-4.25502	0.00280268	0.0524028	-1.51706
Stk40_ENSMUST00000094761	-0.721083	3.22667	-4.25472	0.00280383	0.0524028	-1.27066
Plcb3_ENSMUST00000025912	-0.330312	6.99972	-4.25417	0.0028059	0.0524028	-1.63037
Pltp_ENSMUST00000059954	-0.276979	7.66157	-4.24833	0.00282821	0.0527218	-1.68901
Pold3_ENSMUST00000032969	-0.332919	6.40745	-4.24608	0.00283687	0.0527849	-1.57519
Melk_ENSMUST00000045607	-0.256594	7.59043	-4.24319	0.002848	0.0527849	-1.69244
Mtmr2_ENSMUST00000034396	-0.403242	5.49258	-4.24264	0.00285012	0.0527849	-1.44798
Dido1_ENSMUST00000087517	-0.221119	8.08887	-4.24202	0.00285253	0.0527849	-1.71722
Rb1cc1_ENSMUST00000027040	-0.434146	5.98819	-4.23729	0.0028709	0.0530276	-1.52771
Pqbp1_ENSMUST00000033497	0.345943	5.87353	4.23573	0.00287698	0.0530426	-1.52212
Man2c1_ENSMUST00000160147	-0.369292	5.35741	-4.23293	0.00288793	0.0530822	-1.44223
Zfc3h1_ENSMUST00000036044	-0.481456	5.6331	-4.23164	0.002893	0.0530822	-1.4825
Rtel1_ENSMUST00000054622	-0.396901	5.1357	-4.23115	0.00289491	0.0530822	-1.41281
Abcc4_ENSMUST00000036554	-0.237818	8.18583	-4.22895	0.00290359	0.0531447	-1.73885
Ranbp2_ENSMUST00000003310	-0.345887	9.52427	-4.22447	0.00292134	0.0533727	-1.76629
Gon4l_ENSMUST00000107498	-0.43468	5.3577	-4.21481	0.00295994	0.0539195	-1.46617
Kif15_ENSMUST00000040717	-0.434575	7.83756	-4.2112	0.00297453	0.0539195	-1.74907
Zfp7_ENSMUST00000023179	-0.514181	5.49253	-4.21052	0.00297728	0.0539195	-1.49031
Kif22_ENSMUST00000032915	-0.220636	8.05519	-4.20949	0.00298149	0.0539195	-1.76234
Cnn3_ENSMUST00000029773	0.215889	8.96378	4.20941	0.00298179	0.0539195	-1.78342
Arhgef2_ENSMUST00000029694	-0.509188	6.95187	-4.20865	0.00298487	0.0539195	-1.68697
Bub3_ENSMUST00000084502	-0.285391	7.91449	-4.20771	0.0029887	0.0539195	-1.75888
Gtf3c4_ENSMUST00000037117	-0.308978	6.18953	-4.20286	0.00300854	0.0541806	-1.60712
Shcbp1_ENSMUST00000022945	-0.276634	7.04368	-4.18751	0.00307216	0.0552223	-1.72971
Paxip1_ENSMUST00000002291	-0.315176	5.8817	-4.18622	0.00307757	0.0552223	-1.58609
Gnb1_ENSMUST00000165335	-0.222443	7.74589	-4.18344	0.00308928	0.0552223	-1.78631
Dcaf15_ENSMUST00000210279	-0.309708	6.18552	-4.18342	0.00308935	0.0552223	-1.6341
Oxa1l_ENSMUST00000000985	-0.285749	7.22843	-4.18238	0.00309377	0.0552223	-1.75297
Pes1_ENSMUST00000020705	-0.268467	8.57205	-4.17622	0.00311989	0.0555902	-1.82373
Map1a_ENSMUST00000094639	-0.402755	6.24086	-4.16783	0.00315591	0.0560558	-1.66152
Tbl3_ENSMUST00000126319	-0.293755	7.70518	-4.16667	0.00316089	0.0560558	-1.80749
Zfp292_ENSMUST00000047950	-0.450062	7.62336	-4.16626	0.00316269	0.0560558	-1.80159
Slc16a6_ENSMUST00000070152	-0.413706	4.8736	-4.16225	0.00318006	0.0562498	-1.47115
Nup37_ENSMUST00000052355	-0.238312	7.22994	-4.16117	0.00318479	0.0562498	-1.78401
Fmc1_ENSMUST00000019833	0.38566	5.10458	4.15156	0.00322699	0.0568204	-1.52241
Syde2_ENSMUST00000039517	-1.0512	3.76777	-4.15124	0.00322837	0.0568204	-1.3861
Ssr1_ENSMUST00000021864	0.229753	8.26337	4.14638	0.00324996	0.0570444	-1.8605
Tmem47_ENSMUST00000026760	0.44379	4.89224	4.1447	0.00325746	0.0570444	-1.50248
Hnrnpa2b1_ENSMUST00000090002	0.238753	10.369	4.14456	0.00325806	0.0570444	-1.88292
Nkrf_ENSMUST00000057093	-0.406016	6.11837	-4.13955	0.00328055	0.0573386	-1.6845
Stk11_ENSMUST00000003152	-0.519135	3.87593	-4.13458	0.00330298	0.0576046	-1.41382
Ap4e1_ENSMUST00000002063	-0.477924	4.92805	-4.13365	0.0033072	0.0576046	-1.51639
Polrmt_ENSMUST00000020580	-0.45592	5.76806	-4.13086	0.00331989	0.0577261	-1.64386
Ddx10_ENSMUST00000065630	-0.270484	7.61998	-4.1285	0.00333068	0.0577486	-1.85764
Sbf2_ENSMUST00000033058	-0.351278	5.55486	-4.12807	0.00333264	0.0577486	-1.61727
Ist1_ENSMUST00000034164	0.318983	6.44348	4.12483	0.00334749	0.0579065	-1.7568
Slc16a1_ENSMUST00000046212	-0.24761	8.80291	-4.11723	0.00338269	0.0584151	-1.91266
Atp11c_ENSMUST00000101527	-0.392445	5.29094	-4.11403	0.00339759	0.0584506	-1.59571
Armcx4_ENSMUST00000124226	-0.558476	5.38874	-4.11391	0.00339816	0.0584506	-1.60721
Nadk2_ENSMUST00000100789	-0.455591	5.31627	-4.11306	0.00340213	0.0584506	-1.59943
Vcl_ENSMUST00000022369	0.228455	9.2298	4.10613	0.00343471	0.05891	-1.93449
Polr3a_ENSMUST00000026322	-0.342255	7.02258	-4.09879	0.00346964	0.059408	-1.85332
Rnf40_ENSMUST00000205694	-0.301751	6.37841	-4.09568	0.00348452	0.0594668	-1.78441
Ube3b_ENSMUST00000074002	-0.691012	4.52071	-4.09477	0.00348891	0.0594668	-1.51471
Notch3_ENSMUST00000087723	-0.276289	6.51756	-4.09438	0.00349076	0.0594668	-1.80435
Sucla2_ENSMUST00000160507	-0.406916	7.25075	-4.09123	0.00350596	0.0595986	-1.88334
Mms19_ENSMUST00000171561	-0.355266	6.97277	-4.09022	0.00351085	0.0595986	-1.86062
Dctpp1_ENSMUST00000035276	0.275649	6.67936	4.08911	0.00351623	0.0595986	-1.83582
Zzef1_ENSMUST00000069395	-0.636955	5.38397	-4.08506	0.00353595	0.0597583	-1.64565
Edf1_ENSMUST00000015236	0.241256	6.72257	4.08474	0.0035375	0.0597583	-1.84688
Snrpc_ENSMUST00000232873	0.283137	6.79389	4.08222	0.00354985	0.0598666	-1.85847
Dse_ENSMUST00000048010	-0.378486	5.96727	-4.07905	0.00356539	0.0600283	-1.74839
Hs6st1_ENSMUST00000088174	-0.495847	4.66027	-4.07659	0.00357754	0.0601324	-1.55955
Phf23_ENSMUST00000018716	0.286179	6.5433	4.07413	0.00358969	0.0601432	-1.84135
Eml5_ENSMUST00000223282	-0.89861	3.26651	-4.07405	0.0035901	0.0601432	-1.48549
Fancb_ENSMUST00000167446	-0.709228	3.72504	-4.07102	0.00360518	0.0602956	-1.4879
Sptlc1_ENSMUST00000021920	-0.384875	6.46089	-4.06931	0.00361372	0.0603383	-1.8309
Dhx34_ENSMUST00000163968	-0.623983	3.29745	-4.05978	0.00366165	0.0610376	-1.50043
Erlin2_ENSMUST00000033873	-0.311014	5.85973	-4.05812	0.00367006	0.0610768	-1.76311
Zfr_ENSMUST00000122941	-0.283539	7.57687	-4.05645	0.00367856	0.0611174	-1.95856
Zbtb11_ENSMUST00000050248	-0.558007	6.2697	-4.05436	0.00368922	0.0611937	-1.82298
Nek9_ENSMUST00000040992	-0.471132	5.72229	-4.05287	0.00369685	0.0612196	-1.74556
Fmnl2_ENSMUST00000049483	-0.388168	5.58585	-4.0508	0.00370746	0.0612946	-1.72918
Plce1_ENSMUST00000182481	-1.39959	2.17981	-4.04772	0.00372328	0.0614554	-1.63874
Rhobtb2_ENSMUST00000022665	-1.07141	2.66683	-4.0462	0.00373114	0.0614846	-1.566
Ppif_ENSMUST00000022419	0.281708	6.0584	4.04238	0.00375095	0.0617102	-1.8218
Ptpn4_ENSMUST00000064091	-0.778538	2.99052	-4.03871	0.00377008	0.0618654	-1.54084
Sfr1_ENSMUST00000099353	0.228377	7.73512	4.03822	0.00377266	0.0618654	-1.99722
Ttn_ENSMUST00000111846	-1.01255	6.32653	-4.03568	0.00378594	0.0619825	-1.84443
Calm1_ENSMUST00000110082	0.237619	7.55832	4.03228	0.00380384	0.0621746	-1.99622
Ppan_ENSMUST00000004203	-0.294317	7.63388	-4.02937	0.00381925	0.0622267	-2.00109
Map3k4_ENSMUST00000089058	-0.446488	6.16903	-4.02935	0.00381937	0.0622267	-1.84651
Gramd1a_ENSMUST00000001280	-0.601006	3.97876	-4.02188	0.00385918	0.0627738	-1.56437
Gabpa_ENSMUST00000009120	0.224119	8.04642	4.01775	0.00388138	0.0630334	-2.0397
Ncapg_ENSMUST00000117396	-0.227474	8.46867	-4.01095	0.00391825	0.0634401	-2.06013
Stil_ENSMUST00000030490	-0.452378	4.75433	-4.01081	0.003919	0.0634401	-1.66142
Nufip1_ENSMUST00000022586	0.232288	7.61726	4.00918	0.00392789	0.0634803	-2.03309
Jag2_ENSMUST00000075827	-0.554553	4.12908	-4.00805	0.00393408	0.0634803	-1.59509
Dcaf11_ENSMUST00000117236	-0.586409	3.70904	-4.0028	0.00396291	0.0637294	-1.57492
Apaf1_ENSMUST00000020157	-0.520918	4.93684	-4.00181	0.00396839	0.0637294	-1.69785
Pds5a_ENSMUST00000201948	-0.29798	8.1631	-4.00132	0.0039711	0.0637294	-2.06539
Med14_ENSMUST00000096495	-0.335148	5.5972	-4.00024	0.00397706	0.0637294	-1.80329
Hspb1_ENSMUST00000005077	0.219749	9.33214	3.99936	0.00398196	0.0637294	-2.09013
Alg8_ENSMUST00000098300	-0.440614	4.81383	-3.99837	0.00398743	0.0637294	-1.68659
Mrpl50_ENSMUST00000057829	0.313711	6.12964	3.99681	0.0039961	0.0637669	-1.89734
Lrrc59_ENSMUST00000021239	0.250688	8.07093	3.9903	0.00403253	0.0642466	-2.08047
Cdc42bpa_ENSMUST00000111117	-0.574899	3.90876	-3.98397	0.0040683	0.0647142	-1.60944
Slx4_ENSMUST00000040790	-0.609301	3.66026	-3.98025	0.00408945	0.0648588	-1.60206
Atp5j2_ENSMUST00000161741	0.241224	7.5272	3.9791	0.004096	0.0648588	-2.07145
Rwdd1_ENSMUST00000019917	0.26922	6.17356	3.97898	0.00409668	0.0648588	-1.92914
Stk11ip_ENSMUST00000027414	-0.536913	4.08317	-3.97646	0.00411114	0.0649856	-1.63286
Atp5o_ENSMUST00000023677	0.236287	7.59673	3.97419	0.00412418	0.0650897	-2.0828
Med30_ENSMUST00000037115	0.3695	5.13304	3.96772	0.00416162	0.0655781	-1.7814
Emsy_ENSMUST00000205276	-0.352947	5.45252	-3.96384	0.00418422	0.0658312	-1.83127
Vps8_ENSMUST00000117598	-0.375246	5.81572	-3.95913	0.00421187	0.0661631	-1.89569
Mrps31_ENSMUST00000033934	0.230825	7.14486	3.9568	0.00422564	0.0662762	-2.07453
Sparc_ENSMUST00000214685	0.222859	7.51788	3.94812	0.00427727	0.0669818	-2.11595
Adam19_ENSMUST00000011400	-0.386641	5.79669	-3.94491	0.00429651	0.0671788	-1.91298
Mapk7_ENSMUST00000079080	-0.534632	4.28465	-3.9438	0.00430322	0.0671796	-1.6954
Ndufa9_ENSMUST00000205002	-0.275711	7.78827	-3.94004	0.00432596	0.0674301	-2.13955
Dtnb_ENSMUST00000077930	-0.407376	4.92495	-3.93781	0.00433945	0.0675361	-1.78651
Nes_ENSMUST00000090973	-0.409184	4.69722	-3.93491	0.00435717	0.0677073	-1.75887
Trpm4_ENSMUST00000042194	-0.386461	4.65375	-3.93083	0.00438215	0.0679907	-1.75912
Ulk1_ENSMUST00000031490	-0.600992	6.92899	-3.92457	0.00442081	0.0684851	-2.09113
Adck5_ENSMUST00000162503	-0.533765	4.77104	-3.92246	0.0044339	0.0685826	-1.78365
Ppp6r1_ENSMUST00000064099	-0.296663	6.16203	-3.92066	0.00444514	0.0686512	-2.00534
Dock9_ENSMUST00000040700	-0.559936	4.8618	-3.91392	0.00448741	0.0690264	-1.80795
Rrp12_ENSMUST00000038677	-0.230958	8.08745	-3.91214	0.00449865	0.0690264	-2.19345
Fig4_ENSMUST00000043814	-0.297045	6.80263	-3.91091	0.00450643	0.0690264	-2.10258
Itpa_ENSMUST00000103193	0.2781	6.88687	3.91083	0.00450693	0.0690264	-2.11623
Ppip5k2_ENSMUST00000112845	-0.354035	5.73674	-3.91022	0.00451078	0.0690264	-1.95374
Esrrb_ENSMUST00000110204	0.205186	9.17372	3.90971	0.00451402	0.0690264	-2.21988
Naa16_ENSMUST00000022597	-0.351016	6.17472	-3.90919	0.00451734	0.0690264	-2.02243
Uqcrc1_ENSMUST00000026743	-0.223492	9.13932	-3.90261	0.00455931	0.0694093	-2.22942
Cep350_ENSMUST00000138762	-0.484875	4.87157	-3.90237	0.00456084	0.0694093	-1.82681
Wdr12_ENSMUST00000027173	-0.255057	7.78856	-3.90203	0.00456305	0.0694093	-2.19544
Tex14_ENSMUST00000060835	-0.706264	6.34618	-3.89727	0.0045937	0.0697703	-2.05566
Arhgap39_ENSMUST00000077821	-0.525994	3.75659	-3.8927	0.00462338	0.0701086	-1.72023
Rsbn1_ENSMUST00000051139	-0.345372	5.36894	-3.8917	0.00462988	0.0701086	-1.92028
Pdcl3_ENSMUST00000027247	0.331119	6.10659	3.88632	0.0046651	0.0705062	-2.05305
Calm2_ENSMUST00000040440	0.216219	8.19093	3.88519	0.0046725	0.0705062	-2.23797
H4c14_ENSMUST00000171473	0.312082	6.89614	3.88388	0.00468116	0.0705062	-2.15653
Lama5_ENSMUST00000015791	-0.250916	9.57139	-3.88276	0.00468851	0.0705062	-2.26206
Wdr45b_ENSMUST00000026173	-0.407572	5.61578	-3.88237	0.00469109	0.0705062	-1.9726
Cdc16_ENSMUST00000043962	-0.315225	6.42757	-3.8789	0.00471414	0.0706868	-2.10234
Mtmr14_ENSMUST00000113146	-0.374247	5.23975	-3.87634	0.00473115	0.0706868	-1.92141
Taf10_ENSMUST00000141116	0.262738	6.48789	3.8752	0.0047388	0.0706868	-2.12153
Rabl6_ENSMUST00000058137	-0.486518	4.83219	-3.87457	0.00474301	0.0706868	-1.85989
Extl3_ENSMUST00000022550	-0.631354	4.3308	-3.87402	0.00474664	0.0706868	-1.79312
Fmnl3_ENSMUST00000088233	-0.503089	4.76576	-3.87383	0.00474797	0.0706868	-1.85081
Park7_ENSMUST00000105675	0.204531	8.12678	3.87226	0.00475845	0.0706868	-2.25504
Map4k4_ENSMUST00000192509	-0.391581	7.13081	-3.87083	0.00476805	0.0706868	-2.19329
Pdcd10_ENSMUST00000161137	0.236989	6.97013	3.87065	0.00476931	0.0706868	-2.18353
Armcx5_ENSMUST00000096321	-0.573549	3.17849	-3.87007	0.0047732	0.0706868	-1.73614
H3f3b_ENSMUST00000106454	0.222617	8.5568	3.86598	0.00480085	0.0709921	-2.27519
Myo1g_ENSMUST00000003459	-0.481533	3.66884	-3.86219	0.00482659	0.0712323	-1.75541
Hmox1_ENSMUST00000005548	0.288243	6.9751	3.86151	0.00483122	0.0712323	-2.19749
Uqcrc2_ENSMUST00000033176	-0.241632	8.62048	-3.85489	0.00487661	0.0717965	-2.29191
Gmnn_ENSMUST00000110382	0.25439	7.40154	3.85249	0.00489321	0.0718296	-2.24814
Dennd4b_ENSMUST00000098914	-0.8823	2.74026	-3.85246	0.00489338	0.0718296	-1.77942
Taf1c_ENSMUST00000093099	-0.433107	4.89304	-3.85148	0.00490022	0.0718296	-1.90197
Usp38_ENSMUST00000042724	-0.356482	6.05097	-3.84818	0.0049231	0.0720601	-2.09234
Mybbp1a_ENSMUST00000045633	-0.236498	10.381	-3.84482	0.00494658	0.072299	-2.31954
Ppox_ENSMUST00000073120	-0.684165	2.91981	-3.84183	0.00496754	0.072397	-1.77943
Rab5a_ENSMUST00000017975	-0.277023	6.45438	-3.83999	0.00498048	0.072397	-2.16336
Cxadr_ENSMUST00000023572	0.333492	5.86965	3.83978	0.00498196	0.072397	-2.08352
Atp11a_ENSMUST00000091237	-0.501847	4.70476	-3.83978	0.00498201	0.072397	-1.89059
Oplah_ENSMUST00000023222	-0.628306	3.04282	-3.83333	0.00502769	0.0729101	-1.78468
Ptcd3_ENSMUST00000082094	-0.323758	7.44021	-3.83276	0.00503177	0.0729101	-2.27537
Gldc_ENSMUST00000025778	-0.497811	8.81908	-3.82966	0.00505386	0.073125	-2.33187
Ppp2ca_ENSMUST00000020608	0.21077	8.60183	3.82554	0.00508347	0.0734481	-2.33576
Noc4l_ENSMUST00000042147	-0.22512	7.30769	-3.82293	0.00510232	0.0735845	-2.28105
Myo5c_ENSMUST00000036555	-0.583035	4.07869	-3.82222	0.0051075	0.0735845	-1.83841
Cdk13_ENSMUST00000042365	-0.249801	6.51654	-3.82034	0.00512108	0.0736395	-2.2008
Rad23b_ENSMUST00000030134	0.200847	8.83693	3.8183	0.00513592	0.0736395	-2.35051
Ndufa7_ENSMUST00000048249	0.299633	6.76995	3.81791	0.00513877	0.0736395	-2.23936
Stt3a_ENSMUST00000120381	-0.350497	9.01903	-3.81767	0.00514053	0.0736395	-2.353
Dock6_ENSMUST00000217336	-0.599586	7.36103	-3.81643	0.00514962	0.0736651	-2.28908
Tsc1_ENSMUST00000028155	-0.550097	4.04362	-3.81052	0.00519297	0.07418	-1.85074
Rtcb_ENSMUST00000001834	-0.250833	8.12229	-3.80797	0.0052118	0.0743437	-2.34799
Vcp_ENSMUST00000030164	0.208734	10.2886	3.80394	0.00524173	0.074665	-2.38051
Dhx30_ENSMUST00000197928	-0.260789	7.02136	-3.80038	0.00526827	0.0749372	-2.28817
Nampt_ENSMUST00000020886	-0.239657	7.56664	-3.79704	0.00529337	0.0751883	-2.33773
Bckdhb_ENSMUST00000034801	-0.352553	6.10343	-3.78951	0.00535035	0.0757885	-2.18583
Chm_ENSMUST00000026607	-0.385227	5.48437	-3.78947	0.00535066	0.0757885	-2.08498
Tspyl1_ENSMUST00000061372	0.230003	6.55216	3.78546	0.00538128	0.0761153	-2.26093
Tpd52l2_ENSMUST00000069712	0.228724	6.63716	3.78398	0.00539264	0.0761691	-2.27352
Shroom2_ENSMUST00000101141	-0.346902	5.52264	-3.78153	0.00541146	0.0762253	-2.10335
Mapk1ip1l_ENSMUST00000166743	0.209446	7.81852	3.78136	0.00541276	0.0762253	-2.37759
Twnk_ENSMUST00000026227	-0.465438	4.7971	-3.78052	0.00541929	0.0762253	-1.9869
Dennd4c_ENSMUST00000142837	-0.383771	6.01322	-3.77574	0.00545625	0.0766382	-2.19097
Sh3tc1_ENSMUST00000201511	-0.668406	3.11148	-3.77434	0.00546713	0.0766844	-1.85625
Exosc3_ENSMUST00000030003	0.266469	6.21732	3.7732	0.00547609	0.0767032	-2.23401
Arrdc2_ENSMUST00000002989	-0.903799	1.68838	-3.77134	0.00549062	0.0768002	-1.9899
Cox6b1_ENSMUST00000075738	0.222799	7.10833	3.76578	0.00553431	0.0772311	-2.35145
Mlh1_ENSMUST00000035079	-0.330721	6.15571	-3.76525	0.00553845	0.0772311	-2.22926
Atp6v0a4_ENSMUST00000040259	-0.512373	4.68262	-3.76443	0.00554494	0.0772311	-1.99177
Nt5c2_ENSMUST00000168536	-0.316288	6.54305	-3.76277	0.00555813	0.0772311	-2.28758
Map3k5_ENSMUST00000095806	-0.920446	3.00444	-3.76257	0.00555972	0.0772311	-1.87408
Myo19_ENSMUST00000093969	-0.648909	3.10647	-3.75958	0.00558343	0.0773425	-1.87473
Swi5_ENSMUST00000183946	0.292522	6.9317	3.75944	0.00558456	0.0773425	-2.34319
Sf3a3_ENSMUST00000030734	0.220188	8.59303	3.75866	0.00559075	0.0773425	-2.43479
Selenoh_ENSMUST00000117299	0.340251	4.94434	3.75678	0.00560584	0.077445	-2.04978
Fam50a_ENSMUST00000114160	0.256145	7.02104	3.75467	0.00562269	0.0775716	-2.35943
Cyfip2_ENSMUST00000093165	-0.653847	5.24803	-3.75026	0.00565826	0.0779006	-2.09612
Sf3b2_ENSMUST00000025774	0.204007	9.12402	3.74887	0.00566945	0.0779006	-2.45728
Suz12_ENSMUST00000017692	-0.31931	7.85768	-3.74884	0.00566971	0.0779006	-2.42436
Grpel2_ENSMUST00000062991	0.400282	5.06159	3.74771	0.00567888	0.0779204	-2.08117
Pebp1_ENSMUST00000036951	0.201744	8.42418	3.74448	0.00570515	0.0781745	-2.45226
Ptpn13_ENSMUST00000048957	-0.672325	4.51965	-3.74118	0.00573212	0.0784374	-1.99861
Ptpn14_ENSMUST00000097442	-0.715221	4.5582	-3.73744	0.00576289	0.078473	-2.00767
Nsmce1_ENSMUST00000033006	0.28518	6.70962	3.73687	0.00576758	0.078473	-2.35173
Sympk_ENSMUST00000023882	-0.240664	7.40326	-3.7367	0.005769	0.078473	-2.41588
Pycr2_ENSMUST00000027802	-0.234547	7.2681	-3.73616	0.00577338	0.078473	-2.40607
Ppp2r1a_ENSMUST00000007708	0.223004	9.07645	3.73563	0.00577781	0.078473	-2.4765
Pcx_ENSMUST00000224726	-0.714808	5.66166	-3.73519	0.0057814	0.078473	-2.1845
Carmil2_ENSMUST00000213019	-0.749929	3.15551	-3.73263	0.00580262	0.0786551	-1.90821
Ipp_ENSMUST00000030461	-0.537098	3.86252	-3.72806	0.00584071	0.0790651	-1.94567
Ppp6r3_ENSMUST00000025846	-0.279458	8.29979	-3.72676	0.0058516	0.0791064	-2.47408
Chsy1_ENSMUST00000036372	-0.669011	3.87645	-3.72286	0.00588436	0.0794399	-1.95188
Ddx24_ENSMUST00000044923	-0.222958	8.05855	-3.72037	0.00590541	0.0794399	-2.476
Cog4_ENSMUST00000034203	-0.222466	6.59251	-3.71921	0.00591522	0.0794399	-2.35965
Phrf1_ENSMUST00000106027	-0.281004	6.81395	-3.71899	0.00591707	0.0794399	-2.38587
Xpo4_ENSMUST00000174545	-0.476835	7.75059	-3.71884	0.00591835	0.0794399	-2.46166
H2az2_ENSMUST00000109737	0.232167	6.56134	3.71756	0.00592924	0.0794399	-2.36219
Scyl1_ENSMUST00000025890	-0.420944	5.1716	-3.7173	0.00593141	0.0794399	-2.1361
Atp6v0e_ENSMUST00000015719	0.259571	5.78623	3.71493	0.00595163	0.0795564	-2.25133
Poc1a_ENSMUST00000072206	-0.338463	5.03555	-3.71443	0.00595588	0.0795564	-2.11954
Tra2a_ENSMUST00000031841	0.22296	7.80329	3.71219	0.00597498	0.0797059	-2.47976
Ttc28_ENSMUST00000156290	-0.731599	2.6742	-3.70809	0.00601026	0.0800706	-1.95388
Ndufc2_ENSMUST00000032882	0.267385	7.007	3.70345	0.00605041	0.0803934	-2.43401
Cmtm6_ENSMUST00000035007	0.248344	5.93216	3.70344	0.00605043	0.0803934	-2.29226
Capn7_ENSMUST00000022451	-0.308782	5.47355	-3.70247	0.00605888	0.0803998	-2.21022
Dus1l_ENSMUST00000167023	-0.289559	5.72286	-3.7003	0.0060778	0.0804649	-2.2561
Topors_ENSMUST00000042575	-0.332278	7.51432	-3.69982	0.00608201	0.0804649	-2.47754
Ppp2r2a_ENSMUST00000089230	-0.265931	7.78143	-3.69892	0.00608983	0.0804649	-2.49547
Bzw1_ENSMUST00000050552	0.198366	9.0905	3.69825	0.00609571	0.0804649	-2.53246
Ndufv1_ENSMUST00000042497	-0.24846	8.00155	-3.69588	0.00611648	0.0806336	-2.51012
Ywhaq_ENSMUST00000135088	0.225265	8.54605	3.69059	0.00616312	0.0811424	-2.53538
Pdia3_ENSMUST00000028683	0.197546	10.0861	3.68541	0.00620913	0.0816415	-2.55713
Tmem131l_ENSMUST00000191758	-0.423143	5.48054	-3.68242	0.0062359	0.0818868	-2.23838
Klhl24_ENSMUST00000023509	-0.263448	6.27894	-3.67842	0.00627186	0.0821653	-2.37651
Inppl1_ENSMUST00000035836	-0.300495	5.51553	-3.67825	0.0062734	0.0821653	-2.25259
Helb_ENSMUST00000020449	-0.269031	7.20872	-3.67586	0.006295	0.0823412	-2.49026
Exoc2_ENSMUST00000021785	-0.280789	6.39352	-3.67447	0.00630758	0.0823989	-2.39842
Gcc2_ENSMUST00000057659	-0.341383	5.92853	-3.67137	0.00633579	0.0825469	-2.33171
Eif6_ENSMUST00000029142	-0.221759	7.40961	-3.67052	0.00634356	0.0825469	-2.51512
Rangap1_ENSMUST00000230726	0.252006	6.41803	3.67029	0.00634571	0.0825469	-2.41345
Tle3_ENSMUST00000160882	-0.336837	5.99168	-3.66964	0.00635165	0.0825469	-2.34444
Actr6_ENSMUST00000020109	-0.313714	5.68478	-3.66147	0.00642679	0.0834159	-2.30619
Tsg101_ENSMUST00000014546	0.243275	6.88669	3.66042	0.00643652	0.0834348	-2.48533
Crybg3_ENSMUST00000172910	-0.369948	5.54179	-3.65952	0.00644483	0.0834353	-2.28315
Atp5g2_ENSMUST00000185641	0.218277	8.50278	3.65513	0.00648575	0.0838141	-2.58755
Ints13_ENSMUST00000032427	-0.265241	6.38618	-3.65319	0.00650396	0.0838141	-2.42932
Garem1_ENSMUST00000049260	-0.62791	2.83563	-3.65294	0.0065063	0.0838141	-2.01281
Pcid2_ENSMUST00000164416	-0.2658	6.34729	-3.65224	0.00651281	0.0838141	-2.42501
Dnm2_ENSMUST00000174050	-0.235602	6.87317	-3.65185	0.00651655	0.0838141	-2.493
Zer1_ENSMUST00000113677	-0.636199	3.98368	-3.65106	0.00652395	0.0838141	-2.05922
Dcaf13_ENSMUST00000022909	-0.319629	7.74942	-3.64748	0.00655768	0.0839992	-2.57013
Qtrt2_ENSMUST00000023387	-0.321849	5.12299	-3.64687	0.00656351	0.0839992	-2.23099
Fermt2_ENSMUST00000045905	-0.243881	7.66239	-3.64607	0.00657111	0.0839992	-2.56817
Csnk1g2_ENSMUST00000085435	-0.586843	3.41854	-3.64567	0.00657483	0.0839992	-2.02535
Rapgef5_ENSMUST00000109691	-0.516602	3.93619	-3.64513	0.00658	0.0839992	-2.06435
Eif1ax_ENSMUST00000087143	0.260006	7.2619	3.64173	0.00661236	0.0842282	-2.54983
Chtop_ENSMUST00000049937	0.217322	7.20356	3.64084	0.00662089	0.0842282	-2.54602
Bsg_ENSMUST00000067036	0.214263	8.6657	3.64062	0.006623	0.0842282	-2.6126
Gnl2_ENSMUST00000030684	-0.247567	8.40161	-3.63884	0.00664004	0.0842395	-2.60853
Chd8_ENSMUST00000200169	-0.39089	7.9864	-3.63766	0.00665135	0.0842395	-2.59548
Lsm10_ENSMUST00000055575	0.65101	2.46166	3.63712	0.0066565	0.0842395	-2.04911
Plxnb2_ENSMUST00000109331	-0.377741	5.55592	-3.63704	0.0066573	0.0842395	-2.31838
Fastkd2_ENSMUST00000027103	-0.56869	5.84273	-3.63535	0.00667354	0.0842586	-2.36481
Tenm3_ENSMUST00000033965	-0.254694	6.90142	-3.63514	0.00667552	0.0842586	-2.5207
Htatsf1_ENSMUST00000088652	0.287331	6.52473	3.63396	0.00668694	0.0842973	-2.48159
Zdhhc5_ENSMUST00000035840	-0.375599	5.30589	-3.63076	0.00671796	0.0845826	-2.2846
Rbmxl2_ENSMUST00000098135	0.261465	7.97321	3.62889	0.00673609	0.0847051	-2.61164
Atp5g3_ENSMUST00000018914	0.244106	8.80352	3.61882	0.00683494	0.0858096	-2.64774
Hip1_ENSMUST00000060311	-0.435797	4.62804	-3.61821	0.00684094	0.0858096	-2.19164
Snx13_ENSMUST00000048519	-0.602334	3.0446	-3.617	0.00685295	0.0858534	-2.05419
BC055324_ENSMUST00000045876	-0.290777	7.51951	-3.61261	0.00689664	0.0862936	-2.60886
Samd8_ENSMUST00000119430	-0.415595	4.43521	-3.61125	0.00691022	0.0863464	-2.17401
Phip_ENSMUST00000034787	-0.23877	7.22414	-3.60976	0.00692515	0.0863464	-2.59081
Snrpe_ENSMUST00000166915	0.259029	7.76397	3.60962	0.00692655	0.0863464	-2.63147
Polq_ENSMUST00000054034	-0.682382	2.416	-3.60483	0.00697467	0.086839	-2.09406
Zfp207_ENSMUST00000053740	0.223755	9.20457	3.60066	0.00701694	0.0871609	-2.68015
Slc26a2_ENSMUST00000146409	-0.410617	4.93111	-3.60058	0.00701782	0.0871609	-2.26471
Api5_ENSMUST00000028617	0.211092	8.37671	3.59832	0.00704082	0.087339	-2.67
Polr2j_ENSMUST00000041366	0.299635	5.89154	3.59668	0.00705758	0.0874394	-2.44288
Smndc1_ENSMUST00000025997	0.197745	7.37784	3.58967	0.00712968	0.0882243	-2.6371
Uqcr10_ENSMUST00000058407	0.279863	5.90866	3.585	0.00717817	0.0886171	-2.46301
Ercc3_ENSMUST00000025241	-0.26618	6.08432	-3.58395	0.00718912	0.0886171	-2.48712
Tfam_ENSMUST00000092430	0.223433	6.6767	3.58361	0.00719259	0.0886171	-2.57562
Arl14ep_ENSMUST00000028536	0.272265	5.83441	3.58323	0.00719657	0.0886171	-2.45306
Sptlc2_ENSMUST00000021424	-0.238799	7.08492	-3.58029	0.0072274	0.0888882	-2.62219
Mtmr9_ENSMUST00000058679	-0.360121	6.44002	-3.57449	0.0072885	0.0893942	-2.55183
Setdb2_ENSMUST00000161459	-0.495451	4.01579	-3.57434	0.00729007	0.0893942	-2.17059
Kank1_ENSMUST00000049400	-0.868787	4.45735	-3.57386	0.00729514	0.0893942	-2.21916
Utp4_ENSMUST00000047629	-0.190704	8.51999	-3.57107	0.00732478	0.0895529	-2.71357
Smarce1_ENSMUST00000103133	0.256874	6.77069	3.57044	0.00733152	0.0895529	-2.60667
Ubr3_ENSMUST00000055758	-0.458649	7.72545	-3.57014	0.00733472	0.0895529	-2.68326
Ska1_ENSMUST00000177604	0.344743	5.74459	3.56587	0.00738033	0.0900008	-2.46324
Cbx6_ENSMUST00000109627	-0.522162	3.66711	-3.56446	0.00739548	0.0900766	-2.14939
Vapa_ENSMUST00000024897	0.245221	8.37584	3.56308	0.00741035	0.0901358	-2.72313
Snrpd3_ENSMUST00000020397	0.216262	7.83823	3.56177	0.00742449	0.0901358	-2.70692
Acox1_ENSMUST00000066587	-0.363411	4.80204	-3.56089	0.00743398	0.0901358	-2.30161
Esyt2_ENSMUST00000220816	-0.357891	5.98072	-3.5607	0.00743609	0.0901358	-2.5027
Top1_ENSMUST00000109468	0.224772	8.35592	3.55912	0.00745322	0.0902349	-2.72862
Lig4_ENSMUST00000095476	-0.424901	4.16009	-3.55543	0.00749328	0.0905761	-2.21531
Nipbl_ENSMUST00000052965	-0.186865	7.86269	-3.55487	0.00749936	0.0905761	-2.71629
Pdcd6ip_ENSMUST00000035086	-0.197391	7.36634	-3.55185	0.00753246	0.0906821	-2.6901
Rbpms_ENSMUST00000033995	0.219712	7.00963	3.55114	0.00754024	0.0906821	-2.66188
Mesd_ENSMUST00000094215	0.265307	6.94894	3.55072	0.00754484	0.0906821	-2.65617
Plec_ENSMUST00000076442	-0.36282	6.02905	-3.55061	0.00754609	0.0906821	-2.52567
Mga_ENSMUST00000110774	-0.401646	9.15734	-3.54997	0.00755309	0.0906821	-2.75519
Zfp715_ENSMUST00000107986	-0.321083	5.3868	-3.5484	0.00757032	0.0907789	-2.41961
Mrps36_ENSMUST00000109333	0.329751	5.02854	3.5476	0.00757916	0.0907789	-2.36404
Abce1_ENSMUST00000080536	-0.228412	9.16799	-3.54405	0.00761841	0.0910532	-2.76466
Gpam_ENSMUST00000061856	-0.468691	4.7566	-3.54186	0.00764281	0.0910532	-2.31987
Mpdu1_ENSMUST00000018905	0.226278	7.0406	3.53988	0.00766493	0.0910532	-2.68196
Tmem230_ENSMUST00000028816	0.352406	4.73235	3.53933	0.00767104	0.0910532	-2.32734
Pcnx3_ENSMUST00000113615	-0.295458	5.30604	-3.53879	0.00767713	0.0910532	-2.42006
Hmgb3_ENSMUST00000072699	0.251472	5.81453	3.53867	0.00767839	0.0910532	-2.51561
Thoc2_ENSMUST00000047037	-0.215077	7.64079	-3.53832	0.00768234	0.0910532	-2.72923
Coro7_ENSMUST00000038552	-0.451839	5.39537	-3.53792	0.00768676	0.0910532	-2.43365
Pomp_ENSMUST00000031654	0.256426	7.36803	3.537	0.00769717	0.0910532	-2.71578
Oser1_ENSMUST00000104954	0.267441	5.84076	3.53437	0.00772666	0.0910532	-2.52654
Prex2_ENSMUST00000027056	-0.579982	3.95333	-3.53401	0.00773075	0.0910532	-2.21763
Mapre1_ENSMUST00000028981	0.203317	7.48173	3.53359	0.00773552	0.0910532	-2.72919
Slc4a11_ENSMUST00000099362	-0.362243	4.98343	-3.53323	0.00773957	0.0910532	-2.37138
Txndc17_ENSMUST00000021158	0.256049	6.2545	3.53297	0.0077425	0.0910532	-2.59484
Dock1_ENSMUST00000084488	-0.445372	6.21188	-3.53247	0.00774819	0.0910532	-2.57958
Hk1_ENSMUST00000116238	-0.371781	6.75157	-3.53222	0.00775091	0.0910532	-2.65573
Imp3_ENSMUST00000034827	0.25236	6.31308	3.53181	0.00775555	0.0910532	-2.6051
Abi1_ENSMUST00000123948	0.305761	5.74376	3.53062	0.00776901	0.0911052	-2.51534
Serac1_ENSMUST00000024570	-0.541297	3.90451	-3.52862	0.00779177	0.0911517	-2.22008
Akap12_ENSMUST00000045730	-0.241002	10.7657	-3.52791	0.00779986	0.0911517	-2.79256
Itpr3_ENSMUST00000049308	-0.460063	7.664	-3.52789	0.00780009	0.0911517	-2.74313
Rbm12_ENSMUST00000109604	0.210227	7.96112	3.52647	0.0078162	0.0912343	-2.76543
Ube2n_ENSMUST00000099329	0.225763	7.63789	3.52474	0.00783601	0.0913597	-2.75252
Pmf1_ENSMUST00000056370	0.240892	6.39623	3.52355	0.00784955	0.0914119	-2.62909
Thumpd1_ENSMUST00000033236	0.21427	7.33096	3.52029	0.00788708	0.091743	-2.73799
Dab2ip_ENSMUST00000112992	-0.421932	4.88416	-3.50957	0.00801146	0.0930824	-2.38809
Rfx7_ENSMUST00000093820	-0.303064	5.32546	-3.50523	0.00806247	0.0935673	-2.47243
Pdlim1_ENSMUST00000068439	0.242877	7.64059	3.50402	0.00807674	0.0936252	-2.78405
Ywhab_ENSMUST00000018470	0.203032	8.03881	3.50273	0.00809202	0.0936946	-2.8043
Igfbp2_ENSMUST00000047328	0.207682	9.37314	3.50188	0.00810207	0.0937035	-2.83097
Pcdhgb8_ENSMUST00000208907	-0.800707	2.54692	-3.49719	0.00815777	0.0940949	-2.21517
Numa1_ENSMUST00000209639	-0.226976	7.25892	-3.497	0.00816009	0.0940949	-2.76371
Rims3_ENSMUST00000071093	-0.928016	2.16949	-3.49592	0.00817306	0.0940949	-2.24431
Eif4h_ENSMUST00000036125	0.195314	8.19007	3.4959	0.00817324	0.0940949	-2.81963
Lonp1_ENSMUST00000047226	-0.21729	8.11142	-3.49231	0.00821628	0.0944826	-2.82097
Hexb_ENSMUST00000022169	-0.292906	8.08694	-3.48898	0.00825649	0.0947551	-2.8246
Eif3m_ENSMUST00000028592	0.231808	9.09907	3.48836	0.0082639	0.0947551	-2.84893
Tent4a_ENSMUST00000044081	-0.545785	3.75532	-3.48801	0.00826817	0.0947551	-2.2609
Tmem167_ENSMUST00000161568	0.329794	4.94245	3.48501	0.0083045	0.0950635	-2.44045
Arhgap5_ENSMUST00000219443	-0.234856	6.97062	-3.48325	0.00832601	0.0951557	-2.75654
Smn1_ENSMUST00000022147	0.223267	6.94845	3.48225	0.00833822	0.0951557	-2.75925
Pop1_ENSMUST00000052290	-0.245902	7.61334	-3.48203	0.00834087	0.0951557	-2.81235
Uhmk1_ENSMUST00000027979	-0.716952	2.97872	-3.47923	0.00837515	0.0952948	-2.22892
Elavl1_ENSMUST00000098950	0.235928	8.12642	3.47877	0.00838077	0.0952948	-2.8437
Adgra3_ENSMUST00000030971	-0.409085	4.95051	-3.47872	0.0083814	0.0952948	-2.44454
Ttc21b_ENSMUST00000102718	-0.648288	4.60714	-3.47783	0.00839234	0.0953117	-2.38387
St13_ENSMUST00000172107	0.221596	9.3921	3.47672	0.00840602	0.095338	-2.86933
Carm1_ENSMUST00000034703	-0.245623	7.30594	-3.47611	0.00841356	0.095338	-2.79908
Crk_ENSMUST00000017920	0.27092	5.57827	3.47441	0.00843453	0.0953619	-2.56914
Sbds_ENSMUST00000026387	0.213897	6.63901	3.47441	0.00843459	0.0953619	-2.73491
Rbm3_ENSMUST00000040010	0.228785	8.23561	3.47264	0.00845649	0.0955025	-2.85635
Med4_ENSMUST00000022705	0.287678	5.93022	3.4713	0.00847303	0.0955406	-2.63572
Usp6nl_ENSMUST00000042503	-0.562623	3.47945	-3.47076	0.00847979	0.0955406	-2.26027
Rapgef1_ENSMUST00000102872	-0.371885	5.04442	-3.4695	0.00849543	0.0955406	-2.4744
Rhbdf1_ENSMUST00000020524	-0.898711	3.2638	-3.46932	0.00849776	0.0955406	-2.24841
Cwc15_ENSMUST00000004200	0.2303	6.5659	3.46825	0.00851107	0.0955742	-2.73496
Ubqln1_ENSMUST00000076454	0.232909	8.44838	3.46703	0.00852627	0.0955742	-2.87038
Chaf1b_ENSMUST00000023666	-0.224051	7.40239	-3.4665	0.00853293	0.0955742	-2.82154
Tanc1_ENSMUST00000037526	-0.432455	6.88798	-3.46594	0.00853997	0.0955742	-2.77077
Wdr81_ENSMUST00000173320	-0.501341	4.33535	-3.46529	0.00854813	0.0955742	-2.36485
Dolk_ENSMUST00000100219	-0.576103	3.48683	-3.46125	0.00859893	0.0960357	-2.27381
Usp53_ENSMUST00000090379	-0.49767	3.4259	-3.45953	0.0086206	0.0961529	-2.27253
Cblb_ENSMUST00000114471	0.357057	5.07563	3.45891	0.0086285	0.0961529	-2.50153
Mnat1_ENSMUST00000021523	0.285107	7.0918	3.45788	0.00864161	0.0961927	-2.811
Sipa1l1_ENSMUST00000166429	-0.34184	4.62629	-3.45556	0.00867107	0.0964143	-2.42567
Epm2aip1_ENSMUST00000135807	-0.335241	5.52395	-3.45476	0.00868119	0.0964205	-2.58165
Pcsk6_ENSMUST00000055576	-0.477106	5.50729	-3.45338	0.00869889	0.0964916	-2.57766
Ercc2_ENSMUST00000062831	-0.413163	4.77109	-3.45276	0.00870673	0.0964916	-2.45187
Ipo13_ENSMUST00000036156	-0.581329	4.29146	-3.45003	0.0087417	0.0967728	-2.37868
Caskin2_ENSMUST00000041684	-0.831091	3.25304	-3.44653	0.00878685	0.097166	-2.27758
Cnnm2_ENSMUST00000099373	-0.275427	5.68757	-3.44208	0.00884454	0.0976969	-2.63108
Hdgf_ENSMUST00000005017	0.213922	7.9932	3.43987	0.00887329	0.0978277	-2.89807
Dazap1_ENSMUST00000105362	0.196272	7.88861	3.43929	0.00888085	0.0978277	-2.89466
Slbp_ENSMUST00000057551	0.272257	7.93444	3.43847	0.00889157	0.0978277	-2.89798
Zdhhc6_ENSMUST00000224897	-0.403454	4.30325	-3.43791	0.00889887	0.0978277	-2.40078
Phc3_ENSMUST00000168645	-1.07811	2.07204	-3.43744	0.00890504	0.0978277	-2.3194
Hdac3_ENSMUST00000043498	-0.313201	5.75638	-3.43537	0.00893223	0.0978277	-2.65217
H4f16_ENSMUST00000179285	0.212486	7.55187	3.43505	0.00893645	0.0978277	-2.88319
Dcaf6_ENSMUST00000027856	-0.517891	3.60767	-3.43378	0.00895306	0.0978277	-2.32129
Baz1a_ENSMUST00000173433	-0.370339	6.28546	-3.43351	0.00895662	0.0978277	-2.74085
Cars2_ENSMUST00000049461	-0.442873	4.39977	-3.43292	0.0089644	0.0978277	-2.42178
Emc7_ENSMUST00000069747	0.345423	5.46288	3.4323	0.00897267	0.0978277	-2.61065
Ptprk_ENSMUST00000166468	-0.239996	7.75865	-3.43229	0.0089728	0.0978277	-2.89633
Taf5l_ENSMUST00000165628	-0.232583	6.17056	-3.42791	0.00903084	0.0980338	-2.73424
Cops4_ENSMUST00000045993	0.194414	7.58856	3.42719	0.00904032	0.0980338	-2.89743
Fam120c_ENSMUST00000073364	-0.65056	2.82617	-3.42664	0.00904768	0.0980338	-2.29532
Setd5_ENSMUST00000042889	-0.327467	6.77758	-3.42663	0.00904778	0.0980338	-2.81893
Supv3l1_ENSMUST00000020273	-0.244806	6.4596	-3.42657	0.00904864	0.0980338	-2.77898
Maoa_ENSMUST00000026013	-0.437473	6.40735	-3.42646	0.00905003	0.0980338	-2.76797
Dctn4_ENSMUST00000025505	-0.262511	6.06819	-3.42413	0.00908121	0.0982441	-2.7233
Trak2_ENSMUST00000027186	-0.674994	3.26033	-3.42355	0.00908892	0.0982441	-2.30923
Bap1_ENSMUST00000022458	-0.402196	4.95448	-3.42276	0.00909944	0.0982526	-2.52666
Dhx32_ENSMUST00000063669	-0.243378	5.95717	-3.4216	0.00911507	0.0982811	-2.70896
Pex6_ENSMUST00000002840	-0.428259	4.88287	-3.42108	0.00912203	0.0982811	-2.51622
Celf1_ENSMUST00000005643	0.195604	8.15009	3.4199	0.00913789	0.0982811	-2.93394
Ctps_ENSMUST00000030381	-0.202832	7.83084	-3.41967	0.00914107	0.0982811	-2.9196
Phf5a_ENSMUST00000023117	0.230944	6.30542	3.41769	0.00916775	0.098463	-2.77532
Eif1_ENSMUST00000049385	0.245117	8.3453	3.41694	0.0091778	0.0984661	-2.94412
Rad17_ENSMUST00000022136	-0.300143	5.27114	-3.41399	0.0092178	0.0987901	-2.59748
Adamts9_ENSMUST00000113438	-0.531868	3.49812	-3.41118	0.00925612	0.0990956	-2.3425
Gen1_ENSMUST00000166117	-0.270282	5.50078	-3.40917	0.00928359	0.099104	-2.64659
Ppie_ENSMUST00000030404	0.233186	6.56437	3.40903	0.00928552	0.099104	-2.82421
Zfp382_ENSMUST00000098596	-0.704008	2.67692	-3.40896	0.0092864	0.099104	-2.31917
Sgta_ENSMUST00000005067	0.221832	6.70965	3.40668	0.00931774	0.0993334	-2.84603
Cap1_ENSMUST00000106257	0.181503	8.4373	3.40574	0.00933065	0.099366	-2.9634
Poldip3_ENSMUST00000058793	0.184234	8.28317	3.40047	0.00940342	0.0999388	-2.96751
Smarca5_ENSMUST00000043359	-0.359857	5.8306	-3.39936	0.00941887	0.0999388	-2.71861
Rev1_ENSMUST00000027251	-0.411446	6.15043	-3.39816	0.00943553	0.0999388	-2.77211
Chmp5_ENSMUST00000030128	0.236807	6.24312	3.39765	0.00944267	0.0999388	-2.79636
Ccnt1_ENSMUST00000169707	-0.274262	6.38532	-3.39756	0.00944384	0.0999388	-2.81173
Gm17655_ENSMUST00000210275	-0.763227	1.66537	-3.3975	0.00944469	0.0999388	-2.39662
Lsm7_ENSMUST00000035775	0.279133	6.26468	3.39685	0.0094538	0.0999388	-2.80085
Rasal2_ENSMUST00000078308	-0.450936	4.45739	-3.39456	0.00948585	0.100134	-2.48546
Wdr92_ENSMUST00000046955	-0.264007	6.02519	-3.39411	0.00949213	0.100134	-2.76143
Ltv1_ENSMUST00000019950	0.209355	7.11412	3.39322	0.00950461	0.10015	-2.91117
Gpr107_ENSMUST00000056433	-0.25214	6.60367	-3.39258	0.00951352	0.10015	-2.84964
Tpx2_ENSMUST00000178997	0.176842	8.90569	3.39021	0.00954687	0.100396	-2.99594
Cox11_ENSMUST00000020851	-0.480701	4.494	-3.38786	0.00958015	0.100575	-2.5002
Cks2_ENSMUST00000075853	0.226266	7.022	3.38702	0.00959196	0.100575	-2.91137
Cep192_ENSMUST00000025425	-0.481134	7.50042	-3.3869	0.00959373	0.100575	-2.94606
Bag4_ENSMUST00000038498	0.229414	6.04032	3.38576	0.00960994	0.10064	-2.7823
Dad1_ENSMUST00000022781	0.2444	6.77551	3.38436	0.00962981	0.100667	-2.88793
Ccp110_ENSMUST00000106557	-0.501793	4.60679	-3.38417	0.0096325	0.100667	-2.52345
Ripk4_ENSMUST00000019386	-0.438679	3.84364	-3.37995	0.00969274	0.101192	-2.42086
Nfx1_ENSMUST00000098143	0.239249	7.82352	3.3775	0.00972784	0.101202	-2.98597
Evi5_ENSMUST00000112642	-0.311386	5.18992	-3.37743	0.00972894	0.101202	-2.63651
Otud5_ENSMUST00000033494	0.237634	6.65296	3.37732	0.00973044	0.101202	-2.88356
Marf1_ENSMUST00000090300	-0.542264	4.87218	-3.37708	0.00973388	0.101202	-2.57687
Arfgef2_ENSMUST00000099078	-0.251803	6.37435	-3.37616	0.00974714	0.101236	-2.84277
Abcc5_ENSMUST00000079158	-0.360807	6.78186	-3.37414	0.00977628	0.101342	-2.89834
Fcf1_ENSMUST00000021669	0.2422	7.43919	3.37366	0.00978331	0.101342	-2.96898
Eloc_ENSMUST00000188641	0.239819	6.73017	3.37318	0.00979026	0.101342	-2.8994
Tipin_ENSMUST00000216594	0.215883	7.23894	3.37127	0.00981793	0.101342	-2.95633
Trim71_ENSMUST00000111816	-0.254212	7.73545	-3.3708	0.00982475	0.101342	-2.98866
Miga1_ENSMUST00000073089	-0.312488	6.01354	-3.37053	0.00982871	0.101342	-2.79384
Wwc2_ENSMUST00000057561	-0.358282	5.13335	-3.36972	0.00984047	0.101342	-2.63697
Mtfr1_ENSMUST00000130645	-0.358505	4.96288	-3.36932	0.00984622	0.101342	-2.60764
Dzip1_ENSMUST00000004055	-0.633548	2.878	-3.36921	0.00984783	0.101342	-2.36861
Banf1_ENSMUST00000025762	0.220908	7.13131	3.36655	0.00988669	0.101638	-2.9535
Rnf4_ENSMUST00000182709	0.211964	7.32829	3.36549	0.0099022	0.101694	-2.97273
Fmnl1_ENSMUST00000042286	-0.811319	2.49093	-3.36307	0.00993778	0.101896	-2.38089
Ppid_ENSMUST00000029382	0.246805	7.09968	3.36236	0.00994826	0.101896	-2.95684
Mrps18b_ENSMUST00000025305	0.223109	7.41198	3.36168	0.00995829	0.101896	-2.98513
Smim8_ENSMUST00000029972	0.556123	3.19719	3.36141	0.00996224	0.101896	-2.39132
Prkcsh_ENSMUST00000216344	0.19418	8.44014	3.35984	0.00998539	0.10198	-3.03362
Ybx3_ENSMUST00000032309	0.187952	8.55395	3.35948	0.00999069	0.10198	-3.03671
Tlnrd1_ENSMUST00000094216	-0.931216	2.10117	-3.35574	0.0100463	0.102351	-2.41141
Rcc1_ENSMUST00000105951	0.197386	7.44612	3.35567	0.0100473	0.102351	-2.99678
Rnf113a1_ENSMUST00000046433	0.522279	3.86909	3.35449	0.0100649	0.102426	-2.46534
Nup155_ENSMUST00000163765	-0.208229	9.46181	-3.35171	0.0101064	0.102745	-3.0602
Txn1_ENSMUST00000030051	0.211984	8.25646	3.34921	0.0101438	0.10292	-3.04515
Tufm_ENSMUST00000098048	-0.201894	7.82482	-3.34915	0.0101447	0.10292	-3.02692
Tmem209_ENSMUST00000115160	-0.420039	7.59946	-3.34838	0.0101563	0.10292	-3.01248
Recql_ENSMUST00000032370	-0.41999	5.68316	-3.34784	0.0101645	0.10292	-2.76826
Snu13_ENSMUST00000080622	0.213313	7.85794	3.34366	0.0102276	0.10334	-3.03925
Tbc1d31_ENSMUST00000022992	-0.282766	5.573	-3.34286	0.0102399	0.10334	-2.75842
Tasor_ENSMUST00000022450	-0.433082	7.70855	-3.34235	0.0102476	0.10334	-3.02841
Arpp19_ENSMUST00000168166	0.246825	6.44234	3.34173	0.010257	0.10334	-2.90978
Bcap31_ENSMUST00000002091	0.213085	7.94795	3.34172	0.0102571	0.10334	-3.04609
Champ1_ENSMUST00000051870	-0.224971	7.05817	-3.33979	0.0102865	0.103434	-2.98359
Mccc2_ENSMUST00000022148	-0.477337	5.50381	-3.33976	0.010287	0.103434	-2.74624
Ints3_ENSMUST00000029542	-0.280508	7.1867	-3.33817	0.0103112	0.103575	-2.99787
E2f7_ENSMUST00000073781	-0.312415	5.04301	-3.33684	0.0103316	0.103636	-2.66995
Kansl1_ENSMUST00000018556	-0.250354	5.77902	-3.33614	0.0103423	0.103636	-2.80628
Cog1_ENSMUST00000018805	-0.320261	5.52153	-3.33576	0.0103482	0.103636	-2.75863
Ift140_ENSMUST00000024983	-0.422445	5.30954	-3.33462	0.0103657	0.103646	-2.71945
Med8_ENSMUST00000019229	0.241409	5.71266	3.33436	0.0103698	0.103646	-2.80254
Bcr_ENSMUST00000164107	-0.392308	4.0674	-3.33233	0.0104011	0.103856	-2.51764
Rad50_ENSMUST00000020649	-0.694332	7.23053	-3.3285	0.0104603	0.104306	-3.00835
Clpb_ENSMUST00000209579	-0.194092	7.34599	-3.32744	0.0104768	0.104306	-3.02922
Nae1_ENSMUST00000034349	-0.269699	6.97022	-3.32741	0.0104772	0.104306	-2.99253
Chuk_ENSMUST00000026217	-0.494141	5.67334	-3.3265	0.0104913	0.104344	-2.79581
Ppm1a_ENSMUST00000021514	-0.291287	6.19505	-3.32386	0.0105327	0.104652	-2.89392
Xpo1_ENSMUST00000102869	-0.229279	10.4855	-3.32223	0.0105581	0.104801	-3.10738
Cmpk1_ENSMUST00000030491	0.266837	5.81402	3.31956	0.0106	0.105077	-2.84316
Cnot8_ENSMUST00000020822	-0.306918	6.35704	-3.31885	0.0106113	0.105077	-2.92585
Cul2_ENSMUST00000162301	-0.21789	8.23261	-3.31848	0.0106171	0.105077	-3.09016
Mllt6_ENSMUST00000044730	-0.548439	4.60146	-3.31765	0.0106303	0.105104	-2.61666
Eprs_ENSMUST00000046514	-0.180324	10.3097	-3.31644	0.0106493	0.105112	-3.11668
Pdp2_ENSMUST00000059588	-0.493729	4.98132	-3.31602	0.0106559	0.105112	-2.68577
Mtbp_ENSMUST00000022998	-0.246965	6.03176	-3.31562	0.0106623	0.105112	-2.88097
8030462N17Rik_ENSMUST00000074653	0.30178	5.88882	3.31248	0.0107122	0.105501	-2.86714
Ino80_ENSMUST00000049920	-0.410343	6.7478	-3.3094	0.0107613	0.105663	-2.99182
Myo6_ENSMUST00000035889	-0.497255	4.83709	-3.30807	0.0107826	0.105663	-2.67288
Tbc1d2b_ENSMUST00000041767	-0.706381	2.99648	-3.30777	0.0107875	0.105663	-2.45053
Aplf_ENSMUST00000032130	0.487601	3.65924	3.3076	0.0107901	0.105663	-2.50533
Bid_ENSMUST00000004560	0.322725	5.01258	3.30647	0.0108084	0.105663	-2.71474
Ppp6c_ENSMUST00000028087	0.215506	6.68817	3.30636	0.0108101	0.105663	-2.99584
Kif5b_ENSMUST00000025083	-0.216832	8.60484	-3.30625	0.0108119	0.105663	-3.11856
Cox8a_ENSMUST00000039758	0.235989	7.12214	3.30578	0.0108194	0.105663	-3.04541
Dennd4a_ENSMUST00000038890	-0.64748	3.13033	-3.30547	0.0108244	0.105663	-2.45902
Lrrc47_ENSMUST00000030894	0.221133	7.01393	3.30458	0.0108388	0.105663	-3.03621
Mrps14_ENSMUST00000135680	0.271682	6.32176	3.3028	0.0108675	0.105663	-2.95176
Pclaf_ENSMUST00000045802	0.287543	5.97551	3.30244	0.0108733	0.105663	-2.89732
Ranbp17_ENSMUST00000102815	-0.249208	6.21438	-3.30174	0.0108847	0.105663	-2.9312
Suclg1_ENSMUST00000064740	-0.222397	6.69697	-3.30134	0.0108911	0.105663	-3.00085
Gpaa1_ENSMUST00000023221	-0.487688	5.22737	-3.30113	0.0108945	0.105663	-2.75239
Hexa_ENSMUST00000026262	-0.297987	6.23945	-3.30102	0.0108964	0.105663	-2.93518
Tti1_ENSMUST00000029179	-0.413321	6.31574	-3.29784	0.0109479	0.106061	-2.94937
Senp3_ENSMUST00000066760	-0.306596	7.96721	-3.29719	0.0109585	0.106062	-3.1122
Psmd13_ENSMUST00000026560	0.188654	8.34808	3.29635	0.0109723	0.106094	-3.12866
Arfgef3_ENSMUST00000215836	-0.477939	3.78133	-3.29419	0.0110077	0.106334	-2.53262
Ccndbp1_ENSMUST00000060455	0.300096	4.8089	3.29229	0.0110388	0.106443	-2.69945
Ryr1_ENSMUST00000179893	-0.472245	4.4994	-3.29171	0.0110483	0.106443	-2.6399
Nop53_ENSMUST00000044158	0.189945	8.37204	3.29105	0.0110592	0.106443	-3.13743
Usp21_ENSMUST00000065941	-0.744925	2.91642	-3.29086	0.0110623	0.106443	-2.47005
Spint2_ENSMUST00000207601	0.267422	5.71669	3.29024	0.0110726	0.106443	-2.86968
Ints6_ENSMUST00000053959	-0.28661	7.60361	-3.28954	0.0110842	0.106443	-3.10481
Pars2_ENSMUST00000058905	-0.481814	3.69604	-3.28901	0.0110928	0.106443	-2.52996
Tnks2_ENSMUST00000025729	-0.234235	8.4456	-3.28784	0.0111121	0.106527	-3.14311
Trak1_ENSMUST00000045903	-0.534744	3.04457	-3.28296	0.0111933	0.107202	-2.48547
Arhgef10_ENSMUST00000084207	-0.487338	3.67067	-3.28198	0.0112096	0.107257	-2.53619
Lamtor2_ENSMUST00000029698	0.287288	6.03296	3.28102	0.0112256	0.107308	-2.93941
Atp5k_ENSMUST00000049628	0.286147	6.22428	3.27539	0.0113202	0.10811	-2.97875
Ccdc90b_ENSMUST00000032842	0.308826	4.73971	3.2743	0.0113387	0.108112	-2.71391
Ppp2r2d_ENSMUST00000041097	-0.251441	6.95564	-3.27411	0.0113418	0.108112	-3.07267
Dnah10_ENSMUST00000058440	-0.714071	2.70193	-3.26888	0.0114307	0.108828	-2.49527
Nisch_ENSMUST00000172142	-0.174025	7.58729	-3.26842	0.0114385	0.108828	-3.13738
Grb2_ENSMUST00000021090	0.211338	6.67846	3.2674	0.011456	0.108891	-3.05407
Mrps35_ENSMUST00000036111	0.200286	6.62364	3.26373	0.0115189	0.109368	-3.05261
Med28_ENSMUST00000156481	0.276637	5.43982	3.26297	0.0115319	0.109368	-2.85904
Lrp2_ENSMUST00000080953	-0.310281	8.46087	-3.26258	0.0115387	0.109368	-3.182
Dld_ENSMUST00000110857	-0.209646	8.12171	-3.25943	0.0115931	0.109781	-3.17715
Ttc4_ENSMUST00000026480	0.239944	5.83371	3.25814	0.0116153	0.109849	-2.93933
Fstl1_ENSMUST00000114763	0.19838	7.19462	3.25736	0.0116289	0.109849	-3.12635
Sec62_ENSMUST00000029256	0.178364	7.35977	3.25713	0.011633	0.109849	-3.14097
Acadvl_ENSMUST00000102574	-0.416771	4.97581	-3.25611	0.0116506	0.109912	-2.77494
Tchp_ENSMUST00000094441	-0.519019	2.93982	-3.25443	0.0116798	0.110085	-2.51886
Rps6ka1_ENSMUST00000105894	-0.208007	7.03819	-3.25371	0.0116925	0.110102	-3.11329
Baz2a_ENSMUST00000220049	-0.24025	8.48429	-3.24833	0.0117868	0.110602	-3.20483
Khsrp_ENSMUST00000007814	0.178511	9.10659	3.24828	0.0117878	0.110602	-3.21633
Snrnp200_ENSMUST00000103220	-0.206766	10.5156	-3.24724	0.011806	0.110602	-3.22265
Ap2a2_ENSMUST00000003038	-0.229223	7.70237	-3.24714	0.0118078	0.110602	-3.17656
Tnks1bp1_ENSMUST00000111605	-0.268706	6.21202	-3.24698	0.0118107	0.110602	-3.01377
Pdha1_ENSMUST00000033662	-0.197497	8.30699	-3.24679	0.0118139	0.110602	-3.20263
Ube2g1_ENSMUST00000021148	0.217197	6.0662	3.24631	0.0118224	0.110602	-2.99743
Fam193a_ENSMUST00000180376	-0.319177	6.2038	-3.24336	0.0118747	0.110988	-3.01693
Commd2_ENSMUST00000160959	0.335517	5.76164	3.24116	0.0119139	0.111178	-2.95204
Polr3e_ENSMUST00000033173	-0.227468	5.88223	-3.24098	0.0119171	0.111178	-2.96869
Vps35l_ENSMUST00000149749	-0.550462	3.83435	-3.2324	0.0120709	0.112509	-2.62507
Nt5dc2_ENSMUST00000227096	-0.37245	6.50771	-3.23178	0.0120822	0.11251	-3.07923
Arid2_ENSMUST00000096250	-0.483477	6.534	-3.22873	0.0121374	0.112897	-3.08472
Eif4e_ENSMUST00000029803	0.210542	7.58598	3.22825	0.0121461	0.112897	-3.20173
Rars2_ENSMUST00000029968	-0.20018	6.68907	-3.22728	0.0121638	0.112958	-3.11327
Qtrt1_ENSMUST00000002902	-0.362655	5.38278	-3.22633	0.012181	0.112992	-2.89575
Smpd2_ENSMUST00000019965	-0.393977	4.57108	-3.22584	0.01219	0.112992	-2.74896
Prkd1_ENSMUST00000002765	-0.663107	2.16894	-3.22426	0.0122189	0.113156	-2.56189
Slc2a8_ENSMUST00000028129	-0.423459	4.27139	-3.22186	0.0122628	0.113459	-2.70492
Higd1a_ENSMUST00000060251	0.241357	5.9744	3.22113	0.0122762	0.113479	-3.02024
Mast4_ENSMUST00000167058	-0.797188	2.97363	-3.21992	0.0122985	0.113581	-2.56437
Pcnx4_ENSMUST00000044352	-0.725625	2.94488	-3.21885	0.0123182	0.113659	-2.56486
Clcn2_ENSMUST00000007207	-0.614161	4.89461	-3.2163	0.0123653	0.113989	-2.81434
Pym1_ENSMUST00000163377	0.264857	6.0543	3.21566	0.0123772	0.113995	-3.04216
Rad52_ENSMUST00000032269	-0.519274	3.25012	-3.21421	0.0124042	0.11412	-2.58913
Hnrnpdl_ENSMUST00000128187	0.208443	8.87408	3.21361	0.0124153	0.11412	-3.26671
Sox2_ENSMUST00000099151	0.232785	8.35393	3.21226	0.0124404	0.11412	-3.25828
Polg_ENSMUST00000073889	-0.284579	6.26147	-3.21218	0.0124418	0.11412	-3.07417
Kmt5a_ENSMUST00000059580	0.293945	5.93869	3.21189	0.0124474	0.11412	-3.02814
Mfsd14a_ENSMUST00000029570	-0.312125	6.01296	-3.21098	0.0124642	0.114138	-3.03517
Rcc1l_ENSMUST00000076228	-0.480323	4.13305	-3.21057	0.0124719	0.114138	-2.69888
Ap1g2_ENSMUST00000036041	-0.39903	4.07933	-3.20996	0.0124833	0.114138	-2.69303
Sp1_ENSMUST00000001326	0.174749	8.47704	3.20928	0.0124961	0.114151	-3.26583
Thbs1_ENSMUST00000039559	-0.255138	5.78584	-3.20853	0.0125101	0.114176	-3.0001
Ubald2_ENSMUST00000057676	0.184326	6.88888	3.20694	0.0125399	0.114345	-3.17186
Cox10_ENSMUST00000049091	-0.321483	4.61149	-3.20603	0.0125572	0.114399	-2.7865
Ppp4r3b_ENSMUST00000020755	-0.217649	6.49397	-3.20441	0.0125876	0.114485	-3.12158
Cct6b_ENSMUST00000021040	0.455215	3.86191	3.20414	0.0125927	0.114485	-2.67658
Mrps5_ENSMUST00000028852	-0.261578	7.42912	-3.20372	0.0126007	0.114485	-3.22468
Ap1m2_ENSMUST00000003397	-0.386424	5.38317	-3.20076	0.0126568	0.114891	-2.93399
Ube2a_ENSMUST00000016452	0.26856	6.74486	3.19931	0.0126842	0.115036	-3.16665
Kat6b_ENSMUST00000182405	-0.379526	7.89552	-3.19851	0.0126995	0.115071	-3.26007
Tagln2_ENSMUST00000111230	0.226301	8.02827	3.19552	0.0127566	0.115432	-3.27392
Bnip3l_ENSMUST00000022634	0.211643	6.49116	3.19523	0.0127622	0.115432	-3.13964
Supt5_ENSMUST00000003527	0.181715	8.28115	3.19391	0.0127874	0.115556	-3.28455
Dnajc8_ENSMUST00000094657	0.190314	7.85481	3.19248	0.0128149	0.115701	-3.27133
Angel2_ENSMUST00000066632	-0.354462	4.77286	-3.19128	0.012838	0.115806	-2.83606
Sf3b4_ENSMUST00000076372	0.23568	8.33819	3.18996	0.0128635	0.115828	-3.29228
Ralgapa2_ENSMUST00000109986	-0.376123	4.62679	-3.18944	0.0128736	0.115828	-2.8126
Mphosph10_ENSMUST00000032735	0.193184	8.07885	3.18893	0.0128834	0.115828	-3.28585
Mrps26_ENSMUST00000145614	0.315296	5.01363	3.18878	0.0128864	0.115828	-2.88961
Mad2l1_ENSMUST00000116605	0.195547	7.11921	3.1863	0.0129344	0.11607	-3.22824
Slc31a1_ENSMUST00000084526	0.242945	6.07271	3.18464	0.0129667	0.11607	-3.09248
Ywhaz_ENSMUST00000022894	0.190431	9.41643	3.18462	0.012967	0.11607	-3.31742
Farp2_ENSMUST00000120301	-0.676824	2.49464	-3.18457	0.0129679	0.11607	-2.60205
Nrbf2_ENSMUST00000077839	0.397338	4.71489	3.18429	0.0129734	0.11607	-2.84202
Cnbp_ENSMUST00000032138	0.209331	8.80271	3.18383	0.0129823	0.11607	-3.31156
Ubr5_ENSMUST00000226414	-0.442613	10.0986	-3.17795	0.0130976	0.116997	-3.32973
Helz_ENSMUST00000075012	-0.308721	6.81277	-3.17246	0.013206	0.117861	-3.21129
Dbt_ENSMUST00000000349	-0.297357	5.88633	-3.16927	0.0132695	0.118287	-3.07683
Psme3_ENSMUST00000019470	0.223976	7.56246	3.16888	0.0132773	0.118287	-3.29172
Kif1b_ENSMUST00000055647	-0.249325	6.6582	-3.16805	0.0132938	0.11833	-3.19922
Manba_ENSMUST00000029814	-0.22604	7.07906	-3.16741	0.0133067	0.118341	-3.24982
Cop1_ENSMUST00000076894	-0.487187	4.46628	-3.16373	0.0133806	0.118734	-2.82058
Smg7_ENSMUST00000073441	-0.244418	7.2501	-3.16373	0.0133806	0.118734	-3.27171
Xkr5_ENSMUST00000095438	-0.359535	4.96846	-3.16311	0.0133931	0.118734	-2.91295
Snrpd2_ENSMUST00000049294	0.310347	7.86866	3.16286	0.0133981	0.118734	-3.31793
Hnrnpa3_ENSMUST00000111961	0.30574	6.03485	3.15858	0.0134846	0.11936	-3.12591
Fkbp3_ENSMUST00000021332	0.265585	8.61455	3.15734	0.0135097	0.11936	-3.34908
Emc6_ENSMUST00000054952	0.341836	4.56073	3.15698	0.013517	0.11936	-2.85544
Nek1_ENSMUST00000034065	-0.532771	4.43446	-3.15669	0.0135229	0.11936	-2.82365
Bex3_ENSMUST00000178632	0.20796	7.28231	3.15617	0.0135336	0.11936	-3.28993
Cby1_ENSMUST00000023064	0.426147	3.52652	3.15587	0.0135397	0.11936	-2.70078
Dym_ENSMUST00000039608	-0.360234	5.59537	-3.15489	0.0135597	0.119432	-3.04357
Uqcrh_ENSMUST00000078676	0.232244	6.30058	3.15355	0.0135869	0.119567	-3.17605
Hnrnpr_ENSMUST00000148843	0.197031	7.66514	3.15274	0.0136036	0.119609	-3.32281
Ywhag_ENSMUST00000055808	0.196646	8.78923	3.14898	0.0136808	0.120184	-3.3652
Ddx11_ENSMUST00000163605	-0.29292	5.89193	-3.14456	0.0137721	0.120881	-3.1152
Acad10_ENSMUST00000111770	-0.438521	4.00657	-3.13988	0.0138696	0.121599	-2.78183
Prmt1_ENSMUST00000107843	-0.249328	8.84173	-3.13828	0.0139031	0.121599	-3.38185
Smc4_ENSMUST00000042901	-0.310595	8.85433	-3.13764	0.0139164	0.121599	-3.38287
Tmem258_ENSMUST00000040372	0.237044	6.17267	3.13749	0.0139196	0.121599	-3.18077
Peak1_ENSMUST00000061552	-0.376692	5.64205	-3.13734	0.0139228	0.121599	-3.07847
Mbd6_ENSMUST00000026476	-0.563271	2.87639	-3.13717	0.0139263	0.121599	-2.66972
Snrpb2_ENSMUST00000008477	0.259018	7.76716	3.13547	0.0139621	0.121806	-3.35528
Rps2_ENSMUST00000170715	0.285736	7.02327	3.13341	0.0140054	0.121942	-3.29998
Ptpn2_ENSMUST00000025420	-0.202311	6.6183	-3.13308	0.0140125	0.121942	-3.24832
Dlgap5_ENSMUST00000043296	0.203642	8.74236	3.13269	0.0140208	0.121942	-3.38962
Srrm1_ENSMUST00000136342	0.167107	9.51978	3.13243	0.0140261	0.121942	-3.39885
Cdr2_ENSMUST00000033169	-0.389455	4.11927	-3.13153	0.0140453	0.122004	-2.81217
Lrfn4_ENSMUST00000113822	-0.64699	3.03552	-3.13029	0.0140714	0.12211	-2.68626
Stmn2_ENSMUST00000029002	0.195459	8.64867	3.12981	0.0140816	0.12211	-3.39231
S100a10_ENSMUST00000045756	0.239945	6.21806	3.12858	0.0141079	0.12216	-3.20168
Cntrl_ENSMUST00000113032	-0.486092	5.39086	-3.1284	0.0141117	0.12216	-3.04159
Hibch_ENSMUST00000044478	-0.374799	5.35874	-3.12771	0.0141264	0.122182	-3.03894
Tom1l1_ENSMUST00000020849	0.297629	5.17967	3.126	0.0141628	0.122187	-3.01492
Clasp2_ENSMUST00000166734	-0.23711	6.78943	-3.12571	0.014169	0.122187	-3.28136
Nucks1_ENSMUST00000062264	0.193455	8.41465	3.12553	0.014173	0.122187	-3.39379
Haus1_ENSMUST00000048192	0.260323	6.61249	3.12467	0.0141913	0.122187	-3.26438
Snw1_ENSMUST00000021428	0.206043	8.03291	3.12412	0.014203	0.122187	-3.38437
Senp5_ENSMUST00000231360	-0.408613	3.90147	-3.12383	0.0142093	0.122187	-2.78987
Cand2_ENSMUST00000075995	-0.264852	5.73709	-3.12343	0.0142179	0.122187	-3.11979
Nanog_ENSMUST00000012540	0.210454	9.41243	3.12315	0.0142238	0.122187	-3.41252
Plxna3_ENSMUST00000004326	-0.458413	3.90243	-3.12171	0.0142548	0.122293	-2.79218
Lrp5_ENSMUST00000025856	-0.494981	5.48195	-3.11977	0.0142965	0.122293	-3.07159
Cox7a2_ENSMUST00000034881	0.231441	7.21951	3.11955	0.0143014	0.122293	-3.34088
Eefsec_ENSMUST00000165242	-0.253216	5.96535	-3.11932	0.0143062	0.122293	-3.16754
Hdac1_ENSMUST00000102597	-0.203196	9.11	-3.11923	0.0143083	0.122293	-3.41523
Ubxn1_ENSMUST00000166407	0.204464	7.51401	3.11919	0.014309	0.122293	-3.36508
Naa15_ENSMUST00000029303	-0.191574	8.97977	-3.11795	0.0143359	0.122382	-3.41556
Snapc4_ENSMUST00000035427	-0.421634	4.94261	-3.11759	0.0143436	0.122382	-2.97484
Chordc1_ENSMUST00000001825	0.185389	7.09794	3.117	0.0143565	0.122388	-3.33284
Kif18b_ENSMUST00000021311	-0.335475	6.53314	-3.11622	0.0143732	0.122427	-3.26032
Znrd2_ENSMUST00000025885	0.223803	6.49406	3.11499	0.0144	0.122552	-3.26312
Vps72_ENSMUST00000009102	0.272868	5.88233	3.11402	0.014421	0.122627	-3.16709
Grpel1_ENSMUST00000031099	0.197797	7.08924	3.11282	0.0144474	0.122634	-3.33845
Uggt1_ENSMUST00000046875	-0.176534	8.44078	-3.11242	0.014456	0.122634	-3.41389
Uqcrb_ENSMUST00000021993	0.220213	7.50811	3.11223	0.0144602	0.122634	-3.37549
Odc1_ENSMUST00000171737	-0.156472	9.3327	-3.11133	0.0144797	0.122634	-3.42981
Zfp568_ENSMUST00000148442	-0.208794	7.4263	-3.1112	0.0144826	0.122634	-3.36791
Ly6e_ENSMUST00000169343	0.271087	6.89961	3.10958	0.0145182	0.122773	-3.32306
Wdr7_ENSMUST00000072726	-0.38385	4.92479	-3.10934	0.0145234	0.122773	-2.98443
Krt8_ENSMUST00000023952	-0.516401	4.95408	-3.10723	0.0145696	0.122971	-2.98989
Ranbp3_ENSMUST00000002445	0.208168	7.1203	3.10716	0.0145712	0.122971	-3.35034
Psmd6_ENSMUST00000022256	0.205543	8.27254	3.10483	0.0146226	0.123302	-3.42208
Grk2_ENSMUST00000088737	-0.331914	5.51791	-3.10264	0.0146711	0.123607	-3.10881
Repin1_ENSMUST00000163452	-0.679203	3.12681	-3.10065	0.0147153	0.123876	-2.73215
Pold2_ENSMUST00000102922	-0.237809	7.199	-3.09697	0.0147972	0.124462	-3.37009
BC031181_ENSMUST00000040284	0.425152	4.82999	3.09532	0.0148343	0.12467	-2.99465
Mtmr10_ENSMUST00000032736	-0.523945	3.24776	-3.09364	0.014872	0.124851	-2.75231
Cep290_ENSMUST00000220346	-0.486891	4.71022	-3.09216	0.0149052	0.124851	-2.96886
Eif2s2_ENSMUST00000099173	0.194965	9.69049	3.09172	0.0149153	0.124851	-3.46288
Rab5c_ENSMUST00000107364	-0.324335	6.13223	-3.0917	0.0149156	0.124851	-3.23648
Pacs1_ENSMUST00000025786	-0.353496	4.87088	-3.09161	0.0149177	0.124851	-3.00167
Zfp407_ENSMUST00000125763	-0.266272	5.15668	-3.08797	0.0149999	0.125435	-3.06259
Akr1a1_ENSMUST00000030455	0.202827	7.13676	3.08628	0.0150385	0.125508	-3.38423
Zfp719_ENSMUST00000058104	-0.384656	4.5089	-3.08596	0.0150457	0.125508	-2.94382
Anxa11_ENSMUST00000022416	0.194096	7.89055	3.08595	0.015046	0.125508	-3.43764
Ndufb2_ENSMUST00000135671	0.252416	5.4035	3.08383	0.0150941	0.125805	-3.12191
Scamp2_ENSMUST00000045791	0.24926	5.68751	3.08242	0.0151263	0.125901	-3.17895
Nrde2_ENSMUST00000021596	-0.312854	6.12944	-3.08224	0.0151306	0.125901	-3.25114
Rbm44_ENSMUST00000094698	-0.47722	4.54784	-3.08109	0.0151569	0.126016	-2.95588
Abt1_ENSMUST00000041782	0.273933	5.73135	3.0797	0.0151889	0.126178	-3.19143
Taf15_ENSMUST00000021018	0.194786	7.66655	3.0781	0.0152256	0.126379	-3.43834
Topbp1_ENSMUST00000035164	-0.220996	7.43341	-3.07692	0.0152529	0.126501	-3.4213
Ctnna1_ENSMUST00000042345	0.196652	10.0481	3.07625	0.0152683	0.126525	-3.48788
E2f8_ENSMUST00000119223	-0.642671	5.0966	-3.07392	0.0153223	0.126802	-3.06467
Trmu_ENSMUST00000023019	-0.603615	2.74004	-3.0734	0.0153342	0.126802	-2.74775
Fhl3_ENSMUST00000038684	0.368247	4.47906	3.07318	0.0153395	0.126802	-2.9646
Tmem109_ENSMUST00000038128	0.361461	5.03658	3.0713	0.0153831	0.127058	-3.06952
Kxd1_ENSMUST00000121623	0.492385	3.58336	3.07001	0.0154131	0.127203	-2.8278
Sec13_ENSMUST00000032440	0.186759	7.12747	3.06731	0.0154763	0.12762	-3.41255
Nup93_ENSMUST00000212824	-0.200554	8.58537	-3.06506	0.0155293	0.127952	-3.49062
Mterf4_ENSMUST00000027492	0.279914	5.10157	3.0642	0.0155494	0.128013	-3.09271
Ovca2_ENSMUST00000071562	0.782873	1.65789	3.06294	0.0155791	0.128107	-2.77887
Gtf2a2_ENSMUST00000118198	0.327485	5.21545	3.06264	0.0155862	0.128107	-3.11717
Lrp1_ENSMUST00000049149	-0.60931	6.71415	-3.06177	0.0156067	0.12817	-3.36309
Rere_ENSMUST00000105682	-0.212855	6.80138	-3.06082	0.0156291	0.12825	-3.38315
Cstf2t_ENSMUST00000066039	0.248671	6.84281	3.05786	0.0156994	0.128722	-3.39613
Ipo8_ENSMUST00000048418	-0.339973	6.58554	-3.05676	0.0157258	0.128741	-3.35908
Uchl1_ENSMUST00000031131	0.169982	7.63996	3.05643	0.0157336	0.128741	-3.47028
Pdap1_ENSMUST00000031627	0.176382	7.41446	3.0556	0.0157533	0.128741	-3.45607
Mdh1_ENSMUST00000102874	0.188201	8.1709	3.05544	0.0157571	0.128741	-3.49553
Hnrnph2_ENSMUST00000074950	0.240449	7.55801	3.05509	0.0157655	0.128741	-3.46743
Sf3a2_ENSMUST00000148665	0.214343	7.96939	3.05403	0.015791	0.128845	-3.49051
Cenpa_ENSMUST00000144742	0.230971	5.91154	3.05208	0.0158377	0.129122	-3.26682
Slc27a4_ENSMUST00000080065	-0.253047	5.33449	-3.05031	0.0158801	0.129362	-3.15403
Sik1_ENSMUST00000024839	-0.368686	7.09674	-3.04955	0.0158984	0.129407	-3.4312
Sugp1_ENSMUST00000011450	0.251018	6.71356	3.04728	0.0159534	0.129651	-3.39658
Raf1_ENSMUST00000000451	-0.285209	5.98765	-3.04725	0.015954	0.129651	-3.28118
Suco_ENSMUST00000048377	-0.300279	5.75528	-3.0439	0.0160353	0.130088	-3.24361
Atp9b_ENSMUST00000225980	-0.333935	5.34439	-3.04361	0.0160424	0.130088	-3.16453
Sugp2_ENSMUST00000093458	-0.370367	4.4232	-3.04344	0.0160466	0.130088	-2.99117
Cd164_ENSMUST00000019962	0.249598	7.75882	3.04153	0.0160931	0.130344	-3.50027
Eif5b_ENSMUST00000027252	0.15338	9.07839	3.04108	0.0161039	0.130344	-3.53661
Ttc27_ENSMUST00000024882	-0.343265	7.19603	-3.04051	0.016118	0.130353	-3.4556
Ampd2_ENSMUST00000102637	-0.267264	5.89343	-3.03882	0.0161594	0.130504	-3.27728
Wdr1_ENSMUST00000005234	-0.180554	8.01976	-3.03869	0.0161626	0.130504	-3.51457
Chek1_ENSMUST00000034625	-0.190524	7.30978	-3.03728	0.0161971	0.130646	-3.47294
Sumf1_ENSMUST00000032191	0.416997	3.8775	3.03692	0.0162061	0.130646	-2.9176
Senp6_ENSMUST00000037484	-0.359184	6.24657	-3.03422	0.0162725	0.131023	-3.3429
Atad5_ENSMUST00000017694	-0.426638	7.13687	-3.03317	0.0162985	0.131023	-3.45978
Plcg2_ENSMUST00000081232	-0.626739	6.152	-3.03286	0.0163063	0.131023	-3.32076
Arhgef11_ENSMUST00000039476	-0.317162	4.5223	-3.03282	0.0163072	0.131023	-3.02594
Steap1_ENSMUST00000015796	0.25972	5.33503	3.03239	0.0163178	0.131023	-3.18634
Rbbp6_ENSMUST00000052135	-0.306488	7.78387	-3.03082	0.0163567	0.131229	-3.51447
Fbxo42_ENSMUST00000030757	-0.324613	5.48709	-3.03031	0.0163695	0.131229	-3.21275
Mrpl12_ENSMUST00000043627	0.217246	6.79329	3.02976	0.0163831	0.131234	-3.43352
Vim_ENSMUST00000028062	-0.209586	8.06064	-3.0289	0.0164045	0.131301	-3.53116
Telo2_ENSMUST00000115181	-0.434272	3.82293	-3.027	0.016452	0.131476	-2.91571
Orc3_ENSMUST00000048706	-0.164312	7.42115	-3.02698	0.0164524	0.131476	-3.49837
Dgkh_ENSMUST00000074729	-0.258228	5.35297	-3.02579	0.016482	0.131608	-3.19469
Ywhah_ENSMUST00000019109	0.201025	8.33788	3.02195	0.0165786	0.132275	-3.55246
Arhgef10l_ENSMUST00000105799	-0.490457	3.68845	-3.02022	0.0166223	0.132518	-2.9053
Fam13b_ENSMUST00000040506	-0.935508	2.36279	-3.01955	0.016639	0.132547	-2.80962
Zfp68_ENSMUST00000110905	-0.729938	2.94696	-3.018	0.0166782	0.132754	-2.83035
Ncoa5_ENSMUST00000040381	0.209247	6.47165	3.01724	0.0166976	0.132755	-3.41035
Seh1l_ENSMUST00000025421	-0.294797	7.4849	-3.0167	0.0167114	0.132755	-3.51749
Ndufa6_ENSMUST00000023085	0.18295	6.93653	3.01644	0.0167178	0.132755	-3.47094
Zc3h15_ENSMUST00000081591	0.160665	7.84937	3.01576	0.0167351	0.13276	-3.54453
Ptcd1_ENSMUST00000031628	-0.312367	5.16045	-3.01538	0.0167448	0.13276	-3.17177
Eif2s3x_ENSMUST00000050328	-0.244281	8.48447	-3.0132	0.0168005	0.133006	-3.56869
Hccs_ENSMUST00000112115	0.275416	5.18741	3.01313	0.0168022	0.133006	-3.18636
Tln1_ENSMUST00000030187	0.166017	8.93285	3.01241	0.0168207	0.133048	-3.57928
Trip4_ENSMUST00000119245	0.242838	5.67362	3.00722	0.0169539	0.133997	-3.2909
Pik3ca_ENSMUST00000108243	-0.379121	4.36292	-3.00358	0.0170479	0.134563	-3.0393
Iqsec1_ENSMUST00000101153	-0.588845	3.61656	-3.00203	0.0170881	0.134563	-2.91955
Grk6_ENSMUST00000099482	-0.247644	5.47906	-3.00193	0.0170908	0.134563	-3.25581
Mars2_ENSMUST00000061334	-0.35225	5.44916	-3.0019	0.0170915	0.134563	-3.24735
Lpin3_ENSMUST00000109456	-0.526972	3.50575	-3.00188	0.0170922	0.134563	-2.90594
Gnb2_ENSMUST00000031726	-0.209178	6.95036	-3.00007	0.0171392	0.134818	-3.4945
Pnpla6_ENSMUST00000004681	-0.400466	6.43225	-2.99922	0.0171615	0.134818	-3.42457
Tomm70a_ENSMUST00000166897	0.179115	8.67813	2.99909	0.0171647	0.134818	-3.59573
Atg4d_ENSMUST00000065005	-0.55996	2.93218	-2.99781	0.0171983	0.134903	-2.85734
Spcs2_ENSMUST00000036274	0.233555	7.2766	2.99765	0.0172024	0.134903	-3.5346
Atp5md_ENSMUST00000096014	0.202561	6.15591	2.99695	0.0172208	0.134917	-3.39345
Acadm_ENSMUST00000072697	-0.361918	7.29241	-2.99656	0.0172309	0.134917	-3.53211
Syce2_ENSMUST00000136026	0.314573	5.23767	2.99601	0.0172453	0.134925	-3.22215
H2ax_ENSMUST00000052686	0.227389	8.19176	2.99405	0.0172969	0.135224	-3.5916
Frmd5_ENSMUST00000138157	-0.58332	2.87722	-2.99083	0.017382	0.135567	-2.86298
Txnl1_ENSMUST00000025476	0.18139	8.12864	2.99064	0.0173868	0.135567	-3.59476
Eif3f_ENSMUST00000033342	0.154545	8.71672	2.9897	0.0174117	0.135567	-3.61105
Sinhcaf_ENSMUST00000054080	0.243603	8.47999	2.98944	0.0174186	0.135567	-3.60658
Csnk2b_ENSMUST00000173114	0.210412	7.41676	2.98918	0.0174255	0.135567	-3.55932
Kdm2b_ENSMUST00000046073	-0.246959	6.83575	-2.98894	0.0174319	0.135567	-3.49784
Mrps28_ENSMUST00000042148	0.207222	6.29061	2.98883	0.0174348	0.135567	-3.42735
Ap2m1_ENSMUST00000007216	-0.438374	7.36005	-2.98687	0.0174869	0.135778	-3.5517
Crip2_ENSMUST00000084882	0.255723	5.787	2.98632	0.0175016	0.135778	-3.34447
Necap1_ENSMUST00000032477	0.224672	5.99679	2.9862	0.0175047	0.135778	-3.38295
Wbp4_ENSMUST00000022601	0.211926	5.80249	2.98579	0.0175158	0.135778	-3.34807
Sgo1_ENSMUST00000024736	-0.271812	6.17396	-2.98431	0.0175552	0.135973	-3.40938
Klf10_ENSMUST00000227920	0.20164	7.44762	2.98371	0.0175714	0.135973	-3.57017
Emb_ENSMUST00000022242	0.261091	8.37131	2.98333	0.0175814	0.135973	-3.61342
Gstcd_ENSMUST00000029651	-0.392829	4.15306	-2.98188	0.0176203	0.136169	-3.03422
Romo1_ENSMUST00000088610	0.317689	5.14599	2.98041	0.0176599	0.136321	-3.2276
Nudcd3_ENSMUST00000066496	0.19545	6.62975	2.98006	0.0176692	0.136321	-3.48936
Xpnpep3_ENSMUST00000163754	-0.38326	5.10723	-2.9787	0.0177059	0.136321	-3.21587
Raly_ENSMUST00000109701	0.162071	8.03737	2.97833	0.0177158	0.136321	-3.61059
Zfp622_ENSMUST00000061875	0.192693	7.85223	2.97817	0.0177202	0.136321	-3.60314
Lasp1_ENSMUST00000043843	0.210967	7.59444	2.97814	0.0177211	0.136321	-3.58907
Smg8_ENSMUST00000020801	-0.245057	6.35485	-2.97723	0.0177456	0.136358	-3.44985
Sec22b_ENSMUST00000029476	0.28877	5.66892	2.97696	0.017753	0.136358	-3.33622
Urah_ENSMUST00000211372	0.318198	4.19528	2.9752	0.0178005	0.136619	-3.0593
Incenp_ENSMUST00000025562	-0.16239	7.98809	-2.97363	0.0178431	0.136842	-3.61444
Pdia6_ENSMUST00000057288	0.163809	9.05934	2.97166	0.0178969	0.13703	-3.64436
Rbm39_ENSMUST00000109587	0.177334	9.20643	2.97096	0.017916	0.13703	-3.6471
Taf7_ENSMUST00000066272	0.224566	8.08525	2.97019	0.017937	0.13703	-3.62513
Cnot9_ENSMUST00000087215	0.233536	6.71884	2.97009	0.0179396	0.13703	-3.51646
Zfp958_ENSMUST00000202692	-0.347409	4.28856	-2.96975	0.0179489	0.13703	-3.07624
Ppdpf_ENSMUST00000016488	0.316103	5.36534	2.96932	0.0179609	0.13703	-3.28797
Jmjd1c_ENSMUST00000051446	-0.254021	8.92593	-2.96912	0.0179662	0.13703	-3.64578
Igf2bp1_ENSMUST00000013559	0.171611	9.80148	2.96876	0.0179763	0.13703	-3.65443
Tomm7_ENSMUST00000030851	0.266942	6.65381	2.96498	0.0180799	0.137716	-3.5161
Zfp871_ENSMUST00000159086	-0.343461	5.72114	-2.96158	0.018174	0.138106	-3.36136
Snx8_ENSMUST00000196566	-0.363384	4.50033	-2.96143	0.0181783	0.138106	-3.12667
Arc_ENSMUST00000110009	0.281239	4.87191	2.96124	0.0181835	0.138106	-3.20302
Zfp763_ENSMUST00000087654	-0.467447	3.56228	-2.96084	0.0181946	0.138106	-2.97252
Gltp_ENSMUST00000012028	0.418848	4.05121	2.96065	0.0181996	0.138106	-3.0558
Morc2a_ENSMUST00000093389	-0.182255	6.88172	-2.95979	0.0182236	0.138185	-3.5494
Anp32e_ENSMUST00000165307	0.186203	8.14448	2.95869	0.0182542	0.138308	-3.645
Plcd3_ENSMUST00000103077	-0.782258	3.11733	-2.95777	0.01828	0.138308	-2.92318
Ube2l3_ENSMUST00000232139	0.273979	7.88574	2.95773	0.018281	0.138308	-3.63667
Tcl1_ENSMUST00000041316	0.276334	5.94871	2.95702	0.0183007	0.138353	-3.41924
Sprtn_ENSMUST00000034467	-0.433739	4.69609	-2.95608	0.0183272	0.138449	-3.16931
Glb1_ENSMUST00000063042	-0.220806	6.8307	-2.95379	0.0183913	0.13883	-3.55193
[truncated: 8,749 more rows]

## Sheet: Rps27l_IP_vs_total
gene_name_ensembl_ID	log2_fold_change	average_expression_log2_cpm	t	p-value	adjusted_p-value	B
[truncated: 10,085 more rows]

[truncated: 5 more sheets: total_RPF_Rps27_vs_WT, total_RPF_Rps27l_vs_WT, total_RPF_Rps27l_vs_Rps27, Rps27_Rps27l_diff_enrichment, Rps27l_enriched_GO_terms]
