# Supplementary material for: Subfunctionalized expression drives evolutionary retention of ribosomal protein paralogs Rps27 and Rps27l in vertebrates
Source: eLife. 2023 Jun 12;12:e78695. doi: 10.7554/eLife.78695 (PMC10313321; doi:10.7554/eLife.78695)
Supplement: Supplementary file 4. — WNL, within normal limits. [file elife-78695-supp4.xlsx]

## Sheet: Weights
Accession #	ID	Lineage	Zygosity	Body weight (g)	Liver (g)	Liver (% BW)	Spleen (g)	Spleen (% BW)	Heart (g)	Heart (% BW)	Kidney L (g)	Kidney L (% BW)	Kidney R (g)	Kidney R (% BW)	Testes L (g)	Testis L (% BW)	Testes R (g)	Testis R (% BW)
L21-0365	T223	Rps27^Rps27l	hom	24.6	1.27	5.1626	0.07	0.284553	0.13	0.528455	0.15	0.609756	0.16	0.650407	0.1	0.406504	0.09	0.365854
L21-0366	T255	Rps27^Rps27l	hom	24.1	1.27	5.26971	0.07	0.290456	0.17	0.705394	0.14	0.580913	0.15	0.622407	0.09	0.373444	0.09	0.373444
L21-0367	T146	Rps27^Rps27l	hom	29.4	1.53	5.20408	0.07	0.238095	0.15	0.510204	0.19	0.646259	0.19	0.646259	0.11	0.37415	0.11	0.37415
L21-0368	T268	Rps27l^Rps27	hom	22.4	1.11	4.95536	0.06	0.267857	0.14	0.625	0.14	0.625	0.14	0.625	0.09	0.401786	0.09	0.401786
L21-0370	T237	Rps27l^Rps27	hom	24.6	1.22	4.95935	0.06	0.243902	0.12	0.487805	0.16	0.650407	0.16	0.650407	0.1	0.406504	0.1	0.406504
L21-0371	T102	Rps27l^Rps27	hom	26.8	1.23	4.58955	0.07	0.261194	0.16	0.597015	0.18	0.671642	0.17	0.634328	0.03	0.11194	0.11	0.410448
L21-0369	T232	WT	WT	28.9	1.57	5.43253	0.08	0.276817	0.15	0.519031	0.17	0.588235	0.2	0.692042	0.11	0.380623	0.11	0.380623
L21-0372	T106	WT	WT	28.4	1.22	4.29577	0.07	0.246479	0.14	0.492958	0.2	0.704225	0.2	0.704225	0.08	0.28169	0.08	0.28169
L21-0373	T274	WT	WT	23	1.17	5.08696	0.05	0.217391	0.13	0.565217	0.18	0.782609	0.16	0.695652	0.02	0.0869565	0.02	0.0869565

## Sheet: Histology
Accession #	ID	Lineage	Zygosity	Liver	Kidney	Heart	Spleen	Thymus	Pancreas	Salivary Glands	Lungs	Thyroid	Trachea	Esophagus	Tongue	Haired skin (interscapular)	Testes	Accessory Sex Glands (preputial, seminal vesicles, prostate)	Urinary Bladder	Brain	GI	Bone Marrow (pelvic limb)	Nasal Cavity	Eyes	Teeth	Ears	Vertebral Column	Spinal Cord
L21-0365	T223	Rps27^Rps27l	hom	focal microgranuloma	WNL	WNL	WNL	WNL	WNL	WNL	WNL	WNL	WNL	WNL	WNL	WNL	WNL	WNL	WNL	WNL	WNL	WNL	WNL	WNL	WNL	WNL	WNL	WNL
L21-0366	T255	Rps27^Rps27l	hom	WNL	focal tubular degeneration	WNL	WNL	WNL	WNL	WNL	WNL	WNL	WNL	WNL	WNL	WNL	WNL	WNL	WNL	WNL	WNL	WNL	WNL	WNL	WNL	WNL	WNL	WNL
L21-0367	T146	Rps27^Rps27l	hom	mild MF microgranuloma	WNL	WNL	WNL	WNL	WNL	WNL	WNL	WNL	WNL	WNL	WNL	WNL	WNL	WNL	WNL	WNL	WNL	WNL	WNL	WNL	WNL	WNL	WNL	WNL
L21-0368	T268	Rps27l^Rps27	hom	mild MF microgranuloma	WNL	WNL	WNL	WNL	WNL	WNL	WNL	WNL	WNL	WNL	WNL	WNL	WNL	WNL	WNL	WNL	WNL	WNL	WNL	WNL	WNL	WNL	WNL	WNL
L21-0370	T237	Rps27l^Rps27	hom	mild MF microgranuloma	WNL	WNL	WNL	WNL	WNL	WNL	WNL	WNL	WNL	WNL	WNL	WNL	WNL	WNL	WNL	WNL	WNL	WNL	WNL	WNL	WNL	WNL	WNL	WNL
L21-0371	T102	Rps27l^Rps27	hom	WNL	WNL	WNL	WNL	WNL	WNL	WNL	WNL	WNL	NA	WNL	WNL	WNL	WNL	WNL	WNL	WNL	WNL	WNL	WNL	WNL	WNL	WNL	WNL	WNL
L21-0369	T232	WT	WT	WNL	WNL	WNL	WNL	WNL	WNL	WNL	WNL	WNL	WNL	WNL	WNL	WNL	WNL	WNL	WNL	WNL	WNL	WNL	WNL	WNL	WNL	WNL	WNL	WNL
L21-0372	T106	WT	WT	WNL	WNL	WNL	WNL	WNL	WNL	WNL	WNL	WNL	WNL	WNL	WNL	WNL	mild, MF, testicular degeneration	WNL	WNL	WNL	WNL	WNL	WNL	WNL	WNL	WNL	WNL	WNL
L21-0373	T274	WT	WT	WNL	WNL	LV - focal myocardial necrosis and kayrorhectic debris	WNL	WNL	WNL	WNL	WNL	NA	WNL	WNL	WNL	WNL	severe, diffuse, testicular degeneration	WNL	WNL	WNL	WNL	WNL	WNL	WNL	WNL	WNL	WNL	WNL
