# Supplementary material for: Subfunctionalized expression drives evolutionary retention of ribosomal protein paralogs Rps27 and Rps27l in vertebrates
Source: eLife. 2023 Jun 12;12:e78695. doi: 10.7554/eLife.78695 (PMC10313321; doi:10.7554/eLife.78695)
Supplement: Supplementary file 5. [file elife-78695-supp5.xlsx]

## Sheet: bloodwork_results
ID	Lineage	Zygosity	White Blood Cell (K/uL)	Red Blood Cell (M/uL)	Hemoglobin (gm/dL)	Hematocrit (%)	Mean Corpuscular Volume (fL)	Mean Corpuscular Hemoglobin (pg)	Mean Corpuscular Hemoglobin Concentration (g/dL)	Platelet (count)	Red Cell Distribution Width (%)	Platelet Distribution Width (fL)	Mean Platelet Volume (fL)	Platelet-Large Cell Ratio (%)	Plateletcrit (%)	Reticulocyte (%)	Immature Reticulocyte Fraction (%)	Reticulocyte (absolute)	Neutrophils (%)	Lymphocytes (%)	Monocytes (%)	Eosinophils (%)	Basophils (%)	Neutrophil (absolute)	Lymphocyte (absolute)	Monocyte (absolute)	Eosinophil (absolute)	Basophil (absolute)	Glucose (mg/dL)	Aspartate Aminotransferase (U/L)	Alanine Aminotransferase (U/L)	Alkaline Phosphatase (IU/L)	Gamma-Glutamyl Transferase (U/L)	Total Bilirubin (mg/dL)	Direct Bilirubin (mg/dL)	Indirect Bilirubin (mg/dL)	Cholesterol (mg/dL)	BUN (mg/dL)	Creatinine (mg/dL)	Calcium (mg/dL)	Phosphorus (mg/dL)	Total Protein (g/dL)	Albumin (g/dL)	Globulin (g/dL)	Sodium (mmol/L)	Potassium (mmol/L)	Chloride (mmol/L)	Carbon Dioxide (mmol/L)	Na-K (ratio)
T223	Rps27^Rps27l	hom	6.04	10.08	15.1	55.8	55.4	15	27.1	1854	19.8	8.1	6.8	6	1.27	4.54	50.8	457632	11	84	5	0	0	664	5074	302	0	0	214	222	46	104	10	<0.1			110	34	0.3	10.7	11.5	6	3.7	2.3	160	8.1	107	20.3	19.8
T255	Rps27^Rps27l	hom	8.36	10.62	15.7	57.5	54.1	14.8	27.3	1580	19.4	8.2	7.2	7	1.13	5.81	62.4	617022	8	87	3	2	0	669	7273	251	167	0	213	116	51	88	10	<0.1			139	30	0.29	10.7	10.6	5.9	3.6	2.3	155	7.4	113	20.3	20.9
T146	Rps27^Rps27l	hom	12.39	10.87	15.88	55.9	51.4	14.5	28.3	1749	20.7	8.6	7.1	6.6	1.24	5.56	56.6	604372	4	90	4	2	0	496	11151	496	248	0	201	261	71	64	7	0.1	0	0.1	129	31	0.27	11	10.5	6.2	3.9	2.3	156	8	113	22.3	19.5
T268	Rps27l^Rps27	hom	7.76	10.06	14.9	54	53.7	14.8	27.6	1754	18.8	7.7	6.8	5.8	1.18	5.25	58.1	528150	5	91	3	1	0	388	7062	233	78	0	229	134	41	112	11	<0.1	0		109	36	0.2	10.8	11	5.9	3.7	2.2	155	8	113	21.3	19.4
T237	Rps27l^Rps27	hom	5.25	10.12	14.8	53.3	52.7	14.6	27.8	1871	19.1	8.2	6.9	5.8	1.28	5.25	59.6	531300	8	88	4	0	0	420	4620	210	0	0	235	124	41	85	12	0.1		0.1	129	32	0.24	10.9	11.2	6	3.8	2.2	152	8.6	112	22.1	17.7
T102	Rps27l^Rps27	hom	5.51	10.45	15	53.4	51.1	14.4	28.1	1819	20.6	8.3	6.9	5.7	1.25	5.84	61.3	610280	19	74	5	2	0	1047	4077	276	110	0	201	83	60	62	11	0.1			129	26	0.27	10.6	10.1	5.7	3.5	2.2	156	7.9	114	23.9	19.7
T232	WT	WT	8.41	10.38	15.3	55.4	53.4	14.7	27.6	2113	19.4	8	6.7	5.2	1.42	4.78	55.6	496164	6	92	2	0	0	505	7737	168	0	0	183	54	39	85	11	<0.1			134	30	0.32	10.8	10.4	5.9	3.6	2.3	155	7.4	113	20.8	20.9
T274	WT	WT	5.99	10.19	15.2	54.3	53.3	14.9	28	2004	19.2	8.4	7	6.6	1.41	5.15	57.8	524785	8	84	6	2	0	479	5032	359	120	0	254	74	43	84	6	0.1	0	0.1	141	30	0.27	11	11.2	5.7	3.5	2.2	152	8.6	111	25.2	17.7
T106	WT	WT	6.64	10.8	15.5	54	50	14.4	28.7	1943	21.5	8.2	6.7	5.1	1.31	5.45	55.6	588600	37	49	12	2	0	2457	3254	797	133	0	222	88	54	61	9	0.1	0	0.1	120	24	0.32	10.7	12.7	5.8	3.4	2.4	153	9.1	112	23.8	16.8
[truncated: 1 more columns]
