# Supplementary material for: Subfunctionalized expression drives evolutionary retention of ribosomal protein paralogs Rps27 and Rps27l in vertebrates
Source: eLife. 2023 Jun 12;12:e78695. doi: 10.7554/eLife.78695 (PMC10313321; doi:10.7554/eLife.78695)
Supplement: Supplementary file 6. [file elife-78695-supp6.xlsx]

## Sheet: aged_bloodwork
ID	Lineage	Zygosity	Alanine Aminotransferase (U/L)	Aspartate Aminotransferase (U/L)	Alkaline Phosphatase (IU/L)	Basophil (absolute)	Basophils (%)	Eosinophil (absolute)	Eosinophils (%)	Gamma-Glutamyl Transferase (U/L)	Hematocrit (%)	Hemoglobin (gm/dL)	Immature Reticulocyte Fraction (%)	Lymphocyte (absolute)	Lymphocytes (%)	Mean Corpuscular Hemoglobin (pg)	Mean Corpuscular Hemoglobin Concentration (g/dL)	Mean Corpuscular Volume (fL)	Mean Platelet Volume (fL)	Monocyte (absolute)	Monocytes (%)	Neutrophil (absolute)	Neutrophils (%)	Platelet-Large Cell Ratio (%)	Plateletcrit (%)	Platelet Distribution Width (fL)	Platelet (count)	Red Blood Cell (M/uL)	Red Cell Distribution Width (%)	Reticulocyte (absolute)	Reticulocyte (%)	Total Bilirubin (mg/dL)	White Blood Cell (K/uL)	Weight (g)
T1000	Rps27^Rps27l	WT	45	60	70	0	0	107	2	4	44.9	13.7	57.6	2505	47	13.7	30.5	44.9	7	800	15	1919	36	3.7	1.76	6.8	1735	10	19.7	295000	2.95	0.5	5.33	41
T1001	Rps27^Rps27l	WT	42	51	69	0	0	60	1	6	47.2	14.6	57.6	3805	63	13.9	30.9	45.1	7	725	12	1450	24	4.2	1.87	6.8	1932	10.47	18.8	337134	3.22	0.4	6.04	40
T388	Rps27l^Rps27	het	107	76	99	0	0	86	1	4	49.5	15.1	63.4	7097	83	15	30.5	49.2	6.8	599	7	770	9	5	1.41	6.9	1491	10.07	17.7	414884	4.12	0.6	8.55	50
T390	Rps27l^Rps27	WT	49	72	72	0	0	248	4	3	47.9	14.7	61.2	5323	86	14.7	30.7	47.8	6.8	186	3	433	7	3.9	1.29	6.7	1442	10.02	17.5	449898	4.49	0.6	6.19	43
T408	Rps27l^Rps27	hom	42	61	57	0	0	156	2	1	50.4	14.8	68.8	6535	84	13.9	29.4	47.4	7.3	389	5	700	9	4.6	1.92	6.9	1993	10.63	18.7	649493	6.11	0.6	7.78	47
T409	Rps27l^Rps27	het	45	81	70	0	0	393	5	0	49.3	14.8	69.7	6052	77	14.3	30	47.5	7.6	472	6	943	12	5.7	0.6	7.1	617	10.37	18.2	464576	4.48	0.8	7.86	43
T410	Rps27l^Rps27	WT	34	54	45	0	0	94	1	1	47	13.8	68.3	7733	82	13.7	29.4	46.7	7.3	566	6	1037	11	4.2	1.91	6.9	1894	10.07	18.5	591109	5.87	0.7	9.43	42
T411	Rps27l^Rps27	WT	72	64	83	0	0	99	1	1	53.9	16.1	66.9	8937	90	14.1	29.9	47.3	7.4	397	4	497	5	4.9	1.64	6.9	1551	11.39	19.4	593419	5.21	0.7	9.93	47
T412	Rps27l^Rps27	het	28	51	55	0	0	214	4	4	44.6	13.4	66.3	4379	82	13.6	30	45.2	7	320	6	427	8	4.8	1.61	6.8	1876	9.86	19.6	538356	5.46	0.7	5.34	37
T419	Rps27l^Rps27	het	58	50	58	0	0	125	2	6	50.4	15.3	65	5438	87	14.4	30.4	47.5	6.8	188	3	500	8	3.6	1.43	6.6	1589	10.6	17.8	429300	4.05	0.7	6.25	43
T421	Rps27l^Rps27	het	148	88	90	0	0	85	1	4	50.3	15.3	68.1	6091	72	14.9	30.4	48.9	6.9	677	8	1607	19	3.7	1.27	6.6	1467	10.29	17.6	482601	4.69	0.8	8.46	52
T423	Rps27l^Rps27	hom	164	111	93	0	0	86	1	5	51.2	15.9	66.2	6536	76	14.7	31.1	47.3	6.9	602	7	1376	16	3.8	1.5	6.7	1645	10.82	18.3	476080	4.4	0.8	8.6	52
T426	Rps27l^Rps27	het	107	73	76	0	0	74	1	2	46.4	13.9	74.5	6403	87	15.2	30	50.8	6.9	294	4	589	8	3.4	1.38	6.8	1555	9.14	17.4	828084	9.06	0.7	7.36	45
T437	Rps27^Rps27l	hom	33	62	52	0	0	140	3	3	49.7	14.7	54.7	3596	77	14	29.6	47.4	7	234	5	701	15	4.4	1.55	6.7	1748	10.48	17.8	397192	3.79	0.9	4.67	37
T438	Rps27^Rps27l	hom	33	70	70	0	0	81	1	4	52.1	15.7	58.8	6186	76	15.3	30.1	50.7	7.3	407	5	1465	18	5.7	1.25	7	1214	10.28	18.4	385500	3.75	1	8.14	39
T439	Rps27^Rps27l	WT	53	97	56	0	0	106	2	4	52.1	15.5	60.1	4558	86	14.4	29.8	48.3	7	159	3	477	9	4.2	1.5	6.7	1673	10.79	19.3	440232	4.08	1	5.3	41
T441	Rps27^Rps27l	WT	155	117	84	0	0	0	0	4	53.3	15.8	57.2	4504	81	14.5	29.6	48.8	7.2	222	4	834	15	5.1	1.47	6.9	1580	10.92	18.3	400764	3.67	1.1	5.56	47
T443	Rps27^Rps27l	WT	69	87	64	0	0	162	3	6	53.2	15.7	52.5	4635	86	14.6	29.5	49.3	6.7	162	3	431	8	4	1.52	7.1	1560	10.79	18.7	394914	3.66	1	5.39	46
T444	Rps27^Rps27l	het	92	74	61	0	0	68	1	3	55.5	16.4	59.1	5424	80	14.5	29.5	49.1	7	203	3	1085	16	4.9	1.59	6.8	1525	11.31	18.6	366444	3.24	1	6.78	46
T447	Rps27^Rps27l	WT	100	96	79	0	0	0	0	3	54.4	16.2	58.3	5040	86	14.8	29.8	49.9	7.1	117	2	703	12	4.4	1.68	6.8	1698	10.91	18.3	433127	3.97	0.5	5.86	49
T448	Rps27^Rps27l	hom	287	186	101	0	0	246	3	5	53	15.8	56	6716	82	14.8	29.8	49.5	7	491	6	737	9	4.1	1.44	6.7	1477	10.71	18.2	371637	3.47	0.4	8.19	49
T515	Rps27^Rps27l	het	30	46	53	0	0	68	1	5	48.4	14.1	62.4	4767	70	14.2	29.1	48.8	7.1	477	7	1498	22	4.4	1.48	6.8	1570	9.92	18.3	405728	4.09	0.4	6.81	37
T518	Rps27^Rps27l	WT	43	151	62	0	0	94	1	5	47.7	14.2	62.7	7042	75	14.8	29.8	49.7	7.2	751	8	1502	16	5.5	1.5	6.9	1883	9.6	17.6	418560	4.36	0.5	9.39	36
T576	Rps27l^Rps27	het	35	84	65	0	0	0	0	6	51.4	15.1	59.2	10350	90	14.1	29.4	47.9	6.9	690	6	460	4	3.6	1.31	6.6	1494	10.73	18.5	392718	3.66	0.5	11.5	42
T592	Rps27l^Rps27	hom	51	71	50	0	0	0	0	5	40.4	12.2	67.5	6484	86	15.1	30.2	50.1	7.4	226	3	829	11	6.6	2.66	7.3	2406	8.07	16.7	728721	9.03	0.7	7.54	44
T594	Rps27l^Rps27	hom	126	117	93	0	0	0	0	7	48.1	14.7	60.3	6559	67	14.4	30.6	47.1	7.1	587	6	2643	27	5.1	2	7	1890	10.21	18	489059	4.79	0.7	9.79	44
T596	Rps27l^Rps27	WT	145	138	67	0	0	0	0	7	51.4	15.6	59.3	5145	59	14	30.4	46.1	7.7	610	7	2965	34	6.1	1.82	7.2	1502	11.15	19.1	418125	3.75	0.7	8.72	44
T666	Rps27l^Rps27	WT	58	60	87	0	0	89	1	9	47.4	14.2	63.5	8108	91	14.1	30	46.9	7.3	178	2	535	6	5.1	1.73	7.1	1605	10.1	17.4	430260	4.26	1	8.91	46
T671	Rps27l^Rps27	hom	217	112	140	0	0	163	1	12	50.5	15.5	65	12255	75	14.9	30.7	48.5	7.4	1144	7	2778	17	4.9	1.59	7	1593	10.42	18.3	507454	4.87	0.9	16.34	53
T673	Rps27^Rps27l	hom	29	49	66	0	0	74	2	6	45.5	14.2	59.9	2738	74	14.1	31.2	45.2	7	185	5	703	19	4.8	1.52	6.9	1492	10.06	17.8	368196	3.66	0.3	3.7	36
T674	Rps27^Rps27l	hom	37	67	70	0	0	116	3	9	44.3	13.9	60.7	2638	68	14.1	31.4	44.9	7.1	272	7	854	22	5.1	1.59	6.9	1602	9.86	17.5	349044	3.54	0.4	3.88	32
T677	Rps27^Rps27l	WT	37	68	71	0	0	47	1	7	44.3	13.6	61.9	2791	59	13.7	30.7	44.5	6.8	378	8	1514	32	4.4	1.49	6.8	1606	9.95	17.8	370140	3.72	0.4	4.73	35
T680	Rps27^Rps27l	hom	37	49	63	0	0	0	0	6	48.4	14.8	63	3042	79	13.9	30.6	45.4	7.2	270	7	539	14	4.4	1.66	6.8	1642	10.65	18.5	382335	3.59	0.4	3.85	45
T684	Rps27^Rps27l	WT	50	78	72	0	0	124	2	6	46	14.3	64.2	3343	54	14.1	31.1	45.4	7.3	619	10	2105	34	4.3	1.63	6.9	1614	10.13	18.2	403174	3.98	0.4	6.19	38
T692	Rps27l^Rps27	WT	32	49	93	0	0	107	1	9	44.1	13.2	68.3	8733	82	13.3	29.9	44.5	7	426	4	1385	13	4.2	2.14	6.8	2153	9.92	19	532704	5.37	0.9	10.65	31
T693	Rps27l^Rps27	het	31	54	88	0	0	219	2	12	47.7	14.5	64.8	9080	83	13.9	30.4	45.6	6.9	328	3	1313	12	4.2	1.73	6.7	1776	10.45	18.5	515185	4.93	0.9	10.94	38
T837	Rps27l^Rps27	het	70	57	70	0	0	90	2	7	44.4	13.4	71.3	3906	87	15.4	30.2	51.2	7.4	180	4	314	7	6.2	1.64	7.2	1533	8.68	17.8	931364	10.73	0.8	4.49	44
T863	Rps27l^Rps27	hom	45	71	73	0	0	97	2	8	45.6	14.1	66.4	3506	72	14.4	30.9	46.7	7	146	3	1120	23	5.3	1.67	7	1753	9.76	18.5	564128	5.78	0.9	4.87	37
T864	Rps27l^Rps27	het	36	54	56	0	0	127	2	8	46.1	14.1	61.4	3925	62	14.3	30.6	46.8	7.1	190	3	2089	33	4	1.69	6.8	1713	9.86	18.6	525538	5.33	0.9	6.33	39
T869	Rps27l^Rps27	WT	45	65	59	0	0	160	3	10	47.7	14.8	59.2	3145	59	14.3	31	46.1	6.8	373	7	1652	31	4.1	1.7	6.8	1665	10.35	18.8	521640	5.04	0.9	5.33	39
T906	Rps27l^Rps27	het	71	56	93	0	0	79	1	4	49.6	15.2	64.7	7119	90	14.2	30.6	46.4	6.8	237	3	475	6	3.7	1.84	7	1863	10.7	18.9	585290	5.47	0.8	7.91	46
T926	Rps27^Rps27l	het	57	67	68	0	0	0	0	5	47.3	14.5	61.1	3101	68	14	30.7	45.6	7.4	274	6	1186	26	5.5	1.75	7.1	1578	10.37	18.5	416874	4.02	0.5	4.56	37
T927	Rps27^Rps27l	hom	39	80	56	0	0	232	2	7	42.4	12.8	65.3	6259	54	13.3	30.2	44.2	7.6	1623	14	3477	30	7.2	2.01	7.4	1849	9.59	19.2	531286	5.54	0.3	11.59	30
T928	Rps27^Rps27l	WT	45	82	43	0	0	0	0	6	39	11.8	66.4	2795	43	13.9	30.3	46	7.5	910	14	2795	43	6.8	1.78	7.4	1622	8.48	19.3	566464	6.68	0.2	6.5	31
