# Supplementary material for: Subfunctionalized expression drives evolutionary retention of ribosomal protein paralogs Rps27 and Rps27l in vertebrates
Source: eLife. 2023 Jun 12;12:e78695. doi: 10.7554/eLife.78695 (PMC10313321; doi:10.7554/eLife.78695)
Supplement: Supplementary file 7. [file elife-78695-supp7.xlsx]

## Sheet: qPCR
target	notes	forward primer 5' -> 3"	reverse primer 5' -> 3'
Gapdh		CATGGCCTTCCGTGTTCCTA	CCTGCTTCACCACCTTCTTGAT
Trp53		CCTCAGCATCTTATCCGAGTGG	TGGATGGTGGTACAGTCAGAGC
Rps27	primer set 1	ACGACCTCCCTACGAGAACA	TAGCATCCTGGGCATTTCACG
Rps27	primer set 2	TGACGACCTCCCTACGAGAA	ATAGCATCCTGGGCATTTCAC
Rps27l	primer set 1	GAGCCGTCACCATGCCC	TTGTAGCAACCTGGACATTTCAC
Rps27l	primer set 2	CTTGCGGAGCCGTCACCAT	GTAGCAACCTGGACATTTCACATC
Rps27a		CCGCCATCGTGGGTGGAG	TCCTTATCCTGGATCTTGGCCT
Rps6		TCCGCCAGTATGTTGTCAGG	ATACGTCGGCGTTTGTGTTG

## Sheet: mESC FLAG insertion CRISPR
targeted locus	construct	insert sequence 5' -> 3'	backbone
Rps27	gRNA1	GTTCCAGGATGCTCCTTCAGG	PX459
Rps27	gRNA2	GCTTGTTTAACTGGTAGCAAG	PX459
Rps27	donor template	CTTGTTTAACTGGTAGCAAGTGGCAGGATGCTATAAAATCACCACGGTCTTTAGCCATGCACAAACGGTAGTCTTGTGTGTTGGCTGCTCCACTGTCCTCTGTCAGCCTACAGGTGGAAAAGCAAGGCTGACAGAAGGTGAGTGGTCTCAGTGTTGGGGTTTTGTTTGGCTTTGGGGTCCTAAGGTGAAAGGCTGAGTAGAATGCAAGGCTTCCGGCTGGTAAAGCCAGCTGCACTCCTGTTAGGAAGGTTTAGCACTCTGCAGATGAGGCAGGGTCAGTGGCAGGCAGAAGTAACGTTTGCATCTTTTTCTTCCAGGATGCTCCTTCAGGagaAAGCAGCACGGTGGCGGGAGTGGTGGCGGGTCCGACTACAAAGACCATGACGGTGATTATAAAGA…	pCR4Blunt-TOPO (Thermo Fisher 450031)
Rps27l	gRNA1	GTCTAAATGAACAGCCTGCAA	PX459
Rps27l	gRNA2	GACTAATGAGCTATGAAGTTC	PX459
Rps27l	donor template	ACTAATGAGCTATGAAGTTCCGGGGAGACTGAAGATGAAAGGGACTGAGGAATTGGAGAATAAGAATCTTTAAAACAATTTGAACGATTGAATTTGGTTTGTGGTCTTAAATAGATTCCATGGTATAATTTGAAAACAAGTAACCATTGTGTTTATGTCAGGATAAACCCATACACGGTTATTATAGCAAATTTATATTAGTCATAATAATATTCGGAAACTTGTTTCCTATTTAAAATCTAACATTCCTACATCTAATCTAAGATTTCTAAGACttttttttttAATTTAAAAGTACTTTTTGCCACTAAAATCACACCAAAGATAGAGTAAGATGTTTAATACACTCTTCTGATTCCTTTGCAGggTGTTCATTTAGAAGAAAGCAACACGGTGGCG…	pCR4Blunt-TOPO (Thermo Fisher 450031)

## Sheet: ribosome profiling oligos
nomenclature for nucleotide sequences
[ACGT]	Nucleotides
N	A random nucleotide
r[ACGUN]	Ribonucleotides
/5Phos/	5′ phosphorylation
/3Phos/	3′ phosphorylation
/iSp18/	An 18-atom hexa-ethyleneglycol spacer
/3ddC/	Dideoxycytidine
ID	sequence 5' -> 3'	type	scale and format	purification	notes
NI-798	AATGATACGGCGACCACCGAGATCTACACTCTTTCCCTACACGACGCTC	DNA	100nm	PAGE	forward library PCR primer
NI-799	CAAGCAGAAGACGGCATACGAGATCGTGATGTGACTGGAGTTCAGACGTGTG	DNA	100nm	PAGE	reverse library PCR primer
NI-822	CAAGCAGAAGACGGCATACGAGATACATCGGTGACTGGAGTTCAGACGTGTG	DNA	100nm	PAGE	reverse library PCR primer
NI-823	CAAGCAGAAGACGGCATACGAGATGCCTAAGTGACTGGAGTTCAGACGTGTG	DNA	100nm	PAGE	reverse library PCR primer
NI-824	CAAGCAGAAGACGGCATACGAGATTGGTCAGTGACTGGAGTTCAGACGTGTG	DNA	100nm	PAGE	reverse library PCR primer
NI-825	CAAGCAGAAGACGGCATACGAGATCACTGTGTGACTGGAGTTCAGACGTGTG	DNA	100nm	PAGE	reverse library PCR primer
NI-826	CAAGCAGAAGACGGCATACGAGATATTGGCGTGACTGGAGTTCAGACGTGTG	DNA	100nm	PAGE	reverse library PCR primer
NI-829	CAAGCAGAAGACGGCATACGAGATGATCTGGTGACTGGAGTTCAGACGTGTG	DNA	100nm	PAGE	reverse library PCR primer
NI-830	CAAGCAGAAGACGGCATACGAGATTCAAGTGTGACTGGAGTTCAGACGTGTG	DNA	100nm	PAGE	reverse library PCR primer
NI-831	CAAGCAGAAGACGGCATACGAGATCTGATCGTGACTGGAGTTCAGACGTGTG	DNA	100nm	PAGE	reverse library PCR primer
NI-832	CAAGCAGAAGACGGCATACGAGATAAGCTAGTGACTGGAGTTCAGACGTGTG	DNA	100nm	PAGE	reverse library PCR primer
NI-833	CAAGCAGAAGACGGCATACGAGATGTAGCCGTGACTGGAGTTCAGACGTGTG	DNA	100nm	PAGE	reverse library PCR primer
NI-834	CAAGCAGAAGACGGCATACGAGATTACAAGGTGACTGGAGTTCAGACGTGTG	DNA	100nm	PAGE	reverse library PCR primer
NI-802	/5Phos/NNAGATCGGAAGAGCGTCGTGTAGGGAAAGAG/iSp18/GTGACTGGAGTTCAGACGTGTGCTC	DNA	100nm	HPLC	reverse transcription primer 5' phos for ligation by CircLigase NN to reduce sequence bias of ligation 18-atom hexa-ethyleneglycol spacer to block rolling circle amplification
NI-803	GTGACTGGAGTTCAGACGTGTGCTCTTCCGATCAGCATGNNNNNTCGCATTACCCTGTTATCCCTAACATNNAGATCGGAAGAGCGTCGTGTAGGGAAAGAG	DNA	4nmU	STD	Circularization product synthetic control, index CATGC
NI-804	/5Phos/NNAGATCGGAAGAGCGTCGTGTAGGGAAAGAG/iSp18/GTGACTGGAGTTCAGACGTGTGCTCTTCCGATCACAGTCNNNNNTCGCATTACCCTGTTATCCCTAACAT	DNA	4nmU	STD	RT product synthetic control, index GACTG
NI-810	/5Phos/NNNNNATCGTAGATCGGAAGAGCACACGTCTGAA/3ddC/	DNA	100nm	PAGE	barcoded linker oligonucleotides 5' phos to enable pre-adenylation --> ligation to RNA fragments 3' blocked to prevent linker concatemers UMIs
NI-811	/5Phos/NNNNNAGCTAAGATCGGAAGAGCACACGTCTGAA/3ddC/	DNA	100nm	PAGE	see NI-810
NI-812	/5Phos/NNNNNCGTAAAGATCGGAAGAGCACACGTCTGAA/3ddC/	DNA	100nm	PAGE	see NI-810
NI-813	/5Phos/NNNNNCTAGAAGATCGGAAGAGCACACGTCTGAA/3ddC/	DNA	100nm	PAGE	see NI-810
NI-814	/5Phos/NNNNNGATCAAGATCGGAAGAGCACACGTCTGAA/3ddC/	DNA	100nm	PAGE	see NI-810
NI-815	/5Phos/NNNNNGCATAAGATCGGAAGAGCACACGTCTGAA/3ddC/	DNA	100nm	PAGE	see NI-810
NI-816	/5Phos/NNNNNTAGACAGATCGGAAGAGCACACGTCTGAA/3ddC/	DNA	100nm	PAGE	see NI-810
NI-817	/5Phos/NNNNNTCTAGAGATCGGAAGAGCACACGTCTGAA/3ddC/	DNA	100nm	PAGE	see NI-810
NI-827	CTCTTTCCCTACACGACGCTC	DNA	25nm	STD	forward qPCR primer
NI-828	GTGACTGGAGTTCAGACGTGTG	DNA	25nm	STD	reverse qPCR primer
NI-800	rArUrGrUrArCrArCrUrArGrGrGrArUrArArCrArGrGrGrUrArArUrCrArArCrGrCrGrA/3Phos/	RNA	100nmR	STD	34 nt RNA size selection marker
NI-801	rArUrGrUrUrArGrGrGrArUrArArCrArGrGrGrUrArArUrGrCrGrA/3Phos/	RNA	100nmR	STD	26 nt RNA size selection marker
NI-805-ACTGA	rArUrGrUrUrArGrGrGrArUrArArCrArGrGrGrUrArArUrGrCrGrAACTGACGATCTGATCGGAAGAGCACACGTCTGAArC	RNA	4nmRU	STD	Post-ligation synthetic control, index CGATC. The original NI-805 sequence has an NNNNN sequence, but this was replaced with a randomly chosen ACTGA for ease and cost of synthesis

## Sheet: mouse homogenization CRISPR
targeted locus	desired edit	construct	sequence	format
Rps27	Rps27 protein -> Rps27l	gRNA1	/AlTR1/rCrUrGrCrCrCrCrUrUrUrUrArGrCrUrCrGrCrArArGrUrUrUrUrArGrArGrCrUrArUrGrCrU/AlTR2/	IDT Alt-R CRISPR-Cas9 crRNA
Rps27	Rps27 protein -> Rps27l	gRNA2	/AlTR1/rUrGrArArArArCrCrArCrUrUrCrCrUrUrArCrCrUrGrUrUrUrUrArGrArGrCrUrArUrGrCrU/AlTR2/	IDT Alt-R CRISPR-Cas9 crRNA
Rps27	Rps27 protein -> Rps27l	donor template	GGGGCGAGTTCTCCTCGGTGTGTGCCAGTGGGGGCTCTTTCCCATCATCTCTTTCCTCCATTACCTTCTAAGTCTTTGCATTTCTGCCCCTTTTAGCTCGCAcgcGATCTCCTTCATCCCTCTctcGAAGAGGAGAAGaaaAAACACAAGAAAAAGCGCCTGGTGCAGAGCCCCAATTCCTACTTTATGGACGTGAAAtgtCCAGGTAAGGAAGTGGTTTTCAGCTGTGCGGGAAAACTAAACTGTACTAATGGTTGTAACTTAATTTTTGATTTTATTACGAGTTCAGAAGTGGTAACTTGGAGA	GeneWiz ssDNA
Rps27l	Rps27l protein -> Rps27	gRNA1	/AlTR1/rArArCrArGrArUrCrUrCrUrArGrCrCrArGrCrUrGrGrUrUrUrUrArGrArGrCrUrArUrGrCrU/AlTR2/	IDT Alt-R CRISPR-Cas9 crRNA
Rps27l	Rps27l protein -> Rps27	gRNA2	/AlTR1/rCrCrUrGrArArArCrGrUrCrCrUrUrUrArGrGrArCrGrUrUrUrUrArGrArGrCrUrArUrGrCrU/AlTR2/	IDT Alt-R CRISPR-Cas9 crRNA
Rps27l	Rps27l protein -> Rps27	donor template	GCGGAGTGTGCCTGTTGCTCCTGCTTTGCGTTCCTCGTGTGATTCGGGCTGCCACCCGTGTACTGTGACTCCAGTAGTAACAATATGTTTCCTTCCACAGCTGGCTaagGATCTGTTACACCCTTCCccaGAGGAGGAGAAGaggAAACATAAGAAGAAACGGCTGGTTCAGAGCCCAAATTCTTACTTCATGGATGTGAAATGTCCAGGTATAAAATTTCAAATTTCcgtGTCCTAAAGGACGTTTCAGGAAAGATTCACACTTTAATAAGTCAGGATCCACTGTTGACTAGAAATGACATTACAGAATTGTCATAAGGGTCATTTTAAAGAA	GeneWiz ssDNA

## Sheet: mouse genotyping primers
lineage	primer 1 name	primer 1 sequence	primer 2 name	primer 2 sequence	primer 3 name	primer 3 sequence	primer 4 name	primer 4 sequence	WT allele amplicon size (bp)	modified allele amplicon size (bp)
Trp53	oAFX417	ccacagctccagcaggtgt	oAFX418	gcctgaagaacgagatcagc	oAFX419	gggactcgtggaacagaaac	n/a	n/a	341	300
Rps27_exon2del	oAFX326	CCGAAGATGGCGAAGCAACAC	oAFX413	GGGATGAAGGAGATCcttTGCGAG	oAFX416	AATTCCTACTTTATGGACGTGAAAtGGAAG	oAFX259	CCTTGCATTCTACTCAGCCTTTCAC	448	352
Rps27l_exon2del	oAFX197	CGAGCGCTGTAAAGTGCCAG	oAFX198	ACCGTTAACATTTCAGCATGTAACAGAC	n/a	n/a	n/a	n/a	713	393
Rps27^Rps27l	oAFX258	GCGCTAATTGCGGGTCCTACAG	oAFX322	agAGAGGGATGAAGGAGATCgcg	oAFX325	CCCTCTCCAGAAGAGGAGAAGAGG	oAFX259	CCTTGCATTCTACTCAGCCTTTCAC	419	278
Rps27l^Rps27	oAFX195	CCATGGGCTTCAGGGTCACTAAC	oAFX409	CTCcaaGGAAGGGTGTAACAGATCtc	oAFX410	TTCCccaGAGGAGGAGAAGagg	oAFX196	AGTCAACGTATCCTTTACCTGGCTC	465	268
